# Supplementary material for: Relative stereochemical determination of the C61–C83 fragment of symbiodinolide using a stereodivergent synthetic approach
Source: Royal Society of Chemistry journal article supplement (doi:10.1039/d3ob01420g), 2023-01-01

## Supplementary Information

Relative stereochemical determination of the C61–C83 fragment of symbiodinolide using a stereodivergent synthetic approach

Hiroyoshi Takamura,\* Kosuke Hattori, Takumi Ohashi, Taichi Otsu and Isao Kadota

Department of Chemistry, Graduate School of Natural Science and Technology, Okayama University, 3-1-1 Tsushimanaka, Kita-ku, Okayama 700-8530, Japan

takamura@cc.okayama-u.ac.jp

### Table of Contents

|                                                                                                                                                                            |          |
|----------------------------------------------------------------------------------------------------------------------------------------------------------------------------|----------|
| General Methods                                                                                                                                                            | S2       |
| Experimental Procedures and Characterization Data                                                                                                                          | S2–S40   |
| Stereochemical Determination of <b>17</b> (Scheme S1 and Figure S1)                                                                                                        | S4–S5    |
| Stereochemical Determination of <b>18</b> (Scheme S2)                                                                                                                      | S7–S8    |
| Stereochemical Determination of <b>20</b> (Scheme S3)                                                                                                                      | S9–S10   |
| <sup>1</sup> H NMR Chemical Shifts and Their Deviations of Natural Symbiodinolide ( <b>1</b> ) and the Synthetic Products <b>3a</b> and <b>3b</b> (Table S1 and Table S2)  | S16      |
| Stereochemical Determination of <b>46</b> (Scheme S4 and Figure S2)                                                                                                        | S20–S21  |
| Stereochemical Determination of <b>S9</b> (Scheme S5 and Figure S3)                                                                                                        | S24      |
| Stereochemical Determination of <b>53</b> (Scheme S6)                                                                                                                      | S28      |
| Stereochemical Determination of <b>58</b> (Scheme S7)                                                                                                                      | S32      |
| Stereochemical Determination of <b>63</b> (Scheme S8 and Figure S4)                                                                                                        | S35–S36  |
| <sup>1</sup> H NMR Chemical Shifts and Their Deviations of Natural Symbiodinolide ( <b>1</b> ) and the Synthetic Products <b>4a–4h</b> (Table S3, Table S4, and Table S5)  | S40      |
| <sup>13</sup> C NMR Chemical Shifts and Their Deviations of Natural Symbiodinolide ( <b>1</b> ) and the Synthetic Products <b>4a–4h</b> (Table S6, Table S7, and Table S8) | S40–S41  |
| References                                                                                                                                                                 | S41      |
| NMR Spectra                                                                                                                                                                | S42–S187 |

**General Methods.** Unless otherwise indicated, all reagents were purchased from common commercial suppliers and used as received. All reactions were carried out under an argon atmosphere. Heated reactions were conducted using an oil bath. Reaction solvents were purchased as dehydrated solvents and stored over activated molecular sieves 4Å under argon prior to use. All solvents for the work-up procedures were used as received. Analytical thin layer chromatography (TLC) was performed using aluminum TLC plates (Merck TLC silica gel 60F<sub>254</sub>). Column chromatography was performed on Fuji Silysia silica gel BW-300 or Kanto Chemical silica gel 60N. IR spectra were recorded on JASCO FT/IR-460 plus or JASCO FT/IR-FT-001. NMR spectra were recorded on JEOL JNM-AL400, Varian 400-MR, or Varian NMR System PS600. Chemical shifts in the NMR spectra are reported in ppm with reference to the internal residual solvent (for <sup>1</sup>H NMR, CDCl<sub>3</sub>: 7.26 ppm, C<sub>6</sub>D<sub>6</sub>: 7.16 ppm, CD<sub>3</sub>OD: 3.30 ppm; for <sup>13</sup>C NMR, CDCl<sub>3</sub>: 77.0 ppm, C<sub>6</sub>D<sub>6</sub>: 128.0 ppm, CD<sub>3</sub>OD: 49.0 ppm). The following abbreviations are used to designate the multiplicity: s = singlet, d = doublet, t = triplet, q = quartet, m = multiplet, br = broad. Coupling constants (*J*) are given in Hertz. High-resolution mass spectra were recorded on Bruker micrOTOF II (ESI-TOF-MS) or Waters Micromass LCT (ESI-TOF-MS).

**Tetraacetate 12.** To a solution of acetoxy ether **10** (1.07 g, 3.22 mmol) in MeCN (32 mL) were added 2-[(acetoxymethyl)allyl]trimethylsilane (**11**, 0.83 mL, 3.86 mmol) and TMSOTf (0.24 mL, 1.29 mmol) at -20 °C. The mixture was warmed up to 0 °C and stirred at the same temperature for 10 min. The reaction was quenched with Et<sub>3</sub>N. The mixture was diluted with EtOAc, washed with saturated aqueous NaHCO<sub>3</sub>, H<sub>2</sub>O, and brine, and then dried over Na<sub>2</sub>SO<sub>4</sub>. Concentration and column chromatography (hexane/EtOAc = 2:1) gave tetraacetate **12** (1.15 g, 93%): colorless oil; *R*<sub>f</sub> = 0.49 (hexane/EtOAc = 1:1); [ $\alpha$ ]<sub>D</sub><sup>24</sup> +28.9 (*c* 0.96, CHCl<sub>3</sub>); IR (neat) 3084, 2956, 2888, 1731, 1653 cm<sup>-1</sup>; <sup>1</sup>H NMR (400 MHz, CDCl<sub>3</sub>)  $\delta$  5.15 (s, 1 H), 5.13–5.10 (m, 1 H), 5.07 (s, 1 H), 4.85 (t, *J* = 7.2 Hz, 1 H), 4.59 (d, *J* = 13.2 Hz, 1 H), 4.53 (d, *J* = 13.2 Hz, 1 H), 4.36 (dd, *J* = 11.9, 6.4 Hz, 1 H), 4.20–4.17 (m, 1 H), 4.07 (dd, *J* = 11.9, 3.4 Hz, 1 H), 3.94–3.90 (m, 1 H), 2.54 (dd, *J* = 14.8, 8.9 Hz, 1 H), 2.28 (dd, *J* = 14.8, 5.5 Hz, 1 H), 2.08 (s, 3 H), 2.07 (s, 3 H), 2.06 (s, 3 H), 2.05 (s, 3 H), 2.04–1.96 (m, 1 H), 1.90–1.83 (m, 1 H); <sup>13</sup>C NMR (100 MHz, CDCl<sub>3</sub>)  $\delta$  170.5, 170.4, 169.8, 169.6, 140.0, 115.5, 70.9, 68.6, 68.6, 68.5, 66.5, 62.0, 36.3, 32.4, 21.1, 20.9, 20.9, 20.8; HRMS (ESI-TOF) calcd for C<sub>18</sub>H<sub>26</sub>O<sub>9</sub>Na [M + Na]<sup>+</sup> 409.1475, found 409.1476.

**Tetrakis-TBS Ether 13.** To a solution of tetraacetate **12** (1.10 g, 2.85 mmol) in MeOH (29 mL) was added NaOMe (231 mg, 4.28 mmol) at 0 °C. The mixture was stirred at room temperature for 1 h. The mixture was neutralized with 1.0 M aqueous HCl at 0 °C. The mixture was diluted with MeOH and dried over Na<sub>2</sub>SO<sub>4</sub>. Concentration gave the corresponding tetraol (1.14 g), which was used for the next step without further purification.

To a solution of the tetraol obtained above (1.14 g) in DMF (29 mL) were added DMAP (279 mg, 2.28 mmol), imidazole (3.10 g, 45.6 mmol), and TBSCl (3.44 g, 22.8 mmol) at room temperature. The mixture was stirred at 80 °C for 2 h. To the mixture were added DMAP (140 mg, 1.14 mmol), imidazole (1.55 g, 22.8 mmol), and TBSCl (1.72 g, 11.4 mmol) at room temperature. The mixture was stirred at 80 °C for 2 h. The reaction was quenched with saturated aqueous NH<sub>4</sub>Cl at 0 °C. The mixture was diluted with EtOAc, washed with H<sub>2</sub>O and brine, and then dried over Na<sub>2</sub>SO<sub>4</sub>. Concentration and column chromatography (hexane, hexane/EtOAc = 50:1) gave tetrakis-TBS ether **13** (1.56 g, 81% in two steps): colorless oil;  $R_f$  = 0.41 (hexane/EtOAc = 10:1);  $[\alpha]_D^{22}$  +0.6 (*c* 1.09, CHCl<sub>3</sub>); IR (neat) 2955, 2929, 2886, 2857, 1652 cm<sup>-1</sup>; <sup>1</sup>H NMR (400 MHz, CDCl<sub>3</sub>)  $\delta$  5.10 (brs, 1 H), 4.91 (s, 1 H), 4.11–4.04 (m, 2 H), 3.97–3.85 (m, 3 H), 3.80 (d, *J* = 3.2 Hz, 1 H), 3.73 (t, *J* = 6.9 Hz, 1 H), 3.60 (d, *J* = 3.4 Hz, 1 H), 2.30 (dd, *J* = 14.4, 6.6 Hz, 1 H), 2.10 (dd, *J* = 14.4, 6.6 Hz, 1 H), 1.82–1.76 (m, 1 H), 1.39 (d, *J* = 13.9 Hz, 1 H), 0.91 (s, 9 H), 0.90 (s, 9 H), 0.90 (s, 9 H), 0.89 (s, 9 H), 0.06 (s, 6 H), 0.06 (s, 6 H), 0.06 (s, 6 H), 0.05 (s, 6 H); <sup>13</sup>C NMR (100 MHz, CDCl<sub>3</sub>)  $\delta$  145.4, 110.5, 80.1, 69.7, 67.9, 66.0, 64.0, 61.6, 39.4, 33.8, 25.9, 25.9, 25.9, 25.8, 18.4, 18.3, 18.0, 18.0, -4.8, -4.8, -5.0, -5.3, -5.4; HRMS (ESI-TOF) calcd for C<sub>34</sub>H<sub>74</sub>O<sub>5</sub>Si<sub>4</sub>Na [M + Na]<sup>+</sup> 697.4511, found 697.4508.

**Diol S1.** To a solution of tetrakis-TBS ether **13** (415 mg, 0.614 mmol) in CH<sub>2</sub>Cl<sub>2</sub> (3.1 mL) and MeOH (3.1 mL) was added CSA (42.7 mg, 0.184 mmol) at 0 °C. The mixture was stirred at the same temperature for 2 h. The reaction was quenched with Et<sub>3</sub>N. The mixture was diluted with EtOAc, washed with H<sub>2</sub>O and brine, and then dried over Na<sub>2</sub>SO<sub>4</sub>. Concentration and column chromatography (hexane/EtOAc = 2:1) gave diol **S1** (246 mg, 90%): colorless oil;  $R_f$  = 0.51 (hexane/EtOAc = 1:1);  $[\alpha]_D^{23}$  -1.9 (*c* 1.03, CHCl<sub>3</sub>); IR (neat) 3399, 2953, 2929, 2894, 2858, 1649 cm<sup>-1</sup>; <sup>1</sup>H NMR (400 MHz, CDCl<sub>3</sub>)  $\delta$  5.09 (s, 1 H), 4.94 (s, 1 H), 4.22–4.16 (m, 1 H), 4.10–4.08 (m, 3 H), 3.85–3.82 (m, 1 H), 3.80 (d, *J* = 3.2 Hz, 1 H), 3.47–3.44 (m, 1 H), 3.37 (d, *J* = 2.8 Hz, 1 H), 2.91 (brs, 1 H), 2.34–2.29 (m, 3 H), 1.98–1.92 (m, 1 H), 1.39 (d, *J* = 13.4 Hz, 1 H), 0.90 (s, 9 H), 0.90 (s, 9 H), 0.07 (s, 3 H), 0.07 (s, 3 H), 0.07 (s, 3 H), 0.06 (s, 3 H); <sup>13</sup>C NMR (100 MHz, CDCl<sub>3</sub>)  $\delta$  146.3, 113.9, 80.2, 69.4, 69.1, 66.6, 64.9, 60.5, 40.2, 34.0, 25.8, 18.0, -4.6, -4.7, -4.7, -4.8; HRMS (ESI-TOF) calcd for C<sub>22</sub>H<sub>46</sub>O<sub>5</sub>Si<sub>2</sub>Na [M + Na]<sup>+</sup> 469.2782, found 469.2782.

**Aldehyde 14.** To a solution of diol **S1** (13.3 mg, 29.8  $\mu$ mol) in CH<sub>2</sub>Cl<sub>2</sub> (1.0 mL) was added MnO<sub>2</sub> (13.0 mg, 0.150 mmol) at room temperature. The mixture was stirred at the same temperature for 5 h. To the mixture was added MnO<sub>2</sub> (13.0 mg, 0.150 mmol) at room temperature. The mixture was stirred at the same temperature for 12 h. The mixture was filtered through a Celite pad and washed with EtOAc. Concentration gave aldehyde **14** (13.2 mg, quant): yellow oil;  $R_f$  = 0.58 (hexane/EtOAc = 2:1);  $[\alpha]_D^{22}$  +0.2 (*c* 1.06, CHCl<sub>3</sub>); IR (neat) 3436, 2954, 2928, 2892, 2857, 1691 cm<sup>-1</sup>; <sup>1</sup>H NMR (400 MHz, CDCl<sub>3</sub>)  $\delta$  9.53 (s, 1 H), 6.49 (s, 1 H),

6.11 (s, 1 H), 4.10–4.06 (m, 2 H), 3.79–3.75 (m, 2 H), 3.47 (dd,  $J = 11.5, 3.2$  Hz, 1 H), 3.35 (s, 1 H), 2.51 (dd,  $J = 14.4, 7.9$  Hz, 1 H), 2.41 (dd,  $J = 14.4, 4.2$  Hz, 1 H), 1.92–1.85 (m, 1 H), 1.43 (d,  $J = 13.4$  Hz, 1 H), 0.89 (s, 9 H), 0.89 (s, 9 H), 0.06 (s, 3 H), 0.06 (s, 3 H), 0.06 (s, 3 H), 0.06 (s, 3 H);  $^{13}\text{C}$  NMR (100 MHz,  $\text{CDCl}_3$ )  $\delta$  194.3, 146.6, 136.2, 79.3, 69.6, 69.5, 64.0, 60.9, 34.4, 33.2, 25.9, 18.1, 18.1, -4.4, -4.6, -4.7; HRMS (ESI-TOF) calcd for  $\text{C}_{22}\text{H}_{44}\text{O}_5\text{Si}_2\text{Na}$  [ $\text{M} + \text{Na}$ ] $^+$  467.2625, found 467.2622.

**Diols 16 and 17.** To a solution of alkenyl iodide **15** (12.0 g, 36.6 mmol) in hexane (76 mL) was added *n*-BuLi (1.56 M in hexane, 23.5 mL, 36.6 mmol) at 0 °C. The mixture was stirred at room temperature for 30 min. To the mixture was added aldehyde **14** (4.07 g, 9.15 mmol) in hexane (5.0 mL + 5.0 mL + 5.0 mL) at 0 °C. The mixture was stirred at the same temperature for 10 min and stirred at room temperature for 1 h. The reaction was quenched with saturated aqueous  $\text{NH}_4\text{Cl}$ . The mixture was diluted with EtOAc, washed with  $\text{H}_2\text{O}$  and brine, and then dried over  $\text{Na}_2\text{SO}_4$ . Concentration and column chromatography (hexane/EtOAc = 4:1) gave diols **16** (3.33 g, 57%) and **17** (1.96 g, 33%). Diol **16**: colorless oil;  $R_f = 0.43$  (hexane/EtOAc = 2:1);  $[\alpha]_{\text{D}}^{22} - 7.3$  ( $c$  1.00,  $\text{CHCl}_3$ ); IR (neat) 3427, 2954, 2929, 2894, 2858  $\text{cm}^{-1}$ ;  $^1\text{H}$  NMR (400 MHz,  $\text{CDCl}_3$ )  $\delta$  5.72 (dt,  $J = 15.3, 7.2$  Hz, 1 H), 5.51 (dd,  $J = 15.3, 6.6$  Hz, 1 H), 5.14 (s, 1 H), 4.96 (s, 1 H), 4.56 (d,  $J = 6.6$  Hz, 1 H), 4.19 (dd,  $J = 11.8, 9.7$  Hz, 1 H), 4.15–4.11 (m, 1 H), 3.84–3.79 (m, 2 H), 3.61 (t,  $J = 6.5$  Hz, 2 H), 3.43 (d,  $J = 11.2$  Hz, 1 H), 3.35 (d,  $J = 2.7$  Hz, 1 H), 2.98 (brs, 1 H), 2.33 (dd,  $J = 14.5, 4.1$  Hz, 1 H), 2.25 (dd,  $J = 14.5, 7.7$  Hz, 1 H), 2.11 (q,  $J = 7.2$  Hz, 2 H), 1.97–1.90 (m, 1 H), 1.68–1.57 (m, 2 H), 1.39 (d,  $J = 13.7$  Hz, 1 H), 0.90 (s, 9 H), 0.90 (s, 9 H), 0.89 (s, 9 H), 0.07 (s, 6 H), 0.06 (s, 6 H), 0.04 (s, 6 H);  $^{13}\text{C}$  NMR (100 MHz,  $\text{CDCl}_3$ )  $\delta$  147.9, 131.9, 131.2, 113.8, 80.2, 75.7, 69.4, 69.1, 64.6, 62.6, 60.4, 39.0, 34.0, 32.4, 28.6, 26.0, 25.8, 18.4, 18.1, 18.0, -4.6, -4.7, -4.8, -5.2; HRMS (ESI-TOF) calcd for  $\text{C}_{33}\text{H}_{68}\text{O}_6\text{Si}_3\text{Na}$  [ $\text{M} + \text{Na}$ ] $^+$  667.4221 found 667.4220. Diol **17**: colorless oil;  $R_f = 0.51$  (hexane/EtOAc = 2:1);  $[\alpha]_{\text{D}}^{21} +15.3$  ( $c$  1.07,  $\text{CHCl}_3$ ); IR (neat) 3409, 2955, 2929, 2894, 2857  $\text{cm}^{-1}$ ;  $^1\text{H}$  NMR (400 MHz,  $\text{CDCl}_3$ )  $\delta$  5.71 (dt,  $J = 15.4, 6.8$  Hz, 1 H), 5.49 (dd,  $J = 15.4, 6.1$  Hz, 1 H), 5.14 (s, 1 H), 4.95 (s, 1 H), 4.54 (d,  $J = 6.1$  Hz, 1 H), 4.19 (dd,  $J = 11.8, 9.7$  Hz, 1 H), 4.02 (t,  $J = 8.3$  Hz, 1 H), 3.84 (d,  $J = 9.5$  Hz, 1 H), 3.79 (d,  $J = 2.9$  Hz, 1 H) 3.61 (t,  $J = 6.4$  Hz, 2 H), 3.43–3.34 (m, 3 H), 2.35 (dd,  $J = 14.4, 9.0$  Hz, 1 H), 2.22 (brs, 1 H), 2.14–2.08 (m, 3 H), 1.96–1.89 (m, 1 H), 1.64–1.57 (m, 2 H), 1.44 (d,  $J = 13.7$  Hz, 1 H), 0.90 (s, 9 H), 0.89 (s, 9 H), 0.89 (s, 9 H), 0.07 (s, 6 H), 0.06 (s, 6 H), 0.04 (s, 6 H);  $^{13}\text{C}$  NMR (100 MHz,  $\text{CDCl}_3$ )  $\delta$  148.5, 131.5, 131.5, 113.6, 80.3, 75.8, 69.5, 69.0, 65.8, 62.6, 60.2, 37.9, 34.5, 32.4, 28.6, 26.0, 25.8, 18.4, 18.1, 18.0, -4.6, -4.7, -4.8, -5.2; HRMS (ESI-TOF) calcd for  $\text{C}_{33}\text{H}_{68}\text{O}_6\text{Si}_3\text{Na}$  [ $\text{M} + \text{Na}$ ] $^+$  667.4221, found 667.4216.

**Stereochemical Determination of 17.** The primary hydroxy group of diol **17** was selectively protected with PivCl/ $\text{Et}_3\text{N}$ /DMAP to give pivalate **S2** (Scheme S1). The absolute configuration at the C66 position of **S2** was determined by the modified Mosher method.<sup>1</sup> Thus, treatment of



alcohol **S2** with MTPACl/Et<sub>3</sub>N/DMAP provided (*S*)-MTPA ester **S3** and (*R*)-MTPA ester **S4**, respectively. The results for calculating the chemical shift differences ( $\Delta\delta_{S-R}$ ) of **S3** and **S4** are described in Figure S1. The signs at the left side of the C66 position were positive and those at the right side of the C66 position showed negative. Therefore, the absolute stereochemistry at the C66 position of **17** was determined as shown in Scheme S1.

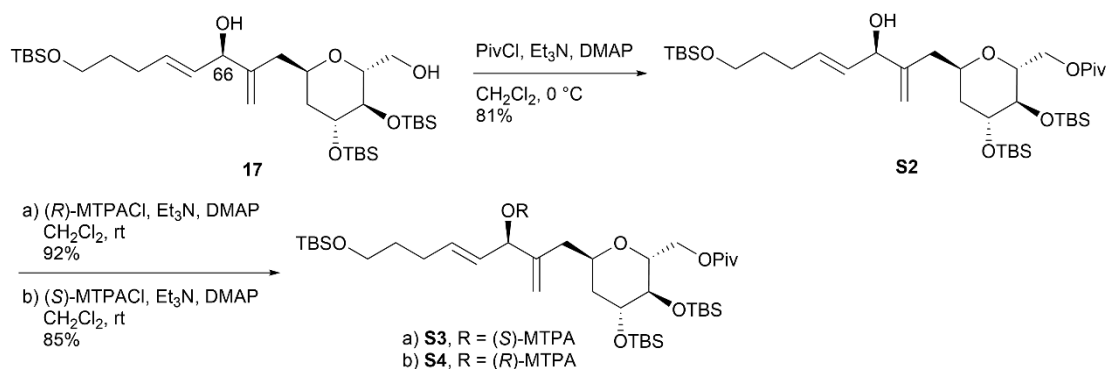

**Scheme S1.** Transformation of diol **17** for its stereochemical determination. MTPA =  $\alpha$ -methoxy- $\alpha$ -(trifluoromethyl)phenylacetyl).

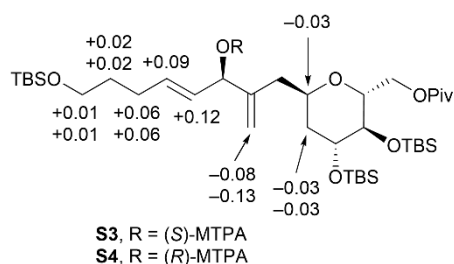

**Figure S1.** Chemical shift differences ( $\Delta\delta_{S-R}$ ) of MTPA esters **S3** and **S4**.

**Pivalate S2.** To a solution of diol **17** (10.0 mg, 15.5  $\mu$ mol) in CH<sub>2</sub>Cl<sub>2</sub> (1.0 mL) were added DMAP (0.2 mg, 1.55  $\mu$ mol), Et<sub>3</sub>N (8.7  $\mu$ L, 62.0  $\mu$ mol), and PivCl (2.3  $\mu$ L, 18.6  $\mu$ mol) at 0 °C. The mixture was stirred at the same temperature for 30 min. To the mixture were added Et<sub>3</sub>N (17  $\mu$ L, 0.124 mmol) and PivCl (4.6  $\mu$ L, 37.2  $\mu$ mol) at 0 °C. The mixture was stirred at the same temperature for 30 min. To the mixture were added Et<sub>3</sub>N (26  $\mu$ L, 0.186 mmol) and PivCl (6.9  $\mu$ L, 55.8  $\mu$ mol) at 0 °C. The mixture was stirred at the same temperature for 2 h. The reaction was quenched with saturated aqueous NH<sub>4</sub>Cl. The mixture was diluted with EtOAc, washed with H<sub>2</sub>O and brine, and then dried over Na<sub>2</sub>SO<sub>4</sub>. Concentration and column chromatography (hexane/EtOAc = 15:1) gave pivalate **S2** (9.1 mg, 81%): colorless oil;  $R_f$  = 0.54 (hexane/EtOAc = 7:1);  $[\alpha]_D^{22}$  +20.3 ( $c$  0.41, CHCl<sub>3</sub>); IR (neat) 3442, 2954, 2929, 2892, 2857, 1733 cm<sup>-1</sup>; <sup>1</sup>H NMR (400 MHz, CDCl<sub>3</sub>)  $\delta$  5.69 (dt,  $J$  = 15.2, 6.8 Hz, 1 H), 5.47 (dd,  $J$  = 15.2, 6.2 Hz, 1 H), 5.08 (s, 1 H), 4.93 (s, 1 H), 4.70 (dd,  $J$  = 11.4, 8.5 Hz, 1 H), 4.52 (d,  $J$  = 6.2 Hz, 1 H), 4.06–4.02 (m, 2 H), 3.96–3.92 (m, 1 H), 3.81 (brs, 1 H), 3.61 (t,  $J$  = 6.4 Hz, 2 H), 3.53 (brs, 1 H),

3.46 (d,  $J = 3.0$  Hz, 1 H), 2.31 (dd,  $J = 11.4, 8.5$  Hz, 1 H), 2.11–2.07 (m, 3 H), 1.91 (t,  $J = 11.4$  Hz, 1 H), 1.64–1.57 (m, 2 H), 1.40 (d,  $J = 13.1$  Hz, 1 H), 1.21 (s, 9 H), 0.91 (s, 9 H), 0.90 (s, 9 H), 0.89 (s, 9 H), 0.08 (s, 6 H), 0.07 (s, 6 H), 0.04 (s, 6 H);  $^{13}\text{C}$  NMR (100 MHz,  $\text{CDCl}_3$ )  $\delta$  178.2, 148.3, 131.6, 131.2, 113.2, 77.7, 75.4, 69.3, 68.5, 65.4, 62.6, 61.8, 38.8, 38.3, 34.0, 32.4, 28.6, 27.3, 26.0, 25.8, 18.4, 18.1, 18.0,  $-4.7, -4.7, -4.8, -5.2$ ; HRMS (ESI-TOF) calcd for  $\text{C}_{38}\text{H}_{76}\text{O}_7\text{Si}_3\text{Na}$   $[\text{M} + \text{Na}]^+$  751.4797, found 751.4792.

**(S)-MTPA Ester S3.** To a solution of alcohol **S2** (5.2 mg, 7.13  $\mu\text{mol}$ ) in  $\text{CH}_2\text{Cl}_2$  (0.2 mL) were added DMAP (1.7 mg, 14.3  $\mu\text{mol}$ ),  $\text{Et}_3\text{N}$  (1.4  $\mu\text{L}$ , 9.98  $\mu\text{mol}$ ), and (*R*)-MTPACl (1.6  $\mu\text{L}$ , 8.56  $\mu\text{mol}$ ) at room temperature. The mixture was stirred at the same temperature for 1 h. The reaction was quenched with saturated aqueous  $\text{NH}_4\text{Cl}$ . The mixture was diluted with EtOAc, washed with  $\text{H}_2\text{O}$  and brine, and then dried over  $\text{Na}_2\text{SO}_4$ . Concentration and column chromatography (hexane/EtOAc = 40:1) gave (*S*)-MTPA ester **S3** (6.2 mg, 92%): yellow oil;  $R_f = 0.46$  (hexane/EtOAc = 10:1);  $[\alpha]_{\text{D}}^{22} -11.7$  ( $c$  0.31,  $\text{CHCl}_3$ ); IR (neat) 2952, 2928, 2857, 1748, 1734  $\text{cm}^{-1}$ ;  $^1\text{H}$  NMR (400 MHz,  $\text{CDCl}_3$ )  $\delta$  7.54–7.51 (m, 2 H), 7.39–7.36 (m, 3 H), 5.91–5.82 (m, 2 H), 5.47 (dd,  $J = 15.1, 7.8$  Hz, 1 H), 5.06 (s, 1 H), 5.04 (s, 1 H), 4.52 (dd,  $J = 11.4, 8.1$  Hz, 1 H), 4.23 (dd,  $J = 11.4, 5.8$  Hz, 1 H), 4.09–4.02 (m, 1 H), 3.91 (t,  $J = 6.7$  Hz, 1 H), 3.81 (d,  $J = 2.7$  Hz, 1 H), 3.59 (t,  $J = 6.4$  Hz, 2 H), 3.56 (s, 3 H), 3.50 (d,  $J = 3.4$  Hz, 2 H), 2.20–2.10 (m, 3 H), 1.94 (dd,  $J = 15.5, 5.3$  Hz, 1 H), 1.86–1.79 (m, 1 H), 1.62–1.55 (m, 2 H), 1.38 (d,  $J = 13.6$  Hz, 1 H), 1.20 (s, 9 H), 0.91 (s, 9 H), 0.90 (s, 9 H), 0.89 (s, 9 H), 0.08 (s, 6 H), 0.07 (s, 3 H), 0.06 (s, 3 H), 0.04 (s, 6 H);  $^{13}\text{C}$  NMR (100 MHz,  $\text{CDCl}_3$ )  $\delta$  178.0, 165.1, 142.5, 137.0, 132.5, 129.4, 128.2, 127.4, 125.8, 113.4, 79.5, 69.4, 68.5, 63.9, 62.4, 55.5, 38.8, 38.0, 33.7, 32.1, 29.8, 28.6, 27.3, 26.0, 25.9, 25.8, 18.4, 18.1, 18.0,  $-4.7, -4.7, -4.8, -5.2$ ; HRMS (ESI-TOF) calcd for  $\text{C}_{48}\text{H}_{83}\text{F}_3\text{O}_9\text{Si}_3\text{Na}$   $[\text{M} + \text{Na}]^+$  967.5195, found 967.5191.

**(R)-MTPA Ester S4.** To a solution of alcohol **S2** (6.0 mg, 8.23  $\mu\text{mol}$ ) in  $\text{CH}_2\text{Cl}_2$  (0.2 mL) were added DMAP (2.0 mg, 16.5  $\mu\text{mol}$ ),  $\text{Et}_3\text{N}$  (1.6  $\mu\text{L}$ , 11.5  $\mu\text{mol}$ ), and (*S*)-MTPACl (1.8  $\mu\text{L}$ , 9.88  $\mu\text{mol}$ ) at room temperature. The mixture was stirred at the same temperature for 1 h. To the mixture were added  $\text{Et}_3\text{N}$  (1.6  $\mu\text{L}$ , 11.5  $\mu\text{mol}$ ) and (*S*)-MTPACl (1.8  $\mu\text{L}$ , 9.88  $\mu\text{mol}$ ) at room temperature. The mixture was stirred at the same temperature for 10 min. The reaction was quenched with saturated aqueous  $\text{NH}_4\text{Cl}$ . The mixture was diluted with EtOAc, washed with  $\text{H}_2\text{O}$  and brine, and then dried over  $\text{Na}_2\text{SO}_4$ . Concentration and column chromatography (hexane/EtOAc = 40:1) gave (*R*)-MTPA ester **S4** (6.6 mg, 85%): yellow oil;  $R_f = 0.45$  (hexane/EtOAc = 10:1);  $[\alpha]_{\text{D}}^{21} +11.7$  ( $c$  0.33,  $\text{CHCl}_3$ ); IR (neat) 2954, 2929, 2857, 1748, 1733  $\text{cm}^{-1}$ ;  $^1\text{H}$  NMR (400 MHz,  $\text{CDCl}_3$ )  $\delta$  7.51–7.49 (m, 2 H), 7.38–7.37 (m, 3 H), 5.85 (d,  $J = 7.4$  Hz, 1 H), 5.78 (dt,  $J = 15.2, 6.6$  Hz, 1 H), 5.35 (dd,  $J = 15.2, 7.4$  Hz, 1 H), 5.19 (s, 1 H), 5.13 (s, 1 H), 4.54 (dd,  $J = 11.4, 8.2$  Hz, 1 H), 4.24 (dd,  $J = 11.4, 5.5$  Hz, 1 H), 4.09 (brs, 1 H), 3.92 (t,  $J = 6.9$  Hz, 1 H), 3.81 (s, 1 H), 3.58 (t,  $J = 6.1$  Hz, 2 H), 3.55 (s, 3 H), 3.50 (s, 2 H), 2.29 (dd,

$J = 15.1, 7.3$  Hz, 1 H), 2.11–2.02 (m, 3 H), 1.86 (t,  $J = 12.2$  Hz, 1 H), 1.59–1.52 (m, 2 H), 1.39 (d,  $J = 14.0$  Hz, 1 H), 1.21 (s, 9 H), 0.90 (s, 9 H), 0.90 (s, 9 H), 0.89 (s, 9 H), 0.07 (s, 6 H), 0.07 (s, 3 H), 0.06 (s, 3 H), 0.04 (s, 6 H);  $^{13}\text{C}$  NMR (100 MHz,  $\text{CDCl}_3$ )  $\delta$  178.1, 165.2, 142.5, 136.3, 132.4, 129.4, 128.2, 127.5, 125.6, 114.0, 79.5, 69.4, 68.5, 63.9, 62.4, 55.6, 39.2, 38.8, 38.0, 33.8, 32.1, 28.6, 27.3, 26.0, 25.9, 25.8, 18.4, 18.1, 18.0, –4.7, –4.7, –4.8, –4.8, –5.2; HRMS (ESI–TOF) calcd for  $\text{C}_{48}\text{H}_{83}\text{F}_3\text{O}_9\text{Si}_3\text{Na}$  [ $\text{M} + \text{Na}$ ] $^+$  967.5195, found 967.5192.

**Tetrakis-TBS Ether 19.** To a solution of allylic alcohol **16** (56.4 mg, 87.4  $\mu\text{mol}$ ) in acetone (1.5 mL) and  $\text{H}_2\text{O}$  (0.3 mL) were added NMO (20.5 mg, 0.175 mmol) and  $\text{OsO}_4$  (0.05 M in 2-propanol, 87  $\mu\text{L}$ , 4.37  $\mu\text{mol}$ ) at 0  $^\circ\text{C}$ . The mixture was stirred at room temperature for 1 h. The reaction was quenched with saturated aqueous  $\text{Na}_2\text{S}_2\text{O}_3$ . The mixture was diluted with EtOAc, washed with  $\text{H}_2\text{O}$  and brine, and then dried over  $\text{Na}_2\text{SO}_4$ . Concentration and column chromatography (hexane/EtOAc = 6:1, 1:1) gave tetraol **18** (19.8 mg) and allylic alcohol **16** (7.2 mg, 13% recovery). Tetraol **18** was used for the next step without further purification.

To a solution of tetraol **18** obtained above (19.8 mg) in  $\text{CH}_2\text{Cl}_2$  (1.0 mL) were added imidazole (5.9 mg, 87.3  $\mu\text{mol}$ ) and TBSCl (10.5 mg, 69.8  $\mu\text{mol}$ ) at 0  $^\circ\text{C}$ . The mixture was stirred at the same temperature for 1 h. To the mixture were added imidazole (5.9 mg, 87.3  $\mu\text{mol}$ ) and TBSCl (10.5 mg, 69.8  $\mu\text{mol}$ ) at 0  $^\circ\text{C}$ . The mixture was stirred at the same temperature for 1 h., To the mixture were added imidazole (5.9 mg, 87.3  $\mu\text{mol}$ ) and TBSCl (10.5 mg, 69.8  $\mu\text{mol}$ ) at 0  $^\circ\text{C}$ . The mixture was stirred at the same temperature for 30 min. The reaction was quenched with saturated aqueous  $\text{NH}_4\text{Cl}$ . The mixture was diluted with EtOAc, washed with  $\text{H}_2\text{O}$  and brine, and then dried over  $\text{Na}_2\text{SO}_4$ . Concentration and column chromatography (hexane/EtOAc = 5:1) gave tetrakis-TBS ether **19** (16.1 mg, 23% in two steps): colorless oil;  $R_f = 0.49$  (hexane/EtOAc = 2:1);  $[\alpha]_{\text{D}}^{22} +2.3$  ( $c$  0.81,  $\text{CHCl}_3$ ); IR (neat) 3410, 2956, 2929, 2889, 2858, 1645  $\text{cm}^{-1}$ ;  $^1\text{H}$  NMR (400 MHz,  $\text{CDCl}_3$ )  $\delta$  5.20 (s, 1 H), 5.07 (s, 1 H), 4.23 (dd,  $J = 6.6, 4.2$  Hz, 1 H), 4.07–4.01 (m, 1 H), 4.02 (dd,  $J = 10.1, 7.7$  Hz, 1 H), 3.93 (d,  $J = 4.4$  Hz, 1 H), 3.87–3.86 (m, 1 H), 3.80–3.74 (m, 2 H), 3.72–3.63 (m, 3 H), 3.56–3.48 (m, 3 H), 3.01 (d,  $J = 6.6$  Hz, 1 H), 2.37 (dd,  $J = 14.4, 3.9$  Hz, 1 H), 2.22 (dd,  $J = 14.4, 7.1$  Hz, 1 H), 1.98–1.94 (m, 1 H), 1.69–1.64 (m, 4 H), 1.32 (d,  $J = 13.6$  Hz, 1 H), 0.90 (s, 9 H), 0.90 (s, 9 H), 0.89 (s, 9 H), 0.88 (s, 9 H), 0.07 (s, 6 H), 0.07 (s, 6 H), 0.04 (s, 6 H), 0.04 (s, 6 H);  $^{13}\text{C}$  NMR (100 MHz,  $\text{CDCl}_3$ )  $\delta$  145.8, 116.2, 80.6, 77.2, 72.9, 71.2, 69.4, 67.9, 65.0, 63.6, 61.0, 37.7, 33.5, 30.9, 29.5, 26.0, 25.9, 25.8, 18.4, 18.0, –4.7, –4.8, –4.9, –5.2, –5.3; HRMS (ESI–TOF) calcd for  $\text{C}_{39}\text{H}_{84}\text{O}_8\text{Si}_4\text{Na}$  [ $\text{M} + \text{Na}$ ] $^+$  815.5141, found 815.5140.

**Stereochemical Determination of 18.** The purified tetraol **18** was treated with  $p$ -MeOC<sub>6</sub>H<sub>4</sub>CH(OMe)<sub>2</sub>/PPTS/MS5Å to give  $p$ -methoxybenzylidene acetal **S5** in 58% yield (Scheme S2). The observed coupling constant ( $^3J_{65,66} = 8.0$  Hz) in **S5** indicates that H-65 and H-66 possess the axial-axial relationship, and the C65 hydroxy group is arranged in the

equatorial position. The C64 stereochemistry was determined based on the *syn*-addition reaction mechanism of OsO<sub>4</sub>-catalyzed dihydroxylation. The stereochemistry at the acetal carbon of **S5** was elucidated by the NOE correlations as shown in arrows.

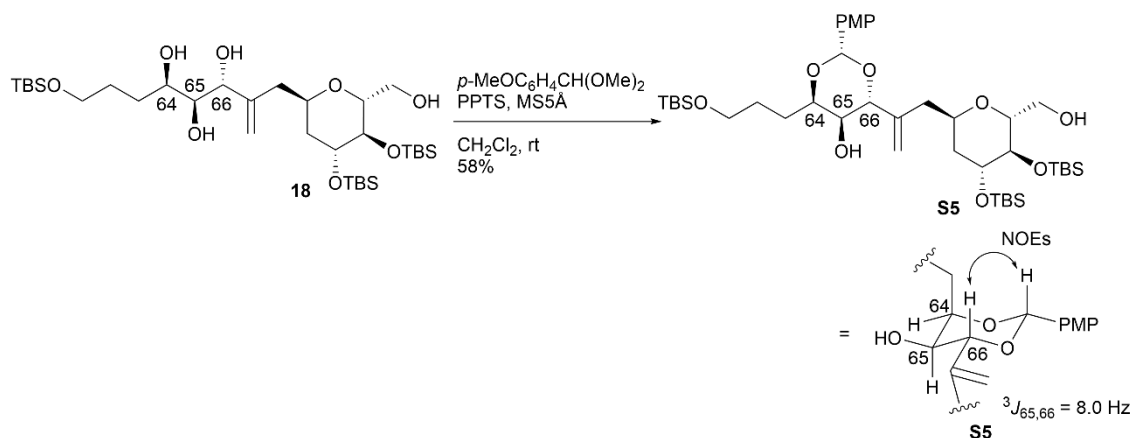

**Scheme S2.** Stereochemical determination of tetraol **18**.

***p*-Methoxybenzylidene Acetal S5.** To a solution of tetraol **18** (14.8 mg, 21.8 μmol) in CH<sub>2</sub>Cl<sub>2</sub> (1.0 mL) were added MS5Å (21.8 mg), *p*-MeOC<sub>6</sub>H<sub>4</sub>CH(OMe)<sub>2</sub> (5.6 μL, 32.7 μmol), and PPTS (0.5 mg, 2.18 μmol) at room temperature. The mixture was stirred at the same temperature for 4 h. The reaction was quenched with Et<sub>3</sub>N. The mixture was diluted with EtOAc, washed with H<sub>2</sub>O and brine, and then dried over Na<sub>2</sub>SO<sub>4</sub>. Concentration and column chromatography (hexane/EtOAc = 4:1) gave *p*-methoxybenzylidene acetal **S5** (7.7 mg, 58%): colorless oil; *R*<sub>f</sub> = 0.55 (hexane/EtOAc = 2:1); [α]<sub>D</sub><sup>21</sup> +3.5 (*c* 0.25, CHCl<sub>3</sub>); IR (neat) 3436, 2953, 2928, 2896, 2885, 2857, 1616 cm<sup>-1</sup>; <sup>1</sup>H NMR (400 MHz, CDCl<sub>3</sub>) δ 7.40 (d, *J* = 8.8 Hz, 2 H), 6.88 (d, *J* = 8.8 Hz, 2 H), 5.84 (s, 1 H), 5.29 (s, 1 H), 5.07 (s, 1 H), 4.30–4.22 (m, 3 H), 4.20–4.12 (m, 3 H), 3.93 (t, *J* = 6.9 Hz, 1 H), 3.80 (s, 3 H), 3.70 (d, *J* = 6.3 Hz, 1 H), 3.65 (t, *J* = 5.9 Hz, 2 H), 3.46 (d, *J* = 12.4 Hz, 1 H), 3.36 (s, 1 H), 2.51 (dd, *J* = 14.4, 4.1 Hz, 1 H), 2.24 (dd, *J* = 14.4, 6.7 Hz, 1 H), 2.02 (t, *J* = 13.4 Hz, 1 H), 1.83–1.76 (m, 2 H), 1.73–1.66 (m, 2 H), 1.35 (d, *J* = 13.1 Hz, 1 H), 0.90 (s, 9 H), 0.90 (s, 9 H), 0.90 (s, 9 H), 0.07 (s, 6 H), 0.07 (s, 6 H), 0.05 (s, 6 H); <sup>13</sup>C NMR (100 MHz, CDCl<sub>3</sub>) δ 160.3, 145.3, 130.2, 128.1, 116.6, 113.6, 103.2, 81.4, 80.6, 80.1, 75.0, 69.2, 68.9, 64.9, 63.2, 60.4, 55.3, 39.4, 33.5, 30.6, 29.3, 26.1, 25.8, 18.4, 18.1, 18.0, -4.6, -4.8, -4.8, -5.2; HRMS (ESI-TOF) calcd for C<sub>41</sub>H<sub>76</sub>O<sub>9</sub>Si<sub>3</sub>Na [M + Na]<sup>+</sup> 819.4695, found 819.4696.

**Candidate Compound 3a from 19.** To a solution of tetrakis-TBS ether **19** (10.9 mg, 13.7 μmol) in MeOH (1.2 mL) was added 1.0 M aqueous HCl (0.14 mL, 0.140 mmol) at room temperature. The mixture was stirred at the same temperature for 2 h. To the mixture was added 1.0 M aqueous HCl (0.14 mL, 0.140 mmol) at room temperature. The mixture was stirred at the

same temperature for 1 h. To the mixture was added 1.0 M aqueous HCl (0.28 mL, 0.280 mmol) at room temperature. The mixture was stirred at the same temperature for 1 h. The mixture was diluted with MeOH. Concentration and column chromatography (CH<sub>2</sub>Cl<sub>2</sub>/MeOH = 4:1) gave candidate compound **3a** (4.6 mg, quant): colorless oil;  $R_f = 0.42$  (CH<sub>2</sub>Cl<sub>2</sub>/MeOH = 2:1);  $[\alpha]_D^{21} +35.2$  ( $c$  0.29, CH<sub>3</sub>OH); IR (neat) 3405, 2920, 2850 cm<sup>-1</sup>; <sup>1</sup>H NMR (600 MHz, CD<sub>3</sub>OD)  $\delta$  5.21 (s, 1 H), 5.11 (s, 1 H), 4.25–4.23 (m, 1 H), 4.20–4.18 (m, 1 H), 3.85 (brs, 1 H), 3.81–3.78 (m, 1 H), 3.76 (dd,  $J = 11.7, 2.7$  Hz, 1 H), 3.70 (dd,  $J = 11.7, 6.0$  Hz, 1 H), 3.58 (t,  $J = 6.0$  Hz, 2 H), 3.53 (ddd,  $J = 8.1, 6.0, 2.7$  Hz, 1 H), 3.42–3.40 (m, 1 H), 3.21 (t,  $J = 8.1$  Hz, 1 H), 2.55 (dd,  $J = 15.0, 9.0$  Hz, 1 H), 2.36 (dd,  $J = 15.0, 6.0$  Hz, 1 H), 2.00–1.97 (m, 1 H), 1.74–1.57 (m, 5 H); <sup>13</sup>C NMR (150 MHz, CD<sub>3</sub>OD)  $\delta$  148.6, 115.1, 76.7, 76.0, 74.7, 73.3, 72.5, 71.4, 70.0, 63.1, 63.0, 36.7, 35.1, 31.4, 30.2; HRMS (ESI–TOF) calcd for C<sub>15</sub>H<sub>28</sub>O<sub>8</sub>Na [M + Na]<sup>+</sup> 359.1682, found 359.1678.

**Tetraol 20.** To a solution of allylic alcohol **17** (75.0 mg, 0.116 mmol) in acetone (1.9 mL) and H<sub>2</sub>O (0.4 mL) were added NMO (27.2 mg, 0.232 mmol) and OsO<sub>4</sub> (0.05 M in 2-propanol, 0.12 mL, 5.80  $\mu$ mol) at 0 °C. The mixture was stirred at room temperature for 3 h. The reaction was quenched with saturated aqueous Na<sub>2</sub>S<sub>2</sub>O<sub>3</sub>. The mixture was diluted with EtOAc, washed with H<sub>2</sub>O and brine, and then dried over Na<sub>2</sub>SO<sub>4</sub>. Concentration and column chromatography (hexane/EtOAc = 4:1, 1:1) gave tetraol **20** (37.9 mg, 24%) and allylic alcohol **17** (24.3 mg, 33% recovery). Tetraol **20**: colorless oil;  $R_f = 0.50$  (hexane/EtOAc = 1:2);  $[\alpha]_D^{22} +8.8$  ( $c$  0.39, CHCl<sub>3</sub>); IR (neat) 3398, 2952, 2928, 2889, 2857, 1644 cm<sup>-1</sup>; <sup>1</sup>H NMR (400 MHz, CDCl<sub>3</sub>)  $\delta$  5.22 (s, 1 H), 5.13 (s, 1 H), 4.23–4.16 (m, 2 H), 4.12 (s, 1 H), 4.08–4.01 (m, 1 H), 3.88–3.79 (m, 3 H), 3.72–3.60 (m, 3 H), 3.46–3.41 (m, 2 H), 3.35 (d,  $J = 3.2$  Hz, 1 H), 2.59 (d,  $J = 6.8$  Hz, 1 H), 2.38 (dd,  $J = 14.4, 9.5$  Hz, 1 H), 2.27 (brs, 1 H), 2.22 (dd,  $J = 14.4, 3.1$  Hz, 1 H), 1.96–1.90 (m, 1 H), 1.69–1.63 (m, 3 H), 1.46 (d,  $J = 13.1$  Hz, 1 H), 0.90 (s, 9 H), 0.90 (s, 9 H), 0.89 (s, 9 H), 0.07 (s, 6 H), 0.06 (s, 6 H), 0.06 (s, 6 H); <sup>13</sup>C NMR (100 MHz, CDCl<sub>3</sub>)  $\delta$  146.9, 115.6, 80.5, 76.8, 73.9, 70.6, 69.3, 69.0, 66.2, 63.6, 60.3, 38.1, 34.5, 31.3, 29.5, 26.0, 25.8, 25.8, 18.4, 18.1, 18.0, –4.6, –4.7, –4.8, –5.2, –5.3; HRMS (ESI–TOF) calcd for C<sub>33</sub>H<sub>70</sub>O<sub>8</sub>Si<sub>3</sub>Na [M + Na]<sup>+</sup> 701.4276, found 701.4273.

**Stereochemical Determination of 20.** Tetraol **20** was treated with *p*-MeOC<sub>6</sub>H<sub>4</sub>CH(OMe)<sub>2</sub>/PPTS/MS5Å to give *p*-methoxybenzylidene acetal **S6** in 54% yield (Scheme S3). The observed coupling constant (<sup>3</sup> $J_{65,66} = 7.6$  Hz) in **S6** indicates that H-65 and H-66 possess the axial-axial relationship, and the C65 hydroxy group is arranged in the equatorial position. The C64 stereochemistry was determined based on the *syn*-addition reaction mechanism of OsO<sub>4</sub>-catalyzed dihydroxylation. The stereochemistry at the acetal carbon of **S6** was elucidated by the NOE correlations as shown in arrows.

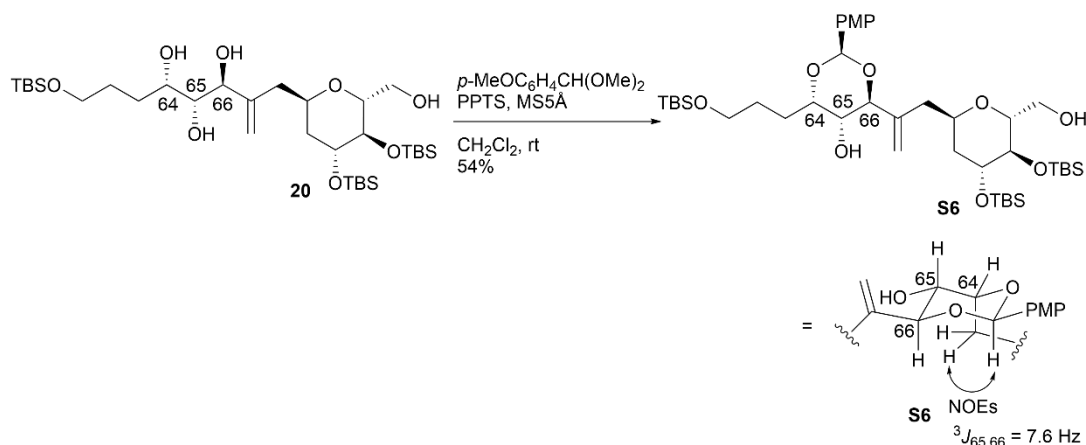

**Scheme S3.** Stereochemical determination of tetraol **20**.

***p*-Methoxybenzylidene Acetal **S6**.** To a solution of tetraol **20** (21.4 mg, 31.5  $\mu\text{mol}$ ) in  $\text{CH}_2\text{Cl}_2$  (1.0 mL) were added  $\text{MS5A}$  (35.1 mg), *p*- $\text{MeOC}_6\text{H}_4\text{CH(OMe)}_2$  (8.1  $\mu\text{L}$ , 47.3  $\mu\text{mol}$ ), and PPTS (0.8 mg, 3.15  $\mu\text{mol}$ ) at room temperature. The mixture was stirred at the same temperature for 3 h. The reaction was quenched with  $\text{Et}_3\text{N}$ . The mixture was diluted with  $\text{EtOAc}$ , washed with  $\text{H}_2\text{O}$  and brine, and then dried over  $\text{Na}_2\text{SO}_4$ . Concentration and column chromatography (hexane/ $\text{EtOAc}$  = 4:1) gave *p*-methoxybenzylidene acetal **S6** (13.6 mg, 54%): colorless oil;  $R_f$  = 0.51 (hexane/ $\text{EtOAc}$  = 2:1);  $[\alpha]_{\text{D}}^{22} +1.2$  ( $c$  0.34,  $\text{CHCl}_3$ ); IR (neat) 3434, 2952, 2928, 2889, 2857, 1639  $\text{cm}^{-1}$ ;  $^1\text{H}$  NMR (400 MHz,  $\text{CDCl}_3$ )  $\delta$  7.38 (d,  $J$  = 8.6 Hz, 2 H), 6.88 (d,  $J$  = 8.6 Hz, 2 H), 5.85 (s, 1 H), 5.23 (s, 1 H), 5.09 (s, 1 H), 4.30–4.26 (m, 1 H), 4.20 (dd,  $J$  = 11.8, 9.9 Hz, 1 H), 4.11 (d,  $J$  = 6.6 Hz, 1 H), 4.02–3.97 (m, 2 H), 3.87–3.82 (m, 3 H), 3.80 (s, 3 H), 3.67 (t,  $J$  = 5.8 Hz, 2 H), 3.41 (d,  $J$  = 11.5 Hz, 1 H), 3.35 (d,  $J$  = 2.9 Hz, 1 H), 2.41 (dd,  $J$  = 14.1, 9.3 Hz, 1 H), 2.20 (dd,  $J$  = 14.1, 2.8 Hz, 1 H), 2.11 (brs, 1 H), 1.98–1.91 (m, 1 H), 1.83–1.65 (m, 4 H), 1.44 (d,  $J$  = 13.9 Hz, 1 H), 0.90 (s, 9 H), 0.90 (s, 9 H), 0.90 (s, 9 H), 0.07 (s, 6 H), 0.06 (s, 6 H), 0.06 (s, 6 H);  $^{13}\text{C}$  NMR (100 MHz,  $\text{CDCl}_3$ )  $\delta$  160.3, 145.8, 130.1, 128.1, 116.7, 113.7, 102.5, 82.6, 80.6, 79.6, 76.0, 69.3, 68.9, 66.3, 63.0, 60.2, 55.3, 38.3, 34.4, 30.2, 29.3, 26.1, 25.8, 25.8, 18.4, 18.1, 18.0,  $-4.6$ ,  $-4.7$ ,  $-4.8$ ,  $-5.1$ ; HRMS (ESI-TOF) calcd for  $\text{C}_{41}\text{H}_{76}\text{O}_9\text{Si}_3\text{Na}$   $[\text{M} + \text{Na}]^+$  819.4695, found 819.4691.

**Candidate Compound **3b** from **20**.** To a solution of tris-TBS ether **20** (11.0 mg, 16.2  $\mu\text{mol}$ ) in  $\text{MeOH}$  (1.5 mL) was added 1.0 M aqueous  $\text{HCl}$  (0.16 mL, 0.160 mmol) at room temperature. The mixture was stirred at the same temperature for 30 min. To the mixture was added 1.0 M aqueous  $\text{HCl}$  (0.32 mL, 0.320 mmol) at room temperature. The mixture was stirred at the same temperature for 30 min. To the mixture was added 1.0 M aqueous  $\text{HCl}$  (0.32 mL, 0.320 mmol) at room temperature. The mixture was stirred at the same temperature for 3 h. The mixture was diluted with  $\text{MeOH}$ . Concentration and column chromatography ( $\text{CH}_2\text{Cl}_2/\text{MeOH}$  = 4:1) gave candidate compound **3b** (5.4 mg, 99%): colorless oil;  $R_f$  = 0.46 ( $\text{CH}_2\text{Cl}_2/\text{MeOH}$  = 2:1);  $[\alpha]_{\text{D}}^{23}$

+23.4 (*c* 0.36, CH<sub>3</sub>OH); <sup>1</sup>H NMR (600 MHz, CD<sub>3</sub>OD)  $\delta$  5.18 (s, 1 H), 5.09 (s, 1 H), 4.29–4.28 (m, 1 H), 4.20 (d, *J* = 7.8 Hz, 1 H), 3.85 (brs, 1 H), 3.81–3.79 (m, 1 H), 3.77 (dd, *J* = 11.7, 2.4 Hz, 1 H), 3.65 (dd, *J* = 11.7, 6.3 Hz, 1 H), 3.58 (t, *J* = 5.7 Hz, 2 H), 3.53 (ddd, *J* = 8.4, 6.3, 2.4 Hz, 1 H), 3.41 (brs, 1 H), 3.12 (t, *J* = 8.4 Hz, 1 H), 2.65 (dd, *J* = 14.4, 9.0 Hz, 1 H), 2.32 (dd, *J* = 14.4, 5.4 Hz, 1 H), 1.97–1.94 (m, 1 H), 1.72–1.57 (m, 5 H); <sup>13</sup>C NMR (150 MHz, CD<sub>3</sub>OD)  $\delta$  148.0, 115.6, 76.5, 75.6, 75.0, 73.5, 71.8, 71.4, 70.1, 63.2, 63.1, 36.8, 35.7, 31.4, 30.3; HRMS (ESI–TOF) calcd for C<sub>15</sub>H<sub>28</sub>O<sub>8</sub>Na [M + Na]<sup>+</sup> 359.1682, found 359.1678.

**Alcohol 21.** To a solution of diol **16** (85.6 mg, 0.133 mmol) in CH<sub>2</sub>Cl<sub>2</sub> (1.3 mL) were added DMAP (3.2 mg, 26.6  $\mu$ mol), imidazole (27.2 mg, 0.399 mmol), and TBSCl (48.1 mg, 0.319 mmol) at room temperature. The mixture was stirred at the same temperature for 1 h. To the mixture were added imidazole (27.2 mg, 0.399 mmol) and TBSCl (48.1 mg, 0.319 mmol) at room temperature. The mixture was stirred at the same temperature for 30 min. The reaction was quenched with saturated aqueous NH<sub>4</sub>Cl. The mixture was diluted with EtOAc, washed with H<sub>2</sub>O and brine, and then dried over Na<sub>2</sub>SO<sub>4</sub>. Concentration and short column chromatography (hexane, hexane/EtOAc = 70:1) gave the corresponding pentakis-TBS ether (110 mg), which was used for the next step without further purification.

A mixture of the alkene obtained above (110 mg) and 9-BBN (88.6 mg, 0.726 mmol) in THF (1.2 mL) was stirred at 50 °C for 1 h. To the mixture were added 3.0 M aqueous NaOH (1.0 mL, 3.00 mmol) and 30% aqueous H<sub>2</sub>O<sub>2</sub> (1.0 mL, 9.75 mmol) at 0 °C. The mixture was stirred at room temperature for 1 h. The mixture was diluted with EtOAc, washed with H<sub>2</sub>O and brine, and then dried over Na<sub>2</sub>SO<sub>4</sub>. Concentration and column chromatography (hexane/EtOAc = 20:1) gave alcohol **21** (90.4 mg, 76% in two steps): colorless oil; *R<sub>f</sub>* = 0.49 (hexane/EtOAc = 10:1); [ $\alpha$ ]<sub>D</sub><sup>28</sup> +2.2 (*c* 0.82, CHCl<sub>3</sub>); IR (neat) 3435, 2954, 2929, 2886, 2857, 1642 cm<sup>-1</sup>; <sup>1</sup>H NMR (400 MHz, CDCl<sub>3</sub>)  $\delta$  5.56 (dt, *J* = 15.3, 7.2 Hz, 1 H), 5.42 (dd, *J* = 15.3, 7.1 Hz, 1 H), 4.15 (dd, *J* = 7.1, 4.6 Hz, 1 H), 3.91–3.85 (m, 3 H), 3.80 (d, *J* = 3.2 Hz, 1 H), 3.75–3.68 (m, 2 H), 3.61 (t, *J* = 6.5 Hz, 2 H), 3.61–3.58 (m, 2 H), 2.07 (q, *J* = 7.2 Hz, 2 H), 1.89–1.83 (m, 1 H), 1.69 (brs, 1 H), 1.67–1.65 (m, 1 H), 1.61–1.55 (m, 3 H), 1.50–1.47 (m, 1 H), 1.37 (d, *J* = 13.4 Hz, 1 H), 0.90 (s, 9 H), 0.90 (s, 9 H), 0.89 (s, 9 H), 0.89 (s, 9 H), 0.88 (s, 9 H), 0.07 (s, 6 H), 0.06 (s, 6 H), 0.05 (s, 6 H), 0.05 (s, 6 H), 0.02 (s, 6 H); <sup>13</sup>C NMR (100 MHz, CDCl<sub>3</sub>)  $\delta$  131.5, 131.3, 80.0, 75.9, 69.8, 68.2, 65.1, 64.2, 62.6, 61.6, 45.2, 35.2, 34.9, 32.5, 28.5, 26.0, 25.9, 18.4, 18.4, 18.1, 18.1, -3.9, -4.6, -4.8, -4.8, -5.2, -5.2; HRMS (ESI–TOF) calcd for C<sub>45</sub>H<sub>98</sub>O<sub>7</sub>Si<sub>5</sub>Na [M + Na]<sup>+</sup> 913.6057, found 913.6061.

**Sulfide 22.** To a solution of alcohol **21** (83.1 mg, 93.0  $\mu$ mol) in CH<sub>2</sub>Cl<sub>2</sub> (0.9 mL) were added Et<sub>3</sub>N (26  $\mu$ L, 0.186 mmol), DMAP (2.3 mg, 18.8  $\mu$ mol), and TsCl (21.4 mg, 0.112 mmol) at 0 °C. The mixture was stirred at room temperature for 4 h. To the mixture were added Et<sub>3</sub>N (26  $\mu$ L, 0.186 mmol) and TsCl (21.4 mg, 0.112 mmol) at 0 °C. The mixture was stirred at room

temperature for 4 h. To the mixture were added Et<sub>3</sub>N (26 μL, 0.186 mmol) and TsCl (21.4 mg, 0.112 mmol) at 0 °C. The mixture was stirred at room temperature for 14 h. The reaction was quenched with saturated aqueous NH<sub>4</sub>Cl. The mixture was diluted with EtOAc, washed with H<sub>2</sub>O and brine, and then dried over Na<sub>2</sub>SO<sub>4</sub>. Concentration and short column chromatography (hexane/EtOAc = 70:1) gave the corresponding tosylate (87.3 mg), which was used for the next step without further purification.

To a solution of the tosylate obtained above (87.3 mg) in DMF (0.8 mL) was added NaI (249 mg, 1.66 mmol) at room temperature. The mixture was stirred at 100 °C for 7 h. To the mixture was added NaI (124 mg, 0.830 mmol) at room temperature. The mixture was stirred at 100 °C for 3 h. The reaction was quenched with saturated aqueous Na<sub>2</sub>S<sub>2</sub>O<sub>3</sub>. The mixture was diluted with EtOAc, washed with H<sub>2</sub>O and brine, and then dried over Na<sub>2</sub>SO<sub>4</sub>. Concentration and short column chromatography (hexane/EtOAc = 80:1) gave the corresponding alkyl iodide (67.0 mg), which was used for the next step without further purification.

To a solution of the alkyl iodide obtained above (67.0 mg) in benzene (0.7 mL) were added PhSH (27 μL, 0.264 mmol) and DBU (47 μL, 0.317 mmol) at 4 °C. The mixture was stirred at room temperature for 3 h. The reaction was quenched with saturated aqueous NH<sub>4</sub>Cl. The mixture was diluted with EtOAc, washed with H<sub>2</sub>O and brine, and then dried over Na<sub>2</sub>SO<sub>4</sub>. Concentration and column chromatography (hexane/EtOAc = 70:1) gave sulfide **22** (61.4 mg, 68% in three steps): yellow oil; *R*<sub>f</sub> = 0.49 (hexane/EtOAc = 40:1); [α]<sub>D</sub><sup>28</sup> -7.6 (*c* 1.32, CHCl<sub>3</sub>); IR (neat) 2954, 2929, 2886, 2857 cm<sup>-1</sup>; <sup>1</sup>H NMR (400 MHz, CDCl<sub>3</sub>) δ 7.32 (d, *J* = 8.0 Hz, 2 H), 7.23 (t, *J* = 8.0 Hz, 2 H), 7.12 (d, *J* = 8.0 Hz, 1 H), 5.57 (dt, *J* = 15.5, 7.2 Hz, 1 H), 5.40 (dd, *J* = 15.5, 7.0 Hz, 1 H), 4.36 (dd, *J* = 7.0, 4.5 Hz, 1 H), 3.92 (dd, *J* = 9.9, 7.5 Hz, 1 H), 3.87–3.85 (m, 1 H), 3.80–3.76 (m, 2 H), 3.66 (t, *J* = 7.1 Hz, 1 H), 3.62–3.59 (m, 1 H), 3.60 (t, *J* = 6.5 Hz, 2 H), 3.10 (dd, *J* = 12.8, 6.2 Hz, 1 H), 2.90 (dd, *J* = 12.8, 7.2 Hz, 1 H), 2.06 (q, *J* = 7.2 Hz, 2 H), 1.92–1.87 (m, 1 H), 1.81–1.74 (m, 1 H), 1.68–1.50 (m, 4 H), 1.34 (d, *J* = 3.2 Hz, 1 H), 0.90 (s, 9 H), 0.90 (s, 9 H), 0.89 (s, 9 H), 0.88 (s, 9 H), 0.86 (s, 9 H), 0.08–0.01 (m, 30 H); <sup>13</sup>C NMR (100 MHz, CDCl<sub>3</sub>) δ 137.6, 131.7, 130.7, 128.7, 128.6, 125.3, 79.5, 73.8, 70.0, 68.3, 64.7, 62.7, 61.9, 42.0, 34.9, 34.8, 34.8, 32.5, 28.6, 26.1, 26.0, 18.4, 18.3, 18.2, 18.1, -3.9, -4.5, -4.7, -4.8, -5.1; HRMS (ESI-TOF) calcd for C<sub>51</sub>H<sub>102</sub>O<sub>6</sub>SSi<sub>5</sub>Na [M + Na]<sup>+</sup> 1005.6141, found 1005.6141.

**Alkene 24.** To a solution of alkene **22** (33.7 mg, 34.3 μmol) in pyridine (0.3 mL) was added OsO<sub>4</sub> (0.05 M in CH<sub>2</sub>Cl<sub>2</sub>, 0.8 mL, 40.0 μmol) at room temperature. The mixture was stirred at the same temperature for 2 h. To the mixture were added NaHSO<sub>3</sub> (272 mg), H<sub>2</sub>O (1.2 mL), and pyridine (1.1 mL) at room temperature. The mixture was stirred at the same temperature for 12 h. The mixture was diluted with EtOAc, washed with H<sub>2</sub>O and brine, and then dried over Na<sub>2</sub>SO<sub>4</sub>. Concentration gave diol **23** (34.5 mg), which was used for the next step without further purification.

To a solution of sulfide **23** obtained above (34.5 mg) in CH<sub>2</sub>Cl<sub>2</sub> (0.5 mL) was added *m*CPBA



(69–75%, 11.0 mg, 44.0–47.8  $\mu\text{mol}$ ) at  $-78\text{ }^\circ\text{C}$ . The mixture was stirred at the same temperature for 5 h. The reaction was quenched with 2-methyl-2-butene. The mixture was diluted with EtOAc, washed with saturated aqueous  $\text{NaHCO}_3$ ,  $\text{H}_2\text{O}$ , and brine, and then dried over  $\text{Na}_2\text{SO}_4$ . Concentration gave the corresponding sulfoxide (36.2 mg), which was used for the next step without further purification.

To a solution of the sulfoxide obtained above (36.2 mg) in xylene (0.4 mL) was added  $\text{NaHCO}_3$  (11.8 mg, 0.140 mmol) at room temperature. The mixture was stirred at reflux for 15 h. The mixture was diluted with EtOAc, washed with  $\text{H}_2\text{O}$  and brine, and then dried over  $\text{Na}_2\text{SO}_4$ . Concentration and column chromatography (hexane/EtOAc = 15:1) gave alkene **24** (17.2 mg, 56% in three steps): colorless oil;  $R_f = 0.41$  (hexane/EtOAc = 10:1);  $[\alpha]_{\text{D}}^{28} +3.2$  ( $c$  0.86,  $\text{CHCl}_3$ ); IR (neat) 3435, 2954, 2929, 2891, 2857, 1645  $\text{cm}^{-1}$ ;  $^1\text{H}$  NMR (400 MHz,  $\text{CDCl}_3$ )  $\delta$  5.18 (s, 1 H), 5.12 (s, 1 H), 4.19 (d,  $J = 6.8$  Hz, 1 H), 4.03–3.95 (m, 2 H), 3.80–3.68 (m, 3 H), 3.63 (t,  $J = 5.9$  Hz, 2 H), 3.51 (d,  $J = 3.2$  Hz, 1 H), 3.40–3.38 (m, 2 H), 2.55 (brs, 1 H), 2.21 (dd,  $J = 15.2$ , 9.4 Hz, 1 H), 2.02 (dd,  $J = 15.2$ , 3.2 Hz, 1 H), 1.91–1.84 (m, 1 H), 1.66–1.53 (m, 5 H), 1.41 (d,  $J = 13.2$  Hz, 1 H), 0.91 (s, 9 H), 0.90 (s, 9 H), 0.90 (s, 9 H), 0.89 (s, 9 H), 0.88 (s, 9 H), 0.10–0.02 (m, 30 H);  $^{13}\text{C}$  NMR (100 MHz,  $\text{CDCl}_3$ )  $\delta$  146.2, 115.5, 80.3, 78.6, 71.6, 69.6, 69.5, 68.0, 65.9, 63.3, 61.0, 35.8, 34.7, 31.3, 29.5, 26.1, 26.1, 25.9, 25.9, 25.9, 18.5, 18.4, 18.2, 18.1, 18.0,  $-4.5$ ,  $-4.6$ ,  $-4.8$ ,  $-4.9$ ,  $-5.0$ ,  $-5.1$ ,  $-5.2$ ,  $-5.3$ ; HRMS (ESI-TOF) calcd for  $\text{C}_{45}\text{H}_{98}\text{O}_8\text{Si}_5\text{Na}$  [ $\text{M} + \text{Na}$ ] $^+$  929.6006, found 929.6005.

**Candidate Compound 3a from 24.** To a solution of pentakis-TBS ether **24** (4.1 mg, 4.52  $\mu\text{mol}$ ) in MeOH (0.5 mL) was added 1.0 M aqueous HCl (0.20 mL, 0.200 mmol) at room temperature. The mixture was stirred at the same temperature for 2 h. To the mixture was added 1.0 M aqueous HCl (0.20 mL, 0.200 mmol) at room temperature. The mixture was stirred at the same temperature for 1 h. To the mixture was added 1.0 M aqueous HCl (0.20 mL, 0.200 mmol) at room temperature. The mixture was stirred at the same temperature for 1 h. The mixture was diluted with MeOH. Concentration and column chromatography ( $\text{CH}_2\text{Cl}_2/\text{MeOH} = 4:1$ ) gave candidate compound **3a** (1.5 mg, 99%).

**Alcohol 25.** To a solution of diol **17** (71.8 mg, 0.111 mmol) in  $\text{CH}_2\text{Cl}_2$  (1.1 mL) were added DMAP (2.7 mg, 22.4  $\mu\text{mol}$ ), imidazole (22.7 mg, 0.333 mmol), and TBSCl (40.1 mg, 0.266 mmol) at room temperature. The mixture was stirred at the same temperature for 1 h. To the mixture were added imidazole (22.7 mg, 0.333 mmol) and TBSCl (40.1 mg, 0.266 mmol) at room temperature. The mixture was stirred at the same temperature for 12 h. The reaction was quenched with saturated aqueous  $\text{NH}_4\text{Cl}$ . The mixture was diluted with EtOAc, washed with  $\text{H}_2\text{O}$  and brine, and then dried over  $\text{Na}_2\text{SO}_4$ . Concentration and short column chromatography (hexane, hexane/EtOAc = 70:1) gave the corresponding pentakis-TBS ether (85.0 mg), which was used for the next step without further purification.

A mixture of the alkene obtained above (85.0 mg) and 9-BBN (71.0 mg, 0.582 mmol) in THF (1.0 mL) was stirred at 50 °C for 1 h. To the mixture were added 3.0 M aqueous NaOH (0.8 mL, 2.40 mmol) and 30% aqueous H<sub>2</sub>O<sub>2</sub> (0.8 mL, 7.80 mmol) at 0 °C. The mixture was stirred at room temperature for 30 min. The mixture was diluted with EtOAc, washed with H<sub>2</sub>O and brine, and then dried over Na<sub>2</sub>SO<sub>4</sub>. Concentration and column chromatography (hexane/EtOAc = 20:1) gave alcohol **25** (73.6 mg, 75% in two steps): colorless oil; *R*<sub>f</sub> = 0.46 (hexane/EtOAc = 10:1); [α]<sub>D</sub><sup>28</sup> +4.5 (*c* 1.33, CHCl<sub>3</sub>); IR (neat) 3436, 2954, 2929, 2890, 2857, 1638 cm<sup>-1</sup>; <sup>1</sup>H NMR (400 MHz, CDCl<sub>3</sub>) δ 5.57 (dt, *J* = 15.4, 7.0 Hz, 1 H), 5.47 (dd, *J* = 15.4, 6.6 Hz, 1 H), 4.18 (dd, *J* = 6.4, 4.8 Hz, 1 H), 4.01–3.96 (m, 1 H), 3.92–3.78 (m, 4 H), 3.68 (t, *J* = 6.7 Hz, 1 H), 3.62–3.59 (m, 1 H), 3.61 (t, *J* = 6.4 Hz, 2 H), 3.56–3.54 (m, 1 H), 2.08 (q, *J* = 7.0 Hz, 2 H), 1.95–1.89 (m, 1 H), 1.80–1.76 (m, 1 H), 1.64–1.57 (m, 5 H), 1.32 (d, *J* = 13.9 Hz, 1 H), 0.90 (s, 9 H), 0.90 (s, 9 H), 0.90 (s, 9 H), 0.89 (s, 9 H), 0.88 (s, 9 H), 0.07–0.02 (m, 30 H); <sup>13</sup>C NMR (100 MHz, CDCl<sub>3</sub>) δ 132.0, 131.1, 79.8, 77.7, 70.0, 68.5, 63.5, 62.7, 62.6, 61.6, 42.3, 34.6, 34.5, 32.5, 28.6, 26.0, 26.0, 25.9, 18.4, 18.3, 18.1, -3.9, -4.5, -4.6, -4.8, -5.2, -5.2; HRMS (ESI-TOF) calcd for C<sub>45</sub>H<sub>98</sub>O<sub>7</sub>Si<sub>5</sub>Na [M + Na]<sup>+</sup> 913.6057, found 913.6056.

**Sulfide 26.** To a solution of alcohol **25** (73.6 mg, 82.6 μmol) in CH<sub>2</sub>Cl<sub>2</sub> (0.8 mL) were added Et<sub>3</sub>N (23 μL, 0.166 mmol), DMAP (2.3 mg, 17.2 μmol), and TsCl (19.1 mg, 0.100 mmol) at 0 °C. The mixture was stirred at room temperature for 3 h. To the mixture were added Et<sub>3</sub>N (23 μL, 0.166 mmol) and TsCl (19.1 mg, 0.100 mmol) at 0 °C. The mixture was stirred at room temperature for 3 h. To the mixture were added Et<sub>3</sub>N (46 μL, 0.332 mmol) and TsCl (38.2 mg, 0.200 mmol) at 0 °C. The mixture was stirred at room temperature for 11 h. The reaction was quenched with saturated aqueous NH<sub>4</sub>Cl. The mixture was diluted with EtOAc, washed with H<sub>2</sub>O and brine, and then dried over Na<sub>2</sub>SO<sub>4</sub>. Concentration and short column chromatography (hexane/EtOAc = 70:1) gave the corresponding tosylate (70.1 mg), which was used for the next step without further purification.

To a solution of the tosylate obtained above (70.1 mg) in DMF (0.7 mL) was added NaI (30.1 mg, 0.201 mmol) at room temperature. The mixture was stirred at 100 °C for 2 h. The reaction was quenched with saturated aqueous Na<sub>2</sub>S<sub>2</sub>O<sub>3</sub>. The mixture was diluted with EtOAc, washed with H<sub>2</sub>O and brine, and then dried over Na<sub>2</sub>SO<sub>4</sub>. Concentration and short column chromatography (hexane/EtOAc = 80:1) gave the corresponding alkyl iodide (54.0 mg), which was used for the next step without further purification.

To a solution of the alkyl iodide obtained above (54.0 mg) in benzene (0.5 mL) were added PhSH (22 μL, 0.212 mmol) and DBU (38 μL, 0.254 mmol) at 4 °C. The mixture was stirred at room temperature for 3 h. To the mixture were added PhSH (22 μL, 0.212 mmol) and DBU (38 μL, 0.254 mmol) at 4 °C. The mixture was stirred at room temperature for 1 h. The reaction was quenched with saturated aqueous NH<sub>4</sub>Cl. The mixture was diluted with EtOAc, washed with H<sub>2</sub>O and brine, and then dried over Na<sub>2</sub>SO<sub>4</sub>. Concentration and column chromatography

(hexane/EtOAc = 70:1) gave sulfide **26** (59.1 mg, 72% in three steps): colorless oil;  $R_f = 0.40$  (hexane/EtOAc = 40:1);  $[\alpha]_D^{28} +3.1$  ( $c$  1.46,  $\text{CHCl}_3$ ); IR (neat) 2954, 2929, 2886, 2857, 1644  $\text{cm}^{-1}$ ;  $^1\text{H}$  NMR (400 MHz,  $\text{CDCl}_3$ )  $\delta$  7.30–7.27 (m, 2 H), 7.25–7.19 (m, 2 H), 7.11 (t,  $J = 7.2$  Hz, 1 H), 5.56 (dt,  $J = 15.3, 7.1$  Hz, 1 H), 5.40 (dd,  $J = 15.3, 7.0$  Hz, 1 H), 4.26–4.23 (m, 1 H), 3.99–3.93 (m, 1 H), 3.91–3.87 (m, 1 H), 3.79 (brs, 1 H), 3.73 (dd,  $J = 9.8, 6.1$  Hz, 1 H), 3.63–3.58 (m, 2 H), 3.61 (t,  $J = 6.7$  Hz, 2 H), 3.08 (dd,  $J = 12.7, 5.4$  Hz, 1 H), 2.98 (dd,  $J = 12.7, 6.4$  Hz, 1 H), 2.07 (q,  $J = 7.1$  Hz, 2 H), 1.92–1.88 (m, 1 H), 1.78–1.71 (m, 2 H), 1.61–1.56 (m, 3 H), 1.39–1.33 (m, 1 H), 0.91 (s, 9 H), 0.90 (s, 9 H), 0.88 (s, 9 H), 0.88 (s, 9 H), 0.87 (s, 9 H), 0.08–0.00 (m, 30 H);  $^{13}\text{C}$  NMR (100 MHz,  $\text{CDCl}_3$ )  $\delta$  137.7, 131.7, 131.4, 128.6, 128.5, 125.2, 79.4, 74.8, 70.1, 68.3, 64.2, 62.7, 62.0, 40.8, 35.3, 34.9, 34.1, 32.6, 28.6, 26.0, 26.0, 18.4, 18.3, 18.2, 18.1, 18.1, –3.8, –4.5, –4.6, –4.7, –4.8, –5.1; HRMS (ESI–TOF) calcd for  $\text{C}_{51}\text{H}_{102}\text{O}_6\text{SSi}_5\text{Na}$   $[\text{M} + \text{Na}]^+$  1005.6141, found 1005.6137.

**Alkene 28.** To a solution of alkene **26** (51.6 mg, 52.4  $\mu\text{mol}$ ) in pyridine (0.5 mL) was added  $\text{OsO}_4$  (0.05 M in  $\text{CH}_2\text{Cl}_2$ , 1.2 mL, 60.0  $\mu\text{mol}$ ) at room temperature. The mixture was stirred at the same temperature for 2 h. To the mixture was added  $\text{OsO}_4$  (0.05 M in  $\text{CH}_2\text{Cl}_2$ , 1.2 mL, 60.0  $\mu\text{mol}$ ) at room temperature. To the mixture were added  $\text{NaHSO}_3$  (472 mg),  $\text{H}_2\text{O}$  (1.2 mL), and pyridine (0.9 mL) at room temperature. The mixture was stirred at the same temperature for 9 h. The mixture was diluted with EtOAc, washed with saturated aqueous  $\text{CuSO}_4$ ,  $\text{H}_2\text{O}$ , and brine, and then dried over  $\text{Na}_2\text{SO}_4$ . Concentration gave diol **27** (52.8 mg), which was used for the next step without further purification.

To a solution of sulfide **27** obtained above (52.8 mg) in  $\text{CH}_2\text{Cl}_2$  (0.5 mL) was added *m*CPBA (69–75%, 17.0 mg, 68.0–73.9  $\mu\text{mol}$ ) at  $-78$  °C. The mixture was stirred at the same temperature for 3 h. The reaction was quenched with 2-methyl-2-butene. The mixture was diluted with EtOAc, washed with saturated aqueous  $\text{NaHCO}_3$ ,  $\text{H}_2\text{O}$ , and brine, and then dried over  $\text{Na}_2\text{SO}_4$ . Concentration gave the corresponding sulfoxide (54.6 mg), which was used for the next step without further purification.

To a solution of the sulfoxide obtained above (54.6 mg) in xylene (0.5 mL) was added  $\text{NaHCO}_3$  (17.5 mg, 0.208 mmol) at room temperature. The mixture was stirred at reflux for 17 h. The mixture was diluted with EtOAc, washed with  $\text{H}_2\text{O}$  and brine, and then dried over  $\text{Na}_2\text{SO}_4$ . Concentration and column chromatography (hexane/EtOAc = 16:1) gave alkene **28** (26.0 mg, 56% in three steps): colorless oil;  $R_f = 0.38$  (hexane/EtOAc = 10:1);  $[\alpha]_D^{28} +0.1$  ( $c$  1.30,  $\text{CHCl}_3$ ); IR (neat) 3500, 2955, 2929, 2888, 2858  $\text{cm}^{-1}$ ;  $^1\text{H}$  NMR (400 MHz,  $\text{CDCl}_3$ )  $\delta$  5.23 (s, 1 H), 5.13 (s, 1 H), 4.26 (d,  $J = 5.4$  Hz, 1 H), 4.09–4.03 (m, 1 H), 3.95–3.86 (m, 2 H), 3.84–3.81 (m, 2 H), 3.70 (t,  $J = 6.7$  Hz, 1 H), 3.64–3.60 (m, 1 H), 3.62 (t,  $J = 6.4$  Hz, 2 H), 3.38 (brs, 1 H), 2.85 (brs, 1 H), 2.23 (dd,  $J = 15.0, 6.7$  Hz, 1 H), 2.14 (dd,  $J = 15.0, 5.5$  Hz, 1 H), 1.91–1.84 (m, 1 H), 1.65–1.48 (m, 5 H), 1.39 (d,  $J = 12.9$  Hz, 1 H), 0.91 (s, 9 H), 0.90 (s, 9 H), 0.90 (s, 9 H), 0.89 (s, 9 H), 0.89 (s, 9 H), 0.11–0.04 (m, 30 H);  $^{13}\text{C}$  NMR (100 MHz,  $\text{CDCl}_3$ )  $\delta$  144.7, 115.1, 80.0,

79.3, 72.6, 69.8, 69.5, 68.1, 64.5, 63.2, 61.5, 37.7, 34.2, 30.9, 29.4, 26.1, 26.0, 26.0, 25.9, 25.9, 18.4, 18.3, 18.2, 18.1, 18.1, -4.6, -4.9, -5.0, -5.2; HRMS (ESI-TOF) calcd for C<sub>45</sub>H<sub>98</sub>O<sub>8</sub>Si<sub>5</sub>Na [M + Na]<sup>+</sup> 929.6006, found 929.6002.

**Candidate Compound 3b from 28.** To a solution of pentakis-TBS ether **28** (5.6 mg, 6.17 μmol) in MeOH (0.5 mL) was added 1.0 M aqueous HCl (60 μL, 60.0 μmol) at room temperature. The mixture was stirred at the same temperature for 1 h. To the mixture was added 1.0 M aqueous HCl (0.30 mL, 0.300 mmol) at room temperature. The mixture was stirred at the same temperature for 1 h. The mixture was diluted with MeOH. Concentration and column chromatography (CH<sub>2</sub>Cl<sub>2</sub>/MeOH = 4:1) gave candidate compound **3b** (2.0 mg, 96%).

**Table S1.** <sup>1</sup>H NMR chemical shifts and their deviations of natural symbiodinolide (**1**) and the synthetic products **3a** and **3b**.<sup>[a]</sup>

| Position | <b>1</b> <sup>[b]</sup> | <b>3a</b> <sup>[c]</sup> | <b>3b</b> <sup>[c]</sup> | $\Delta\delta = \delta_1 - \delta_{3a}$ | $\Delta\delta = \delta_1 - \delta_{3b}$ |
|----------|-------------------------|--------------------------|--------------------------|-----------------------------------------|-----------------------------------------|
| 66       | 4.09                    | 4.19                     | 4.20                     | -0.10                                   | -0.11                                   |
| 68a      | 2.33                    | 2.36                     | 2.32                     | -0.03                                   | +0.01                                   |
| 68b      | 2.63                    | 2.55                     | 2.65                     | +0.08                                   | -0.02                                   |
| 69       | 4.27                    | 4.25                     | 4.28                     | +0.02                                   | -0.01                                   |

<sup>[a]</sup> Chemical shifts are reported in ppm with reference to the internal residual solvent (CD<sub>3</sub>OD: 3.30 ppm). <sup>[b]</sup> Data reported in reference 2. Recorded at 800 MHz. <sup>[c]</sup> Recorded at 600 MHz.

**Table S2.** <sup>1</sup>H NMR chemical shifts and their deviations of natural symbiodinolide (**1**) and the synthetic products **3a** and **3b**.<sup>[a]</sup>

| Position | <b>1</b> <sup>[b]</sup> | <b>3a</b> <sup>[c]</sup> | <b>3b</b> <sup>[c]</sup> | $\Delta\delta = \delta_1 - \delta_{3a}$ | $\Delta\delta = \delta_1 - \delta_{3b}$ |
|----------|-------------------------|--------------------------|--------------------------|-----------------------------------------|-----------------------------------------|
| 70a      | 1.64                    | 1.69                     | 1.70                     | -0.05                                   | -0.06                                   |
| 70b      | 1.72                    | 1.98                     | 1.96                     | -0.26                                   | -0.24                                   |
| 71       | 3.80                    | 3.79                     | 3.80                     | +0.01                                   | 0                                       |
| 72       | 3.04                    | 3.21                     | 3.18                     | -0.17                                   | -0.14                                   |
| 73       | 3.69                    | 3.53                     | 3.53                     | +0.16                                   | +0.16                                   |

<sup>[a]</sup> Chemical shifts are reported in ppm with reference to the internal residual solvent (CD<sub>3</sub>OD: 3.30 ppm). <sup>[b]</sup> Data reported in reference 2. Recorded at 800 MHz. <sup>[c]</sup> Recorded at 600 MHz.

**Alkyne 41.** To a solution of diol **37** (3.71 g, 22.0 mmol) in CH<sub>2</sub>Cl<sub>2</sub> (73 mL) was added K<sub>2</sub>CO<sub>3</sub> (5.47 g, 39.6 mmol) at room temperature. The mixture was stirred at the same temperature for 4 days. The mixture was filtered and washed with CH<sub>2</sub>Cl<sub>2</sub> (80 mL). To the mixture were added PhI(OAc)<sub>2</sub> (8.50 g, 26.4 mmol) and TEMPO (516 mg, 3.30 mmol) at room temperature. The mixture was stirred at the same temperature for 20 min. To the mixture was added Ph<sub>3</sub>P=CHCO<sub>2</sub>Me (11.4 g, 33.0 mmol) at 0 °C. The mixture was stirred at room temperature for

1 h. The mixture was filtered through short column chromatography (hexane/EtOAc = 4:1). The mixture was concentrated, washed with saturated aqueous Na<sub>2</sub>S<sub>2</sub>O<sub>3</sub>, saturated aqueous NaHCO<sub>3</sub>, H<sub>2</sub>O, and brine, and then dried over Na<sub>2</sub>SO<sub>4</sub>. Concentration and short column chromatography (hexane/EtOAc = 5:1) gave  $\alpha,\beta$ -unsaturated ester **38** (1.95 g), which was used for the next step without further purification.

A mixture of alkene **38** obtained above (1.95 g) and 5% Pd/C (en) (190 mg) in THF (45 mL) was stirred at room temperature for 1 h under H<sub>2</sub> atmosphere. To the mixture was added 5% Pd/C (en) (190 mg) at room temperature. The mixture was stirred at room temperature for 12 h under H<sub>2</sub> atmosphere. The catalyst was filtered off and the mixture was washed with Et<sub>2</sub>O. Concentration gave the corresponding alkane (1.38 g), which was used for the next step without further purification.

To a solution of trimethylsilylacetylene (2.0 mL, 14.4 mmol) in THF (48 mL) was added *n*-BuLi (2.60 M in hexane, 5.5 mL, 14.4 mmol) at -78 °C. The mixture was stirred at the same temperature for 30 min. To the mixture was added BF<sub>3</sub>·OEt<sub>2</sub> (1.7 mL, 14.4 mmol) at -78 °C. The mixture was stirred at the same temperature for 1 h. To the mixture was added the epoxide obtained above (1.38 g) in THF (6.0 mL + 5.0 mL + 5.0 mL) at -78 °C. The mixture was stirred at the same temperature for 2 h. The reaction was quenched with MeOH and saturated aqueous NH<sub>4</sub>Cl. The mixture was diluted with EtOAc and washed with H<sub>2</sub>O and brine. The aqueous phase was extracted with EtOAc and the combined organic phase was dried over Na<sub>2</sub>SO<sub>4</sub>. Concentration and short column chromatography (hexane/EtOAc = 4:1) gave alcohol **39** (2.09 g), which was used for the next step without further purification.

To a solution of alcohol **39** obtained above (2.09 g) in CH<sub>2</sub>Cl<sub>2</sub> (21 mL) were added *i*-Pr<sub>2</sub>NEt (5.9 mL, 34.0 mmol), TBAI (628 mg, 1.70 mmol), and BOMCl (3.5 mL, 25.5 mmol) at room temperature. The mixture was stirred at reflux for 11 h. To the mixture were added *i*-Pr<sub>2</sub>NEt (5.9 mL, 34.0 mmol) and BOMCl (3.5 mL, 25.5 mmol) at room temperature. The mixture was stirred at reflux for 3 h. The mixture was diluted with EtOAc, washed with H<sub>2</sub>O and brine, and then dried over Na<sub>2</sub>SO<sub>4</sub>. Concentration and short column chromatography (hexane/EtOAc = 10:1) gave the corresponding BOM ether (4.43 g), which was used for the next step without further purification.

To a suspension of LiAlH<sub>4</sub> (387 mg, 10.2 mmol) in THF (30 mL) was added the ester obtained above (4.43 g) in THF (3.0 mL + 5.0 mL + 5.0 mL) at 0 °C. The mixture was stirred at the same temperature for 20 min. The reaction was quenched with saturated aqueous sodium potassium tartrate. The mixture was stirred at room temperature for 1 h. The mixture was diluted with EtOAc, washed with H<sub>2</sub>O and brine, and then dried over Na<sub>2</sub>SO<sub>4</sub>. Concentration and short column chromatography (hexane/EtOAc = 8:1, 3:1) gave alcohol **40** (2.32 g), which was used for the next step without further purification.

To a solution of alcohol **40** obtained above (2.32 g) in CH<sub>2</sub>Cl<sub>2</sub> (23 mL) were added *i*-Pr<sub>2</sub>NEt (2.4 mL, 13.9 mmol), TBAI (256 mg, 0.694 mmol), and MOMCl (0.79 mL, 10.4 mmol) at room

temperature. The mixture was stirred at the same temperature for 2 h. To the mixture were added *i*-Pr<sub>2</sub>NEt (1.2 mL, 6.95 mmol) and MOMCl (0.40 mL, 5.20 mmol) at room temperature. The mixture was stirred at the same temperature for 3 h. To the mixture were added *i*-Pr<sub>2</sub>NEt (1.2 mL, 6.95 mmol) and MOMCl (0.40 mL, 5.20 mmol) at room temperature. The mixture was stirred at the same temperature for 2 h. The reaction was quenched with saturated aqueous NH<sub>4</sub>Cl. The mixture was diluted with EtOAc, washed with saturated aqueous NH<sub>4</sub>Cl, saturated aqueous NaHCO<sub>3</sub>, H<sub>2</sub>O, and brine, and then dried over Na<sub>2</sub>SO<sub>4</sub>. Concentration and short column chromatography (hexane/EtOAc = 1:1) gave the corresponding MOM ether (2.47 g), which was used for the next step without further purification.

To a solution of the alkyne obtained above (2.47 g) in MeOH (33 mL) was added K<sub>2</sub>CO<sub>3</sub> (1.80 g, 13.0 mmol) at room temperature. The mixture was stirred at the same temperature for 14 h. The mixture was diluted with EtOAc, washed with H<sub>2</sub>O and brine, and then dried over Na<sub>2</sub>SO<sub>4</sub>. Concentration and column chromatography (hexane/EtOAc = 8:1) gave alkyne **41** (1.91 g, 28% in seven steps): colorless oil; *R*<sub>f</sub> = 0.42 (hexane/EtOAc = 3:1); [ $\alpha$ ]<sub>D</sub><sup>25</sup> +21.4 (*c* 0.99, CHCl<sub>3</sub>); IR (neat) 3292, 2928, 2880 cm<sup>-1</sup>; <sup>1</sup>H NMR (400 MHz, CDCl<sub>3</sub>)  $\delta$  7.36–7.27 (m, 5 H), 4.88 (d, *J* = 7.2 Hz, 1 H), 4.81 (d, *J* = 7.2 Hz, 1 H), 4.69 (d, *J* = 11.6 Hz, 1 H), 4.63 (d, *J* = 11.6 Hz, 1 H), 4.61 (s, 2 H), 3.81–3.75 (m, 1 H), 3.53 (t, *J* = 6.5 Hz, 2 H), 3.35 (s, 3 H), 2.54–2.42 (m, 2 H), 2.01 (t, *J* = 2.7 Hz, 1 H), 1.73–1.68 (m, 2 H), 1.66–1.60 (m, 2 H), 1.60–1.39 (m, 2 H); <sup>13</sup>C NMR (100 MHz, CDCl<sub>3</sub>)  $\delta$  137.7, 128.3, 127.8, 127.6, 96.4, 93.7, 81.0, 75.6, 70.1, 69.7, 67.6, 55.1, 33.8, 29.7, 24.5, 22.1; HRMS (ESI–TOF) calcd for C<sub>18</sub>H<sub>26</sub>O<sub>4</sub>Na [M + Na]<sup>+</sup> 329.1729, found 329.1726.

**Alcohol 43.** To a solution of triacetate **42** (1.17 g, 3.84 mmol) in MeOH (13 mL) was added NaOMe (304 mg, 5.63 mmol) at 0 °C. The mixture was stirred at room temperature for 20 min. The reaction was quenched with 3.0 M aqueous HCl at 0 °C. The mixture was diluted MeOH and dried over Na<sub>2</sub>SO<sub>4</sub>. Concentration gave the corresponding triol (975 mg), which was used for the next step without further purification.

To a solution of the triol obtained above (975 mg) in DMF (11 mL) were added imidazole (2.69 g, 39.5 mmol), DMAP (205 mg, 1.68 mmol), and TBSCl (3.04 g, 20.2 mmol) at room temperature. The mixture was stirred at 80 °C for 13 h. To the mixture were added imidazole (1.84 g, 27.0 mmol) and TBSCl (1.98 g, 13.1 mmol) at room temperature. The mixture was stirred at 80 °C for 4 h. To the mixture were added imidazole (935 mg, 13.7 mmol) and TBSCl (1.06 g, 7.03 mmol) at room temperature. The mixture was stirred at 80 °C for 3 h. The reaction was quenched with saturated aqueous NH<sub>4</sub>Cl. The mixture was diluted with EtOAc, washed with H<sub>2</sub>O and brine, and then dried over Na<sub>2</sub>SO<sub>4</sub>. Concentration and short column chromatography (hexane, hexane/EtOAc = 40:1) gave the corresponding tris-TBS ether (2.70 g), which was used for the next step without further purification.

To a solution of the tris-TBS ether obtained above (2.70 g) in CH<sub>2</sub>Cl<sub>2</sub> (19 mL) and MeOH (19

mL) was added CSA (267 mg, 1.15 mmol) at 0 °C. The mixture was stirred at the same temperature for 2 h. The reaction was quenched with Et<sub>3</sub>N. The mixture was diluted with EtOAc, washed with H<sub>2</sub>O and brine, and then dried over Na<sub>2</sub>SO<sub>4</sub>. Concentration and column chromatography (hexane/EtOAc = 6:1) gave alcohol **43** (1.19 g, 76% in three steps): colorless oil; *R*<sub>f</sub> = 0.34 (hexane/EtOAc = 4:1); [α]<sub>D</sub><sup>23</sup> +63.6 (*c* 1.00, CHCl<sub>3</sub>); IR (neat) 3501, 2955, 2930, 2896, 2857 cm<sup>-1</sup>; <sup>1</sup>H NMR (400 MHz, CDCl<sub>3</sub>) δ 4.73–4.72 (m, 1 H), 4.00–3.94 (m, 1 H), 3.82–3.77 (m, 1 H), 3.72–3.66 (m, 1 H), 3.57–3.52 (m, 1 H), 3.41 (d, *J* = 8.8 Hz, 1 H), 3.31 (s, 3 H), 2.07 (dd, *J* = 13.3, 4.8 Hz, 1 H), 1.93 (t, *J* = 6.4 Hz, 1 H), 1.64 (dd, *J* = 13.3, 3.6 Hz, 1 H), 0.91 (s, 9 H), 0.89 (s, 9 H), 0.11 (s, 3 H), 0.11 (s, 3 H), 0.10 (s, 3 H), 0.08 (s, 3 H); <sup>13</sup>C NMR (100 MHz, CDCl<sub>3</sub>) δ 98.3, 73.0, 72.8, 70.8, 62.3, 54.7, 39.0, 26.3, 26.1, 18.4, 18.1, -2.8, -3.0, -4.1, -4.6; HRMS (ESI-TOF) calcd for C<sub>19</sub>H<sub>42</sub>O<sub>5</sub>Si<sub>2</sub>Na [M + Na]<sup>+</sup> 429.2469, found 429.2467.

**Aldehyde 44.** To a solution of alcohol **43** (256 mg, 0.629 mmol) in CH<sub>2</sub>Cl<sub>2</sub> (6.3 mL) were added Et<sub>3</sub>N (0.17 mL, 1.26 mmol), DMAP (14.6 mg, 0.126 mmol), and TsCl (144 mg, 0.755 mmol) at 0 °C. The mixture was stirred at room temperature for 2 h. To the mixture were added Et<sub>3</sub>N (0.51 mL, 3.78 mmol) and TsCl (432 mg, 2.27 mmol) at 0 °C. The mixture was stirred at room temperature for 4 h. The reaction was quenched with saturated aqueous NaHCO<sub>3</sub>. The mixture was diluted with EtOAc, washed with H<sub>2</sub>O and brine, and then dried over Na<sub>2</sub>SO<sub>4</sub>. Concentration and short column chromatography (hexane/EtOAc = 40:1, 10:1) gave the corresponding tosylate (325 mg), which was used for the next step without further purification. To a solution of the tosylate obtained above (325 mg) in DMSO (5.8 mL) was added NaCN (63.4 mg, 1.33 mmol) at room temperature. The mixture was stirred at 70 °C for 3 h. To the mixture was added NaCN (35.4 mg, 0.722 mmol) at room temperature. The mixture was stirred at 70 °C for 1 h. The mixture was diluted with EtOAc, washed with H<sub>2</sub>O and brine, and then dried over Na<sub>2</sub>SO<sub>4</sub>. Concentration and short column chromatography (hexane/EtOAc = 20:1) gave the corresponding nitrile (193 mg), which was used for the next step without further purification.

To a solution of the nitrile obtained above (193 mg) in CH<sub>2</sub>Cl<sub>2</sub> (4.6 mL) was added DIBAL-H (1.02 M in hexane, 1.0 mL, 1.02 mmol) at -78 °C. The mixture was stirred at the same temperature for 1 h. The reaction was quenched with MeOH. The mixture was filtered through a Celite pad and washed with EtOAc. Concentration and column chromatography (hexane/EtOAc = 15:1, 10:1) gave aldehyde **44** (146 mg, 55% in three steps): colorless oil; *R*<sub>f</sub> = 0.50 (hexane/EtOAc = 7:1); [α]<sub>D</sub><sup>23</sup> +59.0 (*c* 0.67, CHCl<sub>3</sub>); IR (neat) 2952, 2930, 2896, 2857, 1733 cm<sup>-1</sup>; <sup>1</sup>H NMR (600 MHz, CDCl<sub>3</sub>) δ 9.77 (dd, *J* = 3.4, 0.6 Hz, 1 H), 4.65 (dd, *J* = 3.6, 2.0 Hz, 1 H), 4.09 (ddd, *J* = 10.4, 8.4, 2.4 Hz, 1 H), 3.98 (ddd, *J* = 10.4, 8.4, 4.8 Hz, 1 H), 3.30 (s, 3 H), 3.26 (t, *J* = 8.4 Hz, 1 H), 2.82 (ddd, *J* = 15.5, 2.4, 0.6 Hz, 1 H), 2.49 (ddd, *J* = 15.5, 10.4, 3.4 Hz, 1 H), 2.09 (ddd, *J* = 13.2, 4.8, 2.0 Hz, 1 H), 1.65 (ddd, *J* = 13.2, 10.4, 3.6 Hz, 1 H), 0.90 (s, 9 H), 0.88 (s, 9 H), 0.11 (s, 3 H), 0.10 (s, 3 H), 0.08 (s, 3 H), 0.07 (s, 3 H); <sup>13</sup>C NMR (100

MHz, CDCl<sub>3</sub>)  $\delta$  200.9, 98.2, 76.2, 70.6, 68.3, 54.9, 46.3, 39.1, 26.3, 26.1, 18.4, 18.1, -2.8, -3.0, -3.9, -4.1; HRMS (ESI-TOF) calcd for C<sub>20</sub>H<sub>42</sub>O<sub>5</sub>Si<sub>2</sub>Na [M + MeOH + Na]<sup>+</sup> 473.2731, found 473.2718.

**Propargylic Alcohols 45 and 46.** To a solution of alkyne **41** (901 mg, 2.94 mmol) in THF (10 mL) was added *n*-BuLi (2.60 M in hexane, 0.93 mL, 2.42 mmol) at -78 °C. The mixture was stirred at the same temperature for 1 h. To the mixture was added aldehyde **44** (674 mg, 1.61 mmol) in THF (2.0 mL + 2.0 mL + 2.0 mL) at -78 °C. The mixture was warmed up to room temperature and stirred at the same temperature for 2 h. The reaction was quenched with MeOH and saturated aqueous NH<sub>4</sub>Cl. The mixture was diluted with EtOAc, washed with H<sub>2</sub>O and brine, and then dried over Na<sub>2</sub>SO<sub>4</sub>. Concentration and column chromatography (hexane/EtOAc = 8:1, 5:1, 3:1) gave propargylic alcohols **45** (323 mg, 28%) and **46** (668 mg, 57%). Propargylic alcohol **45**: colorless oil; *R<sub>f</sub>* = 0.32 (hexane/EtOAc = 2:1); [ $\alpha$ ]<sub>D</sub><sup>23</sup> +52.8 (*c* 0.83, CHCl<sub>3</sub>); IR (neat) 3435, 2948, 2930, 2894, 2855 cm<sup>-1</sup>; <sup>1</sup>H NMR (400 MHz, CDCl<sub>3</sub>)  $\delta$  7.35–7.27 (m, 5 H), 4.86 (d, *J* = 7.0 Hz, 1 H), 4.78 (d, *J* = 7.0 Hz, 1 H), 4.67–4.66 (m, 1 H), 4.64 (s, 2 H), 4.60 (s, 2 H), 4.58–4.56 (m, 1 H), 3.92 (ddd, *J* = 10.8, 8.0, 4.8 Hz, 1 H), 3.76–3.68 (m, 2 H), 3.52 (t, *J* = 6.4 Hz, 2 H), 3.35 (s, 3 H), 3.31 (s, 3 H), 3.21 (t, *J* = 8.3 Hz, 1 H), 2.91 (d, *J* = 3.2 Hz, 1 H), 2.52–2.48 (m, 2 H), 2.23 (ddd, *J* = 13.6, 6.4, 2.0 Hz, 1 H), 2.06 (ddd, *J* = 13.2, 4.8, 1.6 Hz, 1 H), 1.84–1.76 (m, 1 H), 1.72–1.58 (m, 5 H), 1.57–1.50 (m, 1 H), 1.49–1.39 (m, 1 H), 0.90 (s, 9 H), 0.90 (s, 9 H), 0.11 (s, 3 H), 0.10 (s, 3 H), 0.10 (s, 3 H), 0.08 (s, 3 H); <sup>13</sup>C NMR (100 MHz, CDCl<sub>3</sub>)  $\delta$  137.8, 128.3, 127.7, 127.6, 98.2, 96.3, 93.8, 82.4, 81.7, 75.9, 72.0, 70.5, 69.7, 67.6, 62.0, 55.1, 54.9, 40.7, 38.9, 34.0, 29.7, 26.3, 26.2, 24.8, 22.1, 18.3, 18.1, -2.7, -3.0, -3.8, -4.2; HRMS (ESI-TOF) calcd for C<sub>38</sub>H<sub>68</sub>O<sub>9</sub>Si<sub>2</sub>Na [M + Na]<sup>+</sup> 747.4300, found 747.4303. Propargylic alcohol **46**: colorless oil; *R<sub>f</sub>* = 0.45 (hexane/EtOAc = 2:1); [ $\alpha$ ]<sub>D</sub><sup>22</sup> +52.3 (*c* 0.95, CHCl<sub>3</sub>); IR (neat) 3465, 2952, 2930, 2892, 2858 cm<sup>-1</sup>; <sup>1</sup>H NMR (400 MHz, CDCl<sub>3</sub>)  $\delta$  7.35–7.27 (m, 5 H), 4.86 (d, *J* = 7.1 Hz, 1 H), 4.78 (d, *J* = 7.1 Hz, 1 H), 4.69–4.68 (m, 1 H), 4.64 (s, 2 H), 4.64–4.60 (m, 1 H), 4.60 (s, 2 H), 4.07 (td, *J* = 10.4, 2.0 Hz, 1 H), 3.98–3.92 (m, 1 H), 3.78–3.73 (m, 1 H), 3.52 (t, *J* = 6.4 Hz, 2 H), 3.38 (s, 3 H), 3.35 (s, 3 H), 3.24 (t, *J* = 8.6 Hz, 1 H), 2.55–2.44 (m, 2 H), 2.15 (ddd, *J* = 14.4, 6.4, 2.0 Hz, 1 H), 2.07 (dd, *J* = 12.8, 4.0 Hz, 1 H), 1.81 (ddd, *J* = 14.4, 10.8, 2.8 Hz, 1 H), 1.72–1.59 (m, 5 H), 1.56–1.51 (m, 1 H), 1.50–1.41 (m, 1 H), 0.90 (s, 9 H), 0.89 (s, 9 H), 0.11 (s, 3 H), 0.10 (s, 3 H), 0.08 (s, 3 H), 0.08 (s, 3 H); <sup>13</sup>C NMR (100 MHz, CDCl<sub>3</sub>)  $\delta$  137.8, 128.3, 127.7, 127.6, 98.3, 96.3, 93.8, 82.5, 81.8, 76.5, 75.9, 70.8, 70.4, 69.7, 67.6, 61.0, 55.2, 55.1, 39.0, 38.9, 34.0, 29.8, 26.3, 26.2, 24.8, 22.2, 18.4, 18.1, -2.6, -3.0, -3.9, -4.1; HRMS (ESI-TOF) calcd for C<sub>38</sub>H<sub>68</sub>O<sub>9</sub>Si<sub>2</sub>Na [M + Na]<sup>+</sup> 747.4300, found 747.4298.

**Stereochemical Determination of 46.** The absolute configuration at the C75 position of **46** was determined by the modified Mosher method<sup>1</sup> as shown in Scheme S4 and Figure S2.



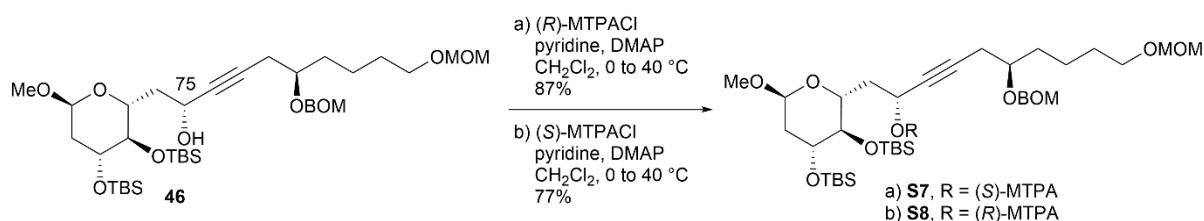

**Scheme S4.** Transformation of propargylic alcohol **46** for its stereochemical determination.

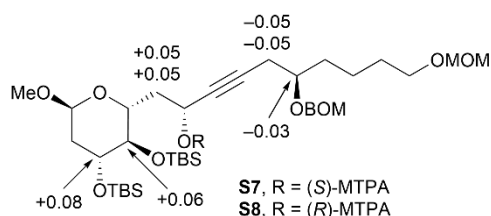

**Figure S2.** Chemical shift differences ( $\Delta\delta_{S-R}$ ) of MTPA esters **S7** and **S8**.

**(*S*)-MTPA Ester S7.** To a solution of alcohol **46** (1.6 mg, 2.21  $\mu\text{mol}$ ) in CH<sub>2</sub>Cl<sub>2</sub> (0.2 mL) were added pyridine (0.5  $\mu\text{L}$ , 6.63  $\mu\text{mol}$ ), DMAP (0.8 mg, 6.55  $\mu\text{mol}$ ), and (*R*)-MTPACl (0.8  $\mu\text{L}$ , 4.42  $\mu\text{mol}$ ) at 0 °C. The mixture was stirred at room temperature for 20 min. To the mixture were added pyridine (1.0  $\mu\text{L}$ , 13.3  $\mu\text{mol}$ ) and (*R*)-MTPACl (1.6  $\mu\text{L}$ , 8.84  $\mu\text{mol}$ ) at room temperature. The mixture was stirred at 40 °C for 20 h. The reaction was quenched with saturated aqueous NH<sub>4</sub>Cl. The mixture was diluted with EtOAc, washed with H<sub>2</sub>O and brine, and then dried over Na<sub>2</sub>SO<sub>4</sub>. Concentration and column chromatography (hexane/EtOAc = 6:1) gave (*S*)-MTPA ester **S7** (1.8 mg, 87%): colorless oil;  $R_f$  = 0.61 (hexane/EtOAc = 2:1);  $[\alpha]_D^{22} +34.3$  ( $c$  0.14, CHCl<sub>3</sub>); IR (neat) 2950, 2928, 2856, 1752 cm<sup>-1</sup>; <sup>1</sup>H NMR (400 MHz, CDCl<sub>3</sub>)  $\delta$  7.56–7.54 (m, 2 H), 7.38–7.26 (m, 8 H), 5.72–5.69 (m, 1 H), 4.84 (d,  $J$  = 7.1 Hz, 1 H), 4.75 (d,  $J$  = 7.1 Hz, 1 H), 4.63–4.61 (m, 1 H), 4.62 (s, 2 H), 4.60 (s, 2 H), 3.88–3.82 (m, 1 H), 3.73–3.68 (m, 1 H), 3.54 (s, 3 H), 3.52–3.46 (m, 1 H), 3.50 (t,  $J$  = 6.4 Hz, 2 H), 3.34 (s, 3 H), 3.17 (s, 3 H), 3.17–3.14 (m, 1 H), 2.47–2.46 (m, 3 H), 2.02 (ddd,  $J$  = 13.6, 4.8, 2.4 Hz, 1 H), 1.81 (t,  $J$  = 12.7 Hz, 1 H), 1.65–1.55 (m, 6 H), 1.49–1.40 (m, 1 H), 0.91 (s, 9 H), 0.85 (s, 9 H), 0.10 (s, 3 H), 0.09 (s, 3 H), 0.08 (s, 3 H), 0.06 (s, 3 H); <sup>13</sup>C NMR (100 MHz, CDCl<sub>3</sub>)  $\delta$  165.7, 137.7, 131.8, 129.4, 128.4, 128.2, 127.8, 127.6, 97.9, 96.4, 93.9, 83.4, 78.4, 76.2, 75.9, 70.8, 69.7, 68.6, 67.6, 63.6, 55.5, 55.1, 55.0, 38.6, 38.1, 34.0, 29.8, 26.3, 26.0, 24.8, 22.1, 18.4, 18.0, -2.8, -3.1, -4.0, -4.2; HRMS (ESI-TOF) calcd for C<sub>48</sub>H<sub>75</sub>F<sub>3</sub>O<sub>11</sub>Si<sub>2</sub>Na [M + Na]<sup>+</sup> 963.4698, found 963.4695.

**(*R*)-MTPA Ester S8.** To a solution of alcohol **46** (2.8 mg, 3.86  $\mu\text{mol}$ ) in CH<sub>2</sub>Cl<sub>2</sub> (0.2 mL) were added pyridine (0.9  $\mu\text{L}$ , 11.6  $\mu\text{mol}$ ), DMAP (1.4 mg, 11.6  $\mu\text{mol}$ ), and (*S*)-MTPACl (1.4  $\mu\text{L}$ , 7.72  $\mu\text{mol}$ ) at 0 °C. The mixture was stirred at room temperature for 1 h. To the mixture were added pyridine (0.9  $\mu\text{L}$ , 11.6  $\mu\text{mol}$ ) and (*S*)-MTPACl (1.4  $\mu\text{L}$ , 7.72  $\mu\text{mol}$ ) at room temperature.

The mixture was stirred at 40 °C for 14 h. The reaction was quenched with saturated aqueous NH<sub>4</sub>Cl. The mixture was diluted with EtOAc, washed with H<sub>2</sub>O and brine, and then dried over Na<sub>2</sub>SO<sub>4</sub>. Concentration and column chromatography (hexane/EtOAc = 6:1) gave (*R*)-MTPA ester **S8** (2.8 mg, 77%): colorless oil; *R<sub>f</sub>* = 0.42 (hexane/EtOAc = 3:1); [ $\alpha$ ]<sub>D</sub><sup>22</sup> +68.0 (*c* 0.14, CHCl<sub>3</sub>); IR (neat) 2953, 2928, 2853, 1753 cm<sup>-1</sup>; <sup>1</sup>H NMR (400 MHz, CDCl<sub>3</sub>)  $\delta$  7.58–7.55 (m, 2 H), 7.38–7.28 (m, 8 H), 5.70–5.67 (m, 1 H), 4.84 (d, *J* = 7.1 Hz, 1 H), 4.76 (d, *J* = 7.1 Hz, 1 H), 4.62 (s, 2 H), 4.60–4.59 (m, 1 H), 4.59 (s, 2 H), 3.80–3.70 (m, 2 H), 3.57 (s, 3 H), 3.50 (t, *J* = 6.4 Hz, 2 H), 3.34 (s, 3 H), 3.28 (t, *J* = 9.8 Hz, 1 H), 3.21 (s, 3 H), 3.09 (t, *J* = 8.1 Hz, 1 H), 2.50 (dd, *J* = 5.8, 1.6 Hz, 2 H), 2.44–2.37 (m, 1 H), 2.01–1.97 (m, 1 H), 1.80–1.73 (m, 1 H), 1.65–1.40 (m, 7 H), 0.90 (s, 9 H), 0.80 (s, 9 H), 0.09 (s, 3 H), 0.07 (s, 3 H), 0.05 (s, 3 H), 0.03 (s, 3 H); <sup>13</sup>C NMR (100 MHz, CDCl<sub>3</sub>)  $\delta$  165.7, 137.7, 132.3, 129.4, 128.4, 128.2, 127.8, 127.7, 127.3, 98.0, 96.4, 93.9, 83.6, 78.6, 76.1, 75.8, 70.6, 69.7, 68.5, 67.6, 63.3, 55.4, 55.1, 38.7, 38.4, 34.1, 29.8, 26.3, 26.0, 24.8, 22.1, 18.3, 18.0, -2.7, -3.2, -4.1, -4.2; HRMS (ESI-TOF) calcd for C<sub>48</sub>H<sub>75</sub>F<sub>3</sub>O<sub>11</sub>Si<sub>2</sub>Na [M + Na]<sup>+</sup> 963.4698, found 963.4701.

**Allylic Alcohol 47.** To a solution of propargylic alcohol **45** (294 mg, 0.406 mmol) in Et<sub>2</sub>O (4.1 mL) was added Red-Al (65% in toluene, 1.2 mL, 4.01 mmol) at 0 °C. The mixture was stirred at reflux for 4 h. The reaction was quenched with saturated aqueous sodium potassium tartrate at 0 °C. The mixture was diluted with EtOAc, washed with H<sub>2</sub>O and brine, and then dried over Na<sub>2</sub>SO<sub>4</sub>. Concentration and column chromatography (hexane/EtOAc = 4:1) gave allylic alcohol **47** (220 mg, 75%): colorless oil; *R<sub>f</sub>* = 0.49 (hexane/EtOAc = 2:1); [ $\alpha$ ]<sub>D</sub><sup>26</sup> +48.9 (*c* 1.78, CHCl<sub>3</sub>); IR (neat) 3465, 3032, 2952, 2930, 2896, 2857 cm<sup>-1</sup>; <sup>1</sup>H NMR (600 MHz, CDCl<sub>3</sub>)  $\delta$  7.34–7.27 (m, 5 H), 5.68 (ddd, *J* = 15.6, 7.8, 7.2 Hz, 1 H), 5.54 (dd, *J* = 15.6, 6.6 Hz, 1 H), 4.81 (d, *J* = 7.2 Hz, 1 H), 4.76 (d, *J* = 7.2 Hz, 1 H), 4.70 (d, *J* = 2.4 Hz, 1 H), 4.64 (d, *J* = 12.0 Hz, 1 H), 4.61 (d, *J* = 12.0 Hz, 1 H), 4.60 (s, 2 H), 4.27–4.24 (m, 1 H), 3.91 (ddd, *J* = 10.8, 7.8, 4.8 Hz, 1 H), 3.71–3.65 (m, 2 H), 3.51–3.49 (m, 3 H), 3.34 (s, 3 H), 3.33 (s, 3 H), 3.19 (t, *J* = 9.0 Hz, 1 H), 2.35–2.25 (m, 2 H), 2.10–2.04 (m, 2 H), 1.66–1.48 (m, 7 H), 1.42–1.36 (m, 1 H), 0.90 (s, 9 H), 0.87 (s, 9 H), 0.09 (s, 3 H), 0.07 (s, 3 H), 0.07 (s, 3 H), 0.07 (s, 3 H), 0.06 (s, 3 H); <sup>13</sup>C NMR (150 MHz, CDCl<sub>3</sub>)  $\delta$  137.9, 135.1, 128.4, 127.8, 127.6, 126.7, 98.4, 96.3, 93.4, 76.9, 76.7, 73.7, 72.7, 70.3, 69.5, 67.7, 55.1, 55.0, 39.3, 38.8, 37.2, 33.9, 29.8, 26.3, 26.1, 22.1, 18.3, 18.0, -2.7, -3.1, -3.9, -4.3; HRMS (ESI-TOF) calcd for C<sub>38</sub>H<sub>70</sub>O<sub>9</sub>Si<sub>2</sub>Na [M + Na]<sup>+</sup> 749.4456, found 749.4457.

**Tris-TBS Ether 48.** To a solution of allylic alcohol **47** (113 mg, 0.155 mmol) in CH<sub>2</sub>Cl<sub>2</sub> (3.1 mL) were added 2,6-lutidine (54  $\mu$ L, 0.465 mmol) and TBSOTf (85  $\mu$ L, 0.372 mmol) at 0 °C. The mixture was stirred at the same temperature for 30 min. The reaction was quenched with saturated aqueous NaHCO<sub>3</sub>. The mixture was diluted with EtOAc, washed with H<sub>2</sub>O and brine, and then dried over Na<sub>2</sub>SO<sub>4</sub>. Concentration and column chromatography (hexane/EtOAc = 10:1) gave tris-TBS ether **48** (129 mg, 99%): pale yellow oil; *R<sub>f</sub>* = 0.57 (hexane/EtOAc = 4:1);

$[\alpha]_D^{22} +52.1$  (*c* 1.45, CHCl<sub>3</sub>); IR (neat) 2955, 2929, 2896, 2857 cm<sup>-1</sup>; <sup>1</sup>H NMR (400 MHz, CDCl<sub>3</sub>)  $\delta$  7.35–7.28 (m, 5 H), 5.60–5.45 (m, 2 H), 4.82 (d, *J* = 7.2 Hz, 1 H), 4.76 (d, *J* = 7.2 Hz, 1 H), 4.66 (d, *J* = 11.6 Hz, 1 H), 4.63 (s, 1 H), 4.60 (s, 2 H), 4.58 (d, *J* = 11.6 Hz, 1 H), 4.27 (ddd, *J* = 10.0, 6.4, 3.6 Hz, 1 H), 3.85 (ddd, *J* = 10.4, 7.6, 4.5 Hz, 1 H), 3.69–3.64 (m, 1 H), 3.50 (t, *J* = 6.2 Hz, 2 H), 3.48–3.43 (m, 1 H), 3.34 (s, 3 H), 3.29 (s, 3 H), 3.16 (t, *J* = 8.0 Hz, 1 H), 2.32–2.25 (m, 2 H), 2.03–1.91 (m, 2 H), 1.69–1.40 (m, 8 H), 0.89 (s, 9 H), 0.88 (s, 9 H), 0.87 (s, 9 H), 0.08 (s, 3 H), 0.08 (s, 3 H), 0.07 (s, 3 H), 0.06 (s, 3 H), 0.05 (s, 3 H), 0.02 (s, 3 H); <sup>13</sup>C NMR (150 MHz, CDCl<sub>3</sub>)  $\delta$  137.9, 135.8, 128.4, 127.8, 127.6, 126.8, 97.8, 96.4, 93.5, 77.1, 76.5, 71.0, 70.7, 70.1, 69.5, 67.7, 55.1, 55.0, 41.2, 38.6, 37.1, 34.0, 29.8, 26.2, 26.1, 25.9, 22.2, 18.2, 18.2, 18.1, -2.9, -3.3, -4.0, -4.3, -4.3, -4.7; HRMS (ESI-TOF) calcd for C<sub>44</sub>H<sub>84</sub>O<sub>9</sub>Si<sub>3</sub>Na [M + Na]<sup>+</sup> 863.5321, found 863.5323.

**Diol 49.** To a solution of alkene **48** (64.0 mg, 76.1  $\mu$ mol) in pyridine (2.5 mL) was added OsO<sub>4</sub> (0.05 M in CH<sub>2</sub>Cl<sub>2</sub>, 2.0 mL, 0.100 mmol) at room temperature. The mixture was stirred at the same temperature for 1 h. To the mixture were added NaHSO<sub>3</sub> (560 mg), H<sub>2</sub>O (10.0 mL), and pyridine (9.5 mL) at room temperature. The mixture was stirred at the same temperature for 1 h. The mixture was diluted with EtOAc and washed with H<sub>2</sub>O and brine. The aqueous phase was extracted with EtOAc three times and the combined organic phase was dried over Na<sub>2</sub>SO<sub>4</sub>. Concentration and column chromatography (hexane/EtOAc = 4:1) gave diols **49** (18.2 mg, 28%) and **S9** (37.1 mg, 55%). Diol **49**: colorless oil; *R*<sub>f</sub> = 0.47 (hexane/EtOAc = 3:1);  $[\alpha]_D^{22} +39.1$  (*c* 0.69, CHCl<sub>3</sub>); IR (neat) 3501, 2954, 2929, 2899, 2857 cm<sup>-1</sup>; <sup>1</sup>H NMR (400 MHz, CDCl<sub>3</sub>)  $\delta$  7.35–7.28 (m, 5 H), 4.78 (d, *J* = 6.8 Hz, 1 H), 4.76 (d, *J* = 6.8 Hz, 1 H), 4.63 (s, 3 H), 4.61 (s, 1 H), 4.59 (s, 2 H), 4.05 (dt, *J* = 10.1, 2.6 Hz, 1 H), 3.95–3.85 (m, 2 H), 3.78–3.76 (m, 1 H), 3.58 (t, *J* = 9.3 Hz, 1 H), 3.50 (t, *J* = 6.5 Hz, 2 H), 3.42–3.38 (m, 1 H), 3.34 (s, 3 H), 3.27 (s, 3 H), 3.17 (s, 1 H), 3.14 (t, *J* = 8.3 Hz, 1 H), 2.55 (d, *J* = 8.4 Hz, 1 H), 2.38–2.32 (m, 1 H), 2.02 (ddd, *J* = 13.3, 4.6, 2.0 Hz, 1 H), 1.85 (ddd, *J* = 14.2, 9.8, 6.5 Hz, 1 H), 1.65–1.43 (m, 9 H), 0.90 (s, 9 H), 0.90 (s, 9 H), 0.88 (s, 9 H), 0.13 (s, 3 H), 0.10 (s, 3 H), 0.09 (s, 3 H), 0.07 (s, 3 H), 0.07 (s, 3 H), 0.06 (s, 3 H); <sup>13</sup>C NMR (100 MHz, CDCl<sub>3</sub>)  $\delta$  137.8, 128.4, 127.8, 127.6, 98.2, 96.3, 92.9, 77.2, 75.7, 74.4, 70.7, 70.5, 70.2, 69.5, 67.6, 55.2, 55.1, 39.0, 38.2, 36.8, 34.0, 29.9, 26.3, 26.1, 25.8, 21.9, 18.3, 18.0, 18.0, -2.8, -3.1, -3.9, -4.3, -4.8; HRMS (ESI-TOF) calcd for C<sub>44</sub>H<sub>86</sub>O<sub>11</sub>Si<sub>3</sub>Na [M + Na]<sup>+</sup> 897.5376, found 897.5381. Diol **S9**: colorless oil; *R*<sub>f</sub> = 0.38 (hexane/EtOAc = 3:1);  $[\alpha]_D^{14} +40.3$  (*c* 0.77, CHCl<sub>3</sub>); IR (neat) 3489, 2952, 2930, 2896, 2858 cm<sup>-1</sup>; <sup>1</sup>H NMR (400 MHz, CDCl<sub>3</sub>)  $\delta$  7.35–7.28 (m, 5 H), 4.83 (s, 2 H), 4.65 (s, 2 H), 4.62 (s, 1 H), 4.59 (s, 2 H), 4.22 (dt, *J* = 9.6, 3.6 Hz, 1 H), 4.17 (dt, *J* = 10.4, 2.4 Hz, 1 H), 3.92–3.86 (m, 2 H), 3.57 (ddd, *J* = 11.2, 8.8, 2.0 Hz, 1 H), 3.49 (t, *J* = 6.8 Hz, 2 H), 3.39 (dd, *J* = 8.9, 4.0 Hz, 1 H), 3.34 (s, 3 H), 3.31 (s, 3 H), 3.23 (d, *J* = 2.5 Hz, 1 H), 3.15 (t, *J* = 8.3 Hz, 1 H), 2.83 (d, *J* = 9.0 Hz, 1 H), 2.14 (ddd, *J* = 14.0, 9.6, 2.0 Hz, 1 H), 2.04 (ddd, *J* = 12.8, 4.4, 2.0 Hz, 1 H), 1.93 (ddd, *J* = 14.0, 10.0, 3.2 Hz, 1 H), 1.70–1.43 (m, 9 H), 0.89 (s, 9 H), 0.89 (s, 9 H), 0.88

(s, 9 H), 0.12 (s, 3 H), 0.12 (s, 3 H), 0.94 (s, 3 H), 0.94 (s, 3 H), 0.07 (s, 3 H), 0.07 (s, 3 H);  $^{13}\text{C}$  NMR (150 MHz,  $\text{CDCl}_3$ )  $\delta$  138.0, 128.4, 127.8, 127.6, 98.3, 96.4, 94.3, 77.5, 75.1, 73.6, 73.5, 70.6, 69.5, 68.9, 67.7, 66.6, 55.4, 55.1, 39.1, 39.0, 36.4, 34.9, 29.9, 26.3, 26.2, 25.8, 21.9, 18.3, 18.0, 17.9, -3.0, -3.0, -3.7, -4.3, -4.6, -4.9; HRMS (ESI-TOF) calcd for  $\text{C}_{44}\text{H}_{86}\text{O}_{11}\text{Si}_3\text{Na}$  [ $\text{M} + \text{Na}$ ] $^+$  897.5376, found 897.5333.

**Stereochemical Determination of S9.** Treatment of diol **S9** with MTPACl/ $\text{Et}_3\text{N}$ /DMAP provided mono-(*S*)-MTPA ester **S10** and mono-(*R*)-MTPA ester **S11** at the C77 positions, respectively (Scheme S5). The C77 absolute stereochemistry of **S9** was determined by applying the modified Mosher method<sup>1</sup> (Figure S3). The C76 absolute configuration of **S9** was elucidated based on the *syn*-addition reaction mechanism of  $\text{OsO}_4$ -catalyzed dihydroxylation.

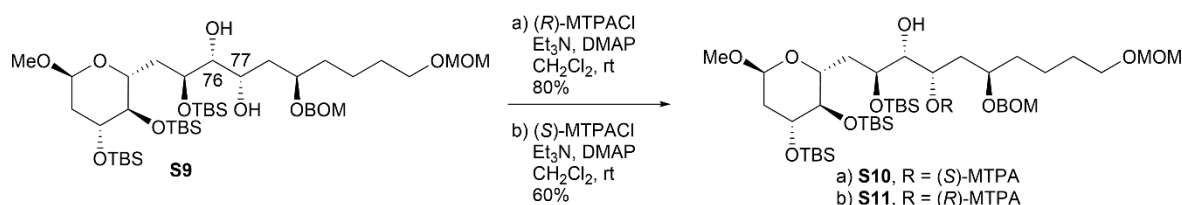

**Scheme S5.** Transformation of diol **S9** for its stereochemical determination.

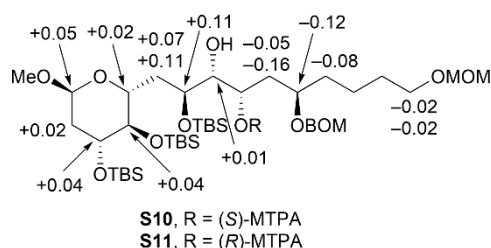

**Figure S3.** Chemical shift differences ( $\Delta\delta_{S-R}$ ) of MTPA esters **S10** and **S11**.

**(*S*)-MTPA Ester S10.** To a solution of diol **S9** (6.1 mg, 6.97  $\mu\text{mol}$ ) in  $\text{CH}_2\text{Cl}_2$  (0.2 mL) were added DMAP (1.7 mg, 13.9  $\mu\text{mol}$ ),  $\text{Et}_3\text{N}$  (39  $\mu\text{L}$ , 0.279 mmol), and (*R*)-MTPACl (30  $\mu\text{L}$ , 0.209 mmol) at room temperature. The mixture was stirred at the same temperature for 1 h. The reaction was quenched with saturated aqueous  $\text{NH}_4\text{Cl}$ . The mixture was diluted with  $\text{EtOAc}$ , washed with  $\text{H}_2\text{O}$  and brine, and then dried over  $\text{Na}_2\text{SO}_4$ . Concentration and column chromatography (hexane/ $\text{EtOAc}$  = 7:1) gave (*S*)-MTPA ester **S10** (6.1 mg, 80%): colorless oil;  $R_f$  = 0.43 (hexane/ $\text{EtOAc}$  = 4:1);  $[\alpha]_{\text{D}}^{22}$  +26.0 ( $c$  0.065,  $\text{CHCl}_3$ ); IR (neat) 3501, 2956, 2928, 2856, 1746  $\text{cm}^{-1}$ ;  $^1\text{H}$  NMR (600 MHz,  $\text{CDCl}_3$ )  $\delta$  7.65–7.63 (m, 2 H), 7.38–7.27 (m, 8 H), 5.49–5.47 (m, 1 H), 4.77 (d,  $J$  = 7.2 Hz, 1 H), 4.76 (d,  $J$  = 7.2 Hz, 1 H), 4.67 (d,  $J$  = 11.8 Hz, 1 H), 4.64 (dd,  $J$  = 3.6, 1.2 Hz, 1 H), 4.58 (s, 2 H), 4.56 (d,  $J$  = 11.8 Hz, 1 H), 3.93–3.89 (m, 2 H), 3.81 (t,  $J$  = 6.5 Hz, 1 H), 3.65–3.63 (m, 1 H), 3.57 (s, 3 H), 3.48–3.41 (m, 3 H), 3.35–3.34 (m,

1 H), 3.33 (s, 3 H), 3.30 (s, 3 H), 3.18 (t,  $J = 8.2$  Hz, 1 H), 2.10 (ddd,  $J = 14.4, 6.0, 1.8$  Hz, 1 H), 2.06 (ddd,  $J = 13.2, 4.8, 1.8$  Hz, 1 H), 1.96 (ddd,  $J = 14.4, 8.5, 3.7$  Hz, 1 H), 1.83 (ddd,  $J = 14.4, 8.5, 4.2$  Hz, 1 H), 1.72–1.49 (m, 8 H), 0.90 (s, 9 H), 0.90 (s, 9 H), 0.89 (s, 9 H), 0.11 (s, 3 H), 0.10 (s, 3 H), 0.07 (s, 3 H), 0.07 (s, 3 H), 0.06 (s, 3 H), 0.05 (s, 3 H);  $^{13}\text{C}$  NMR (150 MHz,  $\text{CDCl}_3$ )  $\delta$  166.4, 138.0, 132.0, 129.5, 128.4, 128.3, 127.8, 127.6, 127.6, 98.3, 96.3, 94.5, 77.5, 76.6, 75.1, 74.1, 70.6, 69.9, 69.7, 67.6, 67.5, 55.5, 55.1, 39.3, 37.1, 34.9, 34.0, 29.7, 26.3, 26.3, 25.9, 21.6, 18.3, 18.0, 18.0, -2.9, -3.0, -3.5, -4.1, -4.2, -5.2; HRMS (ESI-TOF) calcd for  $\text{C}_{54}\text{H}_{93}\text{F}_3\text{O}_{13}\text{Si}_3\text{Na}$   $[\text{M} + \text{Na}]^+$  1113.5774, found 1113.5769.

**(R)-MTPA Ester S11.** To a solution of diol **S9** (3.6 mg, 4.11  $\mu\text{mol}$ ) in  $\text{CH}_2\text{Cl}_2$  (0.2 mL) were added DMAP (1.0 mg, 8.19  $\mu\text{mol}$ ),  $\text{Et}_3\text{N}$  (21  $\mu\text{L}$ , 0.148 mmol), and (*S*)-MTPACl (19  $\mu\text{L}$ , 98.6  $\mu\text{mol}$ ) at room temperature. The mixture was stirred at the same temperature for 1 h. The reaction was quenched with saturated aqueous  $\text{NH}_4\text{Cl}$ . The mixture was diluted with EtOAc, washed with  $\text{H}_2\text{O}$  and brine, and then dried over  $\text{Na}_2\text{SO}_4$ . Concentration and column chromatography (hexane/EtOAc = 7:1) gave (*R*)-MTPA ester **S11** (2.7 mg, 60%): colorless oil;  $R_f = 0.43$  (hexane/EtOAc = 4:1);  $[\alpha]_{\text{D}}^{21} +54.3$  ( $c$  0.095,  $\text{CHCl}_3$ ); IR (neat) 3490, 2956, 2928, 2856, 1744  $\text{cm}^{-1}$ ;  $^1\text{H}$  NMR (600 MHz,  $\text{CDCl}_3$ )  $\delta$  7.62–7.61 (m, 2 H), 7.38–7.28 (m, 8 H), 5.37 (t,  $J = 5.7$  Hz, 1 H), 4.78 (d,  $J = 7.2$  Hz, 1 H), 4.77 (d,  $J = 7.2$  Hz, 1 H), 4.66 (d,  $J = 11.8$  Hz, 1 H), 4.59 (s, 2 H), 4.58 (s, 1 H), 4.54 (d,  $J = 11.8$  Hz, 1 H), 3.91–3.85 (m, 2 H), 3.70 (t,  $J = 6.5$  Hz, 1 H), 3.66–3.63 (m, 1 H), 3.55 (s, 3 H), 3.49–3.46 (m, 1 H), 3.48 (t,  $J = 6.6$  Hz, 1 H), 3.33 (s, 3 H), 3.27 (s, 3 H), 3.14 (t,  $J = 8.5$  Hz, 1 H), 2.07–2.00 (m, 4 H), 1.66–1.39 (m, 8 H), 0.89 (s, 9 H), 0.89 (s, 9 H), 0.89 (s, 9 H), 0.10 (s, 3 H), 0.09 (s, 3 H), 0.09 (s, 3 H), 0.07 (s, 3 H), 0.07 (s, 3 H), 0.04 (s, 3 H);  $^{13}\text{C}$  NMR (150 MHz,  $\text{CDCl}_3$ )  $\delta$  166.3, 137.9, 132.0, 129.6, 128.4, 128.4, 127.8, 127.6, 127.5, 98.2, 96.3, 94.5, 77.4, 76.1, 75.3, 74.4, 70.6, 69.8, 69.7, 67.7, 67.6, 55.4, 55.1, 39.2, 36.7, 34.9, 30.3, 29.7, 26.3, 26.3, 25.9, 21.7, 18.0, 18.0, 18.0, -2.9, -3.0, -3.5, -4.0, -4.2, -5.0; HRMS (ESI-TOF) calcd for  $\text{C}_{54}\text{H}_{93}\text{F}_3\text{O}_{13}\text{Si}_3\text{Na}$   $[\text{M} + \text{Na}]^+$  1113.5774, found 1113.5775.

**Triol 50.** A mixture of BOM ether **49** (12.4 mg, 14.2  $\mu\text{mol}$ ) and 20%  $\text{Pd}(\text{OH})_2/\text{C}$  (2.0 mg) in MeOH (0.5 mL) was stirred at room temperature for 2 h under  $\text{H}_2$  atmosphere. The catalyst was filtered off and the mixture was washed with EtOAc. Concentration and column chromatography (hexane/EtOAc = 3:1) gave triol **50** (11.1 mg, quant): colorless oil;  $R_f = 0.22$  (hexane/EtOAc = 3:1);  $[\alpha]_{\text{D}}^{22} +32.0$  ( $c$  0.62,  $\text{CHCl}_3$ ); IR (neat) 3436, 2951, 2929, 2894, 2857  $\text{cm}^{-1}$ ;  $^1\text{H}$  NMR (400 MHz,  $\text{CDCl}_3$ )  $\delta$  4.65–4.64 (m, 1 H), 4.61 (s, 2 H), 4.02 (dt,  $J = 10.1, 2.6$  Hz, 1 H), 3.92–3.82 (m, 3 H), 3.54–3.53 (m, 1 H), 3.52 (t,  $J = 6.4$  Hz, 2 H), 3.38–3.33 (m, 1 H), 3.35 (s, 3 H), 3.29 (s, 3 H), 3.15 (t,  $J = 8.2$  Hz, 1 H), 2.38–2.31 (m, 1 H), 2.03 (ddd,  $J = 13.0, 4.6, 1.9$  Hz, 1 H), 1.66–1.40 (m, 10 H), 0.89 (s, 9 H), 0.89 (s, 9 H), 0.89 (s, 9 H), 0.10 (s, 3 H), 0.09 (s, 3 H), 0.08 (s, 3 H), 0.07 (s, 3 H), 0.07 (s, 3 H), 0.07 (s, 3 H);  $^{13}\text{C}$  NMR (100 MHz,

CDCl<sub>3</sub>)  $\delta$  98.3, 96.4, 77.1, 74.1, 73.6, 71.3, 70.4, 70.1, 69.5, 67.7, 55.2, 55.1, 39.5, 38.9, 37.5, 36.7, 29.7, 26.3, 26.1, 25.8, 22.1, 18.3, 18.0, 17.9, -2.8, -3.1, -3.9, -3.9, -4.3, -4.8; HRMS (ESI-TOF) calcd for C<sub>36</sub>H<sub>78</sub>O<sub>10</sub>Si<sub>3</sub>Na [M + Na]<sup>+</sup> 777.4800, found 777.4804.

**Candidate Compound 4a.** To a solution of tris-TBS ether **50** (11.3 mg, 15.0  $\mu$ mol) in THF (0.3 mL) was added TBAF (1.0 M in THF, 90  $\mu$ L, 90.0  $\mu$ mol) at room temperature. The mixture was stirred at the same temperature for 5 h. To the mixture was added TBAF (1.0 M in THF, 90  $\mu$ L, 90.0  $\mu$ mol) at room temperature. The mixture was stirred at 40 °C for 3 h. The mixture was filtered through short column chromatography (CH<sub>2</sub>Cl<sub>2</sub>/MeOH = 7:1). Concentration and column chromatography (EtOAc, EtOAc/MeOH = 5:1) gave candidate compound **4a** (3.8 mg, 61%): colorless oil;  $R_f$  = 0.33 (CH<sub>2</sub>Cl<sub>2</sub>/MeOH = 5:1);  $[\alpha]_D^{22}$  +57.3 (*c* 0.19, CH<sub>3</sub>OH); IR (neat) 3409, 2960, 2925, 2854 cm<sup>-1</sup>; <sup>1</sup>H NMR (600 MHz, CD<sub>3</sub>OD)  $\delta$  4.73 (d, *J* = 3.0 Hz, 1 H), 4.58 (s, 2 H), 4.00–3.97 (m, 1 H), 3.94–3.91 (m, 1 H), 3.82–3.78 (m, 1 H), 3.74 (ddd, *J* = 11.4, 9.1, 5.0 Hz, 1 H), 3.62 (td, *J* = 9.1, 3.0 Hz, 1 H), 3.52 (t, *J* = 6.5 Hz, 2 H), 3.37–3.36 (m, 1 H), 3.33 (s, 3 H), 3.32 (s, 3 H), 3.06 (t, *J* = 9.1 Hz, 1 H), 2.23 (ddd, *J* = 14.4, 6.0, 3.0 Hz, 1 H), 2.03 (ddd, *J* = 13.3, 5.0, 1.2 Hz, 1 H), 1.74–1.43 (m, 10 H); <sup>13</sup>C NMR (150 MHz, CD<sub>3</sub>OD)  $\delta$  99.9, 97.4, 77.5, 75.9, 72.9, 71.9, 71.1, 71.0, 69.6, 68.8, 55.4, 55.4, 41.3, 38.9, 38.2, 36.9, 30.8, 23.2; HRMS (ESI-TOF) calcd for C<sub>18</sub>H<sub>36</sub>O<sub>10</sub>Na [M + Na]<sup>+</sup> 435.2206, found 435.2203.

**Candidate Compound 4b.** To a solution of diol **49** (6.2 mg, 7.08  $\mu$ mol) in CH<sub>2</sub>Cl<sub>2</sub> (0.2 mL) were added DMAP (1.0 mg, 8.19  $\mu$ mol), pyridine (25  $\mu$ L, 0.315 mmol), and Ac<sub>2</sub>O (22  $\mu$ L, 0.236 mmol) at room temperature. The mixture was stirred at the same temperature for 16 h. To the mixture were added DMAP (1.0 mg, 8.19  $\mu$ mol), pyridine (25  $\mu$ L, 0.315 mmol), and Ac<sub>2</sub>O (22  $\mu$ L, 0.236 mmol) at room temperature. The mixture was stirred at the same temperature for 5 h. The reaction was quenched with saturated aqueous NH<sub>4</sub>Cl. The mixture was diluted with EtOAc, washed with H<sub>2</sub>O and brine, and then dried over Na<sub>2</sub>SO<sub>4</sub>. Concentration and short column chromatography (hexane/EtOAc = 4:1) gave the corresponding diacetate (6.5 mg), which was used for the next step without further purification.

A mixture of the BOM ether obtained above (6.5 mg) and 20% Pd(OH)<sub>2</sub>/C (1.3 mg) in MeOH (0.2 mL) was stirred at room temperature for 40 min under H<sub>2</sub> atmosphere. The catalyst was filtered off and the mixture was washed with EtOAc. Concentration gave the corresponding alcohol (4.5 mg), which was used for the next step without further purification.

To a mixture of the alcohol obtained above (4.5 mg), Ph<sub>3</sub>P (5.6 mg, 21.4  $\mu$ mol), and *p*-NO<sub>2</sub>PhCO<sub>2</sub>H (3.6 mg, 21.4  $\mu$ mol) in THF (0.2 mL) was added DEAD (2.2 M in toluene, 9.7  $\mu$ L, 21.4  $\mu$ mol) at 0 °C. The mixture was stirred at the same temperature for 2 h. The reaction was quenched with saturated aqueous NH<sub>4</sub>Cl. The mixture was diluted with EtOAc, washed with H<sub>2</sub>O and brine, and then dried over Na<sub>2</sub>SO<sub>4</sub>. Concentration and short column chromatography (hexane/EtOAc = 7:1, 4:1) gave *p*-nitrobenzoate **51** (3.8 mg), which was used

for the next step without further purification.

To a solution of triester **51** obtained above (3.8 mg) in MeOH (0.2 mL) was added NaOMe (1.0 mg, 18.5  $\mu\text{mol}$ ) at 0 °C. The mixture was stirred at room temperature for 14 h. The reaction was quenched with DOWEX 50WX4. The mixture was filtered and washed with EtOAc. Concentration and short column chromatography (hexane/EtOAc = 4:1, 1:1) gave the corresponding triol (2.8 mg), which was used for the next step without further purification.

To a solution of the tris-TBS ether obtained above (2.8 mg) in THF (0.2 mL) was added TBAF (1.0 M in THF, 21  $\mu\text{L}$ , 21.0  $\mu\text{mol}$ ) at room temperature. The mixture was stirred at the same temperature for 14 h and at 40 °C for 8 h. The mixture was filtered through short column chromatography (EtOAc/MeOH = 5:1). Concentration and column chromatography (EtOAc, EtOAc/MeOH = 5:1) gave candidate compound **4b** (1.5 mg, 51% in five steps): colorless oil;  $R_f$  = 0.30 (CH<sub>2</sub>Cl<sub>2</sub>/MeOH = 5:1);  $[\alpha]_D^{22}$  +67.3 (*c* 0.070, CH<sub>3</sub>OH); IR (neat) 3398, 2959, 2925, 2851 cm<sup>-1</sup>; <sup>1</sup>H NMR (600 MHz, CD<sub>3</sub>OD)  $\delta$  4.73 (d, *J* = 3.5 Hz, 1 H), 4.59 (s, 2 H), 3.99–3.97 (m, 2 H), 3.84–3.80 (m, 1 H), 3.74 (ddd, *J* = 11.4, 9.2, 5.0 Hz, 1 H), 3.61 (td, *J* = 9.2, 2.8 Hz, 1 H), 3.52 (t, *J* = 6.5 Hz, 2 H), 3.33 (s, 3 H), 3.32 (s, 3 H), 3.31–3.30 (m, 1 H), 3.06 (t, *J* = 9.2 Hz, 1 H), 2.23 (ddd, *J* = 14.4, 6.0, 2.8 Hz, 1 H), 2.04 (ddd, *J* = 13.1, 5.0, 0.6 Hz, 1 H), 1.69–1.46 (m, 10 H); <sup>13</sup>C NMR (150 MHz, CD<sub>3</sub>OD)  $\delta$  99.9, 97.4, 77.5, 76.8, 71.7, 71.1, 70.8, 69.6, 69.0, 68.8, 55.4, 55.4, 42.2, 39.0, 38.9, 36.9, 30.8, 23.5; HRMS (ESI-TOF) calcd for C<sub>18</sub>H<sub>36</sub>O<sub>10</sub>Na [M + Na]<sup>+</sup> 435.2206, found 435.2207.

**Triol 53.** A mixture of alkyne **45** (9.2 mg, 12.7  $\mu\text{mol}$ ) and Lindlar cat (palladium 5% on calcium carbonate poisoned with lead, 3.4 mg) in MeOH (3.0 mL) was stirred at room temperature for 3 h under H<sub>2</sub> atmosphere. The catalyst was filtered off and the mixture was washed with EtOAc. Concentration gave allylic alcohol **52** (10.4 mg), which was used for the next step without further purification.

To a solution of allylic alcohol **52** obtained above (10.4 mg) in pyridine (0.2 mL) was added OsO<sub>4</sub> (0.05 M in CH<sub>2</sub>Cl<sub>2</sub>, 0.4 mL, 20.0  $\mu\text{mol}$ ) at room temperature. The mixture was stirred at the same temperature for 2 h. To the mixture were added NaHSO<sub>3</sub> (136 mg), H<sub>2</sub>O (0.6 mL), and pyridine (0.6 mL) at room temperature. The mixture was stirred at the same temperature for 1 h. The mixture was diluted with EtOAc and washed with H<sub>2</sub>O and brine. The aqueous phase was extracted with EtOAc three times and the combined organic phase was dried over Na<sub>2</sub>SO<sub>4</sub>. Concentration and column chromatography (hexane/EtOAc = 2:1) gave triol **53** (5.1 mg, 53% in two steps) and its C76,C77-epimer (4.3 mg, 44% in two steps). Triol **53**: colorless oil;  $R_f$  = 0.37 (CH<sub>2</sub>Cl<sub>2</sub>/MeOH = 20:1);  $[\alpha]_D^{22}$  +20.8 (*c* 2.01, CHCl<sub>3</sub>); IR (neat) 3486, 2952, 2928, 2900, 2858 cm<sup>-1</sup>; <sup>1</sup>H NMR (400 MHz, CDCl<sub>3</sub>)  $\delta$  7.37–7.29 (m, 5 H), 4.84 (d, *J* = 6.8 Hz, 1 H), 4.80 (d, *J* = 6.8 Hz, 1 H), 4.71 (d, *J* = 1.9 Hz, 1 H), 4.64 (s, 2 H), 4.60 (s, 2 H), 4.06 (brs, 1 H), 4.01–3.78 (m, 6 H), 3.50 (t, *J* = 6.5 Hz, 2 H), 3.42 (t, *J* = 6.7 Hz, 1 H), 3.35 (s, 3 H), 3.35 (s, 3 H), 3.21 (t, *J* = 8.4 Hz, 1 H), 2.89 (brs, 1 H), 2.47 (d, *J* = 14.6 Hz, 1 H), 2.08 (ddd, *J* = 13.6, 4.8,

1.6 Hz, 1 H), 1.97 (dt,  $J = 14.8, 2.8$  Hz, 1 H), 1.79 (dt,  $J = 14.8, 8.8$  Hz, 1 H), 1.69–1.43 (m, 9 H), 0.90 (s, 9 H), 0.88 (s, 9 H), 0.10 (s, 3 H), 0.10 (s, 3 H), 0.09 (s, 3 H), 0.08 (s, 3 H);  $^{13}\text{C}$  NMR (100 MHz,  $\text{CDCl}_3$ )  $\delta$  137.4, 128.4, 127.8, 98.5, 96.4, 93.4, 77.9, 75.7, 74.4, 74.1, 72.6, 70.3, 70.1, 67.6, 55.1, 55.1, 38.9, 37.1, 34.4, 30.0, 26.3, 26.2, 21.4, 18.4, 18.1, -2.7, -3.0, -3.8, -4.2; HRMS (ESI-TOF) calcd for  $\text{C}_{38}\text{H}_{72}\text{O}_{11}\text{Si}_2\text{Na}$   $[\text{M} + \text{Na}]^+$  783.4511, found 783.4507.

**Stereochemical Determination of 53.** Triol **53** was treated with *p*-MeOC<sub>6</sub>H<sub>4</sub>CH(OMe)<sub>2</sub>/PPTS/MS5Å to give *p*-methoxybenzylidene acetal **S12** in 61% yield (Scheme S6). The observed coupling constants ( $^3J_{75,76}$  and  $^3J_{76,77} = 9.4$  Hz) in **S12** indicate that H-75, H-76, and H-77 possess the axial orientations. The stereochemistry at the acetal carbon of **S12** was elucidated by the NOE correlations as shown in arrows.

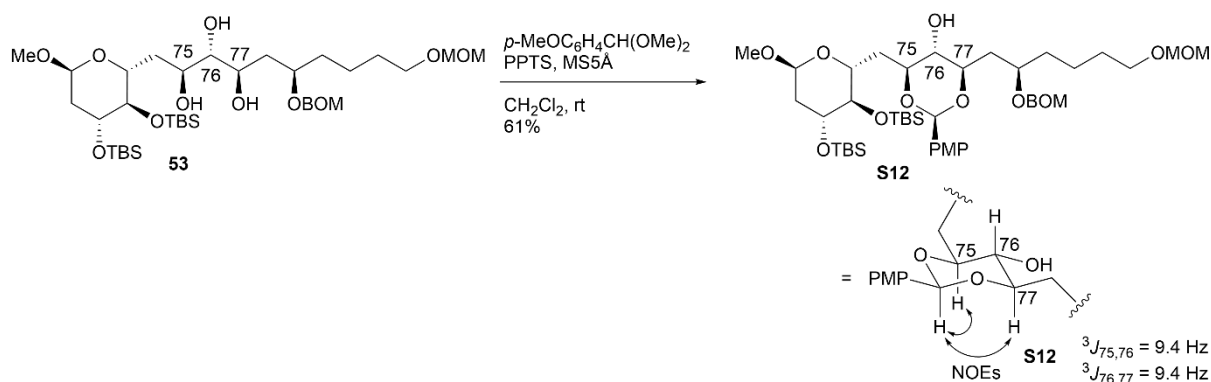

**Scheme S6.** Stereochemical determination of triol **53**.

***p*-Methoxybenzylidene Acetal S12.** To a solution of triol **53** (14.8 mg, 19.4  $\mu\text{mol}$ ) in  $\text{CH}_2\text{Cl}_2$  (0.3 mL) were added MS5Å (24.0 mg), *p*-MeOC<sub>6</sub>H<sub>4</sub>CH(OMe)<sub>2</sub> (5.0  $\mu\text{L}$ , 29.1  $\mu\text{mol}$ ), and PPTS (0.5 mg, 1.94  $\mu\text{mol}$ ) at room temperature. The mixture was stirred at the same temperature for 1 h. The reaction was quenched with  $\text{Et}_3\text{N}$ . The mixture was diluted with EtOAc, washed with  $\text{H}_2\text{O}$  and brine, and then dried over  $\text{Na}_2\text{SO}_4$ . Concentration and column chromatography (hexane/EtOAc = 8:1, 4:1) gave *p*-methoxybenzylidene acetal **S12** (10.5 mg, 61%): colorless oil;  $R_f = 0.23$  (hexane/EtOAc = 3:1);  $[\alpha]_{\text{D}}^{22} +50.8$  ( $c$  0.021,  $\text{CHCl}_3$ ); IR (neat) 3429, 2956, 2926, 2855  $\text{cm}^{-1}$ ;  $^1\text{H}$  NMR (600 MHz,  $\text{C}_6\text{D}_6$ )  $\delta$  7.62 (d,  $J = 8.6$  Hz, 2 H), 7.34–7.03 (m, 5 H), 6.82 (d,  $J = 8.6$  Hz, 2 H), 5.57 (s, 1 H), 4.78 (d,  $J = 7.2$  Hz, 1 H), 4.68 (d,  $J = 7.2$  Hz, 1 H), 4.59 (s, 2 H), 4.49 (s, 2 H), 4.49 (s, 1 H), 4.20–4.17 (m, 2 H), 4.09–4.05 (m, 1 H), 3.94–3.86 (m, 2 H), 3.64 (td,  $J = 9.1, 3.2$  Hz, 1 H), 3.49–3.48 (m, 1 H), 3.43 (t,  $J = 6.0$  Hz, 2 H), 3.25 (s, 3 H), 3.18 (s, 3 H), 3.18 (s, 3 H), 2.57 (ddd,  $J = 14.6, 5.7, 2.3$  Hz, 1 H), 2.32 (ddd,  $J = 14.6, 5.7, 4.9$  Hz, 1 H), 2.26–2.21 (m, 1 H), 2.15–2.07 (m, 2 H), 1.75–1.51 (m, 8 H), 1.06 (s, 9 H), 0.99 (s, 9 H), 0.25 (s, 3 H), 0.21 (s, 3 H), 0.12 (s, 3 H), 0.11 (s, 3 H);  $^{13}\text{C}$  NMR (150 MHz,  $\text{C}_6\text{D}_6$ )  $\delta$  128.6, 128.3, 128.1, 128.0, 127.9, 113.7, 101.1, 98.6, 96.6, 93.8, 79.4, 78.7, 77.0, 75.5, 71.6, 71.5, 70.8, 69.8, 67.8, 55.2, 54.9, 54.7, 39.6, 37.9, 35.5, 34.7, 30.3, 26.6, 26.5, 22.6, 18.6, 18.5, -2.3,



-2.7, -3.7, -3.9; HRMS (ESI-TOF) calcd for C<sub>46</sub>H<sub>78</sub>O<sub>12</sub>Si<sub>2</sub>Na [M + Na]<sup>+</sup> 901.4930, found 901.4932.

**Tetraol 54.** A mixture of BOM ether **53** (21.7 mg, 28.5 μmol) and 20% Pd(OH)<sub>2</sub>/C (4.2 mg) in MeOH (1.0 mL) was stirred at room temperature for 1 h under H<sub>2</sub> atmosphere. The catalyst was filtered off and the mixture was washed with EtOAc. Concentration and column chromatography (CH<sub>2</sub>Cl<sub>2</sub>/MeOH = 30:1) gave tetraol **54** (14.0 mg, 76%): colorless oil; *R<sub>f</sub>* = 0.58 (CH<sub>2</sub>Cl<sub>2</sub>/MeOH = 10:1); [α]<sub>D</sub><sup>24</sup> +31.8 (*c* 0.70, CHCl<sub>3</sub>); IR (neat) 3435, 2952, 2929, 2899, 2858 cm<sup>-1</sup>; <sup>1</sup>H NMR (400 MHz, CDCl<sub>3</sub>) δ 4.71 (d, *J* = 2.2 Hz, 1 H), 4.61 (s, 2 H), 4.11 (s, 1 H), 3.98–3.85 (m, 4 H), 3.79 (t, *J* = 9.2 Hz, 1 H), 3.53 (t, *J* = 6.5 Hz, 2 H), 3.41 (t, *J* = 6.8 Hz, 1 H), 3.36 (s, 3 H), 3.34 (s, 3 H), 3.22 (t, *J* = 8.5 Hz, 1 H), 2.84 (brs, 1 H), 2.48 (d, *J* = 14.4 Hz, 1 H), 2.08 (ddd, *J* = 13.2, 5.9, 1.3 Hz, 1 H), 1.89 (d, *J* = 14.4 Hz, 1 H), 1.68–1.43 (m, 10 H), 0.90 (s, 9 H), 0.89 (s, 9 H), 0.11 (s, 3 H), 0.10 (s, 3 H), 0.08 (s, 3 H), 0.07 (s, 3 H); <sup>13</sup>C NMR (100 MHz, CDCl<sub>3</sub>) δ 98.5, 96.4, 76.9, 75.7, 74.9, 74.3, 73.9, 71.8, 70.2, 67.7, 55.2, 55.1, 38.8, 38.7, 38.1, 34.6, 29.6, 26.3, 26.1, 22.1, 18.4, 18.1, -2.6, -3.0, -3.8, -4.2; HRMS (ESI-TOF) calcd for C<sub>30</sub>H<sub>64</sub>O<sub>10</sub>Si<sub>2</sub>Na [M + Na]<sup>+</sup> 663.3936, found 663.3932.

**Candidate Compound 4c.** To a solution of bis-TBS ether **54** (14.0 mg, 21.8 μmol) in THF (1.0 mL) was added TBAF (1.0 M in THF, 65 μL, 65.0 μmol) at room temperature. The mixture was stirred at the same temperature for 19 h. The mixture was filtered through short column chromatography (CH<sub>2</sub>Cl<sub>2</sub>/MeOH = 7:1). Concentration and column chromatography (CH<sub>2</sub>Cl<sub>2</sub>/MeOH = 7:1) gave candidate compound **4c** (7.0 mg, 78%): colorless oil; *R<sub>f</sub>* = 0.57 (CH<sub>2</sub>Cl<sub>2</sub>/MeOH = 4:1); [α]<sub>D</sub><sup>21</sup> +52.3 (*c* 0.36, CH<sub>3</sub>OH); IR (neat) 3304, 2931, 2895, 2871, 2834 cm<sup>-1</sup>; <sup>1</sup>H NMR (600 MHz, CD<sub>3</sub>OD) δ 4.76 (d, *J* = 2.4 Hz, 1 H), 4.59 (s, 2 H), 3.87–3.85 (m, 3 H), 3.77–3.70 (m, 2 H), 3.52 (t, *J* = 6.6 Hz, 2 H), 3.40 (t, *J* = 6.3 Hz, 1 H), 3.35 (s, 3 H), 3.33 (s, 3 H), 3.07 (t, *J* = 9.3 Hz, 1 H), 2.34 (dt, *J* = 14.4, 2.7 Hz, 1 H), 2.04 (ddd, *J* = 13.2, 5.4, 0.6 Hz, 1 H), 1.84 (ddd, *J* = 14.4, 4.5, 2.7 Hz, 1 H), 1.64–1.52 (m, 7 H), 1.48–1.41 (m, 2 H); <sup>13</sup>C NMR (150 MHz, CD<sub>3</sub>OD) δ 99.9, 97.4, 78.2, 77.5, 73.1, 73.0, 72.4, 71.5, 69.5, 68.8, 55.4, 55.3, 39.8, 38.8, 38.2, 36.2, 30.9, 23.2; HRMS (ESI-TOF) calcd for C<sub>18</sub>H<sub>36</sub>O<sub>10</sub>Na [M + Na]<sup>+</sup> 435.2206, found 435.2203.

**Tetraol 56.** To a solution of triol **53** (33.5 mg, 44.0 μmol) in CH<sub>2</sub>Cl<sub>2</sub> (0.5 mL) were added pyridine (21 μL, 0.264 mmol), Ac<sub>2</sub>O (19 μL, 0.198 mmol), and DMAP (1.0 mg, 8.19 μmol) at 0 °C. The mixture was stirred at room temperature for 2 h. To the mixture were added pyridine (10 μL, 0.126 mmol) and Ac<sub>2</sub>O (9.0 μL, 93.8 μmol) at room temperature. The mixture was stirred at the same temperature for 3 h. The reaction was quenched with saturated aqueous NH<sub>4</sub>Cl. The mixture was diluted with EtOAc, washed with H<sub>2</sub>O and brine, and then dried over Na<sub>2</sub>SO<sub>4</sub>. Concentration and short column chromatography (hexane/EtOAc = 4:1) gave the

corresponding triacetate (36.0 mg), which was used for the next step without further purification. A mixture of the BOM ether obtained above (36.0 mg) and 20% Pd(OH)<sub>2</sub>/C (10.3 mg) in EtOH (2.0 mL) was stirred at room temperature for 2 h under H<sub>2</sub> atmosphere. The catalyst was filtered off and the mixture was washed with EtOAc. Concentration gave the corresponding alcohol (31.7 mg), which was used for the next step without further purification.

To a mixture of the alcohol obtained above (31.7 mg), Ph<sub>3</sub>P (43.3 mg, 0.165 mmol), and *p*-NO<sub>2</sub>PhCO<sub>2</sub>H (27.6 mg, 0.165 mmol) in THF (0.5 mL) was added DEAD (2.2 M in toluene, 75 μL, 0.165 mmol) at 0 °C. The mixture was stirred at the same temperature for 30 min. The reaction was quenched with saturated aqueous NH<sub>4</sub>Cl. The mixture was diluted with EtOAc, washed with H<sub>2</sub>O and brine, and then dried over Na<sub>2</sub>SO<sub>4</sub>. Concentration and short column chromatography (hexane/EtOAc = 3:1) gave *p*-nitrobenzoate **55** (27.5 mg), which was used for the next step without further purification.

To a solution of tetraester **55** obtained above (27.5 mg) in MeOH (1.0 mL) was added NaOMe (13.8 mg, 0.255 mmol) at 0 °C. The mixture was stirred at room temperature for 2 h. The reaction was quenched with DOWEX 50WX4. The mixture was filtered and washed with EtOAc. Concentration and column chromatography (CH<sub>2</sub>Cl<sub>2</sub>/MeOH = 30:1) gave tetraol **56** (16.7 mg, 59% in four steps): colorless oil; *R*<sub>f</sub> = 0.55 (CH<sub>2</sub>Cl<sub>2</sub>/MeOH = 10:1); [α]<sub>D</sub><sup>23</sup> +37.7 (*c* 0.44, CHCl<sub>3</sub>); IR (neat) 3435, 2952, 2930, 2897, 2858 cm<sup>-1</sup>; <sup>1</sup>H NMR (400 MHz, CDCl<sub>3</sub>) δ 4.71 (s, 1 H), 4.62 (s, 2 H), 4.03–3.88 (m, 4 H), 3.79 (t, *J* = 9.9 Hz, 1 H), 3.54 (t, *J* = 6.3 Hz, 2 H), 3.48 (t, *J* = 6.5 Hz, 1 H), 3.36 (s, 3 H), 3.35 (s, 3 H), 3.22 (t, *J* = 8.4 Hz, 1 H), 2.46 (d, *J* = 14.2 Hz, 1 H), 2.08 (dd, *J* = 13.2, 4.2 Hz, 1 H), 1.82 (t, *J* = 5.4 Hz, 2 H), 1.67–1.44 (m, 9 H), 0.90 (s, 9 H), 0.89 (s, 9 H), 0.11 (s, 3 H), 0.11 (s, 3 H), 0.08 (s, 3 H), 0.08 (s, 3 H); <sup>13</sup>C NMR (100 MHz, CDCl<sub>3</sub>) δ 98.5, 96.4, 76.9, 75.5, 75.2, 74.3, 71.5, 70.2, 69.7, 67.7, 55.2, 55.1, 38.8, 37.2, 34.4, 29.6, 26.3, 26.2, 22.5, 18.4, 18.1, -2.7, -3.0, -3.8, -4.2; HRMS (ESI-TOF) calcd for C<sub>30</sub>H<sub>64</sub>O<sub>10</sub>Si<sub>2</sub>Na [M + Na]<sup>+</sup> 663.3936, found 663.3937.

**Candidate Compound 4d.** To a solution of bis-TBS ether **56** (14.4 mg, 22.5 μmol) in THF (1.0 mL) was added TBAF (1.0 M in THF, 68 μL, 68.0 μmol) at room temperature. The mixture was stirred at the same temperature for 8 h. To the mixture was added TBAF (1.0 M in THF, 68 μL, 68.0 μmol) at room temperature. The mixture was stirred at the same temperature for 15 h. The mixture was filtered through short column chromatography (CH<sub>2</sub>Cl<sub>2</sub>/MeOH = 7:1). Concentration and column chromatography (CH<sub>2</sub>Cl<sub>2</sub>/MeOH = 7:1) gave candidate compound **4d** (7.5 mg, 81%): colorless oil; *R*<sub>f</sub> = 0.59 (CH<sub>2</sub>Cl<sub>2</sub>/MeOH = 4:1); [α]<sub>D</sub><sup>23</sup> +67.9 (*c* 0.38, CH<sub>3</sub>OH); IR (neat) 3398, 2928, 2849 cm<sup>-1</sup>; <sup>1</sup>H NMR (600 MHz, CD<sub>3</sub>OD) δ 4.76 (d, *J* = 3.0 Hz, 1 H), 4.59 (s, 2 H), 3.93 (ddd, *J* = 9.6, 6.3, 2.4 Hz, 1 H), 3.89 (ddd, *J* = 7.8, 6.3, 3.0 Hz, 1 H), 3.86–3.82 (m, 1 H), 3.78–3.71 (m, 2 H), 3.52 (t, *J* = 6.6 Hz, 2 H), 3.41 (t, *J* = 6.3 Hz, 1 H), 3.35 (s, 3 H), 3.33 (s, 3 H), 3.08 (t, *J* = 9.3 Hz, 1 H), 2.33 (dt, *J* = 14.7, 3.0 Hz, 1 H), 2.05 (ddd, *J* = 13.2, 5.4, 1.2 Hz, 1 H), 1.72 (ddd, *J* = 14.4, 10.2, 2.4 Hz, 1 H), 1.66–1.48 (m, 9 H); <sup>13</sup>C NMR (150

MHz, CD<sub>3</sub>OD)  $\delta$  99.9, 97.4, 78.5, 77.5, 73.2, 72.4, 70.6, 69.6, 69.1, 68.8, 55.4, 55.3, 40.5, 39.1, 38.8, 36.0, 30.8, 23.5; HRMS (ESI-TOF) calcd for C<sub>18</sub>H<sub>36</sub>O<sub>10</sub>Na [M + Na]<sup>+</sup> 435.2206, found 435.2211.

**Allylic Alcohol 57.** To a solution of propargylic alcohol **46** (45.0 mg, 62.1  $\mu$ mol) in Et<sub>2</sub>O (1.0 mL) was added Red-Al (65% in toluene, 0.19 mL, 0.621 mmol) at 0 °C. The mixture was stirred at reflux for 3 h. The reaction was quenched with saturated aqueous sodium potassium tartrate at 0 °C. The mixture was diluted with EtOAc, washed with H<sub>2</sub>O and brine, and then dried over Na<sub>2</sub>SO<sub>4</sub>. Concentration and column chromatography (hexane/EtOAc = 4:1) gave allylic alcohol **57** (33.9 mg, 75%): colorless oil;  $R_f$  = 0.60 (hexane/EtOAc = 2:1);  $[\alpha]_D^{22}$  +48.7 (*c* 1.13, CHCl<sub>3</sub>); IR (neat) 3478, 2977, 2952, 2931, 2884, 2859 cm<sup>-1</sup>; <sup>1</sup>H NMR (400 MHz, CDCl<sub>3</sub>)  $\delta$  7.34–7.26 (m, 5 H), 5.75–5.68 (m, 1 H), 5.58 (dd, *J* = 15.6, 5.6 Hz, 1 H), 4.81 (d, *J* = 7.1 Hz, 1 H), 4.77 (d, *J* = 7.1 Hz, 1 H), 4.68 (brs, 1 H), 4.62 (s, 2 H), 4.60 (s, 2 H), 4.37 (brs, 1 H), 3.93 (ddd, *J* = 10.8, 7.6, 4.4 Hz, 1 H), 3.83 (td, *J* = 10.0, 2.0 Hz, 1 H), 3.71–3.65 (m, 1 H), 3.51 (t, *J* = 6.4 Hz, 2 H), 3.34 (s, 3 H), 3.33 (s, 3 H), 3.23 (t, *J* = 8.4 Hz, 1 H), 2.52 (d, *J* = 5.4 Hz, 1 H), 2.31 (t, *J* = 6.4 Hz, 2 H), 2.06 (ddd, *J* = 13.1, 4.8, 2.0 Hz, 1 H), 1.99 (ddd, *J* = 14.0, 8.0, 2.0 Hz, 1 H), 1.71–1.38 (m, 7 H), 0.90 (s, 9 H), 0.89 (s, 9 H), 0.10 (s, 3 H), 0.10 (s, 3 H), 0.08 (s, 3 H), 0.07 (s, 3 H); <sup>13</sup>C NMR (100 MHz, CDCl<sub>3</sub>)  $\delta$  137.9, 135.4, 128.3, 127.7, 127.6, 126.6, 98.2, 96.3, 93.4, 76.5, 70.7, 70.0, 69.5, 69.4, 67.7, 55.1, 55.0, 38.9, 38.5, 37.3, 34.0, 29.9, 26.3, 26.2, 22.2, 18.4, 18.2, -2.6, -3.0, -3.8, -4.1; HRMS (ESI-TOF) calcd for C<sub>38</sub>H<sub>70</sub>O<sub>9</sub>Si<sub>2</sub>Na [M + Na]<sup>+</sup> 749.4456, found 749.4460.

**Triol 58.** To a mixture of allylic alcohol **57** (64.4 mg, 88.6  $\mu$ mol) and TMEDA (13  $\mu$ L, 0.107 mmol) in CH<sub>2</sub>Cl<sub>2</sub> (6.8 mL) was added OsO<sub>4</sub> (0.05 M in CH<sub>2</sub>Cl<sub>2</sub>, 2.1 mL, 0.105 mmol) at -78 °C. The mixture was stirred at the same temperature for 2 h. To the mixture were added TMEDA (13  $\mu$ L, 0.107 mmol) and OsO<sub>4</sub> (0.05 M in CH<sub>2</sub>Cl<sub>2</sub>, 2.1 mL, 0.105 mmol) at -78 °C. The mixture was stirred at the same temperature for 1 h. The mixture was warmed up to room temperature. To the mixture was added ethylenediamine (30  $\mu$ L, 0.445 mmol) at room temperature. The mixture was stirred at the same temperature for 48 h. The mixture was diluted with EtOAc and washed with brine. The aqueous phase was extracted with EtOAc three times and the combined organic phase was dried over Na<sub>2</sub>SO<sub>4</sub>. Concentration and column chromatography (hexane/EtOAc = 2:1) gave triol **58** (32.3 mg, 47%) and its C<sub>76</sub>,C<sub>77</sub>-epimer (26.3 mg, 39%). Triol **58**: colorless oil;  $R_f$  = 0.37 (hexane/EtOAc = 1:2);  $[\alpha]_D^{22}$  +30.4 (*c* 0.98, CHCl<sub>3</sub>); IR (neat) 3436, 2953, 2930, 2890, 2858 cm<sup>-1</sup>; <sup>1</sup>H NMR (400 MHz, CDCl<sub>3</sub>)  $\delta$  7.37–7.27 (m, 5 H), 4.83 (d, *J* = 7.1 Hz, 1 H), 4.79 (d, *J* = 7.1 Hz, 1 H), 4.68–4.67 (m, 1 H), 4.63 (s, 2 H), 4.60 (s, 2 H), 4.12 (d, *J* = 7.8 Hz, 1 H), 3.99–3.90 (m, 3 H), 3.85 (t, *J* = 8.8 Hz, 1 H), 3.62 (s, 1 H), 3.50 (t, *J* = 6.5 Hz, 2 H), 3.34 (s, 3 H), 3.32 (s, 3 H), 3.23 (t, *J* = 8.3 Hz, 1 H), 2.97 (d, *J* = 7.8 Hz, 1 H), 2.86 (d, *J* = 8.8 Hz, 1 H), 2.13–2.04 (m, 2 H), 2.00 (dt, *J* = 14.4, 8.8 Hz, 1 H), 1.73–1.55 (m, 8

H), 1.47–1.39 (m, 2 H), 0.90 (s, 9 H), 0.89 (s, 9 H), 0.11 (s, 3 H), 0.10 (s, 3 H), 0.08 (s, 3 H), 0.08 (s, 3 H);  $^{13}\text{C}$  NMR (100 MHz,  $\text{CDCl}_3$ )  $\delta$  137.3, 128.4, 127.8, 98.1, 96.4, 93.2, 78.0, 75.4, 70.9, 70.8, 70.0, 69.6, 67.5, 55.1, 54.9, 39.0, 37.9, 35.6, 34.2, 29.9, 26.3, 26.2, 21.6, 18.4, 18.1, -2.7, -3.0, -3.8, -4.1; HRMS (ESI-TOF) calcd for  $\text{C}_{38}\text{H}_{72}\text{O}_{11}\text{Si}_2\text{Na}$  [ $\text{M} + \text{Na}$ ] $^+$  783.4511, found 783.4514.

**Stereochemical Determination of 58.** Triol **58** was treated with *p*- $\text{MeOC}_6\text{H}_4\text{CH}(\text{OMe})_2$ /PPTS/MS5Å to give *p*-methoxybenzylidene acetal **S13** in 53% yield (Scheme S7). The stereochemistries at the C76 and C77 positions were determined by the observed NOEs of H-75/H-76, H75/H-77, and H-76/H-77. The stereochemistry at the acetal carbon of **S13** was elucidated by the NOE correlations as shown in arrows.

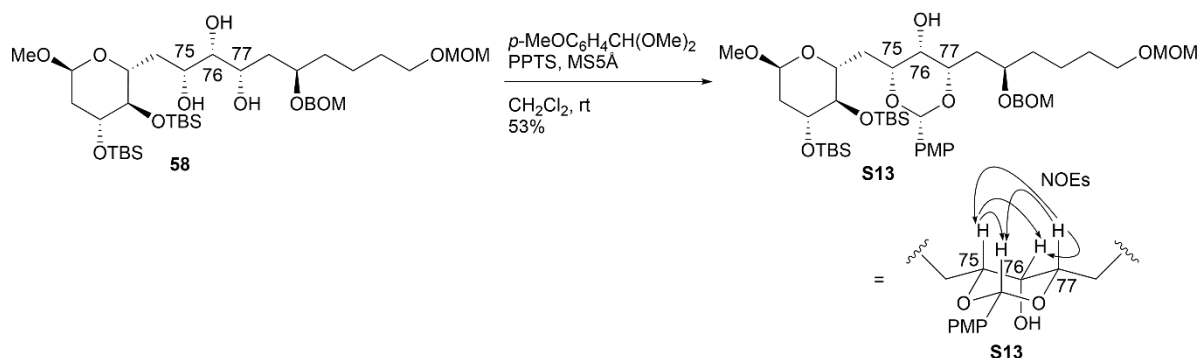

**Scheme S7.** Stereochemical determination of triol **58**.

***p*-Methoxybenzylidene Acetal S13.** To a solution of triol **58** (4.4 mg, 5.78  $\mu\text{mol}$ ) in  $\text{CH}_2\text{Cl}_2$  (0.2 mL) were added MS5Å (6.6 mg), *p*- $\text{MeOC}_6\text{H}_4\text{CH}(\text{OMe})_2$  (3.0  $\mu\text{L}$ , 17.5  $\mu\text{mol}$ ), and PPTS (0.5 mg, 1.94  $\mu\text{mol}$ ) at room temperature. The mixture was stirred at the same temperature for 2 h. The reaction was quenched with  $\text{Et}_3\text{N}$ . The mixture was diluted with  $\text{EtOAc}$ , washed with  $\text{H}_2\text{O}$  and brine, and then dried over  $\text{Na}_2\text{SO}_4$ . Concentration and column chromatography (hexane/ $\text{EtOAc}$  = 8:1, 4:1) gave *p*-methoxybenzylidene acetal **S13** (2.7 mg, 53%): colorless oil;  $R_f$  = 0.38 (hexane/ $\text{EtOAc}$  = 2:1); IR (neat) 3436, 2976, 2928, 2898, 2858  $\text{cm}^{-1}$ ;  $^1\text{H}$  NMR (400 MHz,  $\text{CDCl}_3$ )  $\delta$  7.37–7.23 (m, 7 H), 6.87 (d,  $J$  = 8.8 Hz, 2 H), 5.84 (s, 1 H), 4.84 (d,  $J$  = 6.8 Hz, 1 H), 4.78 (d,  $J$  = 6.8 Hz, 1 H), 4.67–4.65 (m, 1 H), 4.64 (s, 2 H), 4.59 (s, 2 H), 4.35–4.30 (m, 1 H), 3.98–3.87 (m, 3 H), 3.81 (s, 3 H), 3.78–3.75 (m, 2 H), 3.51 (t,  $J$  = 6.4 Hz, 2 H), 3.34 (s, 3 H), 3.30 (s, 3 H), 3.22 (t,  $J$  = 8.4 Hz, 1 H), 2.90 (d,  $J$  = 4.8 Hz, 1 H), 2.15–2.01 (m, 3 H), 1.82–1.47 (m, 9 H), 0.90 (s, 9 H), 0.83 (s, 9 H), 0.09 (s, 3 H), 0.08 (s, 3 H), 0.08 (s, 3 H), 0.04 (s, 3 H);  $^{13}\text{C}$  NMR (150 MHz,  $\text{CDCl}_3$ )  $\delta$  137.9, 129.7, 128.4, 128.0, 127.8, 127.6, 113.6, 102.4, 98.2, 96.4, 93.8, 77.1, 76.9, 76.5, 76.0, 75.6, 70.6, 69.9, 69.8, 69.6, 67.6, 55.3, 55.0, 38.9, 34.5, 34.2, 30.3, 29.7, 26.3, 26.1, 22.1, 18.3, 18.0, -2.8, -3.1, -3.9, -4.3; HRMS (ESI-TOF) calcd for  $\text{C}_{46}\text{H}_{78}\text{O}_{12}\text{Si}_2\text{Na}$  [ $\text{M} + \text{Na}$ ] $^+$  901.4930, found 901.4927.

**Tetraol 59.** A mixture of BOM ether **58** (2.7 mg, 3.55  $\mu\text{mol}$ ) and 20% Pd(OH)<sub>2</sub>/C (1.0 mg) in MeOH (0.5 mL) was stirred at room temperature for 30 min under H<sub>2</sub> atmosphere. The catalyst was filtered off and the mixture was washed with EtOAc. Concentration and column chromatography (CH<sub>2</sub>Cl<sub>2</sub>/MeOH = 30:1) gave tetraol **59** (2.2 mg, 97%): colorless oil;  $R_f$  = 0.57 (CH<sub>2</sub>Cl<sub>2</sub>/MeOH = 10:1);  $[\alpha]_D^{23}$  +47.9 ( $c$  0.48, CHCl<sub>3</sub>); IR (neat) 3418, 2952, 2930, 2897, 2857 cm<sup>-1</sup>; <sup>1</sup>H NMR (400 MHz, CDCl<sub>3</sub>)  $\delta$  4.69–4.68 (m, 1 H), 4.62 (s, 2 H), 4.17 (d,  $J$  = 9.5 Hz, 1 H), 3.99–3.93 (m, 4 H), 3.85 (td,  $J$  = 10.0, 2.0 Hz, 1 H), 3.54 (t,  $J$  = 6.4 Hz, 2 H), 3.36 (s, 3 H), 3.32 (s, 3 H), 3.25 (t,  $J$  = 8.2 Hz, 1 H), 3.10 (d,  $J$  = 5.6 Hz, 1 H), 2.97 (brs, 1 H), 2.13–2.04 (m, 3 H), 1.84 (dt,  $J$  = 14.4, 10.0 Hz, 1 H), 1.68–1.44 (m, 9 H), 0.91 (s, 9 H), 0.90 (s, 9 H), 0.12 (s, 3 H), 0.10 (s, 3 H), 0.09 (s, 3 H), 0.09 (s, 3 H); <sup>13</sup>C NMR (100 MHz, CDCl<sub>3</sub>)  $\delta$  98.1, 96.4, 76.5, 75.3, 72.3, 72.1, 71.1, 70.8, 69.8, 67.7, 55.2, 54.9, 39.7, 38.8, 38.0, 35.2, 29.6, 26.3, 26.2, 22.1, 18.4, 18.2, -2.7, -3.0, -3.9, -4.1; HRMS (ESI-TOF) calcd for C<sub>30</sub>H<sub>64</sub>O<sub>10</sub>Si<sub>2</sub>Na [M + Na]<sup>+</sup> 663.3936, found 663.3934.

**Candidate Compound 4e.** To a solution of bis-TBS ether **59** (17.4 mg, 27.1  $\mu\text{mol}$ ) in THF (1.0 mL) was added TBAF (1.0 M in THF, 81  $\mu\text{L}$ , 81.0  $\mu\text{mol}$ ) at room temperature. The mixture was stirred at the same temperature for 6 h. To the mixture was added TBAF (1.0 M in THF, 81  $\mu\text{L}$ , 81.0  $\mu\text{mol}$ ) at room temperature. The mixture was stirred at the same temperature for 14 h. The mixture was filtered through short column chromatography (CH<sub>2</sub>Cl<sub>2</sub>/MeOH = 7:1). Concentration and column chromatography (EtOAc, EtOAc/MeOH = 5:1) gave candidate compound **4e** (6.4 mg, 57%): colorless oil;  $R_f$  = 0.52 (CH<sub>2</sub>Cl<sub>2</sub>/MeOH = 3:1);  $[\alpha]_D^{22}$  +65.4 ( $c$  0.32, CH<sub>3</sub>OH); IR (neat) 3338, 2934 cm<sup>-1</sup>; <sup>1</sup>H NMR (600 MHz, CD<sub>3</sub>OD)  $\delta$  4.72 (d,  $J$  = 3.0 Hz, 1 H), 4.59 (s, 2 H), 4.07–4.05 (m, 1 H), 3.91–3.88 (m, 1 H), 3.80–3.73 (m, 3 H), 3.52 (t,  $J$  = 6.3 Hz, 2 H), 3.33 (s, 3 H), 3.33 (s, 3 H), 3.22–3.21 (m, 1 H), 3.02 (t,  $J$  = 9.3 Hz, 1 H), 2.05 (ddd,  $J$  = 12.9, 5.4, 0.9 Hz, 1 H), 1.94 (ddd,  $J$  = 14.3, 10.2, 2.4 Hz, 1 H), 1.81 (ddd,  $J$  = 14.3, 9.8, 2.0 Hz, 1 H), 1.75–1.40 (m, 9 H); <sup>13</sup>C NMR (150 MHz, CD<sub>3</sub>OD)  $\delta$  99.6, 97.4, 77.5, 77.5, 71.0, 70.4, 69.9, 69.5, 69.3, 68.8, 55.4, 55.1, 41.5, 39.0, 38.4, 37.0, 30.8, 23.2; HRMS (ESI-TOF) calcd for C<sub>18</sub>H<sub>36</sub>O<sub>10</sub>Na [M + Na]<sup>+</sup> 435.2206, found 435.2203.

**Tetraol 61.** To a solution of triol **58** (37.5 mg, 49.3  $\mu\text{mol}$ ) in CH<sub>2</sub>Cl<sub>2</sub> (0.5 mL) were added pyridine (24  $\mu\text{L}$ , 0.296 mmol), Ac<sub>2</sub>O (21  $\mu\text{L}$ , 0.222 mmol), and DMAP (1.0 mg, 8.19  $\mu\text{mol}$ ) at 0 °C. The mixture was stirred at room temperature for 1 h. The reaction was quenched with saturated aqueous NH<sub>4</sub>Cl. The mixture was diluted with EtOAc, washed with H<sub>2</sub>O and brine, and then dried over Na<sub>2</sub>SO<sub>4</sub>. Concentration and short column chromatography (hexane/EtOAc = 4:1) gave the corresponding triacetate (42.7 mg), which was used for the next step without further purification.

A mixture of the BOM ether obtained above (42.7 mg) and 20% Pd(OH)<sub>2</sub>/C (4.3 mg) in EtOH

(1.0 mL) was stirred at room temperature for 30 min under H<sub>2</sub> atmosphere. The catalyst was filtered off and the mixture was washed with EtOAc. Concentration gave the corresponding alcohol (30.3 mg), which was used for the next step without further purification.

To a mixture of the alcohol obtained above (30.3 mg), Ph<sub>3</sub>P (41.4 mg, 0.158 mmol), and *p*-NO<sub>2</sub>PhCO<sub>2</sub>H (26.4 mg, 0.158 mmol) in THF (0.5 mL) was added DEAD (2.2 M in toluene, 72 μL, 0.158 mmol) at 0 °C. The mixture was stirred at the same temperature for 3 h. The reaction was quenched with saturated aqueous NH<sub>4</sub>Cl. The mixture was diluted with EtOAc, washed with H<sub>2</sub>O and brine, and then dried over Na<sub>2</sub>SO<sub>4</sub>. Concentration and short column chromatography (hexane/EtOAc = 3:1) gave *p*-nitrobenzoate **60** (31.1 mg), which was used for the next step without further purification.

To a solution of tetraester **60** obtained above (31.1 mg) in MeOH (1.0 mL) was added NaOMe (2.7 mg, 50.9 μmol) at 0 °C. The mixture was stirred at room temperature for 2 h. The reaction was quenched with DOWEX 50WX4. The mixture was filtered and washed with EtOAc. Concentration and column chromatography (CH<sub>2</sub>Cl<sub>2</sub>/MeOH = 30:1) gave tetraol **61** (18.7 mg, 59% in four steps): colorless oil; *R*<sub>f</sub> = 0.51 (CH<sub>2</sub>Cl<sub>2</sub>/MeOH = 10:1); [α]<sub>D</sub><sup>22</sup> +41.1 (*c* 0.94, CHCl<sub>3</sub>); IR (neat) 3434, 2978, 2952, 2930, 2897, 2883, 2858 cm<sup>-1</sup>; <sup>1</sup>H NMR (400 MHz, CDCl<sub>3</sub>) δ 4.68 (s, 1 H), 4.61 (s, 2 H), 4.23 (d, *J* = 9.3 Hz, 1 H), 4.02–3.92 (m, 4 H), 3.84 (t, *J* = 9.2 Hz, 1 H), 3.53 (t, *J* = 6.4 Hz, 2 H), 3.35 (s, 3 H), 3.31 (s, 3 H), 3.25 (t, *J* = 8.3 Hz, 1 H), 2.13–2.04 (m, 2 H), 2.00–1.93 (m, 1 H), 1.67–1.40 (m, 9 H), 0.90 (s, 9 H), 0.90 (s, 9 H), 0.11 (s, 3 H), 0.10 (s, 3 H), 0.08 (s, 3 H), 0.08 (s, 3 H); <sup>13</sup>C NMR (100 MHz, CDCl<sub>3</sub>) δ 98.2, 96.4, 76.5, 75.4, 71.1, 70.7, 69.8, 69.4, 68.7, 67.7, 55.2, 54.9, 39.5, 38.8, 37.1, 35.0, 29.7, 26.3, 26.2, 22.6, 18.4, 18.2, -2.7, -3.0, -3.9, -4.1; HRMS (ESI-TOF) calcd for C<sub>30</sub>H<sub>64</sub>O<sub>10</sub>Si<sub>2</sub>Na [M + Na]<sup>+</sup> 663.3936, found 663.3938.

**Candidate Compound 4f.** To a solution of bis-TBS ether **61** (10.4 mg, 16.2 μmol) in THF (1.0 mL) was added TBAF (1.0 M in THF, 49 μL, 49.0 μmol) at room temperature. The mixture was stirred at the same temperature for 15 h. To the mixture was added TBAF (1.0 M in THF, 60 μL, 60.0 μmol) at room temperature. The mixture was stirred at the same temperature for 8 h. The mixture was filtered through short column chromatography (CH<sub>2</sub>Cl<sub>2</sub>/MeOH = 7:1). Concentration and column chromatography (EtOAc, EtOAc/MeOH = 5:1) gave candidate compound **4f** (4.4 mg, 66%): white solid; *R*<sub>f</sub> = 0.29 (CH<sub>2</sub>Cl<sub>2</sub>/MeOH = 5:1); [α]<sub>D</sub><sup>18</sup> +63.7 (*c* 0.22, CH<sub>3</sub>OH); IR (neat) 3366, 2963, 2925, 2854 cm<sup>-1</sup>; <sup>1</sup>H NMR (600 MHz, CD<sub>3</sub>OD) δ 4.72 (d, *J* = 3.2 Hz, 1 H), 4.59 (s, 2 H), 4.11 (dt, *J* = 10.1, 2.8 Hz, 1 H), 3.90 (ddd, *J* = 10.1, 7.1, 2.2 Hz, 1 H), 3.84–3.73 (m, 3 H), 3.53 (t, *J* = 6.5 Hz, 2 H), 3.33 (s, 3 H), 3.33 (s, 3 H), 3.20–3.18 (m, 1 H), 3.02 (t, *J* = 9.2 Hz, 1 H), 2.05 (ddd, *J* = 13.1, 5.3, 1.2 Hz, 1 H), 1.96 (ddd, *J* = 13.7, 10.1, 2.2 Hz, 1 H), 1.81 (ddd, *J* = 13.7, 10.1, 2.2 Hz, 1 H), 1.75 (ddd, *J* = 14.2, 10.1, 2.8 Hz, 1 H), 1.63–1.41 (m, 8 H); <sup>13</sup>C NMR (150 MHz, CD<sub>3</sub>OD) δ 99.6, 97.4, 78.6, 77.5, 69.9, 69.6, 69.5, 69.2, 68.8, 68.6, 55.4, 55.1, 42.3, 39.0, 39.0, 36.8, 30.8, 23.5; HRMS (ESI-TOF) calcd for

C<sub>18</sub>H<sub>36</sub>O<sub>10</sub>Na [M + Na]<sup>+</sup> 435.2206, found 435.2204.

**Triol 63.** A mixture of alkyne **46** (102 mg, 0.141 mmol) and Lindlar cat (palladium 5% on calcium carbonate poisoned with lead, 102 mg) in EtOAc (1.4 mL) was stirred at room temperature for 2 h under H<sub>2</sub> atmosphere. The catalyst was filtered off and the mixture was washed with EtOAc. Concentration gave allylic alcohol **62** (75.0 mg), which was used for the next step without further purification.

To a solution of allylic alcohol **62** obtained above (75.0 mg) in pyridine (1.0 mL) was added OsO<sub>4</sub> (0.05 M in CH<sub>2</sub>Cl<sub>2</sub>, 2.7 mL, 0.135 mmol) at room temperature. The mixture was stirred at the same temperature for 20 min. To the mixture were added NaHSO<sub>3</sub> (666 mg), H<sub>2</sub>O (3.6 mL), and pyridine (3.2 mL) at room temperature. The mixture was stirred at the same temperature for 4 h. The mixture was diluted with EtOAc and washed with H<sub>2</sub>O and brine. The aqueous phase was extracted with EtOAc three times and the combined organic phase was dried over Na<sub>2</sub>SO<sub>4</sub>. Concentration and column chromatography (hexane/EtOAc = 1:1) gave triol **63** (36.5 mg, 34% in two steps) and its C76,C77-epimer (27.5 mg, 26% in two steps). Triol **63**: colorless oil; *R<sub>f</sub>* = 0.44 (hexane/EtOAc = 1:2); [ $\alpha$ ]<sub>D</sub><sup>21</sup> +22.7 (*c* 1.83, CHCl<sub>3</sub>); IR (neat) 3456, 2972, 2955, 2930, 2899, 2884, 2860 cm<sup>-1</sup>; <sup>1</sup>H NMR (400 MHz, CDCl<sub>3</sub>)  $\delta$  7.37–7.28 (m, 5 H), 4.85 (d, *J* = 6.8 Hz, 1 H), 4.79 (d, *J* = 6.8 Hz, 1 H), 4.69–4.68 (m, 1 H), 4.64 (s, 1 H), 4.62 (s, 1 H), 4.60 (s, 2 H), 4.17 (d, *J* = 9.0 Hz, 1 H), 3.99–3.91 (m, 3 H), 3.80 (td, *J* = 9.6, 2.0 Hz, 1 H), 3.69 (s, 1 H), 3.50 (t, *J* = 6.4 Hz, 2 H), 3.34 (s, 3 H), 3.33 (s, 3 H), 3.25 (t, *J* = 9.2 Hz, 1 H), 2.98 (d, *J* = 2.9 Hz, 1 H), 2.74 (d, *J* = 8.0 Hz, 1 H), 2.24 (ddd, *J* = 14.0, 10.0, 2.0 Hz, 1 H), 2.07 (ddd, *J* = 13.2, 4.8, 2.0 Hz, 1 H), 1.89 (ddd, *J* = 14.8, 3.6, 2.0 Hz, 1 H), 1.74 (dt, *J* = 14.8, 9.2 Hz, 1 H), 1.69–1.55 (m, 6 H), 1.53–1.38 (m, 3 H), 0.91 (s, 9 H), 0.90 (s, 9 H), 0.11 (s, 3 H), 0.10 (s, 3 H), 0.08 (s, 3 H), 0.08 (s, 3 H); <sup>13</sup>C NMR (100 MHz, CDCl<sub>3</sub>)  $\delta$  137.3, 128.4, 127.8, 127.7, 98.0, 96.4, 93.1, 78.2, 76.5, 75.9, 73.8, 70.8, 70.1, 69.7, 67.5, 55.1, 54.8, 39.0, 37.8, 35.7, 34.2, 29.9, 26.3, 26.2, 21.6, 18.4, 18.2, -2.7, -3.0, -3.8, -4.1; HRMS (ESI-TOF) calcd for C<sub>38</sub>H<sub>72</sub>O<sub>11</sub>Si<sub>2</sub>Na [M + Na]<sup>+</sup> 783.4511, found 783.4510.

**Stereochemical Determination of 63.** Triol **63** was treated with Me<sub>2</sub>C(OMe)<sub>2</sub>/PPTS/MS5Å to give acetonide **S14** in 25% yield along with acetonide **S15** in 41% yield. (Scheme S8). The obtained alcohol **S14** was transformed to (*S*)-MTPA ester **S16** and (*R*)-MTPA ester **S17**, and the stereochemistry at the C77 position of **S14** was determined the modified Mosher method<sup>1</sup> (Figure S4). The absolute configuration at the C76 position of **63** was elucidated based on the *syn*-addition reaction mechanism of OsO<sub>4</sub>-catalyzed dihydroxylation.

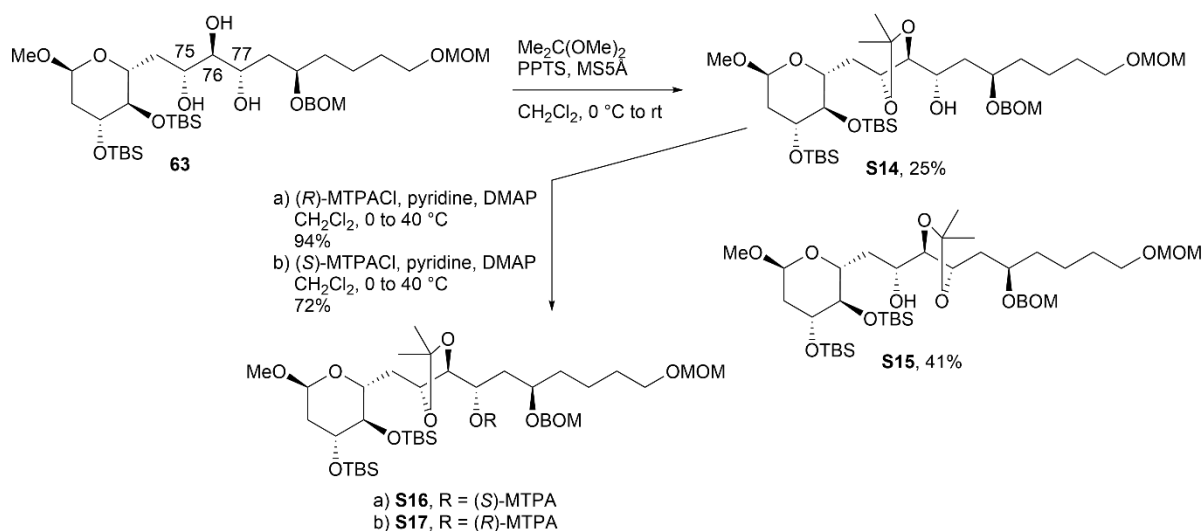

**Scheme S8.** Transformation of triol **63** for its stereochemical determination.

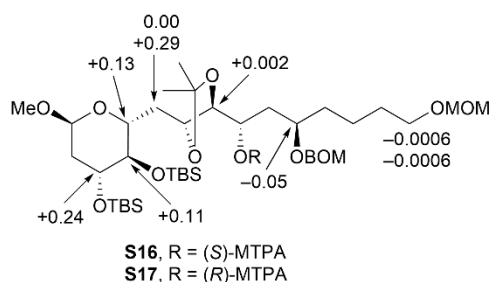

**Figure S4.** Chemical shift differences ( $\Delta\delta_{S-R}$ ) of MTPA esters **S16** and **S17**.

**Acetonide S14.** To a solution of triol **63** (8.5 mg, 11.2  $\mu\text{mol}$ ) in  $\text{CH}_2\text{Cl}_2$  (0.2 mL) were added MS5Å (19.2 mg),  $\text{Me}_2\text{C}(\text{OMe})_2$  (14  $\mu\text{L}$ , 0.112 mmol), and PPTS (1.1 mg, 4.48  $\mu\text{mol}$ ) at 0 °C. The mixture was stirred at room temperature for 11 h. The reaction was quenched with saturated aqueous  $\text{NaHCO}_3$ . The mixture was diluted with EtOAc, washed with  $\text{H}_2\text{O}$  and brine, and then dried over  $\text{Na}_2\text{SO}_4$ . Concentration and column chromatography (hexane/EtOAc = 4:1) gave acetonide **S14** (2.2 mg, 25%) and acetonide **S15** (3.7 mg, 41%). Acetonide **S14**: colorless oil;  $R_f$  = 0.51 (hexane/EtOAc = 2:1);  $[\alpha]_{\text{D}}^{22} +54.0$  ( $c$  0.11,  $\text{CHCl}_3$ ); IR (neat) 3478, 2952, 2928, 2857  $\text{cm}^{-1}$ ;  $^1\text{H}$  NMR (400 MHz,  $\text{CDCl}_3$ )  $\delta$  7.34–7.28 (m, 5 H), 4.79 (d,  $J$  = 7.1 Hz, 1 H), 4.76 (d,  $J$  = 7.1 Hz, 1 H), 4.65–4.64 (m, 1 H), 4.63 (s, 1 H), 4.62 (s, 1 H), 4.60 (s, 2 H), 4.28–4.24 (m, 1 H), 3.98–3.92 (m, 1 H), 3.90–3.77 (m, 4 H), 3.51 (t,  $J$  = 6.5 Hz, 2 H), 3.34 (s, 3 H), 3.30 (s, 3 H), 3.17 (t,  $J$  = 8.6 Hz, 1 H), 2.12–2.04 (m, 3 H), 1.93 (d,  $J$  = 6.6 Hz, 1 H), 1.85–1.79 (m, 1 H), 1.65–1.49 (m, 8 H), 1.45 (s, 3 H), 1.34 (s, 3 H), 0.91 (s, 9 H), 0.91 (s, 9 H), 0.11 (s, 3 H), 0.10 (s, 3 H), 0.08 (s, 3 H), 0.08 (s, 3 H);  $^{13}\text{C}$  NMR (100 MHz,  $\text{CDCl}_3$ )  $\delta$  137.8, 128.3, 127.7, 127.6, 107.8, 97.9, 96.4, 93.4, 80.7, 75.3, 74.1, 70.9, 69.6, 68.5, 67.7, 66.1, 55.1, 54.5, 39.2, 37.4, 34.2, 33.9, 29.9, 27.5, 26.4, 26.2, 25.2, 22.0, 18.4, 18.2, -2.6, -3.0, -3.8, -4.1; HRMS (ESI-TOF) calcd for  $\text{C}_{41}\text{H}_{76}\text{O}_{11}\text{Si}_2\text{Na}$   $[\text{M} + \text{Na}]^+$  823.4824, found 823.4824.



**(S)-MTPA Ester S16.** To a solution of alcohol **S14** (2.1 mg, 2.62  $\mu\text{mol}$ ) in  $\text{CH}_2\text{Cl}_2$  (0.2 mL) were added DMAP (2.0 mg, 16.4  $\mu\text{mol}$ ), pyridine (1.4  $\mu\text{L}$ , 17.3  $\mu\text{mol}$ ), and (*R*)-MTPACl (2.0  $\mu\text{L}$ , 10.7  $\mu\text{mol}$ ) at 0 °C. The mixture was stirred at 40 °C for 2 h. The reaction was quenched with saturated aqueous  $\text{NH}_4\text{Cl}$ . The mixture was diluted with EtOAc, washed with  $\text{H}_2\text{O}$  and brine, and then dried over  $\text{Na}_2\text{SO}_4$ . Concentration and column chromatography (hexane/EtOAc = 7:1) gave (*S*)-MTPA ester **S16** (2.5 mg, 94%): colorless oil;  $R_f$  = 0.60 (hexane/EtOAc = 2:1);  $[\alpha]_{\text{D}}^{24}$  +38.1 (*c* 0.13,  $\text{CHCl}_3$ ); IR (neat) 2953, 2927, 2858, 1753  $\text{cm}^{-1}$ ;  $^1\text{H}$  NMR (400 MHz,  $\text{CDCl}_3$ )  $\delta$  7.64–7.62 (m, 2 H), 7.38–7.28 (m, 8 H), 5.55 (t,  $J$  = 8.8 Hz, 1 H), 4.78 (d,  $J$  = 6.8 Hz, 1 H), 4.74 (d,  $J$  = 6.8 Hz, 1 H), 4.62 (s, 2 H), 4.62–4.60 (m, 1 H), 4.60 (s, 2 H), 4.14–4.09 (m, 1 H), 4.06 (dd,  $J$  = 8.3, 5.6 Hz, 1 H), 3.90–3.84 (m, 2 H), 3.58 (s, 3 H), 3.52 (t,  $J$  = 6.4 Hz, 2 H), 3.50–3.46 (m, 1 H), 3.35 (s, 3 H), 3.19 (s, 3 H), 3.11 (t,  $J$  = 8.3 Hz, 1 H), 2.28–2.22 (m, 1 H), 2.04–2.00 (m, 1 H), 1.99–1.90 (m, 1 H), 1.61–1.38 (m, 9 H), 1.42 (s, 3 H), 1.22 (s, 3 H), 0.91 (s, 9 H), 0.87 (s, 9 H), 0.11 (s, 3 H), 0.10 (s, 3 H), 0.09 (s, 3 H), 0.04 (s, 3 H);  $^{13}\text{C}$  NMR (100 MHz,  $\text{CDCl}_3$ )  $\delta$  165.7, 137.7, 132.2, 129.3, 128.4, 128.0, 127.8, 127.7, 127.6, 108.7, 98.2, 96.4, 93.4, 79.0, 74.9, 73.9, 71.4, 70.6, 69.6, 68.5, 67.7, 55.5, 55.2, 55.1, 39.2, 34.3, 34.0, 33.6, 30.0, 29.8, 28.0, 26.4, 26.1, 25.9, 22.1, 18.4, 18.0, –2.7, –2.9, –3.8, –4.1; HRMS (ESI–TOF) calcd for  $\text{C}_{51}\text{H}_{83}\text{F}_3\text{O}_{13}\text{Si}_2\text{Na}$   $[\text{M} + \text{Na}]^+$  1039.5222, found 1039.5219.

**(R)-MTPA Ester S17.** To a solution of alcohol **S14** (2.2 mg, 2.75  $\mu\text{mol}$ ) in  $\text{CH}_2\text{Cl}_2$  (0.2 mL) were added DMAP (2.0 mg, 16.4  $\mu\text{mol}$ ), pyridine (1.4  $\mu\text{L}$ , 17.3  $\mu\text{mol}$ ), and (*S*)-MTPACl (2.0  $\mu\text{L}$ , 10.7  $\mu\text{mol}$ ) at 0 °C. The mixture was stirred at 40 °C for 1 h. The reaction was quenched with saturated aqueous  $\text{NH}_4\text{Cl}$ . The mixture was diluted with EtOAc, washed with  $\text{H}_2\text{O}$  and brine, and then dried over  $\text{Na}_2\text{SO}_4$ . Concentration and column chromatography (hexane/EtOAc = 7:1) gave (*R*)-MTPA ester **S17** (2.0 mg, 72%): colorless oil;  $R_f$  = 0.46 (hexane/EtOAc = 3:1);  $[\alpha]_{\text{D}}^{21}$  +65.0 (*c* 0.10,  $\text{CHCl}_3$ ); IR (neat) 2953, 2927, 2854, 1754  $\text{cm}^{-1}$ ;  $^1\text{H}$  NMR (400 MHz,  $\text{CDCl}_3$ )  $\delta$  7.65–7.63 (m, 2 H), 7.37–7.27 (m, 8 H), 5.58 (t,  $J$  = 9.4 Hz, 1 H), 4.80 (d,  $J$  = 6.8 Hz, 1 H), 4.75 (d,  $J$  = 6.8 Hz, 1 H), 4.63 (s, 2 H), 4.61–4.60 (m, 1 H), 4.60 (s, 2 H), 4.19–4.14 (m, 1 H), 4.06 (dd,  $J$  = 8.8, 5.6 Hz, 1 H), 3.91–3.85 (m, 1 H), 3.78–3.72 (m, 1 H), 3.62 (s, 3 H), 3.52 (t,  $J$  = 6.5 Hz, 2 H), 3.36 (s, 3 H), 3.35 (s, 3 H), 3.24 (t,  $J$  = 9.6 Hz, 1 H), 3.00 (t,  $J$  = 8.4 Hz, 1 H), 2.12–1.98 (m, 3 H), 1.74–1.52 (m, 9 H), 1.43 (s, 3 H), 1.31 (s, 3 H), 0.91 (s, 9 H), 0.76 (s, 9 H), 0.10 (s, 3 H), 0.07 (s, 3 H), 0.03 (s, 3 H), 0.02 (s, 3 H);  $^{13}\text{C}$  NMR (100 MHz,  $\text{CDCl}_3$ )  $\delta$  166.0, 137.7, 132.7, 129.3, 128.4, 128.1, 127.9, 127.6, 127.4, 108.8, 98.4, 96.4, 93.4, 79.1, 74.9, 74.1, 70.7, 70.5, 69.6, 68.5, 67.7, 55.7, 55.1, 39.2, 34.6, 34.0, 33.6, 29.9, 29.8, 28.1, 26.4, 26.0, 22.0, 18.4, 18.0, 14.2, –2.7, –3.0, –3.9, –4.2; HRMS (ESI–TOF) calcd for  $\text{C}_{51}\text{H}_{83}\text{F}_3\text{O}_{13}\text{Si}_2\text{Na}$   $[\text{M} + \text{Na}]^+$  1039.5222, found 1039.5217.

**Tetraol 64.** A mixture of BOM ether **63** (7.1 mg, 9.33  $\mu\text{mol}$ ) and 20%  $\text{Pd}(\text{OH})_2/\text{C}$  (1.0 mg) in

MeOH (1.0 mL) was stirred at room temperature for 40 min under H<sub>2</sub> atmosphere. The catalyst was filtered off and the mixture was washed with EtOAc. Concentration and column chromatography (CH<sub>2</sub>Cl<sub>2</sub>/MeOH = 30:1) gave tetraol **64** (5.7 mg, 95%): colorless oil; *R<sub>f</sub>* = 0.54 (CH<sub>2</sub>Cl<sub>2</sub>/MeOH = 10:1); [ $\alpha$ ]<sub>D</sub><sup>22</sup> +36.5 (*c* 0.29, CHCl<sub>3</sub>); IR (neat) 3417, 2952, 2929, 2897, 2857 cm<sup>-1</sup>; <sup>1</sup>H NMR (400 MHz, CDCl<sub>3</sub>)  $\delta$  4.69 (s, 1 H), 4.62 (s, 2 H), 4.16 (d, *J* = 9.0 Hz, 1 H), 4.00–3.90 (m, 4 H), 3.80 (td, *J* = 9.6, 2.0 Hz, 1 H), 3.54 (t, *J* = 6.4 Hz, 2 H), 3.36 (s, 3 H), 3.33 (s, 3 H), 3.27 (t, *J* = 8.4 Hz, 1 H), 3.08 (brs, 1 H), 2.26–2.20 (m, 1 H), 2.08 (dd, *J* = 13.0, 4.5 Hz, 1 H), 1.77 (d, *J* = 14.6 Hz, 1 H), 1.68–1.43 (m, 10 H), 0.91 (s, 9 H), 0.90 (s, 9 H), 0.11 (s, 3 H), 0.10 (s, 3 H), 0.08 (s, 3 H), 0.07 (s, 3 H); <sup>13</sup>C NMR (100 MHz, CDCl<sub>3</sub>)  $\delta$  98.1, 96.4, 76.3, 75.7, 75.3, 72.9, 70.8, 69.9, 67.9, 67.7, 55.2, 54.9, 39.3, 38.9, 38.0, 35.3, 29.6, 26.4, 26.2, 22.1, 18.4, 18.2, -2.6, -3.0, -3.8, -4.1; HRMS (ESI-TOF) calcd for C<sub>30</sub>H<sub>64</sub>O<sub>10</sub>Si<sub>2</sub>Na [M + Na]<sup>+</sup> 663.3936, found 663.3939.

**Candidate Compound 4g.** To a solution of bis-TBS ether **64** (18.1 mg, 28.2  $\mu$ mol) in THF (1.0 mL) was added TBAF (1.0 M in THF, 0.14 mL, 0.140 mmol) at room temperature. The mixture was stirred at the same temperature for 7 h. To the mixture was added TBAF (1.0 M in THF, 0.14 mL, 0.140 mmol) at room temperature. The mixture was stirred at the same temperature for 17 h. The mixture was filtered through short column chromatography (CH<sub>2</sub>Cl<sub>2</sub>/MeOH = 7:1). Concentration and column chromatography (EtOAc, EtOAc/MeOH = 5:1) gave candidate compound **4g** (8.1 mg, 70%): colorless oil; *R<sub>f</sub>* = 0.50 (CH<sub>2</sub>Cl<sub>2</sub>/MeOH = 3:1); [ $\alpha$ ]<sub>D</sub><sup>22</sup> +75.5 (*c* 0.41, CH<sub>3</sub>OH); IR (neat) 3366, 2934 cm<sup>-1</sup>; <sup>1</sup>H NMR (600 MHz, CD<sub>3</sub>OD)  $\delta$  4.72 (d, *J* = 3.0 Hz, 1 H), 4.59 (s, 2 H), 4.10 (dt, *J* = 10.2, 2.4 Hz, 1 H), 3.86–3.83 (m, 1 H), 3.82–3.78 (m, 1 H), 3.78–3.75 (m, 1 H), 3.73 (td, *J* = 9.3, 2.4 Hz, 1 H), 3.53 (t, *J* = 6.6 Hz, 2 H), 3.34 (s, 3 H), 3.33 (s, 3 H), 3.18 (dd, *J* = 7.8, 2.4 Hz, 1 H), 3.00 (t, *J* = 9.3 Hz, 1 H), 2.22 (ddd, *J* = 14.4, 10.2, 2.4 Hz, 1 H), 2.06–2.03 (m, 1 H), 1.92 (ddd, *J* = 13.8, 4.2, 2.4 Hz, 1 H), 1.65–1.41 (m, 9 H); <sup>13</sup>C NMR (150 MHz, CD<sub>3</sub>OD)  $\delta$  99.6, 97.4, 78.4, 77.5, 72.3, 71.8, 69.9, 69.6, 68.8, 67.8, 55.4, 55.1, 41.3, 39.0, 38.2, 37.5, 30.9, 23.2; HRMS (ESI-TOF) calcd for C<sub>18</sub>H<sub>36</sub>O<sub>10</sub>Na [M + Na]<sup>+</sup> 435.2206, found 435.2206.

**Tetraol 66.** To a solution of triol **63** (12.5 mg, 16.4  $\mu$ mol) in CH<sub>2</sub>Cl<sub>2</sub> (0.2 mL) were added pyridine (7.9  $\mu$ L, 98.4  $\mu$ mol), Ac<sub>2</sub>O (7.0  $\mu$ L, 73.8  $\mu$ mol), and DMAP (1.0 mg, 8.19  $\mu$ mol) at 0 °C. The mixture was stirred at room temperature for 1 h. The reaction was quenched with saturated aqueous NH<sub>4</sub>Cl. The mixture was diluted with EtOAc, washed with H<sub>2</sub>O and brine, and then dried over Na<sub>2</sub>SO<sub>4</sub>. Concentration and short column chromatography (hexane/EtOAc = 4:1) gave the corresponding triacetate (13.6 mg), which was used for the next step without further purification.

A mixture of the BOM ether obtained above (13.6 mg) and 20% Pd(OH)<sub>2</sub>/C (1.4 mg) in EtOH (1.0 mL) was stirred at room temperature for 30 min under H<sub>2</sub> atmosphere. The catalyst was

filtered off and the mixture was washed with EtOAc. Concentration gave the corresponding alcohol (12.6 mg), which was used for the next step without further purification.

To a mixture of the alcohol obtained above (12.6 mg), Ph<sub>3</sub>P (17.2 mg, 65.6 μmol), and *p*-NO<sub>2</sub>PhCO<sub>2</sub>H (11.0 mg, 65.6 μmol) in THF (0.2 mL) was added DEAD (2.2 M in toluene, 30 μL, 66.0 μmol) at 0 °C. The mixture was stirred at the same temperature for 2 h. The reaction was quenched with saturated aqueous NH<sub>4</sub>Cl. The mixture was diluted with EtOAc, washed with H<sub>2</sub>O and brine, and then dried over Na<sub>2</sub>SO<sub>4</sub>. Concentration and short column chromatography (hexane/EtOAc = 3:1) gave *p*-nitrobenzoate **65** (12.4 mg), which was used for the next step without further purification.

To a solution of tetraester **65** obtained above (12.4 mg) in MeOH (1.0 mL) was added NaOMe (1.1 mg, 20.4 μmol) at 0 °C. The mixture was stirred at room temperature for 2 h. The reaction was quenched with DOWEX 50WX4. The mixture was filtered and washed with EtOAc. Concentration and column chromatography (CH<sub>2</sub>Cl<sub>2</sub>/MeOH = 30:1) gave tetraol **68** (6.7 mg, 64% in four steps): colorless oil; *R*<sub>f</sub> = 0.46 (CH<sub>2</sub>Cl<sub>2</sub>/MeOH = 10:1); [α]<sub>D</sub><sup>23</sup> +42.8 (*c* 0.34, CHCl<sub>3</sub>); IR (neat) 3412, 2952, 2930, 2896, 2860 cm<sup>-1</sup>; <sup>1</sup>H NMR (400 MHz, CDCl<sub>3</sub>) δ 4.70–4.69 (m, 1 H), 4.62 (s, 2 H), 4.18 (d, *J* = 9.8 Hz, 1 H), 4.03–3.94 (m, 3 H), 3.80 (td, *J* = 9.2, 2.8 Hz, 1 H), 3.54 (t, *J* = 6.3 Hz, 2 H), 3.36 (s, 3 H), 3.36–3.33 (m, 1 H), 3.33 (s, 3 H), 3.29 (t, *J* = 8.0 Hz, 1 H), 3.02 (brs, 1 H), 2.22 (ddd, *J* = 14.4, 10.0, 2.8 Hz, 1 H), 2.08 (ddd, *J* = 13.2, 4.4, 2.0 Hz, 1 H), 1.82 (ddd, *J* = 14.4, 8.4, 2.4 Hz, 1 H), 1.71–1.44 (m, 9 H), 0.91 (s, 9 H), 0.90 (s, 9 H), 0.11 (s, 3 H), 0.10 (s, 3 H), 0.09 (s, 3 H), 0.08 (s, 3 H); <sup>13</sup>C NMR (100 MHz, CDCl<sub>3</sub>) δ 98.1, 96.4, 76.2, 75.6, 71.3, 70.8, 70.0, 69.5, 68.0, 67.7, 55.2, 54.9, 39.3, 38.8, 37.2, 35.3, 29.6, 26.4, 26.2, 22.5, 18.4, 18.2, -2.7, -3.0, -3.8, -4.0; HRMS (ESI-TOF) calcd for C<sub>30</sub>H<sub>64</sub>O<sub>10</sub>Si<sub>2</sub>Na [M + Na]<sup>+</sup> 663.3936, found 663.3934.

**Candidate Compound 4h.** To a solution of bis-TBS ether **66** (21.3 mg, 33.2 μmol) in THF (1.0 mL) was added TBAF (1.0 M in THF, 0.17 mL, 0.170 mmol) at room temperature. The mixture was stirred at the same temperature for 15 h. To the mixture was added TBAF (1.0 M in THF, 0.17 mL, 0.170 mmol) at room temperature. The mixture was stirred at the same temperature for 1 h. The mixture was filtered through short column chromatography (CH<sub>2</sub>Cl<sub>2</sub>/MeOH = 7:1). Concentration and column chromatography (EtOAc, EtOAc/MeOH = 5:1) gave candidate compound **4h** (9.7 mg, 71%): colorless oil; *R*<sub>f</sub> = 0.48 (CH<sub>2</sub>Cl<sub>2</sub>/MeOH = 3:1); [α]<sub>D</sub><sup>23</sup> +117 (*c* 0.34, CH<sub>3</sub>OH); IR (neat) 3399, 2938 cm<sup>-1</sup>; <sup>1</sup>H NMR (600 MHz, CD<sub>3</sub>OD) δ 4.72 (d, *J* = 3.0 Hz, 1 H), 4.59 (s, 2 H), 4.11 (dt, *J* = 10.8, 2.4 Hz, 1 H), 3.90–3.87 (m, 1 H), 3.86–3.83 (m, 1 H), 3.79–3.76 (m, 1 H), 3.75–3.71 (m, 1 H), 3.53 (t, *J* = 6.6 Hz, 2 H), 3.34 (s, 3 H), 3.33 (s, 3 H), 3.19 (dd, *J* = 7.8, 2.4 Hz, 1 H), 3.00 (t, *J* = 9.3 Hz, 1 H), 2.21 (ddd, *J* = 13.2, 10.8, 2.4 Hz, 1 H), 2.04 (dd, *J* = 12.6, 5.4 Hz, 1 H), 1.77 (ddd, *J* = 14.4, 10.2, 2.4 Hz, 1 H), 1.66–1.39 (m, 9 H); <sup>13</sup>C NMR (150 MHz, CD<sub>3</sub>OD) δ 99.6, 97.4, 78.5, 77.5, 69.9, 69.6, 69.2, 68.8, 68.1, 55.4, 55.1, 41.8, 39.1, 39.0, 37.5, 30.8, 23.5; HRMS (ESI-TOF) calcd for C<sub>18</sub>H<sub>36</sub>O<sub>10</sub>Na [M + Na]<sup>+</sup>

435.2206, found 435.2205.

**Table S3.** <sup>1</sup>H NMR chemical shifts of natural symbiodinolide (**1**) and the synthetic products **4a–4h**.<sup>[a]</sup>

| Position | <b>1</b> <sup>[b]</sup> | <b>4a</b> <sup>[c]</sup> | <b>4b</b> <sup>[c]</sup> | <b>4c</b> <sup>[c]</sup> | <b>4d</b> <sup>[c]</sup> | <b>4e</b> <sup>[c]</sup> | <b>4f</b> <sup>[c]</sup> | <b>4g</b> <sup>[c]</sup> | <b>4h</b> <sup>[c]</sup> |
|----------|-------------------------|--------------------------|--------------------------|--------------------------|--------------------------|--------------------------|--------------------------|--------------------------|--------------------------|
| 75       | 3.89                    | 3.98                     | 3.98                     | 3.86                     | 3.89                     | 3.89                     | 3.90                     | 4.10                     | 4.11                     |
| 76       | 3.18                    | 3.36                     | 3.31                     | 3.40                     | 3.41                     | 3.22                     | 3.19                     | 3.18                     | 3.19                     |
| 77       | 3.95                    | 3.93                     | 3.97                     | 3.86                     | 3.93                     | 4.06                     | 4.11                     | 3.80                     | 3.88                     |
| 79       | 3.84                    | 3.80                     | 3.82                     | 3.85                     | 3.84                     | 3.78                     | 3.81                     | 3.85                     | 3.84                     |

<sup>[a]</sup> Chemical shifts are reported in ppm with reference to the internal residual solvent (CD<sub>3</sub>OD: 3.30 ppm). <sup>[b]</sup> Data reported in reference 2. Recorded at 800 MHz. <sup>[c]</sup> Recorded at 600 MHz.

**Table S4.** <sup>1</sup>H NMR chemical shifts of natural symbiodinolide (**1**) and the synthetic products **4a–4h**.<sup>[a]</sup>

| Position | <b>1</b> <sup>[b]</sup> | <b>4a</b> <sup>[c]</sup> | <b>4b</b> <sup>[c]</sup> | <b>4c</b> <sup>[c]</sup> | <b>4d</b> <sup>[c]</sup> | <b>4e</b> <sup>[c]</sup> | <b>4f</b> <sup>[c]</sup> | <b>4g</b> <sup>[c]</sup> | <b>4h</b> <sup>[c]</sup> |
|----------|-------------------------|--------------------------|--------------------------|--------------------------|--------------------------|--------------------------|--------------------------|--------------------------|--------------------------|
| 70a      | 1.64                    | 1.62                     | 1.61                     | 1.62                     | 1.63                     | 1.59                     | 1.59                     | 1.59                     | 1.62                     |
| 70b      | 1.72                    | 2.03                     | 2.04                     | 2.04                     | 2.05                     | 2.05                     | 2.05                     | 2.04                     | 2.04                     |
| 71       | 3.80                    | 3.74                     | 3.74                     | 3.75                     | 3.75                     | 3.75                     | 3.77                     | 3.77                     | 3.78                     |
| 72       | 3.04                    | 3.06                     | 3.06                     | 3.07                     | 3.08                     | 3.02                     | 3.02                     | 3.00                     | 3.00                     |
| 73       | 3.69                    | 3.62                     | 3.61                     | 3.72                     | 3.72                     | 3.80                     | 3.75                     | 3.73                     | 3.74                     |

<sup>[a]</sup> Chemical shifts are reported in ppm with reference to the internal residual solvent (CD<sub>3</sub>OD: 3.30 ppm). <sup>[b]</sup> Data reported in reference 2. Recorded at 800 MHz. <sup>[c]</sup> Recorded at 600 MHz.

**Table S5.** Deviations in the <sup>1</sup>H NMR chemical shifts of the synthetic products **4a–4h** ( $\Delta\delta = \delta_1 - \delta_4$ ) relative to those of natural symbiodinolide (**1**).

| Position | <b>4a</b> | <b>4b</b> | <b>4c</b> | <b>4d</b> | <b>4e</b> | <b>4f</b> | <b>4g</b> | <b>4h</b> |
|----------|-----------|-----------|-----------|-----------|-----------|-----------|-----------|-----------|
| 75       | -0.09     | -0.09     | +0.03     | 0         | 0         | -0.01     | -0.21     | -0.22     |
| 76       | -0.18     | -0.13     | -0.22     | -0.23     | -0.04     | -0.01     | 0         | -0.01     |
| 77       | +0.02     | -0.02     | +0.09     | +0.02     | -0.11     | -0.16     | +0.15     | +0.07     |
| 79       | +0.04     | +0.02     | -0.01     | 0         | +0.06     | +0.03     | -0.01     | 0         |

**Table S6.** <sup>13</sup>C NMR chemical shifts of natural symbiodinolide (**1**) and the synthetic products **4a–4h**.<sup>[a]</sup>

| Position | <b>1</b> <sup>[b]</sup> | <b>4a</b> <sup>[c]</sup> | <b>4b</b> <sup>[c]</sup> | <b>4c</b> <sup>[c]</sup> | <b>4d</b> <sup>[c]</sup> | <b>4e</b> <sup>[c]</sup> | <b>4f</b> <sup>[c]</sup> | <b>4g</b> <sup>[c]</sup> | <b>4h</b> <sup>[c]</sup> |
|----------|-------------------------|--------------------------|--------------------------|--------------------------|--------------------------|--------------------------|--------------------------|--------------------------|--------------------------|
| 75       | 69.6                    | 71.9                     | 71.7                     | 73.1                     | 73.2                     | 69.3                     | 69.6                     | 67.8                     | 68.1                     |
| 76       | 78.5                    | 75.9                     | 76.8                     | 78.2                     | 78.5                     | 77.5                     | 78.6                     | 78.4                     | 78.5                     |
| 77       | 70.5                    | 72.9                     | 70.8                     | 73.0                     | 70.6                     | 70.4                     | 68.6                     | 72.3                     | 69.9                     |
| 79       | 70.3                    | 71.0                     | 69.0                     | 71.5                     | 69.1                     | 71.0                     | 69.2                     | 71.8                     | 69.2                     |

<sup>[a]</sup> Chemical shifts are reported in ppm with reference to the internal residual solvent (CD<sub>3</sub>OD: 49.0 ppm). <sup>[b]</sup> Data reported in reference 2. Recorded at 150 MHz. <sup>[c]</sup> Recorded at 150 MHz.

**Table S7.** <sup>13</sup>C NMR chemical shifts of natural symbiodinolide (**1**) and the synthetic products **4a–4h**.<sup>[a]</sup>

| Position | <b>1</b> <sup>[b]</sup> | <b>4a</b> <sup>[c]</sup> | <b>4b</b> <sup>[c]</sup> | <b>4c</b> <sup>[c]</sup> | <b>4d</b> <sup>[c]</sup> | <b>4e</b> <sup>[c]</sup> | <b>4f</b> <sup>[c]</sup> | <b>4g</b> <sup>[c]</sup> | <b>4h</b> <sup>[c]</sup> |
|----------|-------------------------|--------------------------|--------------------------|--------------------------|--------------------------|--------------------------|--------------------------|--------------------------|--------------------------|
| 70       | 42.0                    | 38.9                     | 38.9                     | 38.8                     | 38.8                     | 39.0                     | 39.0                     | 39.0                     | 39.1                     |
| 71       | 70.0                    | 69.6                     | 69.6                     | 69.5                     | 69.6                     | 69.5                     | 69.9                     | 69.9                     | 69.6                     |
| 72       | 77.0                    | 77.5                     | 77.5                     | 77.5                     | 77.5                     | 77.5                     | 77.5                     | 77.5                     | 77.5                     |
| 73       | 71.4                    | 71.1                     | 71.1                     | 72.4                     | 72.4                     | 69.9                     | 69.5                     | 69.6                     | 69.6                     |

<sup>[a]</sup> Chemical shifts are reported in ppm with reference to the internal residual solvent (CD<sub>3</sub>OD: 49.0 ppm). <sup>[b]</sup> Data reported in reference 2. Recorded at 150 MHz. <sup>[c]</sup> Recorded at 150 MHz.

**Table S8.** Deviations in the <sup>13</sup>C NMR chemical shifts of the synthetic products **4a–4h** ( $\Delta\delta = \delta_1 - \delta_4$ ) relative to those of natural symbiodinolide (**1**).

| Position | <b>4a</b> | <b>4b</b> | <b>4c</b> | <b>4d</b> | <b>4e</b> | <b>4f</b> | <b>4g</b> | <b>4h</b> |
|----------|-----------|-----------|-----------|-----------|-----------|-----------|-----------|-----------|
| 75       | -2.3      | -2.1      | -3.5      | -3.6      | +0.3      | 0         | +1.8      | +1.5      |
| 76       | +2.6      | +1.7      | +0.3      | 0         | +1.0      | -0.1      | +0.1      | 0         |
| 77       | -2.4      | -0.3      | -2.5      | -0.1      | +0.1      | +1.9      | -1.8      | +0.6      |
| 79       | -0.7      | +1.3      | -1.2      | +1.2      | -0.7      | +1.1      | -1.5      | +1.1      |

## References

- (1) I. Ohtani, T. Kusumi, Y. Kashman and H. Kakisawa, High-field FT NMR application of Mosher's method. The absolute configurations of marine terpenoids, *J. Am. Chem. Soc.*, 1991, 113, 4092–4096.
- (2) M. Kita, N. Ohishi, K. Konishi, M. Kondo, T. Koyama, M. Kitamura, K. Yamada and D. Uemura, Symbiodinolide, a novel polyol macrolide that activates N-type Ca<sup>2+</sup> channel, from the symbiotic marine dinoflagellate *Symbiodinium* sp., *Tetrahedron*, 2007, 63, 6241–6251.

C:\Users\Trikamura\Documents\1\Sg-1\202A\SHD\_C61-CR3\_fragment\MNR\val\cse\OH-345-als

```

DFILE OH-345.als
COMMT
DATE_ Sun Jan 07 15:33:26 2018
EXNO 1
PROCNO 1
EXMD NON
SOLVENT
PULSE
PROG zgpg30
AQ 3.9965 MEZ
RG 10500.00 HZ
FIDRES 0.32768
POINT 7993.68 HZ
SFO 500.136198 MHz
ACQTM 4.08993 sec
PD 2.9010 usec
PL 0.00
IRNUC 1H
IRNUC2
CTEMP 24.3 c
CDCL3
EXPNO 7.26 FPM
SFB 0.12 HZ
RGAIN 1.14
  
```

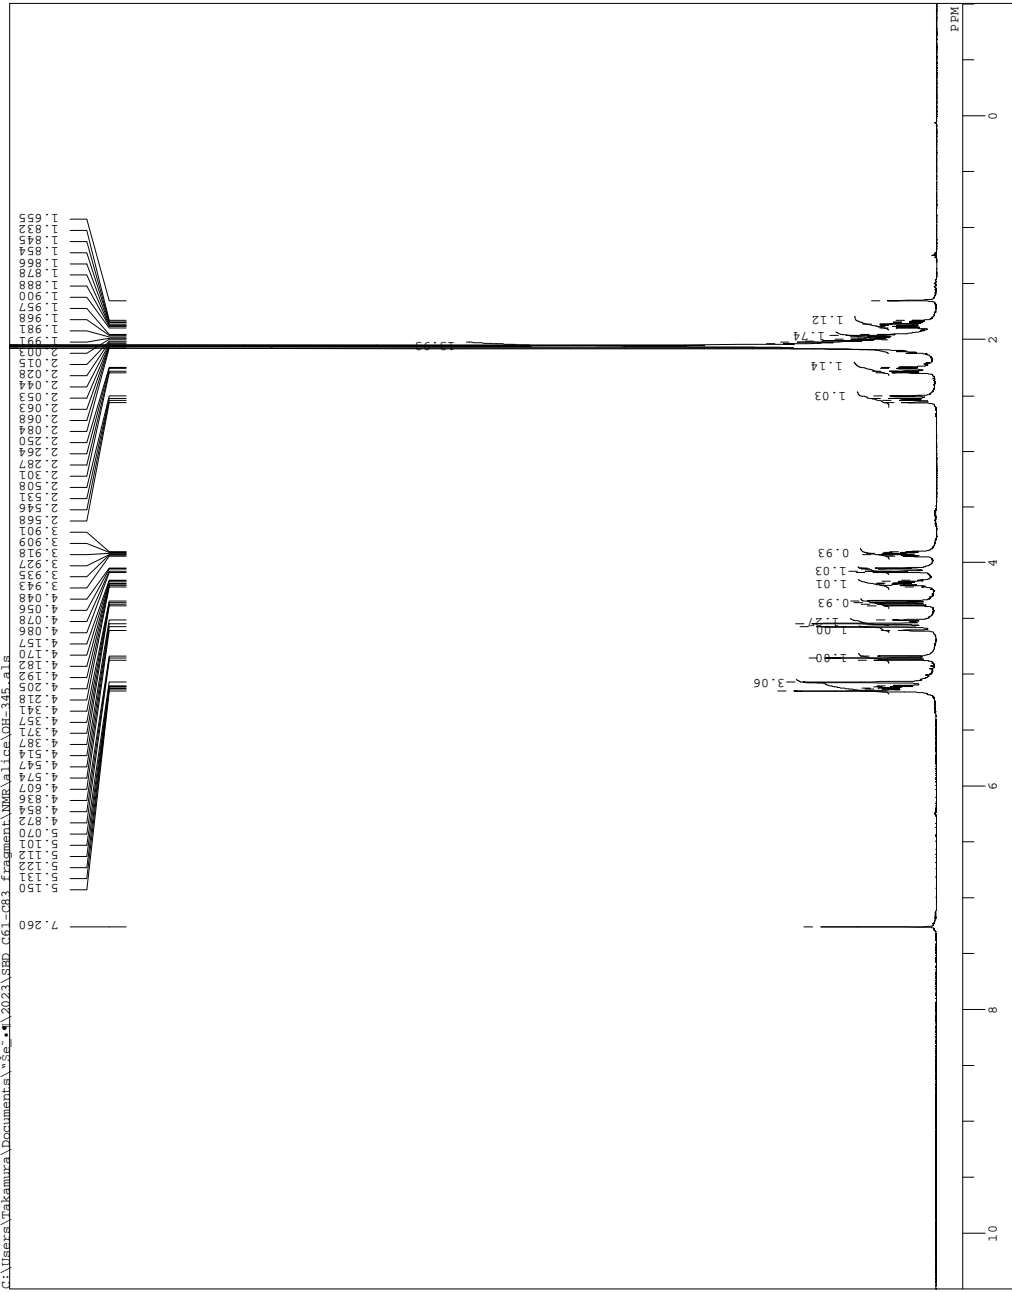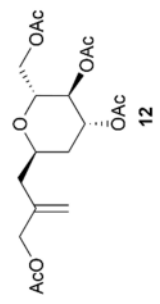

DFILR OH-345 13C.a1s  
 CONNT 81  
 ORMC 31 Jan 07 17:48:01 2018  
 EXMOD BCM  
 OBSFO 100.40 MHz  
 OBSFQ 10500.00 Hz  
 OBFIN 32768 Hz  
 POINT 2717536 Hz  
 SCANS 1  
 ACQTM 1.2059 sec  
 PD 1.7940 sec  
 P1 6.80 usec  
 IRNUC 1H  
 CTEMP 28.1 c  
 EXREF CDCL3 77.00 PPM  
 BF 2.00 Hz  
 RGAIN 25

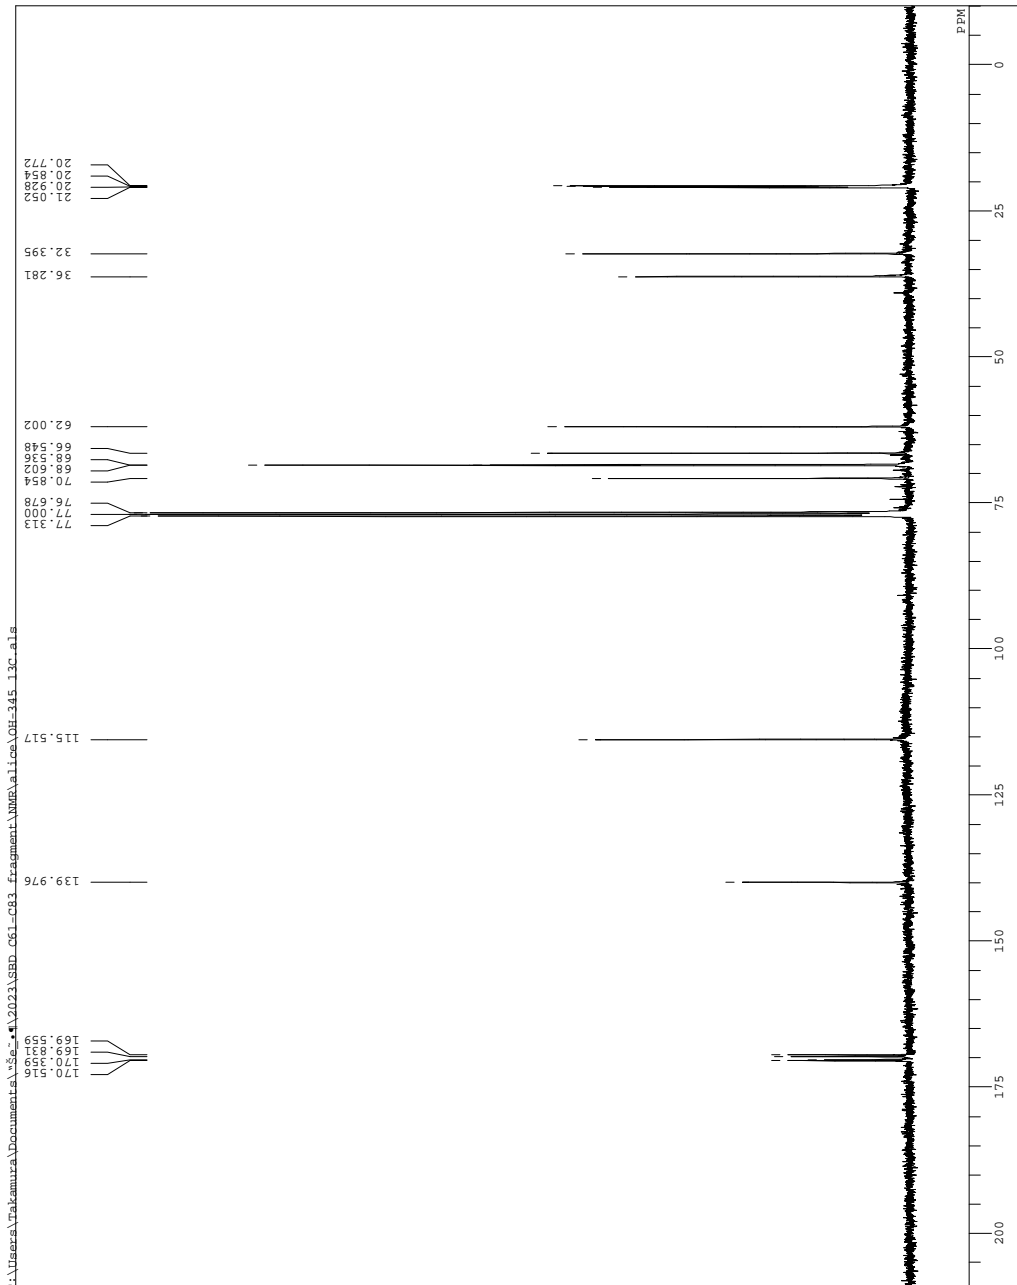

C:\Users\takamura\Documents\5e\2021\SD\_C61\_CB3\_fragment\NMR\alice\OH-347\_als

OH-347.als  
COMPT 01  
DATE\_ Tue Jan 09 20:09:22 2018  
EXMOD NON  
OBPRO 399.65 MHz  
OBSEF 1024.00 Hz  
POINT 32768 Hz  
FREQU 7993.60 Hz  
ACQTM 4.0993 sec  
PD 2.3010 usec  
IRNUC 1H 24.7 c  
CTEMP CDCL3 7.26 ppm  
SOLVF CDCL3  
REF 0.12 Hz  
RGAIN 1.14

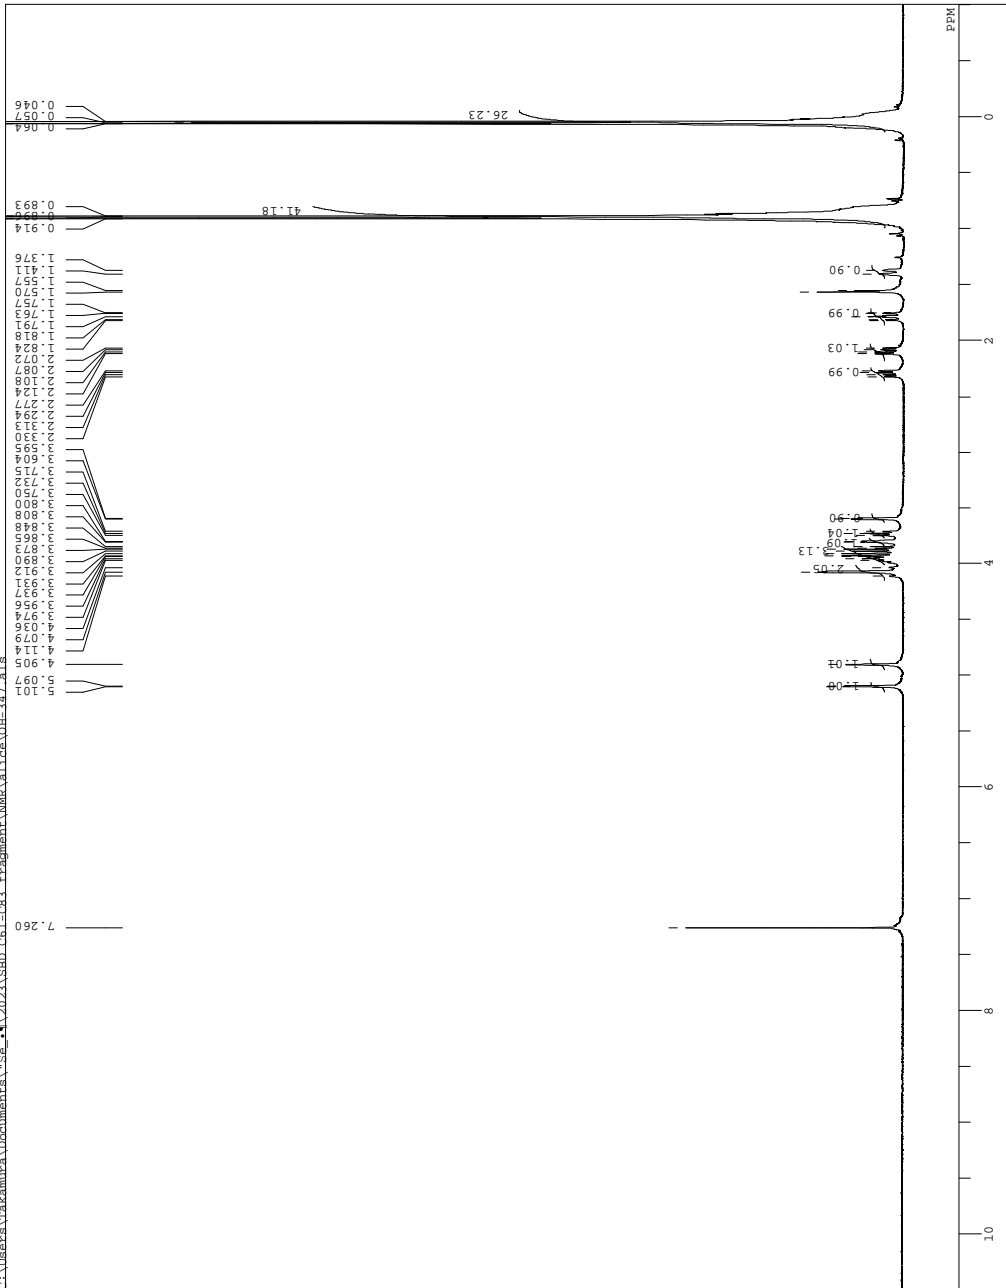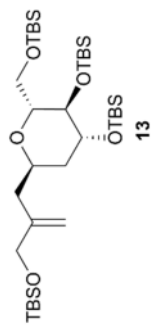



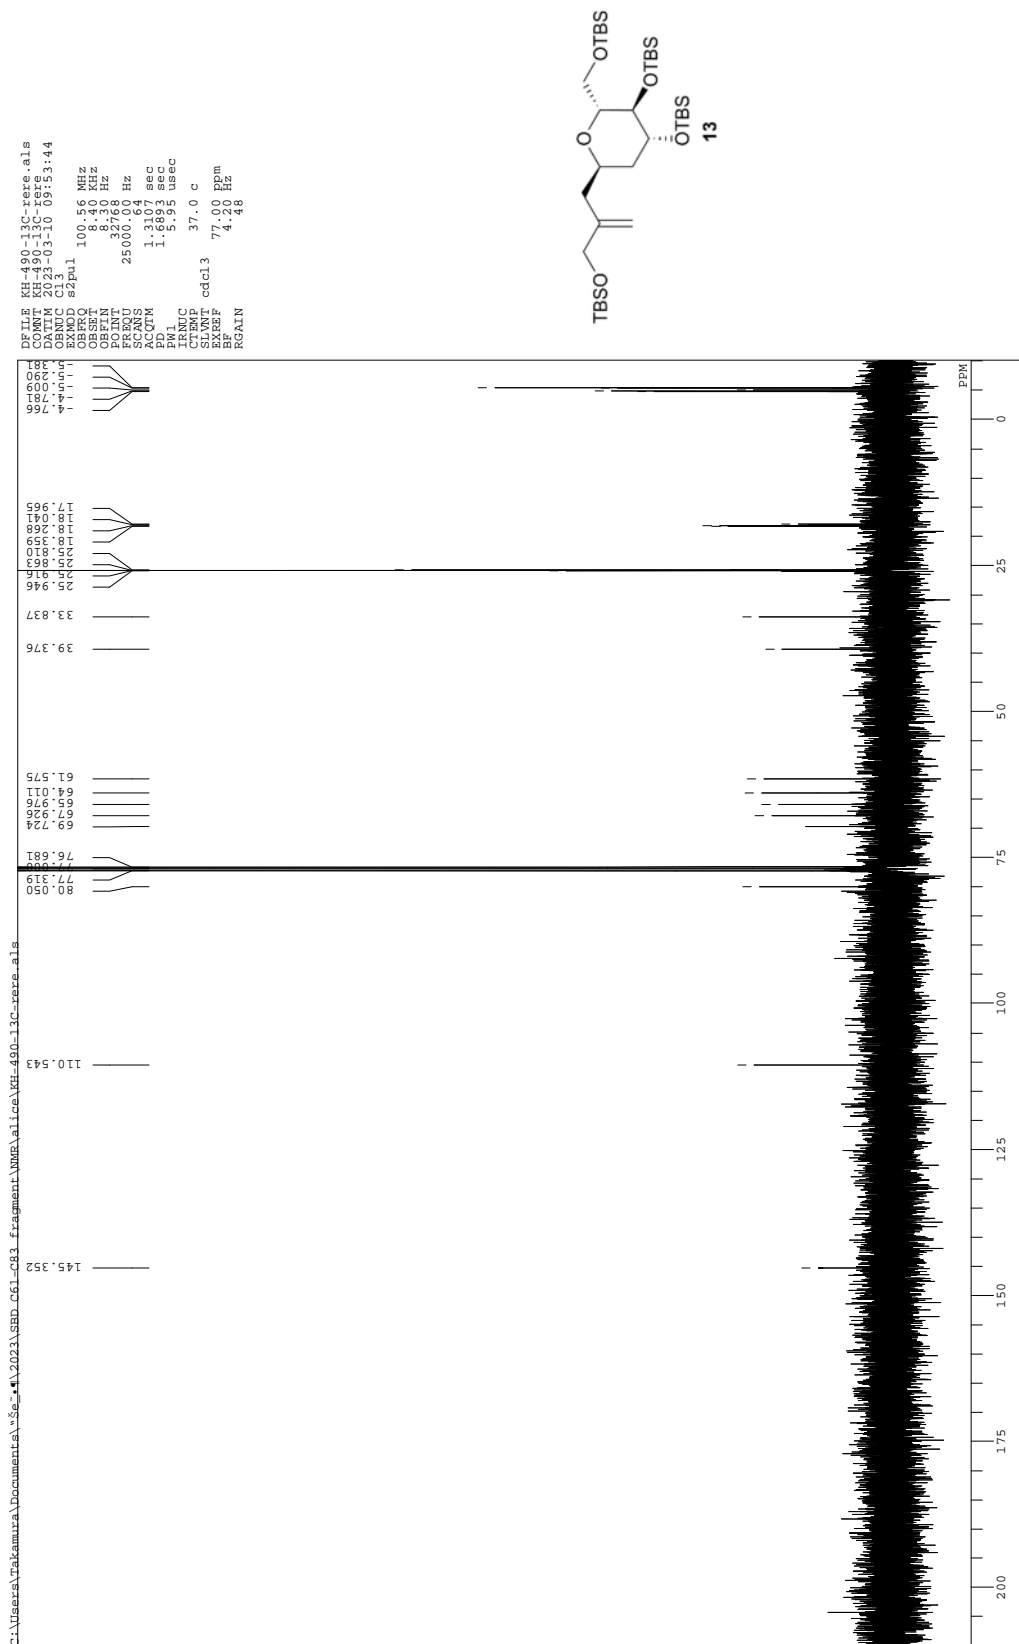

C:\Users\takamura\Documents\Se\_m\2023\SBD\_C61-C83\_fragment\NMR\alice\OH-348\_als  
 FILE OH-348\_als  
 DATE Mon Jan 10 17:43:33 2018  
 F2  
 OBSERVATION MON  
 OBSSET 399.65 MHz  
 OBSNUC 1H  
 OBSFREQ 124.00 KHz  
 OBSGAIN 1000000 Hz  
 OBSWID 30000 Hz  
 FREQ0 7993.60 Hz  
 SCANS 4.0988  
 PD 2.9010 sec  
 PD0 6.40 usec  
 PULPROG zgpg30  
 FWHM 24.6 c  
 CTDW 0  
 SLOPE 1  
 SLVNT CDCL3  
 EXREF 7.26 ppm  
 RGAIN 0.115

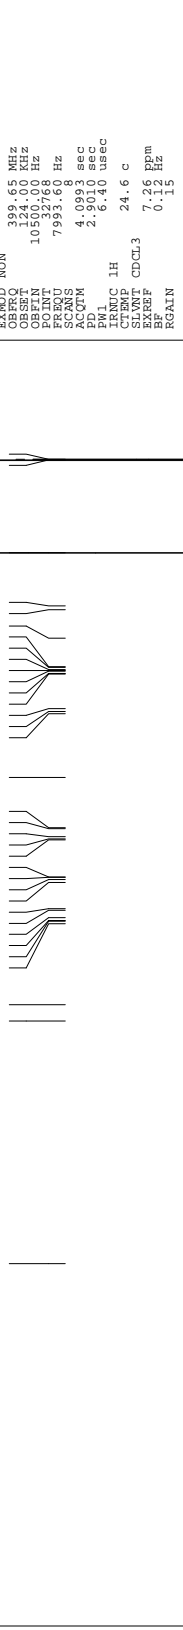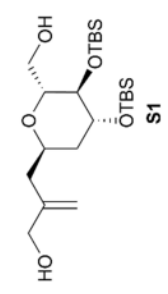

C:\User\Takahara\Documents\1\_Sg\_1\2021\SED\_G61-G83\_Fragment\NMR\alica\OH-348\_13C\_als

DFILE OH-348\_13C\_als  
Date\_ Time Wed Jan 10 18:26:55 2018  
DIR C:\User\Takahara\Documents\1\_Sg\_1\2021\SED\_G61-G83\_Fragment\NMR\alica\OH-348\_13C\_als  
EXMOD BCM  
EXPT 1  
P1 1.20000000 sec  
P2 1.68000000 sec  
PWL  
IRNUC 1H  
IRNUC 13  
SOLNT CDCL3  
SOLNT CDCL3  
EXREF  
EXREF 77.00 PPM  
RGAIN 2.00 Hz

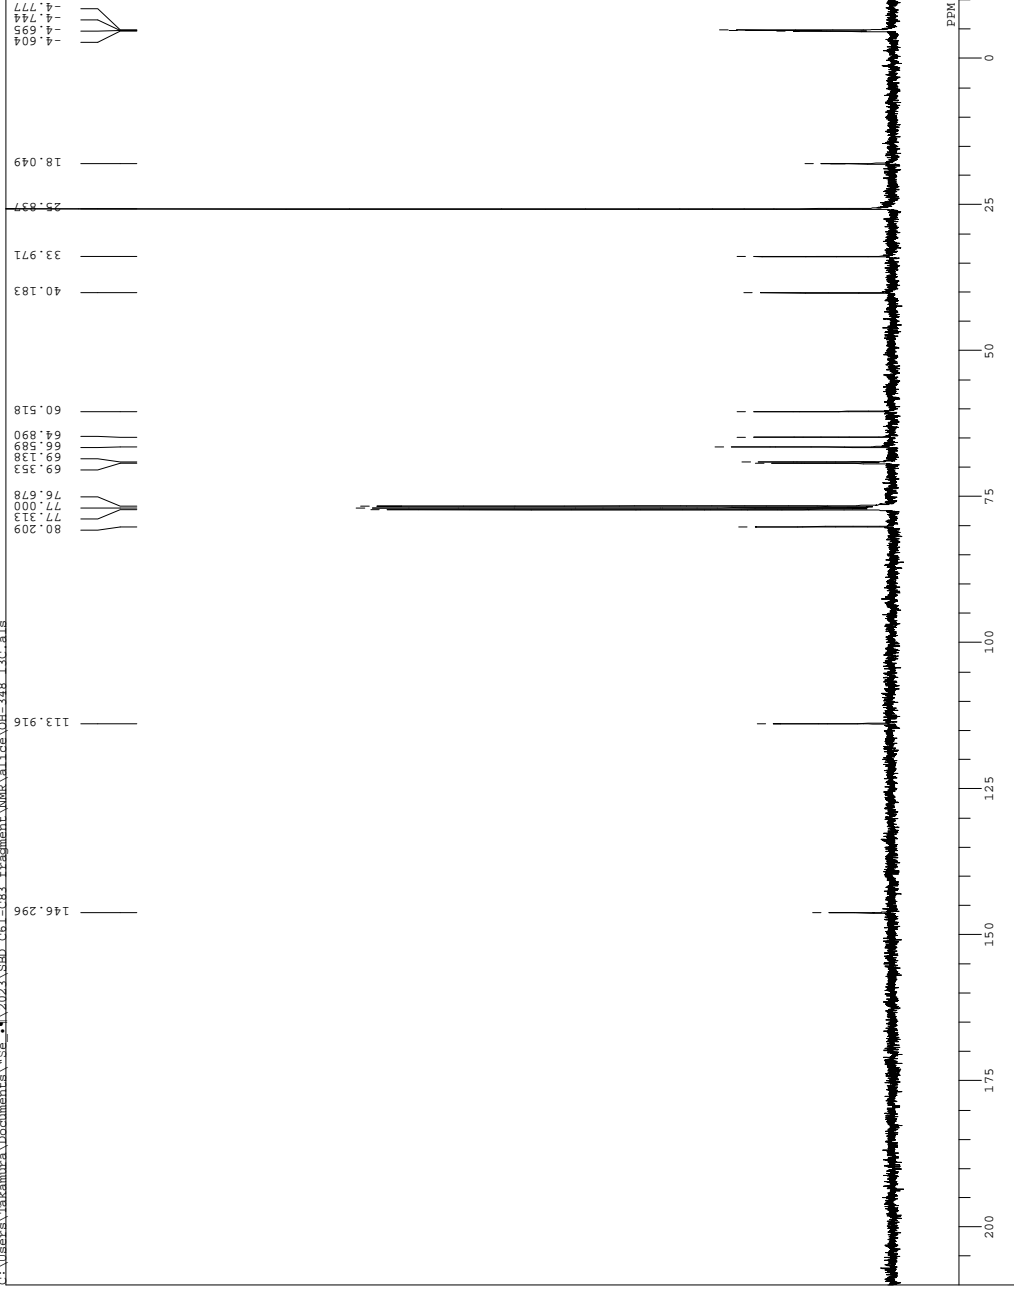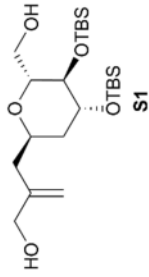

```

DFILE OH-349.als
COMNT Thu Jan 11 20:02:21 2018
DATE_
TIME_
EXMOD NON
PROB_
PULPROG zgpg30
DPRG_
AQ 399.65 MHz
NUC1 13C
NUC2 13C
OBLEN 10560.00 Hz
SFO 125.760 MHz
RG 7993.60 Hz
AQ 4.0993 sec
PD 2.5010 sec
PC 6.40 usec
IRNUC 1H
IRPROG zgpg30
CTEMP 24.5 C
CDCL3
EXREF 7.26 ppm
RGAIN 2.00 Hz
SF 125.760 MHz
RGAIN 1.3

```

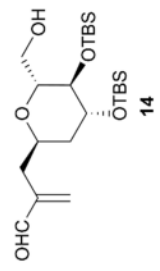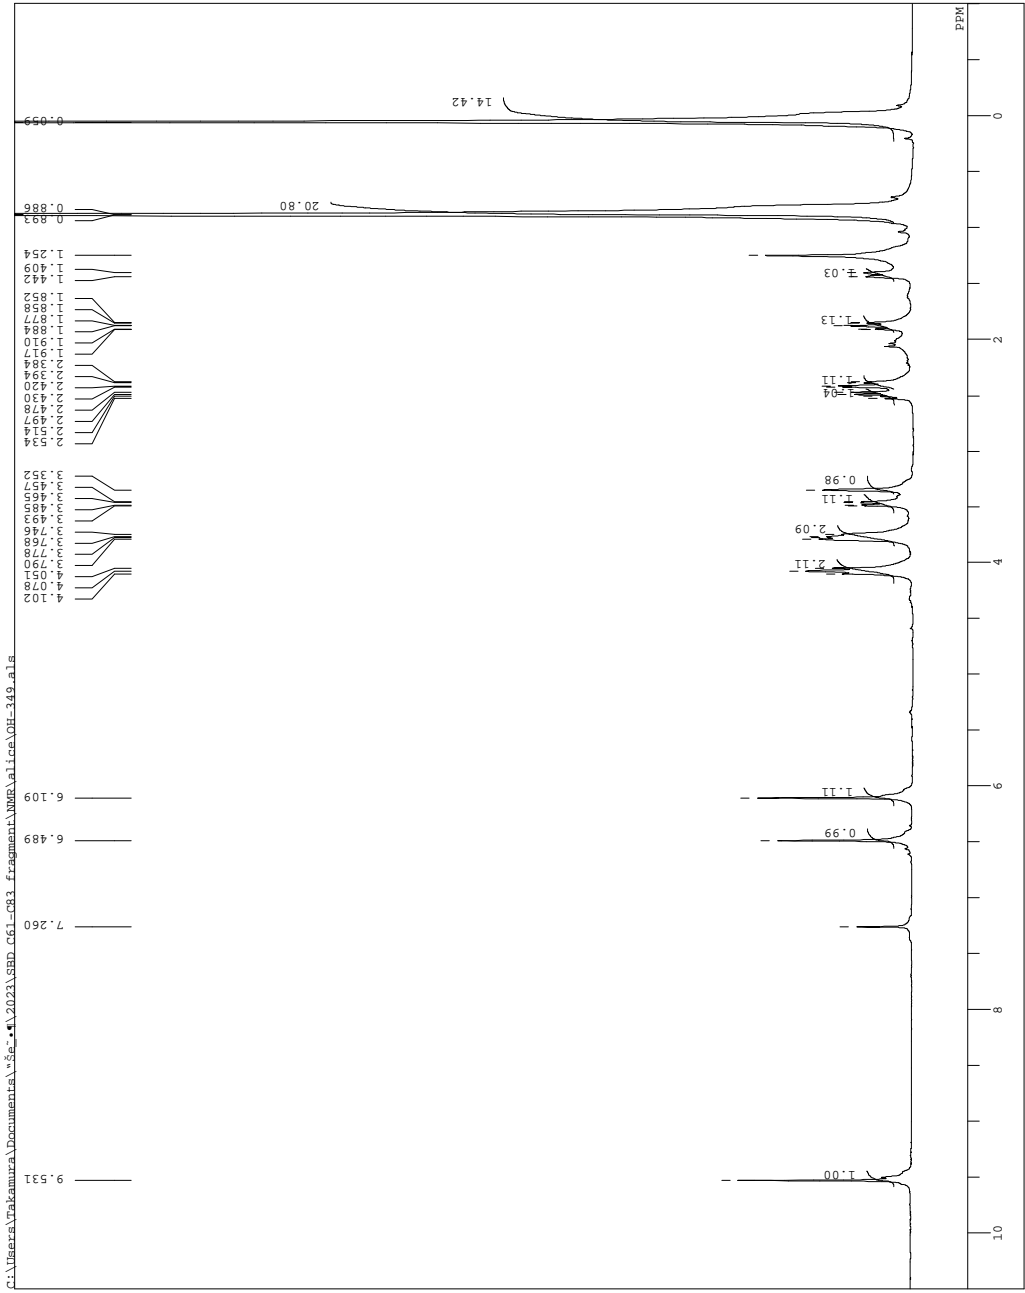

C:\Users\takamura\Documents\Se...2023\SRD\_661\_c83\_fragment\NMR\alice\OH-349\_13C\_als  
 FILE OH-349\_13C\_als  
 DATE Thu Jan 11 20:41:14 2018  
 INSTR 13C  
 ORBIT 13C  
 OBSO BCM  
 OBSF 100.40 MHz  
 OBSF 125.00 KHz  
 DRPT 105300.68 Hz  
 PRGT 27173.90 Hz  
 FREQD 27173.90 Hz  
 SCANS 1.656  
 PD 1.7940 sec  
 PDI 1.7940 sec  
 PULP 1H  
 PRGM 27.7 c  
 SFOV 100.40 MHz  
 SOLVT CDCl3  
 SIWV 77.00 PPM  
 EXPR 2.24  
 RGAIN 2.24

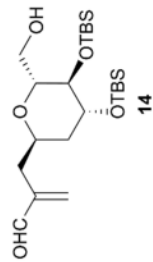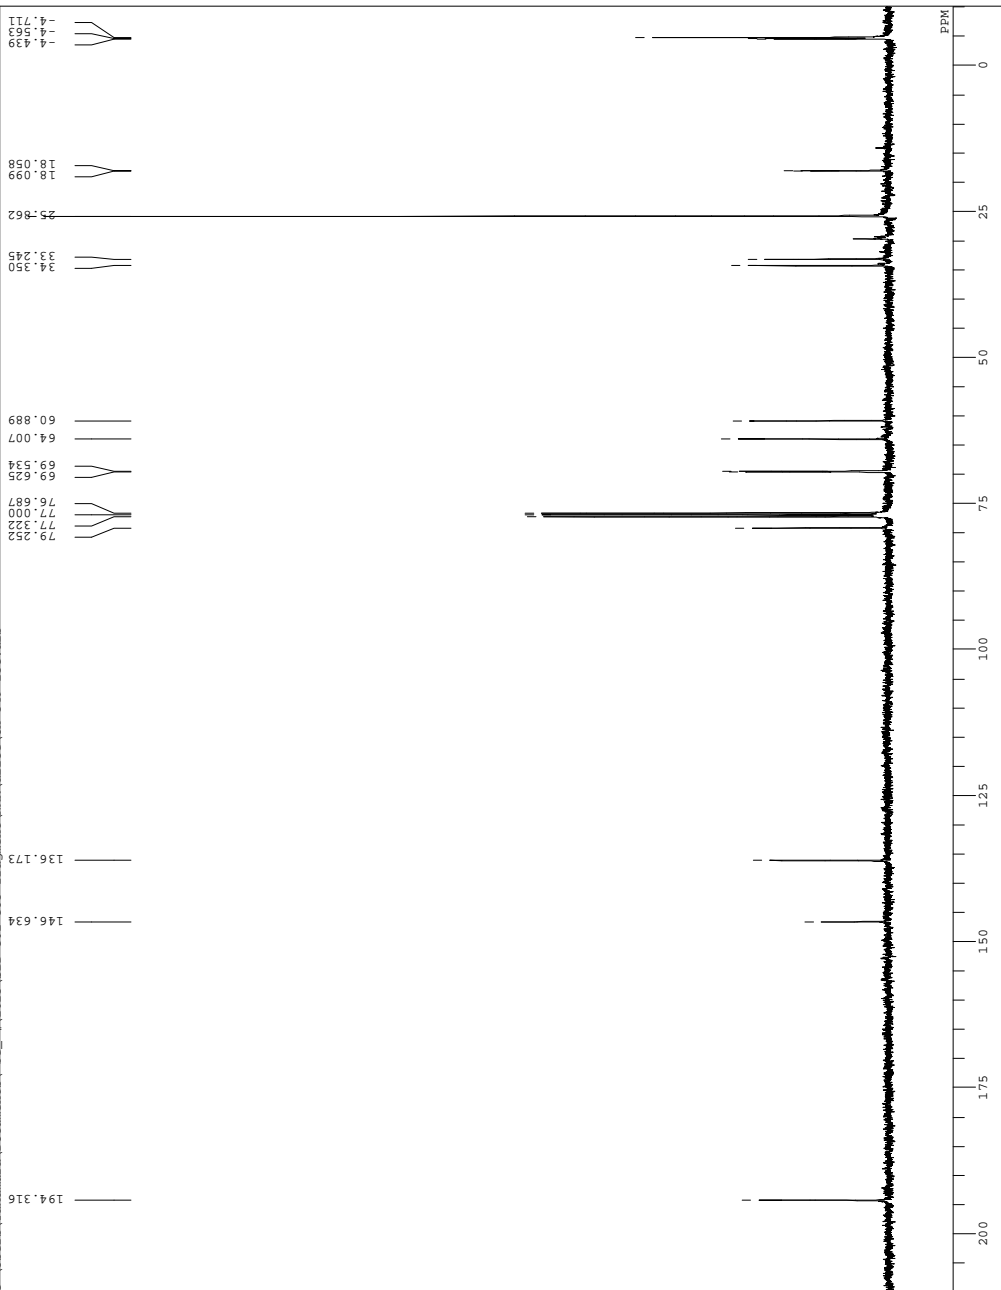

C:\Users\Takatamawa\Documents\5e\_4\2023\SRD\_061\_083\_Fragment\NMR\alic\OH-279-2-5\_CDCl3\_als

OH-279-2-5 CDCl3\_als  
COM1 Mon Jan 15 18:42:05 2018  
DATE  
NAME  
EXPNO 1  
PROCNO 1  
PROCPS 1  
SFO 399.65 MHz  
OBSFQ 399.65 MHz  
OBSST 74.00 Hz  
PULPROG zgpg30  
PROBHD 5mm QNP 1H/13  
PULPROG zgpg30  
FREQ0 79933.60 Hz  
ACQ001 4.0993 sec  
PD 2.9010 sec  
INSTRUM 1H  
TEMP 24.2 c  
SOLVENT CDCl3  
RF 7.26 MHz  
RGAIN 0.12 Hz  
RGAIN 1.12

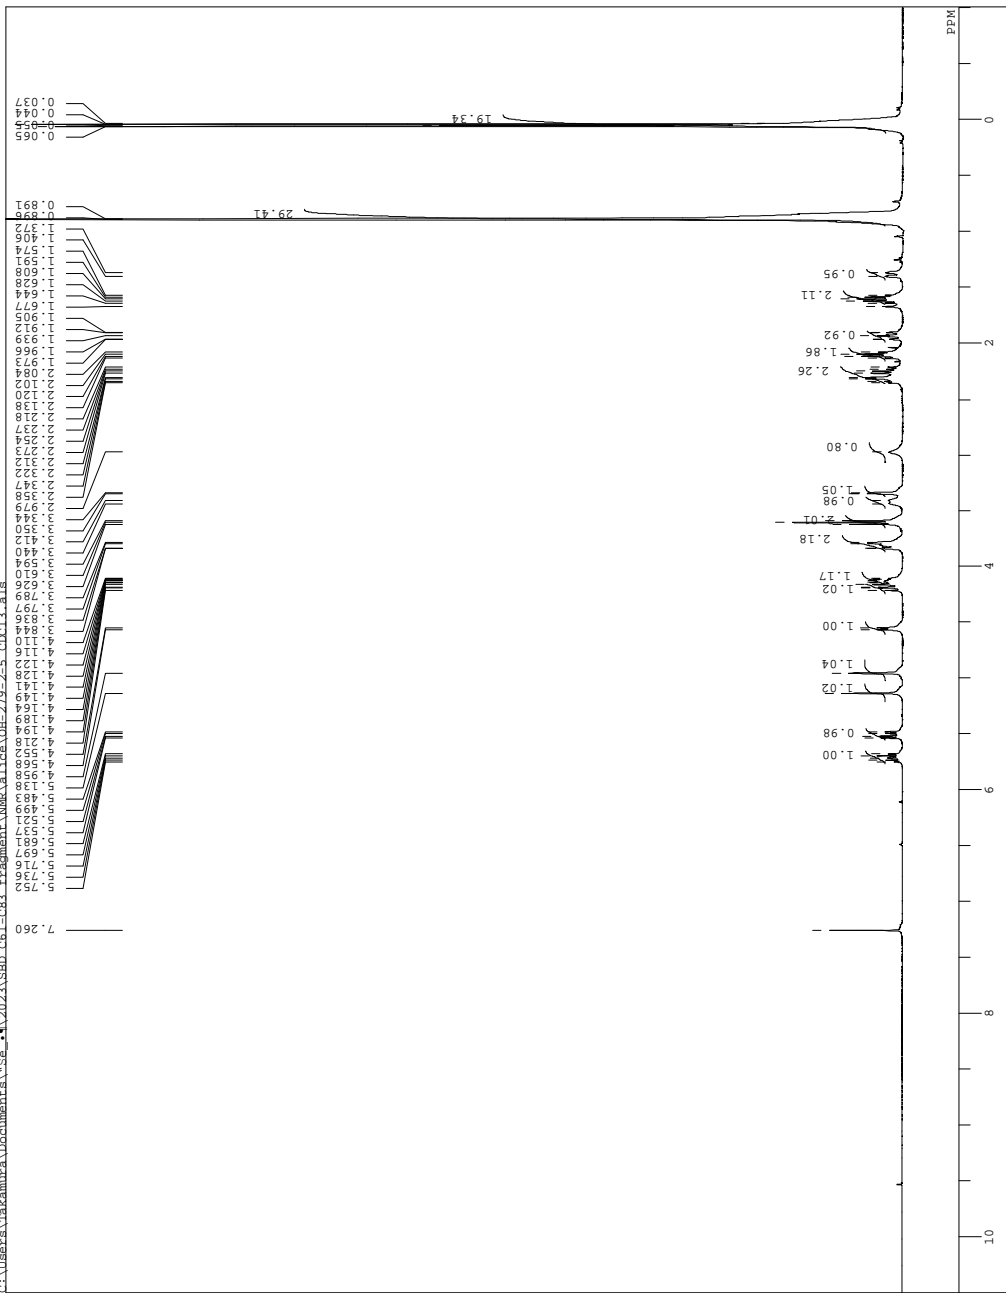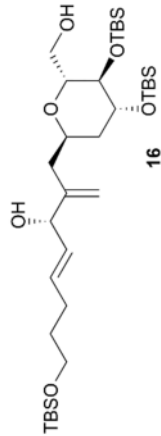

C:\Users\takamura\Documents\data\2021\SED\_C61-CB3\_fragment\NMR\alices\OH-279-2-5-13C.alc

DFILE OH-279-2-5-13C.alc  
CONT  
DATE Mon Jan 15 19:07:22 2018  
NAME  
PROB BBO  
PULPROG zgpg30  
SFO 100.625 MHz  
AQ 1.00000000 sec  
RG 32768  
FIDRES 0.32768 Hz  
AQRES 27173.90 Hz  
FREQ 27173.90 Hz  
SOLVENT CDCL3  
AQC 1.2059 sec  
PC 1.7940 sec  
PD 6.80 usec  
PRNUC 1H  
PRNUC2  
PRNUC3  
P1 27.50 usec  
PT 27.50 usec  
SOLVENT CDCL3  
SLVNT CDCL3  
NUC1 13C  
RF 2.00 MHz  
RGAIN 2.25

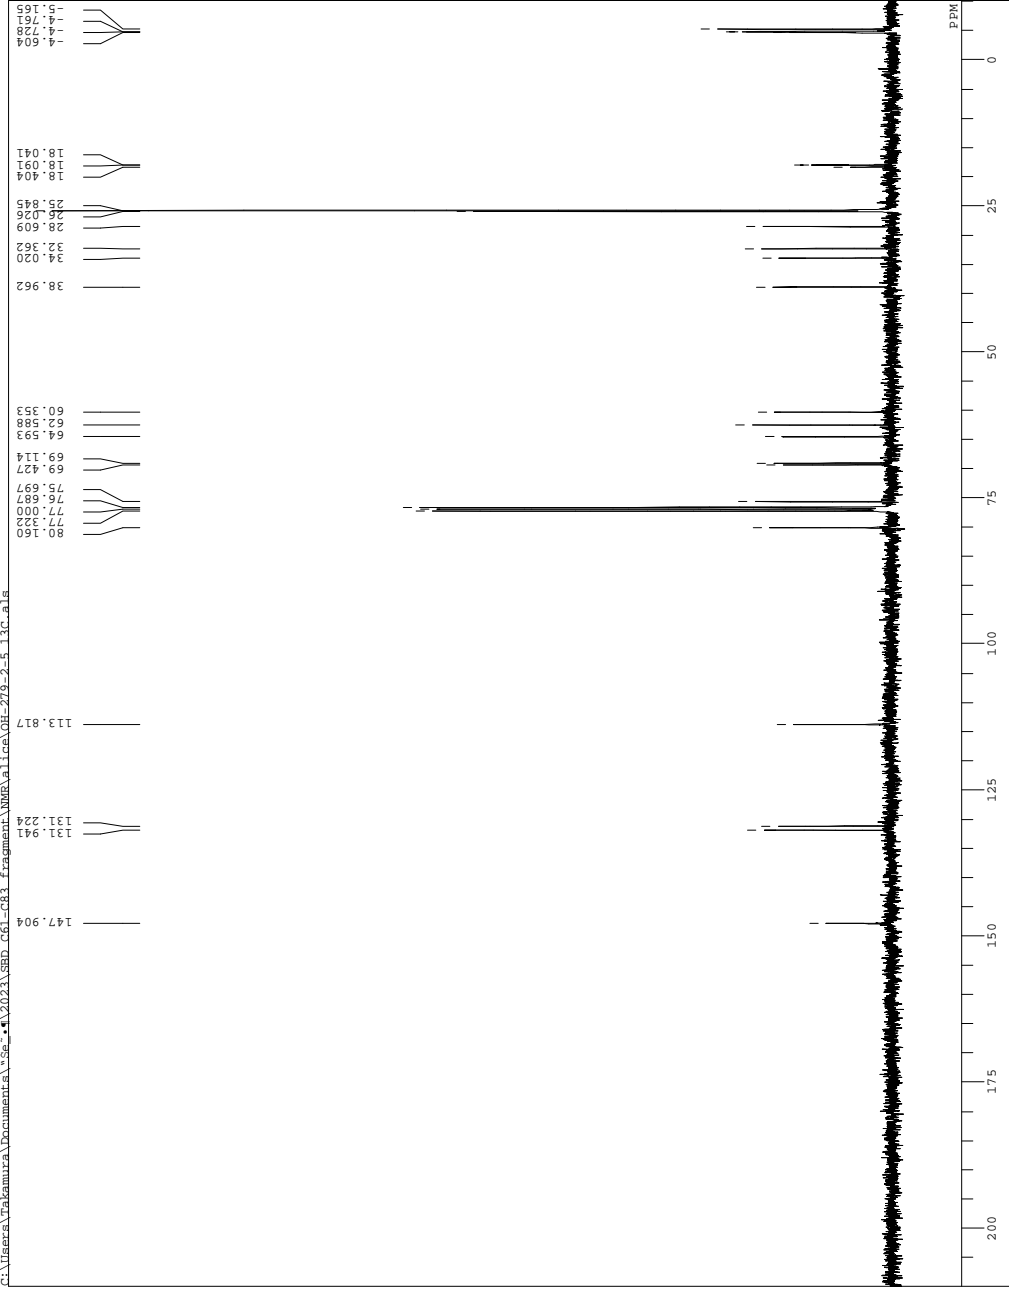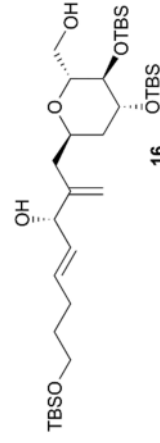

D:\Users\Yrakamura\Documents\Se\_4\2023\SRD\_cg1-cr3\_fragments\NMR\1ca\OH-279-2-2\_CDCl3.als  
Date\_ The Jan 16 11:52:11 2018  
COMM OH-279-2-2\_CDCl3.als  
ORBIT 1H  
EXMOD NON  
PULPROG zgpg30  
399.65 MHz  
ORBSF 134.00 KHz  
105004.00 Hz  
PC 20.00  
FREQ0 79373.60 Hz  
SCANS 8  
ACQTM 4.0973 sec  
RG 2.640 usec  
PULP1  
IRMTC 1H 24.3 c  
SI 1000  
SOLVENT CDCl3  
INSTRUM spect  
EXREF 7.26 PPM  
RGAIN 0.12 Hz

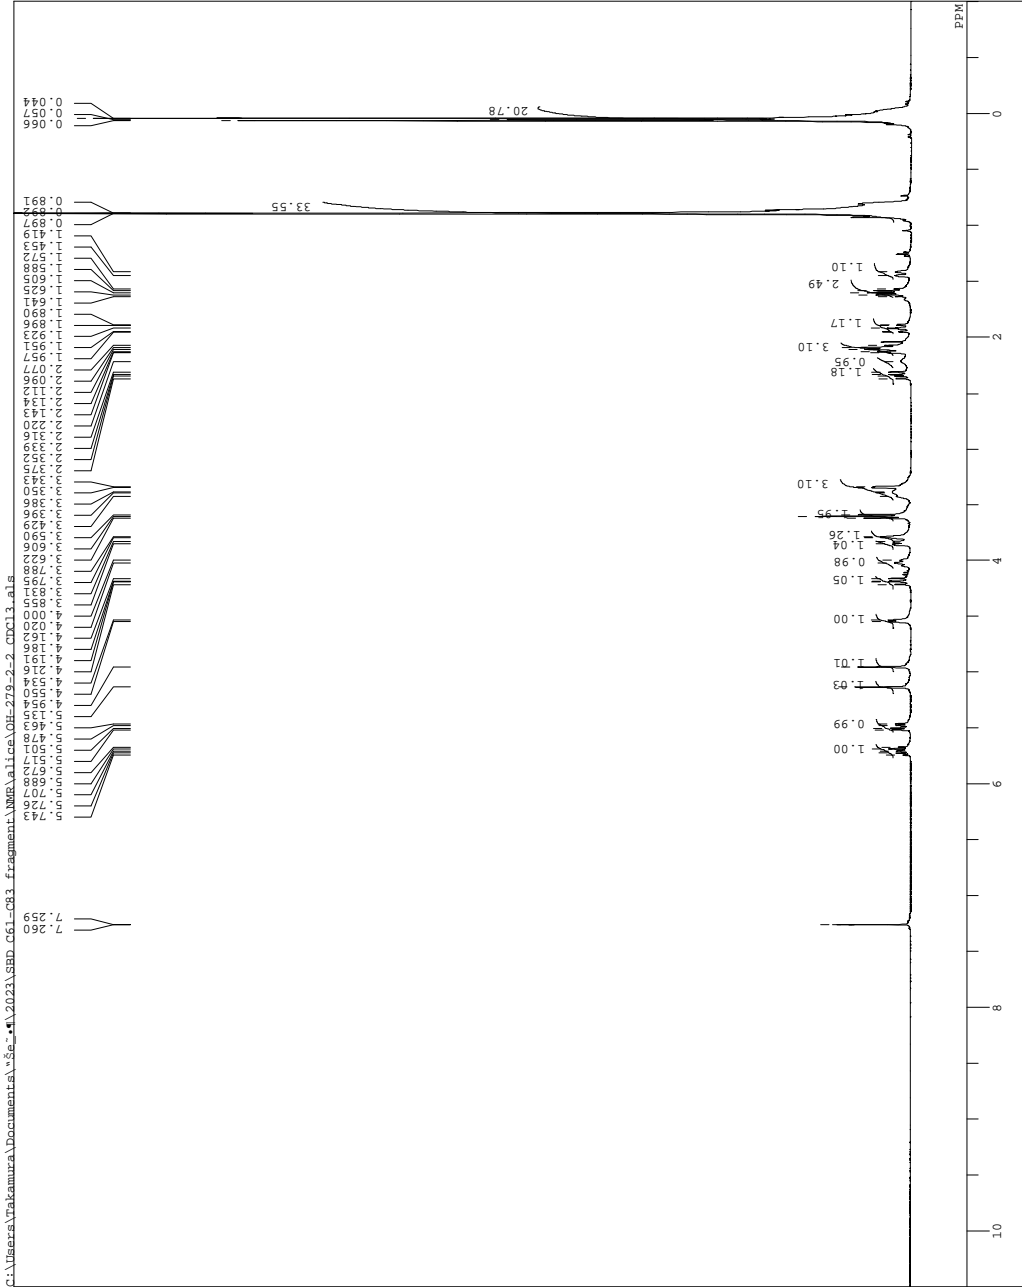



C:\Users\takamura\Documents\3se\*\20231\SED\_C61-C83\_fragment\NMR\13c\OH-279-2-2\_13c\_als

DFILE OH-279-2-2\_13c\_als  
COMPT Tue Jan 16 12:17:53 2018  
DALIM 1  
EXNO C  
EXMOC BCO  
OBFREQ 100.40 MHz  
OBSF1 100.40 MHz  
OBSF2 100.40 MHz  
POINT 32768  
FREQU 27173.90 Hz  
ACQTM 1.2059 sec  
PD 1.7940 sec  
PRNUC 1H 6.80 usec  
PRNUC 13C 27.2 c  
SOLVT CDCL3 77.00 ppm  
REF BF 2.00 Hz  
RGAIN

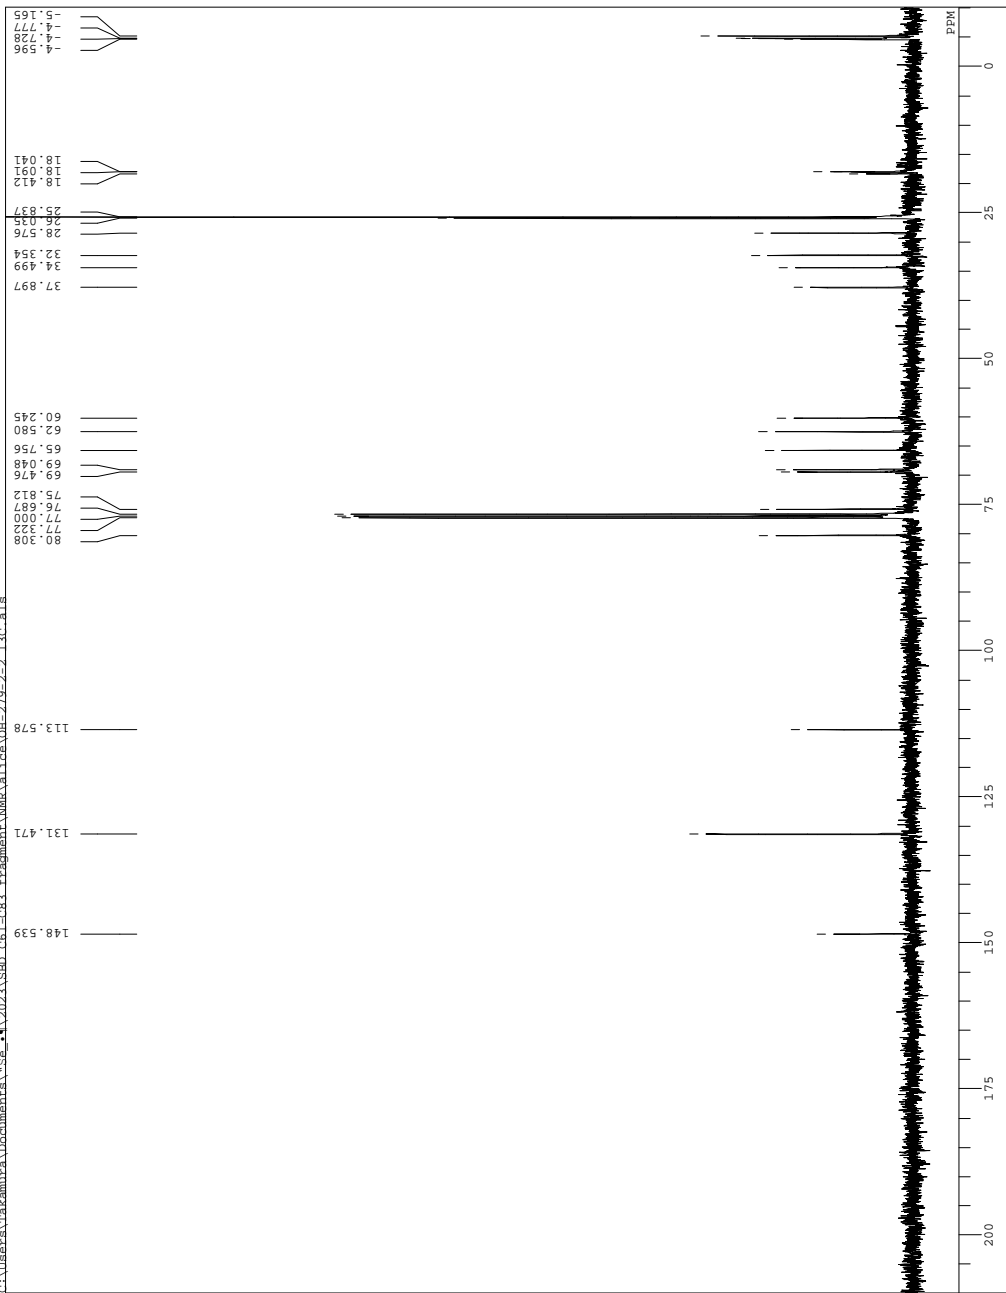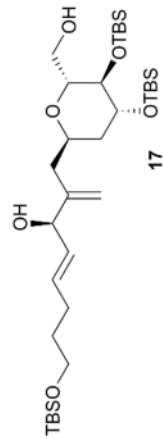

C:\Users\Takamura\Documents\Se-4\2023\SRD\_061-CR3\_Fragment\NMR\data\OH-351\_als

```

PR1 F OH-351_als
COMT Wed Jan 17 20:49:32 2018
C13 100
DMSO d6
PULP 1H
OBFFO NON
399.65 MHz
124.00 KHz
10532768 Hz
7993.60 Hz
FREQU
SCANS 4.0893 sec
PD 2.9010 sec
6.40 usec
PULP 1H 24.4 C
SOLVT CDCl3
SIMP 7.26 PPM
RGAIN 0.12 PPM
0.17
  
```

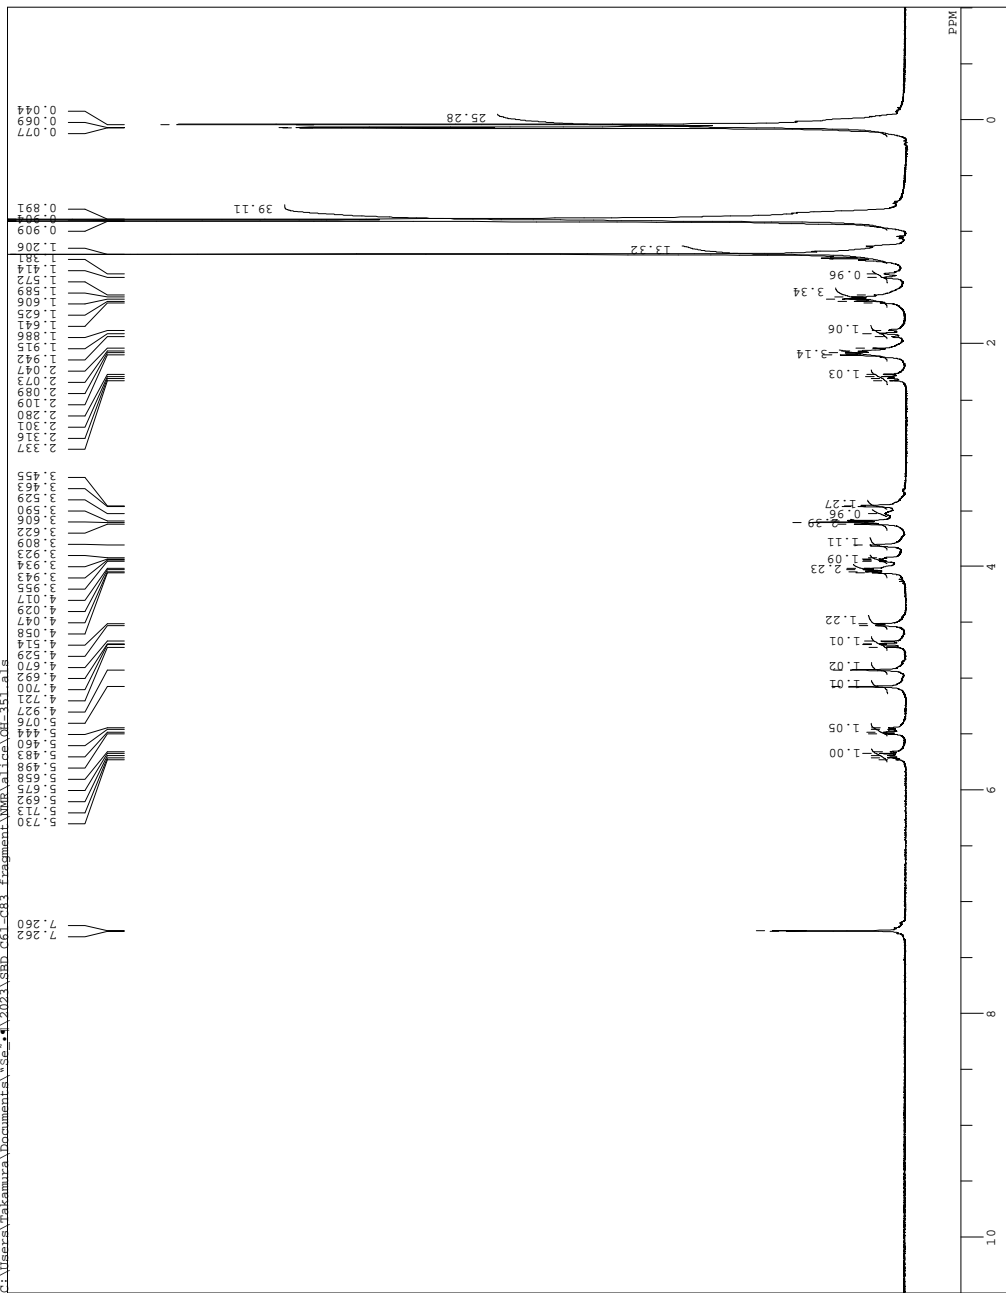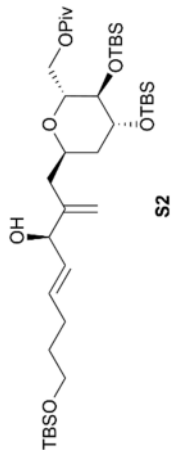

C:\Users\Takamura\Documents\5c-1\2023\SEB\_C61-C81\_Fragment\NMR\val\ca\OH-351\_13c.a1s

DFILF OH-351\_13c.a1s  
 COMPT wed Jan 17 21:59:11 2018  
 DATEM  
 EXMOD B04  
 EXMOD B04  
 OFREQ 100.40 MHz  
 OFREQ 100.40 MHz  
 OFSFT 10540.00 Hz  
 POINT 32768 Hz  
 FREQ0 2717390 Hz  
 FREQ1  
 ACQTM 1.2059 sec  
 PD 1.7940 sec  
 INNUC 1H  
 CTMP CDCl3 28.1 c  
 EXPT 77.00 ppm  
 BF 2.00 Hz  
 RGAIN 25

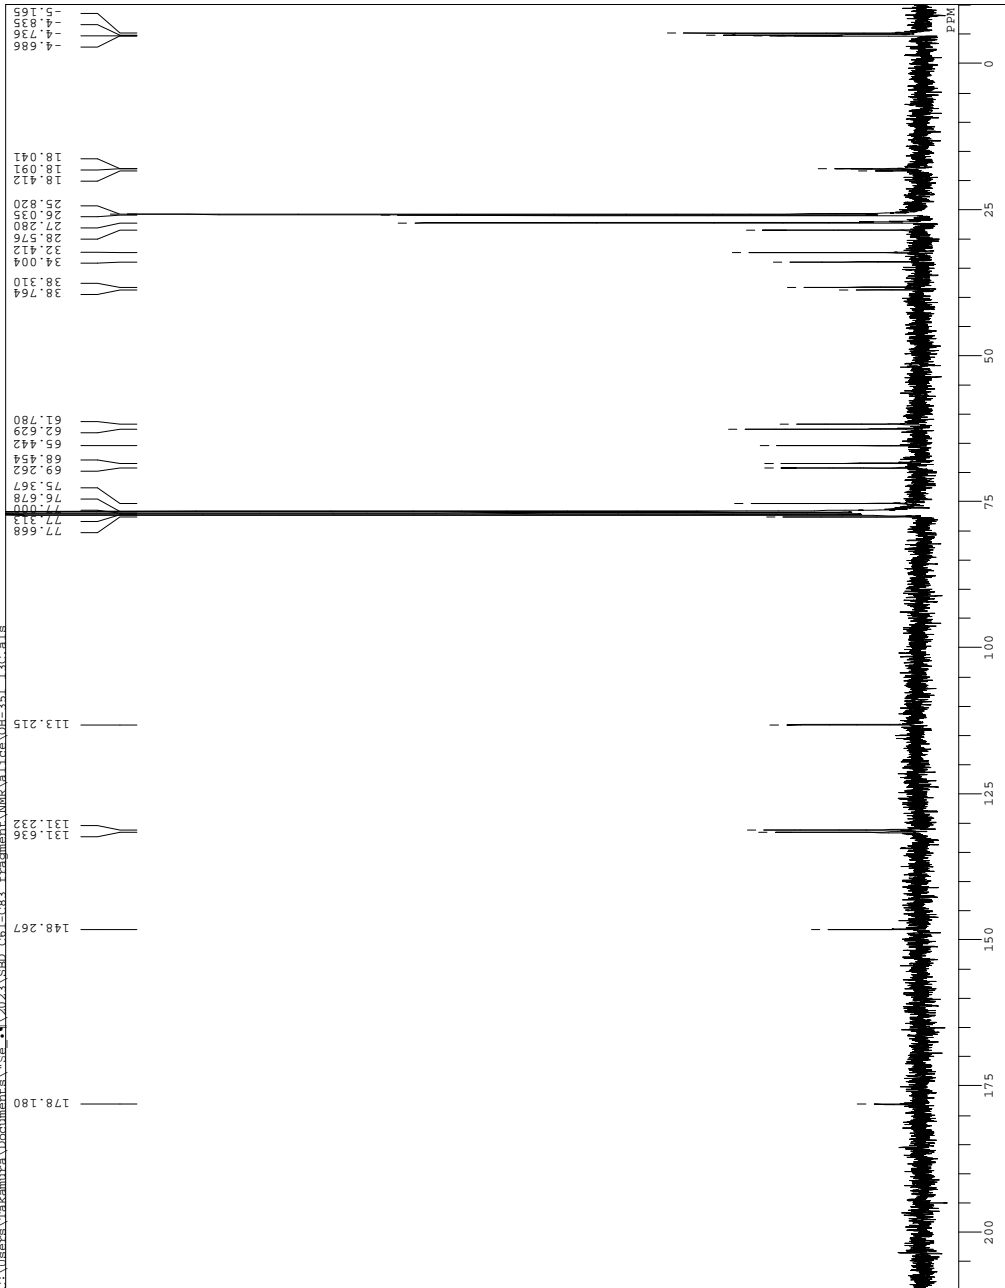

```

FILE      OH-355.als
NAME      OH-355
DATE      Tue Jan 23 19:49:46 2018
INSTRUM   spect
PROBHD    5mm
PULPROG   zgpg30
AQ        3.99650000
SFO       399.65 MHz
NUC1      13C
NUC2      13C
OBFTN     124.00 KHz
OBPRG     10590.00 Hz
FREQ      79337.60 Hz
SCANS     4.00000000
SCANS2    2.90100000
SCANS3    6.40000000
PD        2.00000000
PD2       2.00000000
PD3       2.00000000
RG1       24.7 C
RG2       24.7 C
RG3       24.7 C
IRFNC     1.00000000
SOLVENT   CDCL3
EXREF     7.26 PPM
RGAIN     0.11700000

```

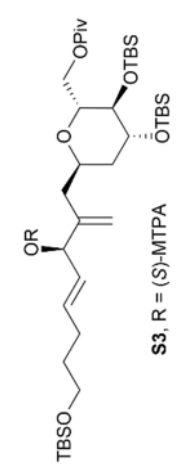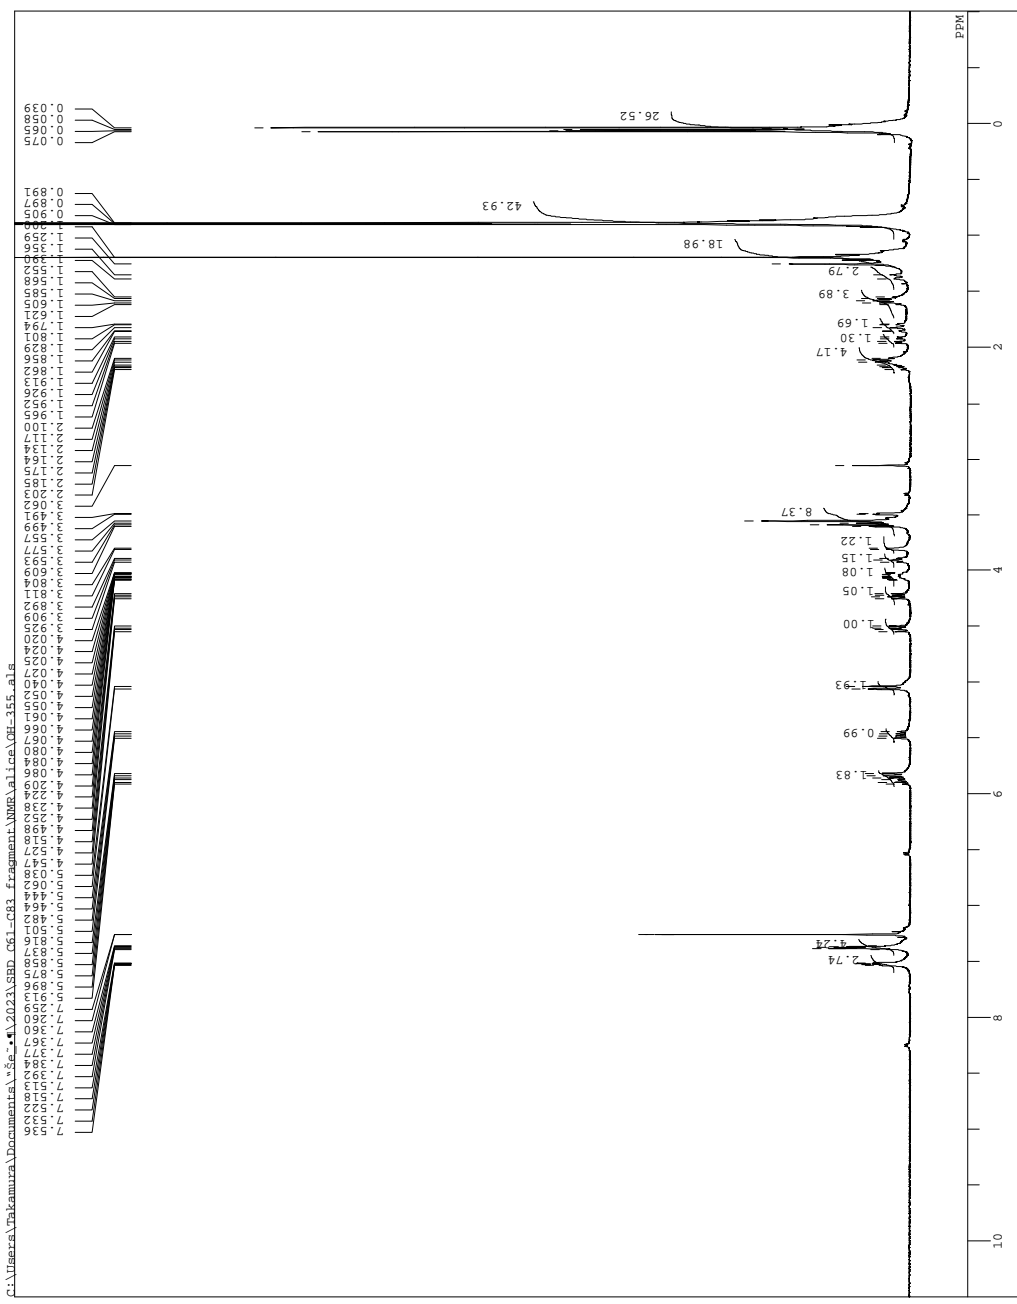

DFILE OH-355\_13c.als  
OPRTM Wed Jan 24 06:16:47 2018  
OBNUC 13C  
EXMOD BCM  
L 1  
F1 100.40 MHz  
SFO 125.700 MHz  
OBFTN 10500.00 Hz  
RESOLV 0.500 Hz  
PRQD 2713296 Hz  
SCANS 10000  
ACQTM 1.2039 sec  
PM 1.6780 USEC  
PWL  
IRNUC 1H  
L 1  
SOLNT CDCL3  
EXREF 77.00 ppm  
RGAIN 2.00 Hz

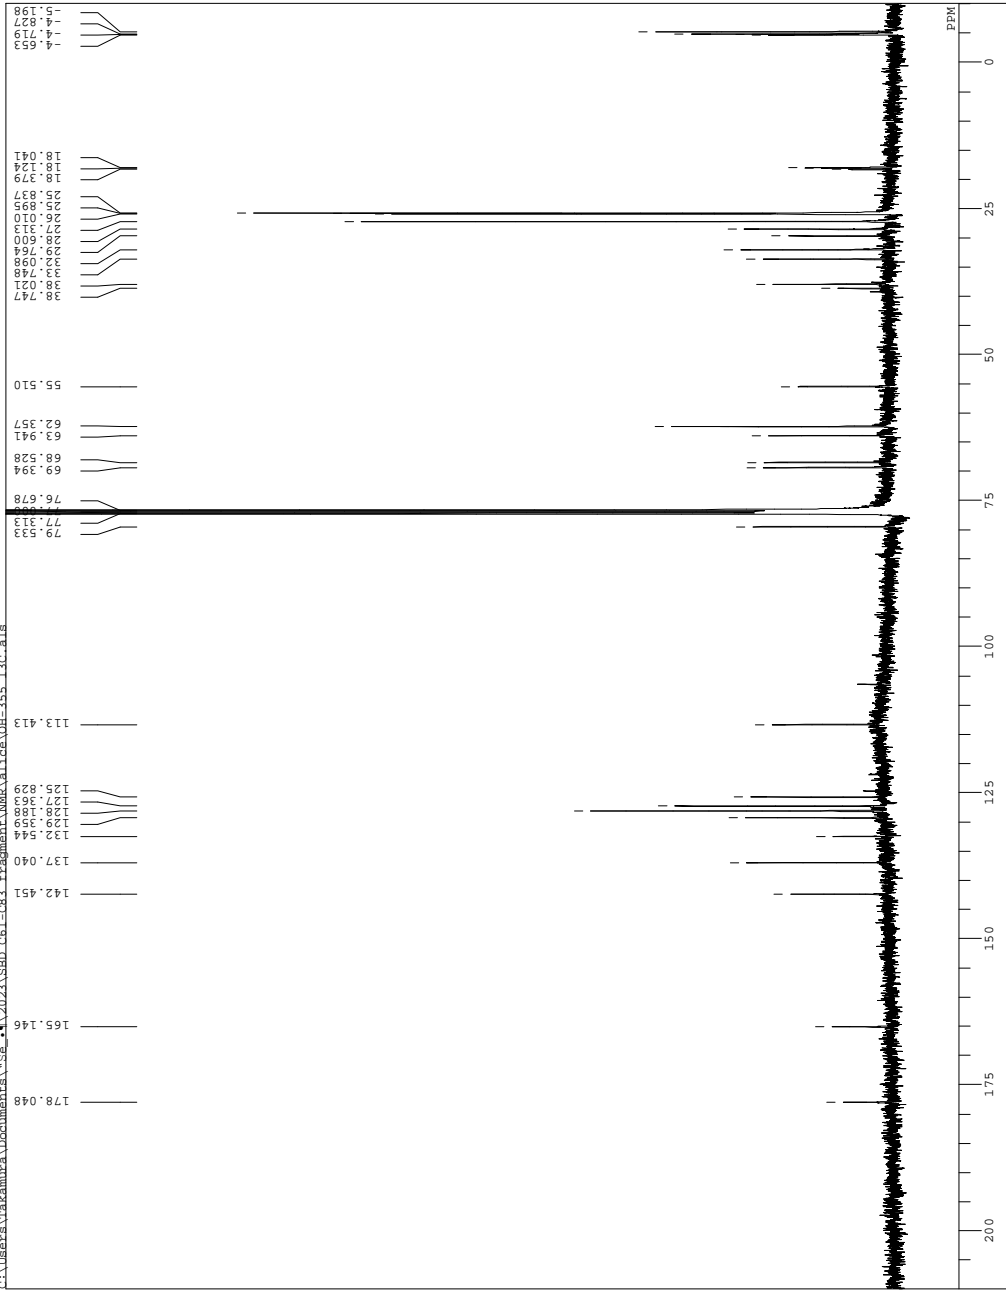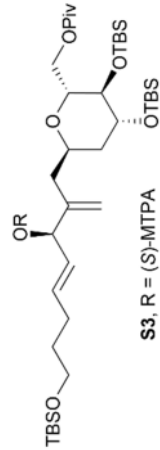

C:\Users\takamura\Documents\Se...2023\BHD\_C61-C83\_Fragment\MNR\Ice\OH-356.als  
 FILE OH-356.als  
 COMMT Wed Jan 24 23:04:23 2018  
 DATE Wed Jan 24 23:04:23 2018  
 DEPT 1H  
 PULPROG zgpg30  
 PROCNO 1  
 AQUIRE 399.65 MHz  
 OBSET 124.00 MHz  
 FIDRES 0.152768 Hz  
 POINT1 7993.60 Hz  
 SCANS 4  
 ACQTIME 4.0893 sec  
 F2 - 2.9010 sec  
 PD 6.40 usec  
 PULPROG 1H  
 CTEMP 24.4 c  
 SLOTT CDCL3  
 SOLVENT CDCL3  
 REF 7.26 ppm  
 RGAIN 2.00 ppm  
 1.17

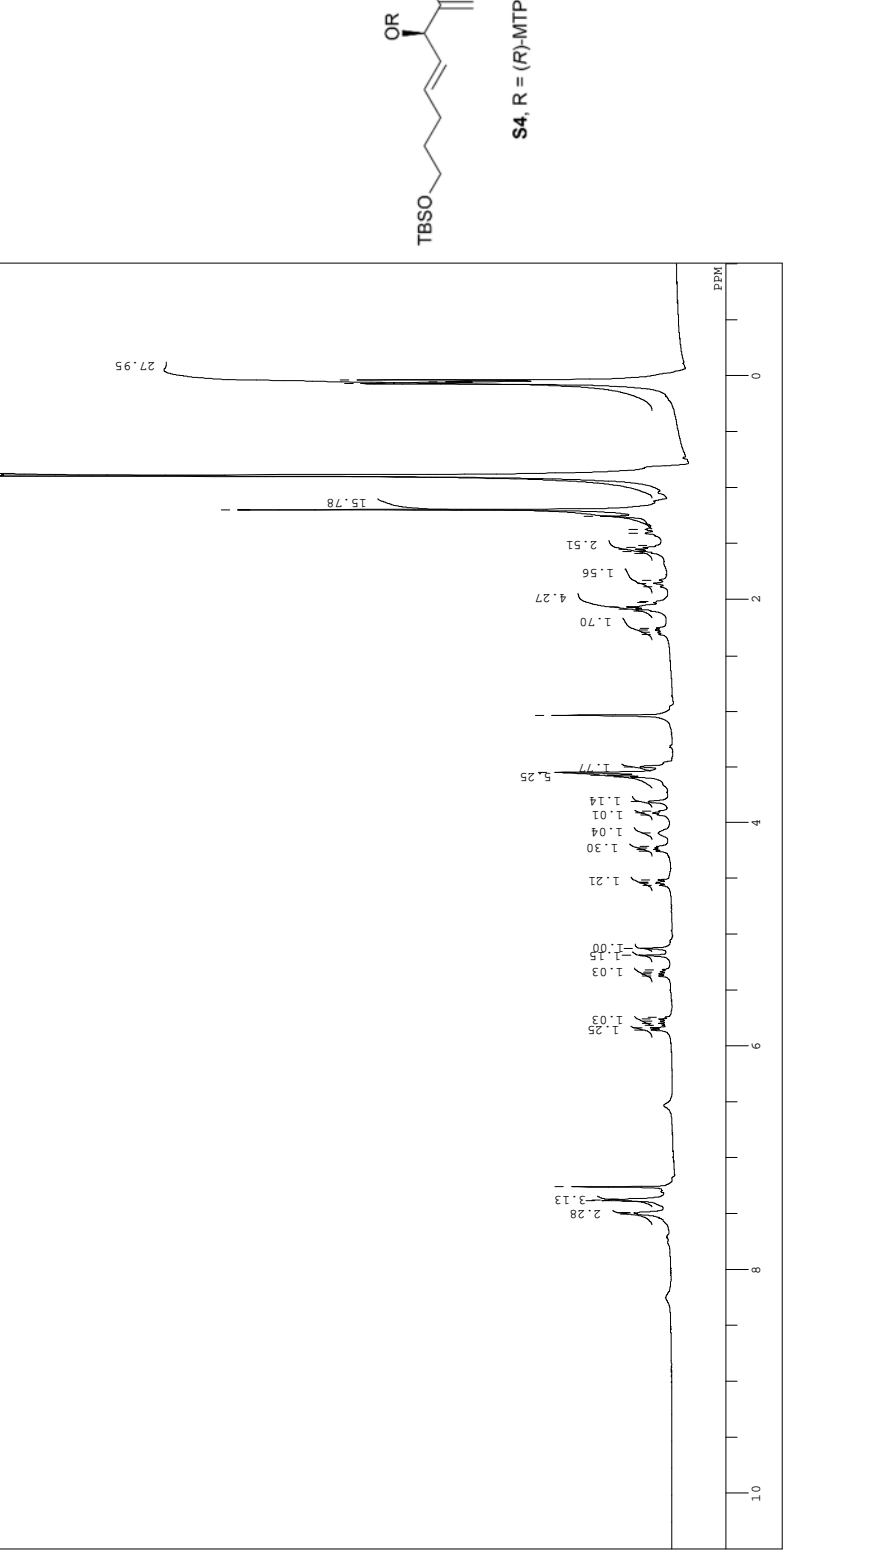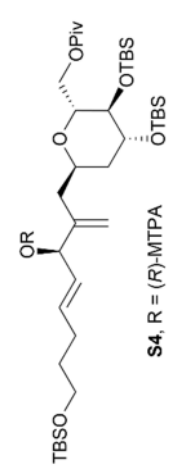

C:\Users\Takamura\Documents\Se\_2021\2HD\_C61-C81\_Fragment\NMR\13C\OH-356\_13C-als  
 OH-356\_13C-als  
 DATE Thu Jan 25 07:28:54 2018  
 TIME 13:55  
 INSTR LC  
 PULSE PROB 1H  
 PROC F2  
 AQC 100.40 MHz  
 DECOUPL 125.00 MHz  
 ORBIT 10532768 Hz  
 POINT 27173.90 Hz  
 FREQ 100.40 MHz  
 SCANN 1.0000 sec  
 PD 1.7940 sec  
 PULPROG zgpg30  
 PWD 6.80 usec  
 TEMPC 27.9 C  
 SLVNT CDCL3  
 SREF 77.00 ppm  
 RGAIN 2.25

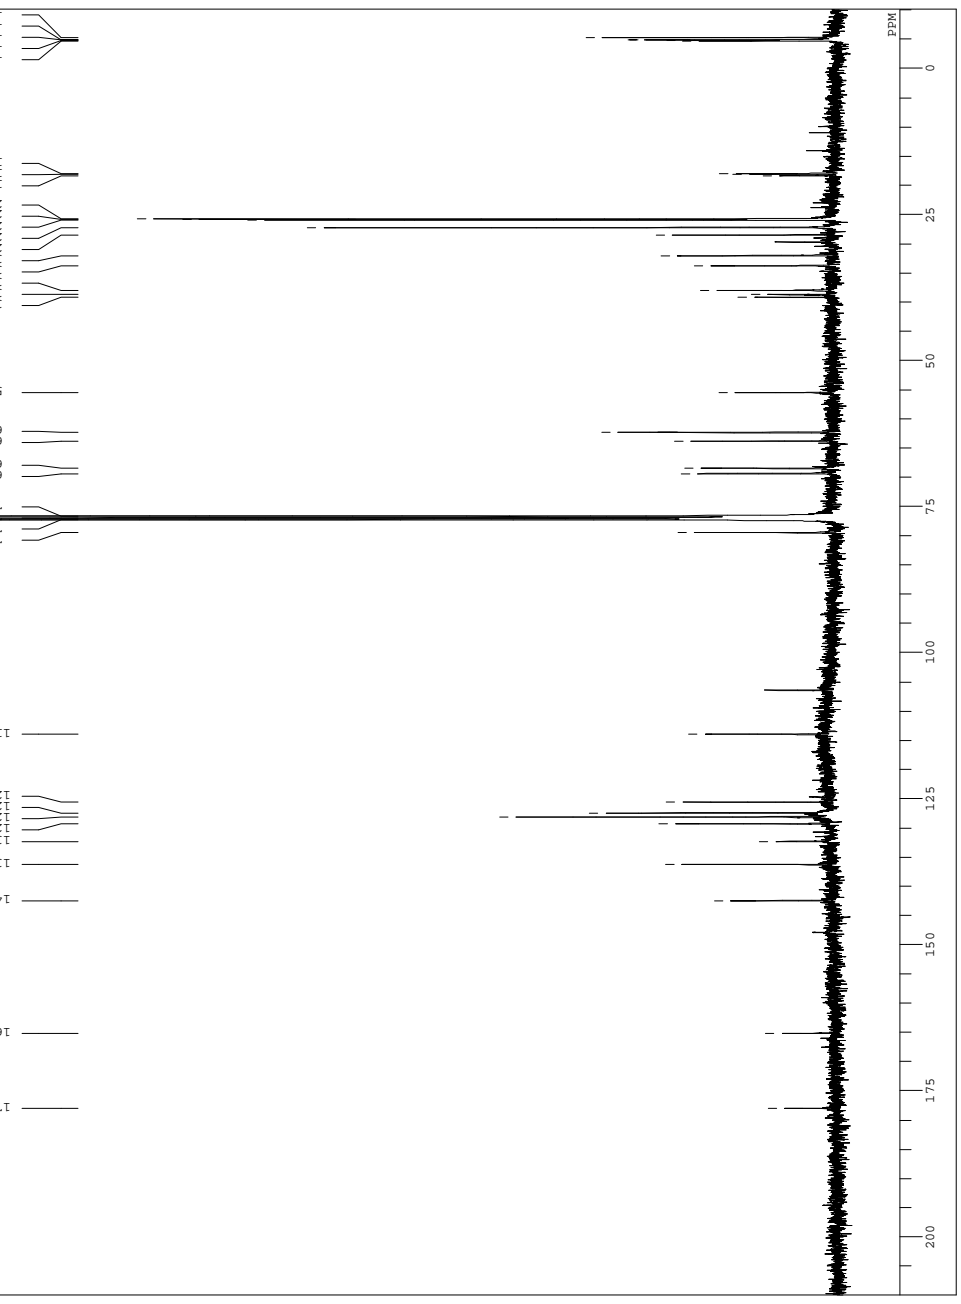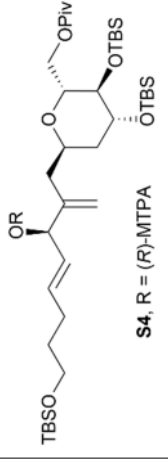

```

NAME OH-358.als
DATE_ Mon Jan 29 20:33:41 2018
DIRNAME
PROBHD 5
PULPROG zgpg30
DATTIM Mon Jan 29 20:33:41 2018
OBNUC 1H
DECO 1
AQ 4.00
RG 1.00
SFO 399.65 MHz
OBSEFT 124.00 kHz
RG 1.00
DGT 105307.00 Hz
RG 1.00
FREQ 798337.60 Hz
RG 1.00
SCANS 4
AQ 0.0898 sec
PD 2.9010 sec
DD 6.40 usec
RG 1.00
PWL 24.4 c
RG 1.00
SOLVENT CDCL3
EXREF 7.26 ppm
RGAIN 0.112

```

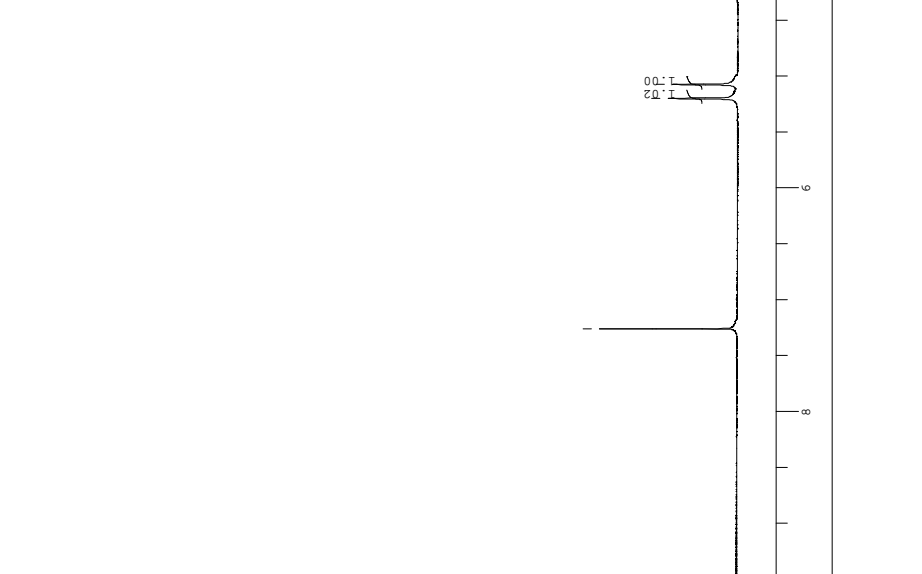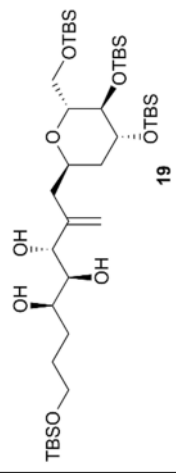



OFID: OH-358\_13C\_als  
 DATE\_: Mon Jan 29 21:01:05 2018  
 OBNUC: 13C  
 OBSRO: ECH  
 OBSRT: 100.40 MHz  
 OBSF1: 125.00 KHz  
 OBSF2: 105.9768 Hz  
 FREQ1: 27173.90 Hz  
 SCANS: 432  
 AQT: 1.432 sec  
 PD: 1.7940 sec  
 PUL: 6.80 usec  
 CTB: 1H  
 CTB2: 27.5 c  
 SLANT: CDCL3  
 EXPT: 77.00 ppm  
 EXPE: 2.35 Hz  
 RGAIN:

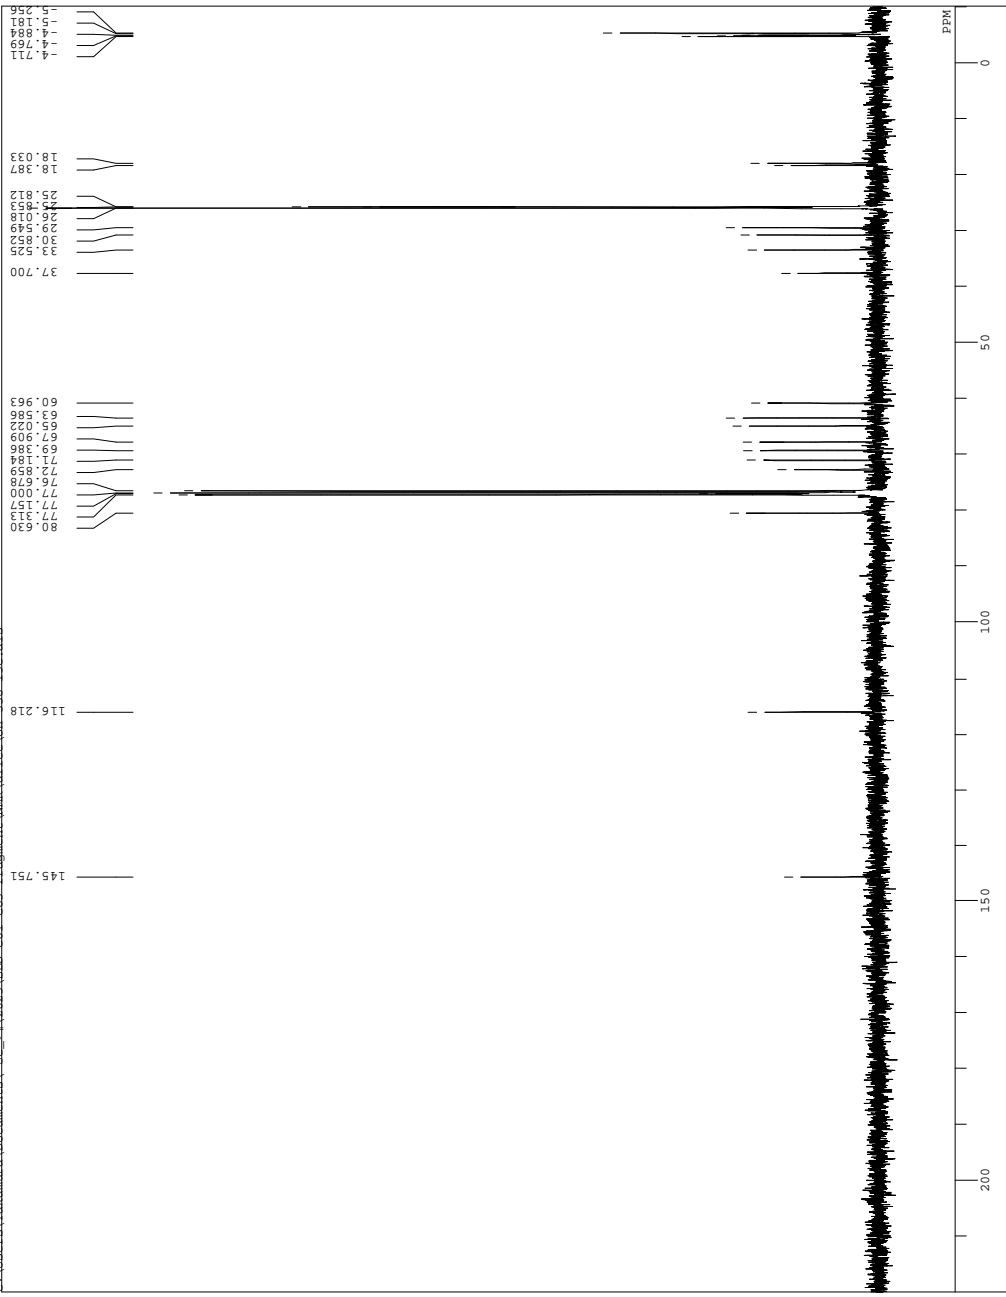

DFIL2 OH-324-1.als  
 DATE\_ Fri Jan 26 22:00:30 2018  
 OBNUC 1H  
 OBSOBS 10500.00 Hz  
 OBSFREQ 399.65 MHz  
 OBSF2 124.00 KHz  
 P1 1.00 sec  
 P2 2.9016 sec  
 P3 6.40 usec  
 P4 24.4 c  
 IRMUC 1H  
 SLVNT CDCL3  
 EXREF  
 RGAIN 0.17

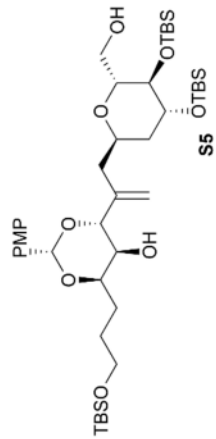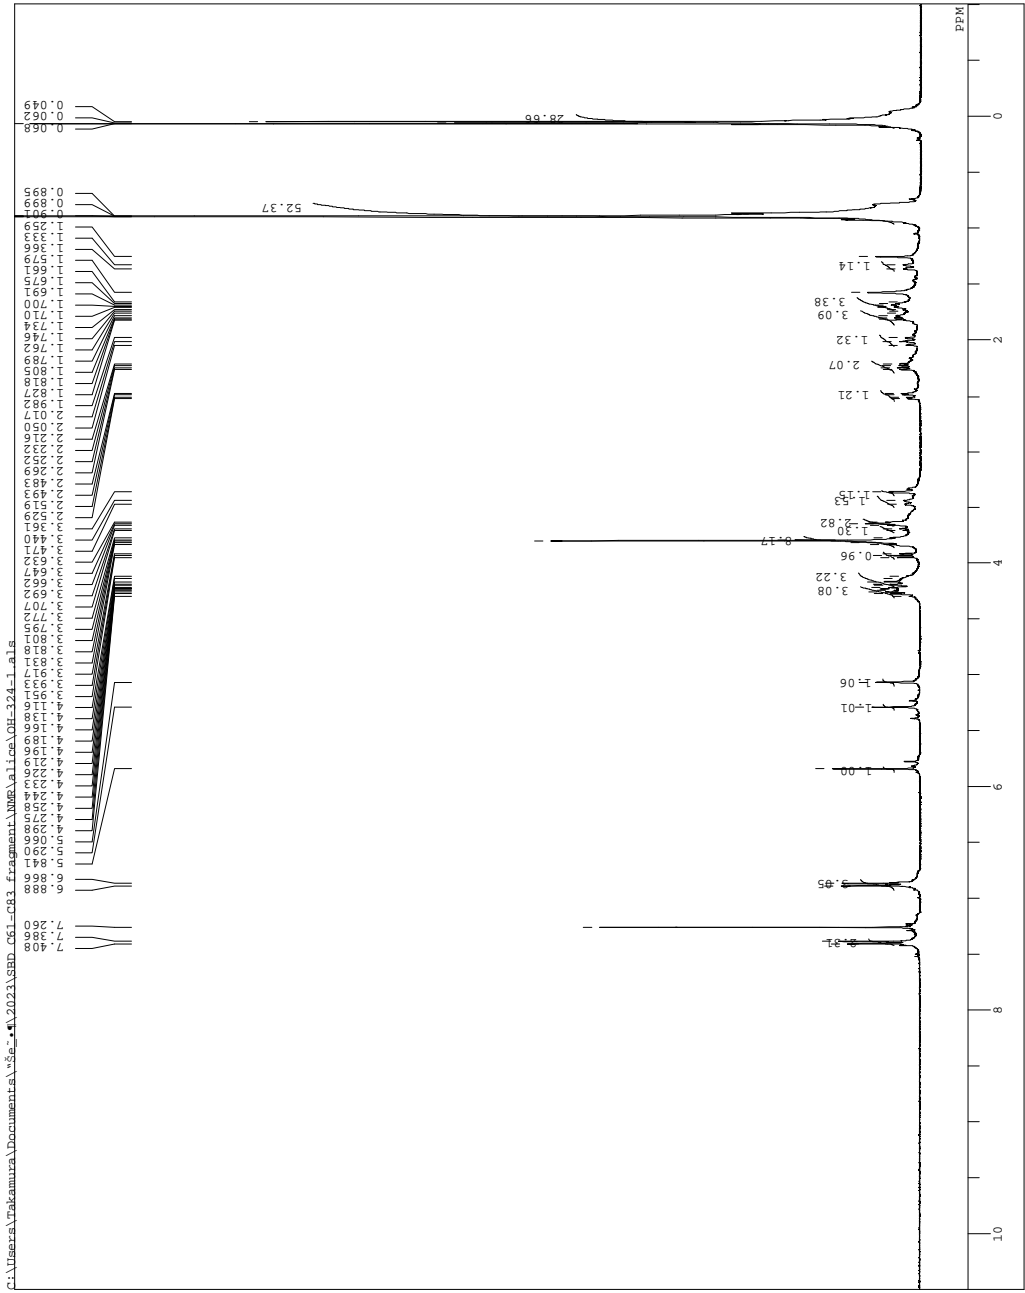



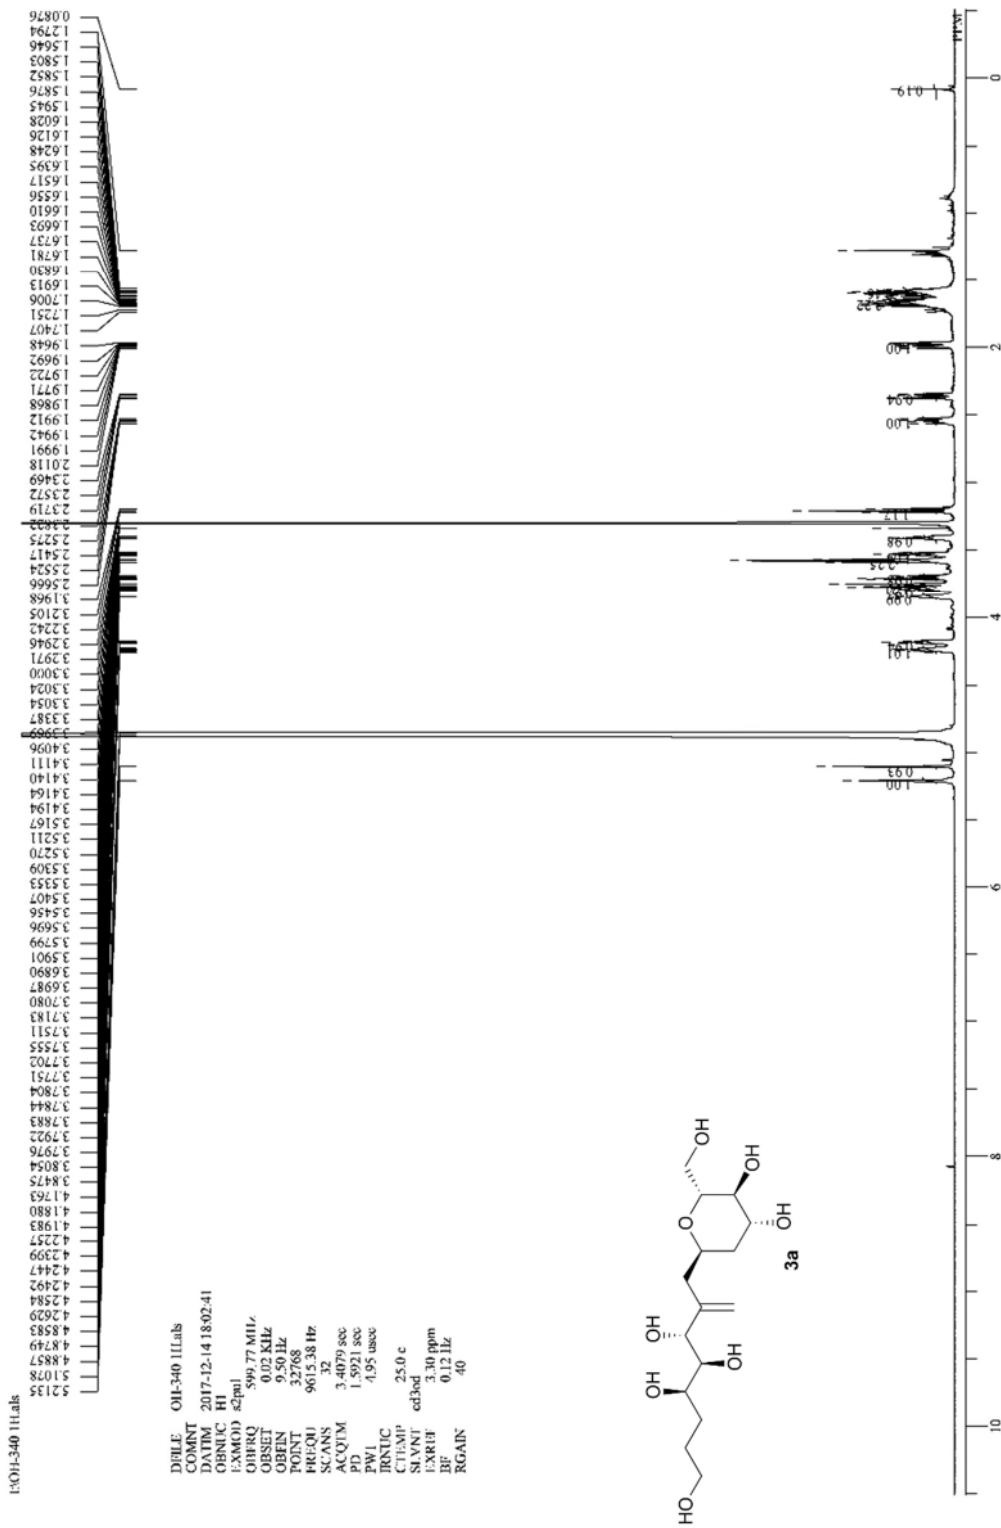

1:OH1-340 13C.acs

DIRLE OH1-340 13C.acs  
COMINT  
DATIM 2017-12-15 04:07:00  
OBNUIC C13  
EXMOD s2(pul)  
COPRQ 150.82 MHz  
OBSF 7.97 KHz  
OBSFEN 8.20 Hz  
POINT 32708  
PRG00 37878.79 Hz  
ACQNY 66.66 Hz  
ACQTM 0.8651 sec  
PD 2.1349 sec  
PWL 5.20 usec  
TRNUIC  
CTEMP 25.0 c  
SIYNT ed3od  
EXRFH 49.00 ppm  
BF 1.00 Hz  
RGAIN 60

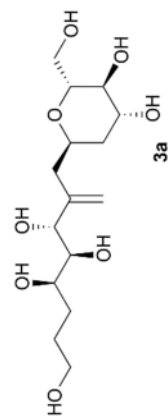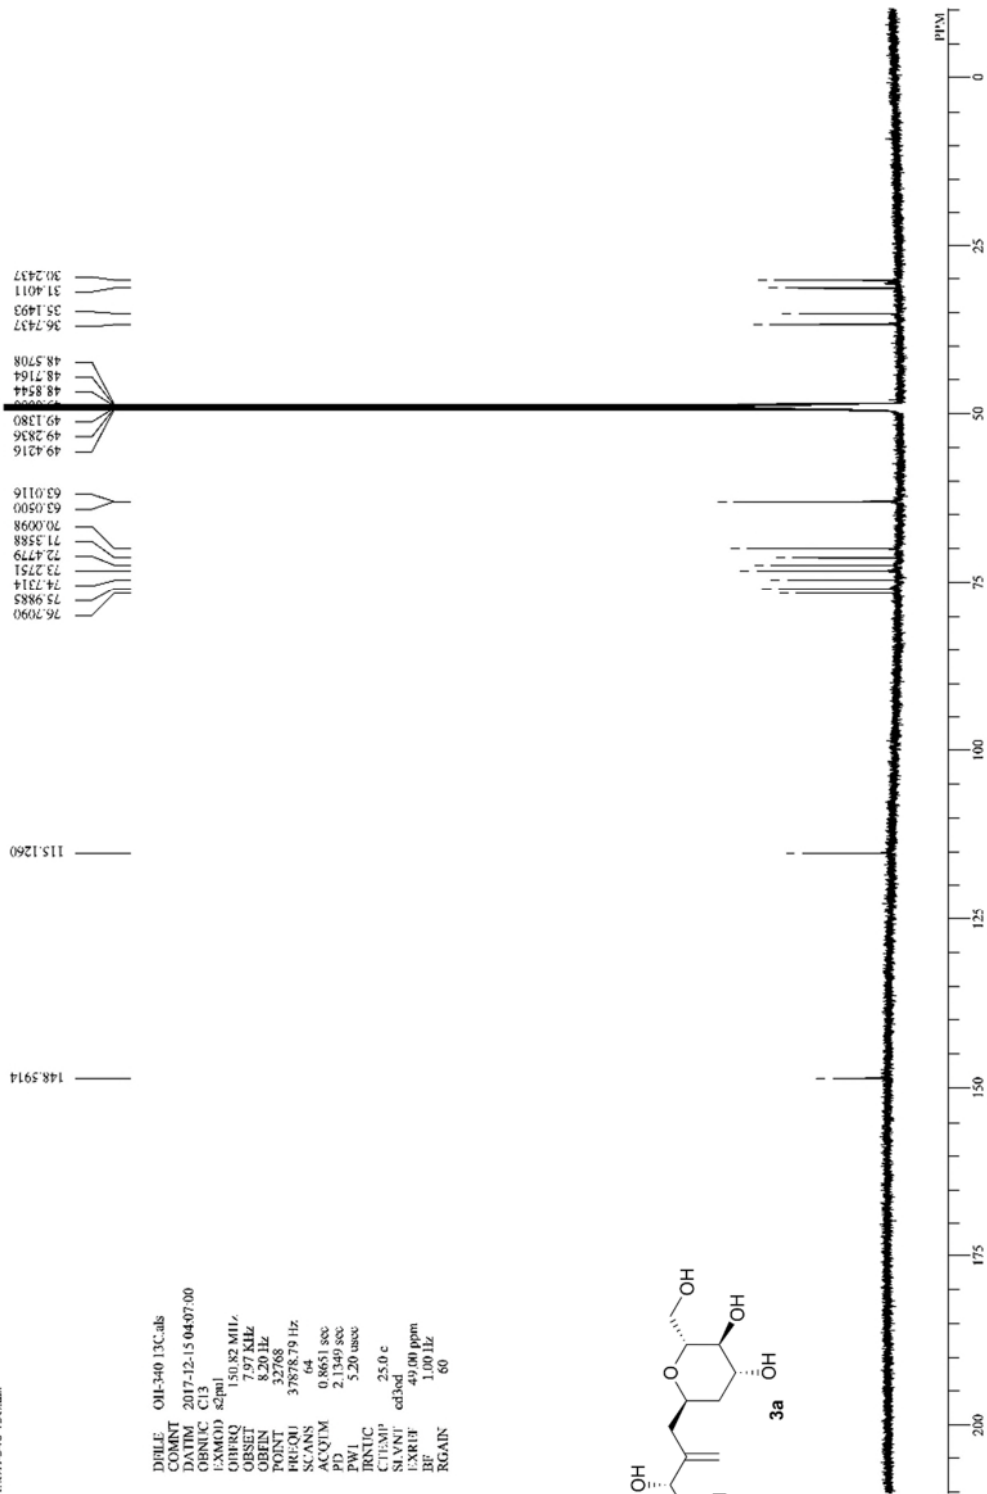



copy gmqc

| SAMPLE  |             | NAME     |          | ACQUISITION |      | ABRAYS |       |
|---------|-------------|----------|----------|-------------|------|--------|-------|
| Date    | 16 Dec 2017 | hr       | mm       | name        | name | phase  | phase |
| solvent | CD3OD       | name     | name     | name        | name | name   | name  |
| nmr     | 600         | freq     | mg       | mag         | mag  | 1      | 1     |
| sw      | ACQUISITION | mag      | 6400     | mag         | 6400 | 1      | 1     |
| st      | 9415.4      | temp     | not used | sf          | SPIN | 1      | 1     |
| sp      | 6.150       | not used |          | sf          | SPIN | 1      | 1     |
| sa      | 2884        | gain     | 40       | sf          | SPIN | 1      | 1     |
| sb      | 4000        | gain     | 9        | sf          | SPIN | 1      | 1     |
| sc      | 4000        | gain     | 9        | sf          | SPIN | 1      | 1     |
| sd      | 1.000       | gain     | 5247     | sf          | SPIN | 1      | 1     |
| se      | 32          | gain     | 6.000000 | sf          | SPIN | 1      | 1     |
| sf      | 3.977       | gain     | 6.000000 | sf          | SPIN | 1      | 1     |
| sg      | 34691.1     | gain     | 6.000000 | sf          | SPIN | 1      | 1     |
| sh      | 34691.1     | gain     | 6.000000 | sf          | SPIN | 1      | 1     |
| si      | 34691.1     | gain     | 6.000000 | sf          | SPIN | 1      | 1     |
| sj      | 34691.1     | gain     | 6.000000 | sf          | SPIN | 1      | 1     |
| sk      | 34691.1     | gain     | 6.000000 | sf          | SPIN | 1      | 1     |
| sl      | 34691.1     | gain     | 6.000000 | sf          | SPIN | 1      | 1     |
| sm      | 34691.1     | gain     | 6.000000 | sf          | SPIN | 1      | 1     |
| sn      | 34691.1     | gain     | 6.000000 | sf          | SPIN | 1      | 1     |
| so      | 34691.1     | gain     | 6.000000 | sf          | SPIN | 1      | 1     |
| sp      | 34691.1     | gain     | 6.000000 | sf          | SPIN | 1      | 1     |
| sq      | 34691.1     | gain     | 6.000000 | sf          | SPIN | 1      | 1     |
| sr      | 34691.1     | gain     | 6.000000 | sf          | SPIN | 1      | 1     |
| ss      | 34691.1     | gain     | 6.000000 | sf          | SPIN | 1      | 1     |
| st      | 34691.1     | gain     | 6.000000 | sf          | SPIN | 1      | 1     |
| su      | 34691.1     | gain     | 6.000000 | sf          | SPIN | 1      | 1     |
| sv      | 34691.1     | gain     | 6.000000 | sf          | SPIN | 1      | 1     |
| sw      | 34691.1     | gain     | 6.000000 | sf          | SPIN | 1      | 1     |
| sx      | 34691.1     | gain     | 6.000000 | sf          | SPIN | 1      | 1     |
| sy      | 34691.1     | gain     | 6.000000 | sf          | SPIN | 1      | 1     |
| sz      | 34691.1     | gain     | 6.000000 | sf          | SPIN | 1      | 1     |
| ta      | 34691.1     | gain     | 6.000000 | sf          | SPIN | 1      | 1     |
| tb      | 34691.1     | gain     | 6.000000 | sf          | SPIN | 1      | 1     |
| tc      | 34691.1     | gain     | 6.000000 | sf          | SPIN | 1      | 1     |
| td      | 34691.1     | gain     | 6.000000 | sf          | SPIN | 1      | 1     |
| te      | 34691.1     | gain     | 6.000000 | sf          | SPIN | 1      | 1     |
| tf      | 34691.1     | gain     | 6.000000 | sf          | SPIN | 1      | 1     |
| tg      | 34691.1     | gain     | 6.000000 | sf          | SPIN | 1      | 1     |
| th      | 34691.1     | gain     | 6.000000 | sf          | SPIN | 1      | 1     |
| ti      | 34691.1     | gain     | 6.000000 | sf          | SPIN | 1      | 1     |
| tj      | 34691.1     | gain     | 6.000000 | sf          | SPIN | 1      | 1     |
| tk      | 34691.1     | gain     | 6.000000 | sf          | SPIN | 1      | 1     |
| tl      | 34691.1     | gain     | 6.000000 | sf          | SPIN | 1      | 1     |
| tm      | 34691.1     | gain     | 6.000000 | sf          | SPIN | 1      | 1     |
| tn      | 34691.1     | gain     | 6.000000 | sf          | SPIN | 1      | 1     |
| to      | 34691.1     | gain     | 6.000000 | sf          | SPIN | 1      | 1     |
| tp      | 34691.1     | gain     | 6.000000 | sf          | SPIN | 1      | 1     |
| aq      | 34691.1     | gain     | 6.000000 | sf          | SPIN | 1      | 1     |
| ar      | 34691.1     | gain     | 6.000000 | sf          | SPIN | 1      | 1     |
| at      | 34691.1     | gain     | 6.000000 | sf          | SPIN | 1      | 1     |
| au      | 34691.1     | gain     | 6.000000 | sf          | SPIN | 1      | 1     |
| av      | 34691.1     | gain     | 6.000000 | sf          | SPIN | 1      | 1     |
| aw      | 34691.1     | gain     | 6.000000 | sf          | SPIN | 1      | 1     |
| ax      | 34691.1     | gain     | 6.000000 | sf          | SPIN | 1      | 1     |
| ay      | 34691.1     | gain     | 6.000000 | sf          | SPIN | 1      | 1     |
| az      | 34691.1     | gain     | 6.000000 | sf          | SPIN | 1      | 1     |
| ba      | 34691.1     | gain     | 6.000000 | sf          | SPIN | 1      | 1     |
| bb      | 34691.1     | gain     | 6.000000 | sf          | SPIN | 1      | 1     |
| bc      | 34691.1     | gain     | 6.000000 | sf          | SPIN | 1      | 1     |
| bd      | 34691.1     | gain     | 6.000000 | sf          | SPIN | 1      | 1     |
| be      | 34691.1     | gain     | 6.000000 | sf          | SPIN | 1      | 1     |
| bf      | 34691.1     | gain     | 6.000000 | sf          | SPIN | 1      | 1     |
| bg      | 34691.1     | gain     | 6.000000 | sf          | SPIN | 1      | 1     |
| bh      | 34691.1     | gain     | 6.000000 | sf          | SPIN | 1      | 1     |
| bi      | 34691.1     | gain     | 6.000000 | sf          | SPIN | 1      | 1     |
| bj      | 34691.1     | gain     | 6.000000 | sf          | SPIN | 1      | 1     |
| bk      | 34691.1     | gain     | 6.000000 | sf          | SPIN | 1      | 1     |
| bl      | 34691.1     | gain     | 6.000000 | sf          | SPIN | 1      | 1     |
| bm      | 34691.1     | gain     | 6.000000 | sf          | SPIN | 1      | 1     |
| bn      | 34691.1     | gain     | 6.000000 | sf          | SPIN | 1      | 1     |
| bo      | 34691.1     | gain     | 6.000000 | sf          | SPIN | 1      | 1     |
| bp      | 34691.1     | gain     | 6.000000 | sf          | SPIN | 1      | 1     |
| bq      | 34691.1     | gain     | 6.000000 | sf          | SPIN | 1      | 1     |
| br      | 34691.1     | gain     | 6.000000 | sf          | SPIN | 1      | 1     |
| bs      | 34691.1     | gain     | 6.000000 | sf          | SPIN | 1      | 1     |
| bt      | 34691.1     | gain     | 6.000000 | sf          | SPIN | 1      | 1     |
| bu      | 34691.1     | gain     | 6.000000 | sf          | SPIN | 1      | 1     |
| bv      | 34691.1     | gain     | 6.000000 | sf          | SPIN | 1      | 1     |
| bv      | 34691.1     | gain     | 6.000000 | sf          | SPIN | 1      | 1     |
| bw      | 34691.1     | gain     | 6.000000 | sf          | SPIN | 1      | 1     |
| bx      | 34691.1     | gain     | 6.000000 | sf          | SPIN | 1      | 1     |
| by      | 34691.1     | gain     | 6.000000 | sf          | SPIN | 1      | 1     |
| bz      | 34691.1     | gain     | 6.000000 | sf          | SPIN | 1      | 1     |
| ca      | 34691.1     | gain     | 6.000000 | sf          | SPIN | 1      | 1     |
| cb      | 34691.1     | gain     | 6.000000 | sf          | SPIN | 1      | 1     |
| cc      | 34691.1     | gain     | 6.000000 | sf          | SPIN | 1      | 1     |
| cd      | 34691.1     | gain     | 6.000000 | sf          | SPIN | 1      | 1     |
| ce      | 34691.1     | gain     | 6.000000 | sf          | SPIN | 1      | 1     |
| cf      | 34691.1     | gain     | 6.000000 | sf          | SPIN | 1      | 1     |
| cg      | 34691.1     | gain     | 6.000000 | sf          | SPIN | 1      | 1     |
| ch      | 34691.1     | gain     | 6.000000 | sf          | SPIN | 1      | 1     |
| ci      | 34691.1     | gain     | 6.000000 | sf          | SPIN | 1      | 1     |
| cj      | 34691.1     | gain     | 6.000000 | sf          | SPIN | 1      | 1     |
| ck      | 34691.1     | gain     | 6.000000 | sf          | SPIN | 1      | 1     |
| cl      | 34691.1     | gain     | 6.000000 | sf          | SPIN | 1      | 1     |
| cm      | 34691.1     | gain     | 6.000000 | sf          | SPIN | 1      | 1     |
| cn      | 34691.1     | gain     | 6.000000 | sf          | SPIN | 1      | 1     |
| co      | 34691.1     | gain     | 6.000000 | sf          | SPIN | 1      | 1     |
| cp      | 34691.1     | gain     | 6.000000 | sf          | SPIN | 1      | 1     |
| cq      | 34691.1     | gain     | 6.000000 | sf          | SPIN | 1      | 1     |
| cr      | 34691.1     | gain     | 6.000000 | sf          | SPIN | 1      | 1     |
| cs      | 34691.1     | gain     | 6.000000 | sf          | SPIN | 1      | 1     |
| ct      | 34691.1     | gain     | 6.000000 | sf          | SPIN | 1      | 1     |
| cu      | 34691.1     | gain     | 6.000000 | sf          | SPIN | 1      | 1     |
| cv      | 34691.1     | gain     | 6.000000 | sf          | SPIN | 1      | 1     |
| cw      | 34691.1     | gain     | 6.000000 | sf          | SPIN | 1      | 1     |
| cx      | 34691.1     | gain     | 6.000000 | sf          | SPIN | 1      | 1     |
| cy      | 34691.1     | gain     | 6.000000 | sf          | SPIN | 1      | 1     |
| cz      | 34691.1     | gain     | 6.000000 | sf          | SPIN | 1      | 1     |

HMQC (600 MHz, CD<sub>3</sub>OD)

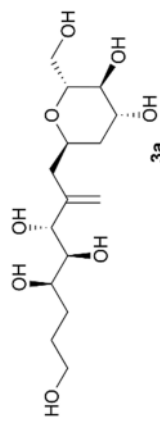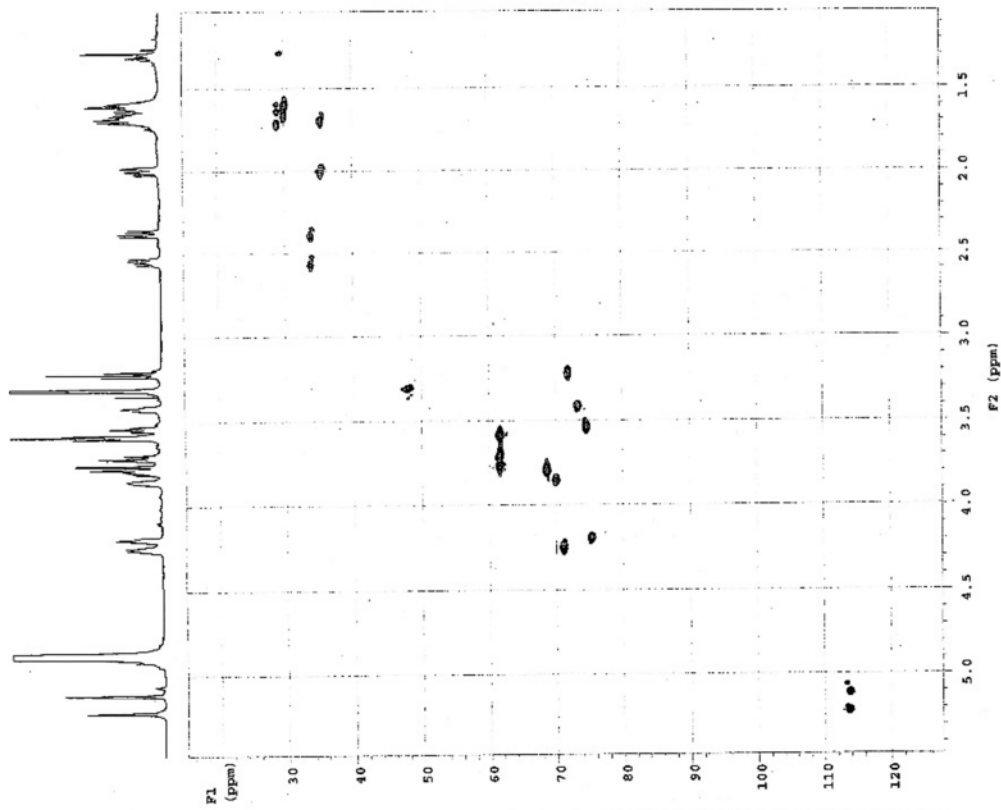

exp3\_080604

SAMPLES ACQUISITION ARRAY  
 date Dec 14 2017 hr in phann  
 name 0806 array 400  
 sample 0806 7 arrayid  
 SW ACQUISITION hsq014 4408 1 phase  
 AT 9.150 temp not used . 2  
 AP 2866 gain not used 66  
 AS 4400 sp1.0 6  
 AS 1.000 sp1.01 6  
 AS 1.000 sp1.01 6  
 AS 32 g1 0.001600  
 AS 36199.1 sp3 0.001600  
 AS 390 sp4 0.001600  
 AS 44000 sp5 0.001600  
 Phase arrayed P2 PROCESSING  
 PRESENTATION 00 -0.075  
 namecode n abs not used  
 wct 2 in 4096  
 TRANSMITTER P1 PROCESSING  
 LA 594.771 sp1 0.0016  
 LOF 594.8 sp1 not used  
 type 59 501 2048  
 PW 9.900 DISPLAY  
 DECOUPLER 659.2  
 ON C13 WP 2777.2  
 OFF 1544.0 WP 2777.2  
 SW 1544.0 WP 2777.2  
 decouple W4 channel W11 25134.3  
 Amf 15688 rfp 1293.0  
 spwr 40 rfp1 2564.3  
 pwr1 85 rfp1 2564.3  
 pwr 8.000 WC 2607 1584.0  
 f1sh 144.0 ac 0  
 f1wh 8.0 WC2 148.0  
 ADIABATIC ac2 0  
 purification comm: sub- vs 218  
 3000000 2500000  
 p001v1180 54 at cdc av 4  
 p001v180 490.0

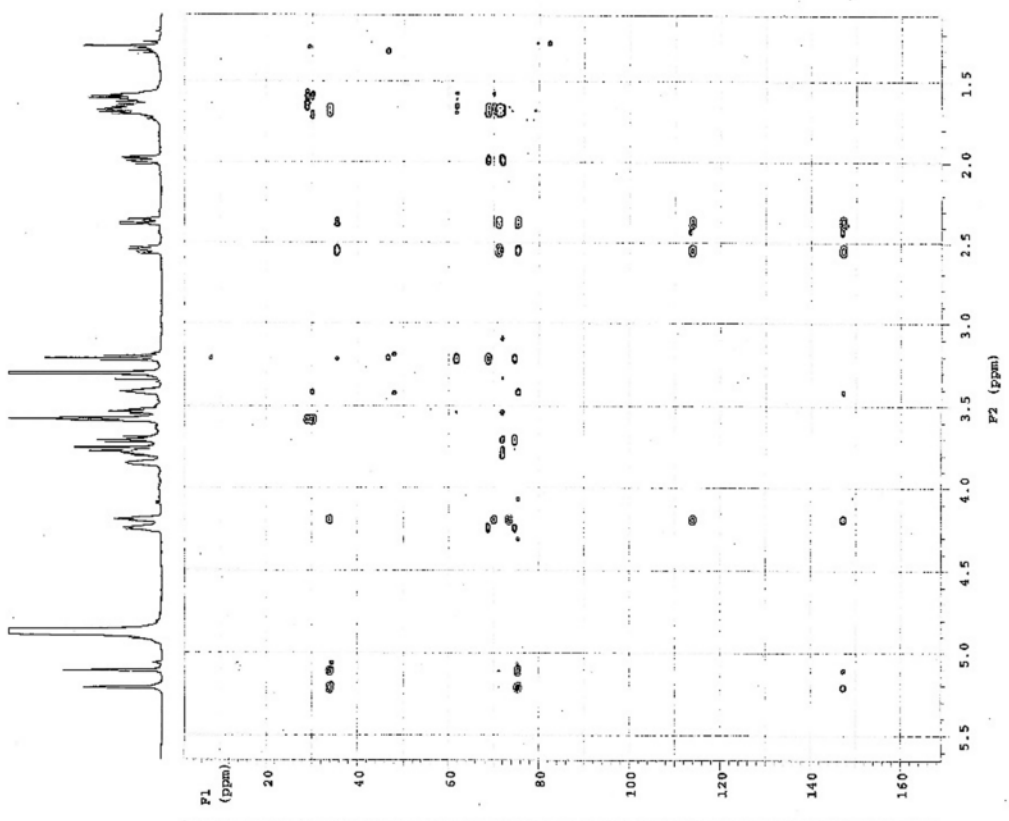

HMBC (600 MHz, CD<sub>3</sub>OD)

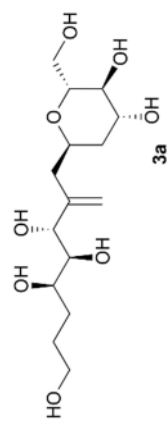



C:\Users\takamura\Documents\Se\*\4\2023\SRD\_C61-CB3\_Fragment\MRE\alica\OH-359-3\_als  
 FILE OH-359-3\_als  
 DATE Tue Jan 30 22:11:20 2018  
 DATIM  
 OBNUC 1H  
 EXPRD NON  
 EXPRF  
 OBSST 399.65 MHz  
 OBSST 124.00 MHz  
 OBSST 10500.00 Hz  
 FREQ0 7953760 Hz  
 SCANS 4.0000  
 PD QTM 2.9010 sec  
 PD QTM 6.40 usec  
 FW1  
 LRNUC 1H  
 SLVNT CDCL3 24.3 C  
 EXREF 7.26 ppm  
 RGAIN 0.14

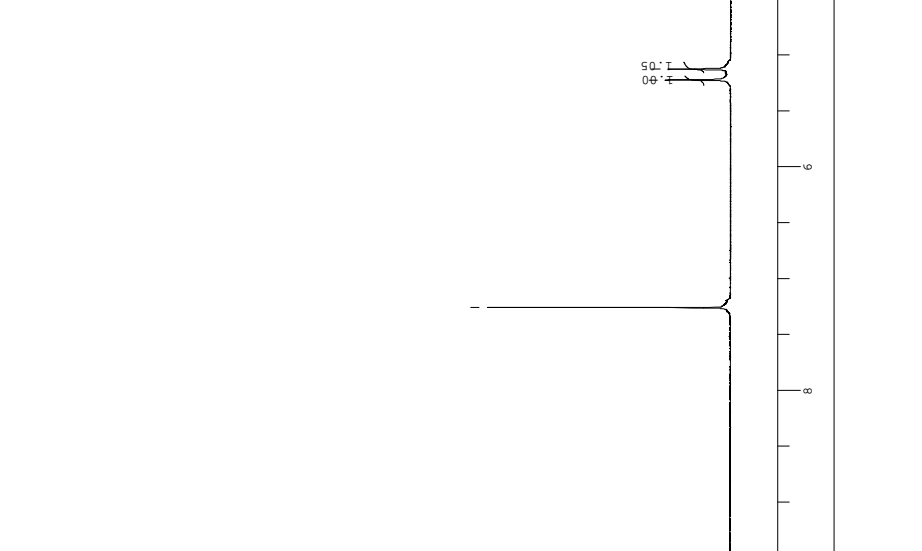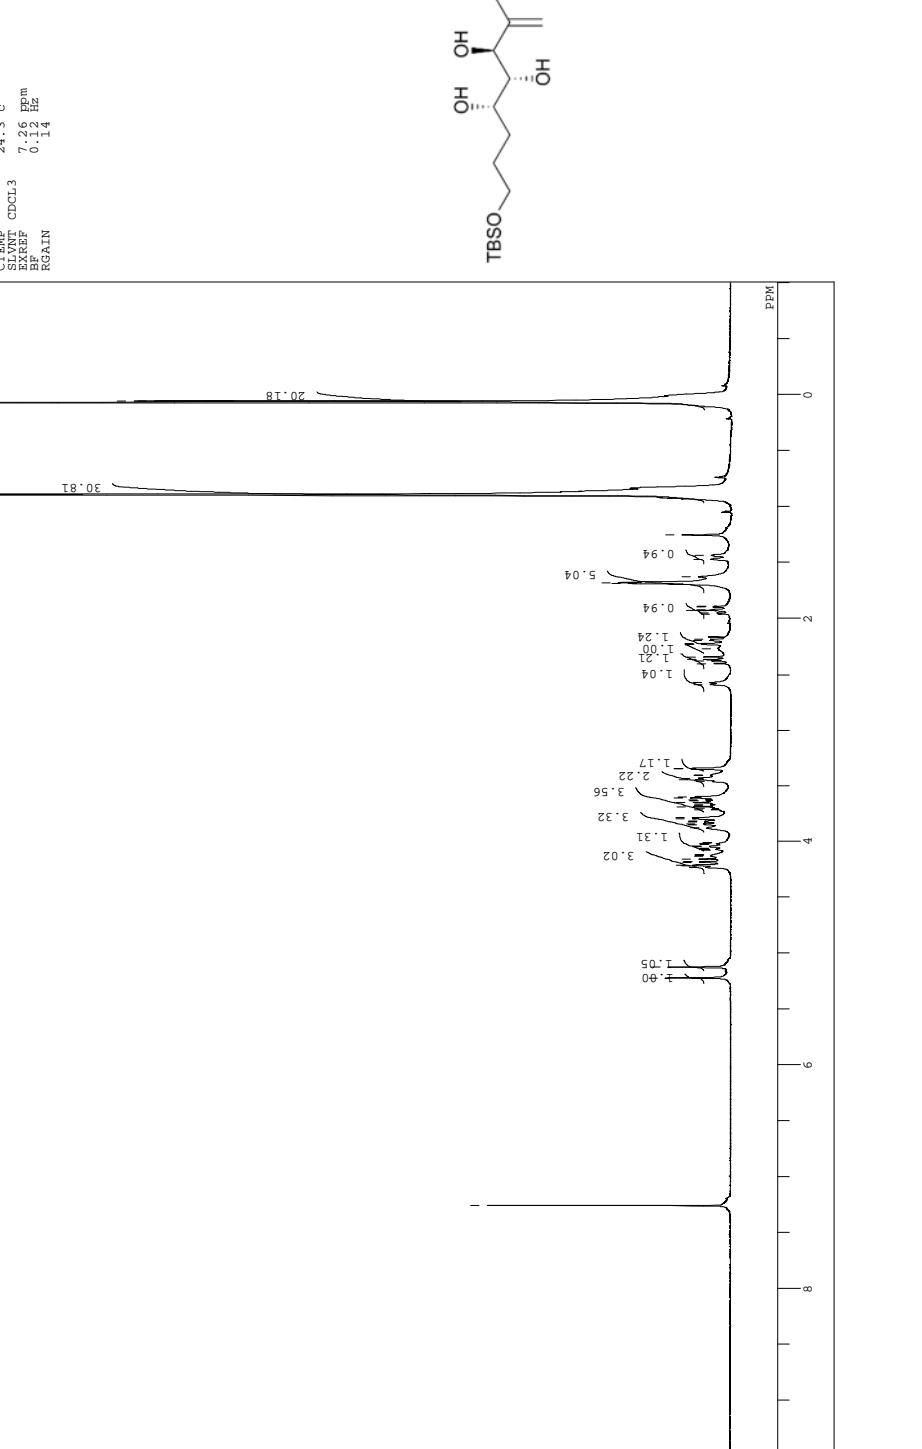

C:\Users\Takamura\Documents\se\*\2021\SRD\_c61\_c83\_fragment\MMR\alic\OH-359-3\_13c\_als

OH-359-3\_13c.als  
COMPT Mg Jan 31 06:39:51 2018  
ORBIT 13C  
EXMOD BCM  
OBSFQ 100.40 MHz  
OBSF2 10500.00 Hz  
PCINT 32768  
SCANS 2711000 Hz  
ACQTM 1.2859 sec  
PULP 1.7940 sec  
PRG1 6.60 usec  
IRNUC 1H 27.9 c  
CTEMP CDCL3 77.00 PPM  
EXREF BF 2.00 Hz  
RGAIN 25

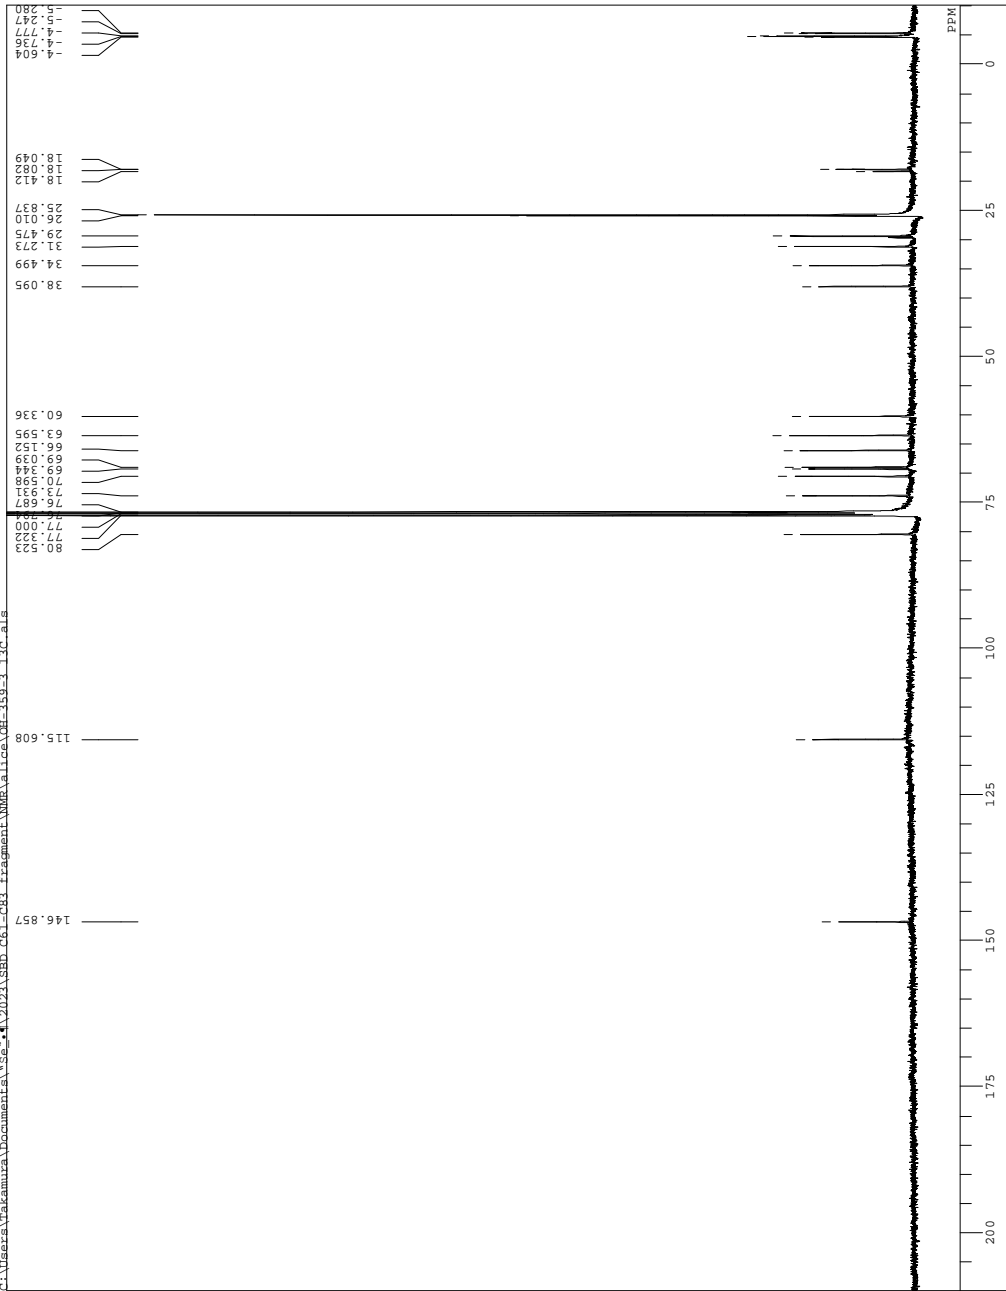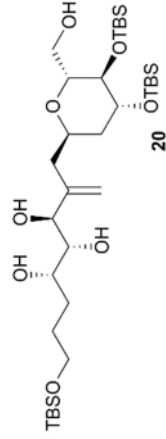



C:\Users\takamura\Documents\Se\_#\2023\SDP\_C61-CB3\_fragment\NMR\data\OH-361-1\_13C.nls

OFSI OH-361-1\_13C.nls  
 COMMT Sat Feb 03 06:52:00 2018  
 DATIM Sat Feb 03 06:52:00 2018  
 OBANOC 13C  
 OBPRO BCR  
 OBPRO 100.40 MHz  
 OBSEI 125.00 MHz  
 OBSEI 10532768 Hz  
 POINT 27173.90 Hz  
 FREQU 10000 sec  
 SCANS 1.7940 sec  
 PDQTN 6.80 usec  
 P1 27.9 c  
 CTEMP CDCL3 77.00 Ppm  
 SLVNT CDCL3 77.00 Ppm  
 SREF 2.25  
 RGAIN

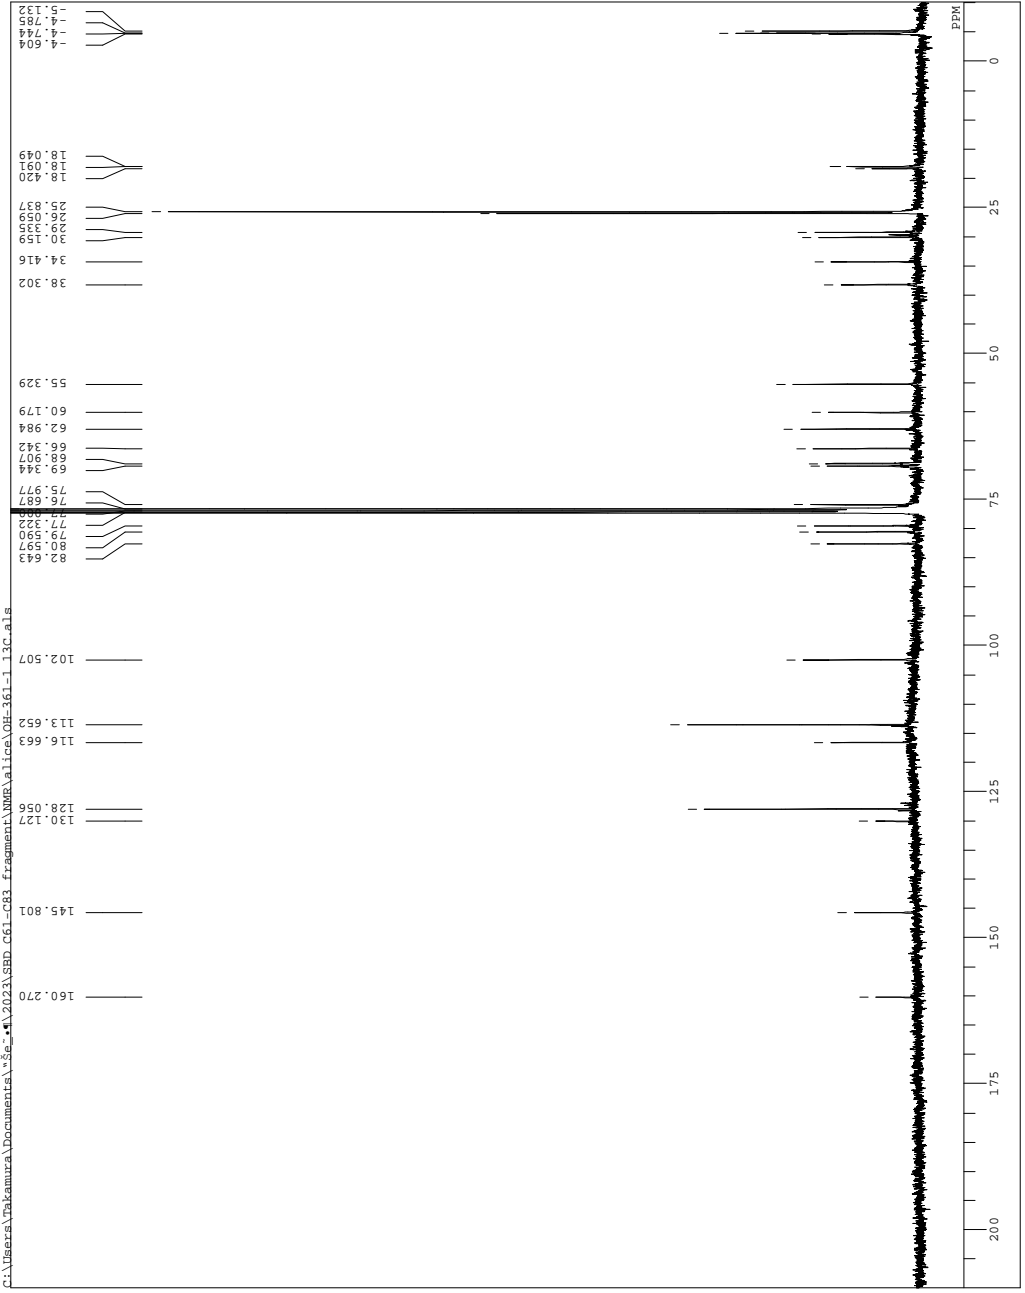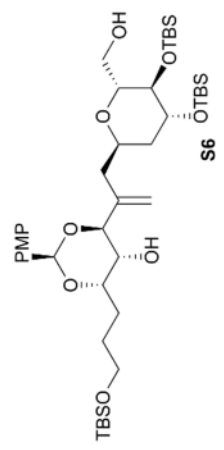

13OH-343 1H.nk

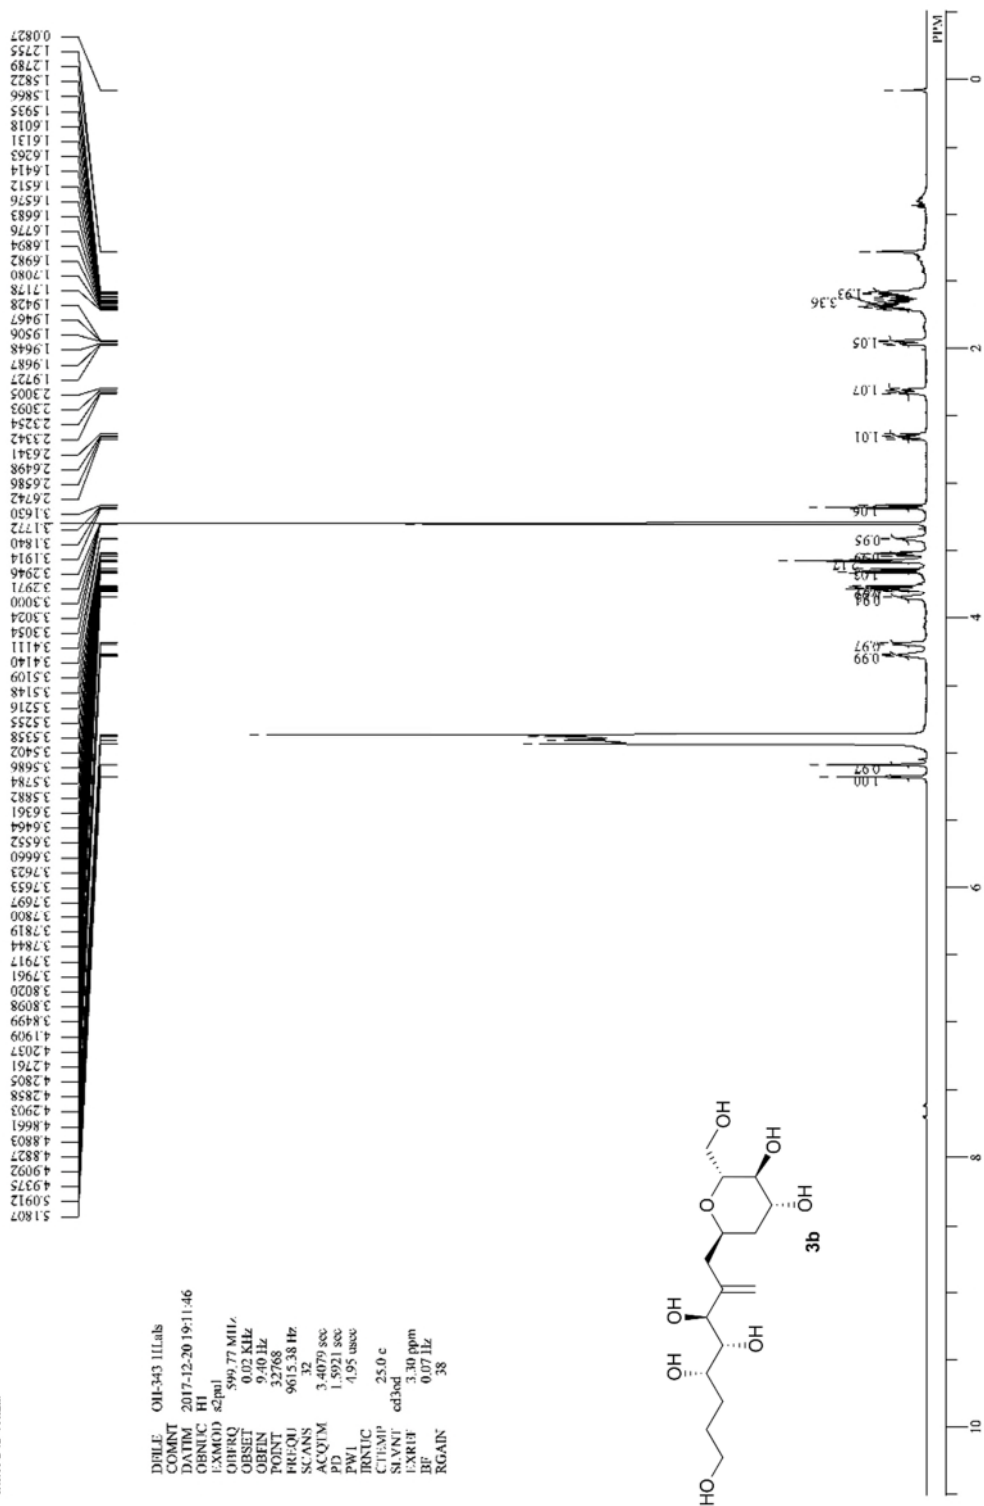

13001-343 13C.als

DIRILE OII-343 13C.als  
COMNT  
DATIM 2017-12-21 04:11:13  
OBJNIC C13  
EXMOD s2(m)  
OFRQ 150.82 MHz  
OBSF 7.97 kHz  
OBEN 8.20 Hz  
POINT 32768  
PREQU 37878.79 Hz  
SCANS 64  
ACQTM 0.8651 sec  
PD 2.1349 sec  
PWL 5.20 usoc  
RNUC  
CNAME 25.0 c  
SINUT ed3ad  
EXRTF 49.00 ppm  
RF 2.00 Hz  
RGAIN 60

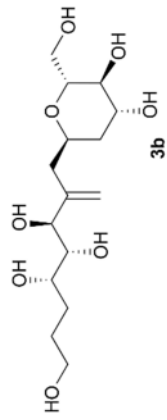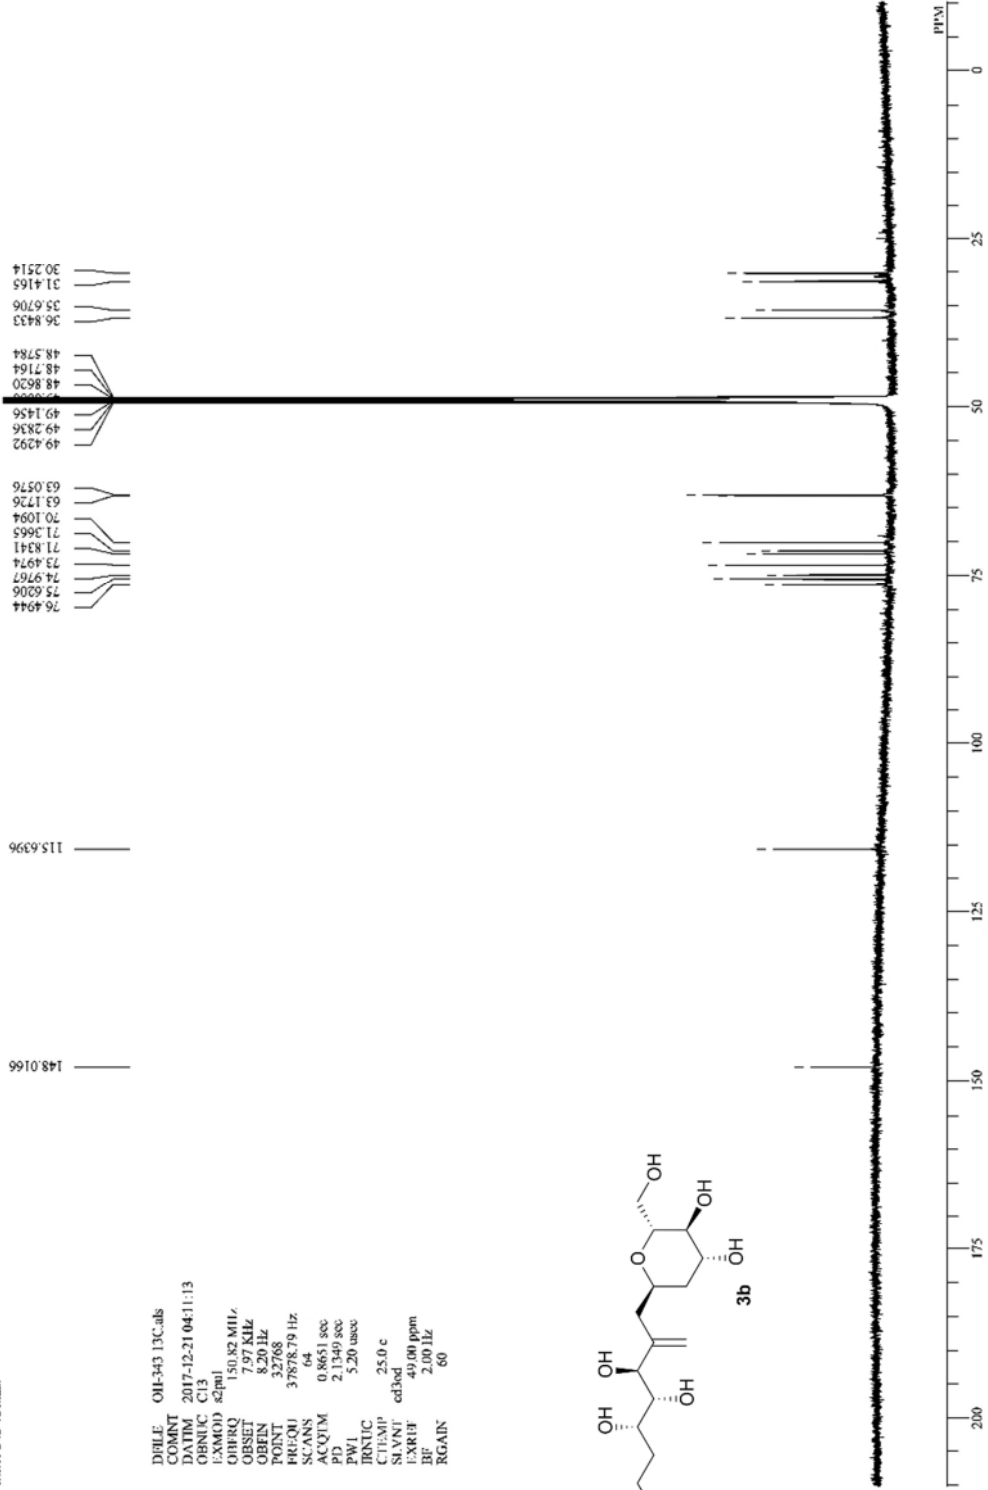

COSY

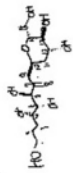

```

exp3 8057
=====
date_ 2017 11 28 11:14:58
solvent_ cd3od
sample_ 4094
=====
ACQUISITION
pr 5615.4 temp not used
at 6.136 gain 16
sp 4480 sfls 0
ss 32 sb -0.075
dl 1.000 sbw not used
nt 16 fn 4094
=====
2D ACQUISITION
ac 5615.4 sbw -0.075
sd 190 sbw not used
sz 0 proc1
=====
PRESENTATION
satmode n fcn1 DEPTAN
wt 864.1 n sp 2188.1
sc TRANSMITTE NI sp 2596.2
kErn 599.770 wfl 2596.2
totf 599.7 rfl 3190.4
tprc 59 rfp 3190.3
pr 9.909 fill 3186.2
=====
PARAMETERS
S1A18 0.001000 WC PLOT 198.0
EVALUO 1.000 RC
SPRSH 0.000500 WC2 198.0
dn DRUMFLAR C13 VS 282
cm non ch. cdc 4r 2
  
```

<sup>1</sup>H-<sup>1</sup>H COSY (600 MHz, CD<sub>3</sub>OD)

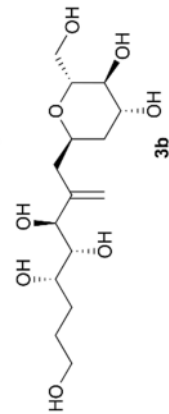

3b

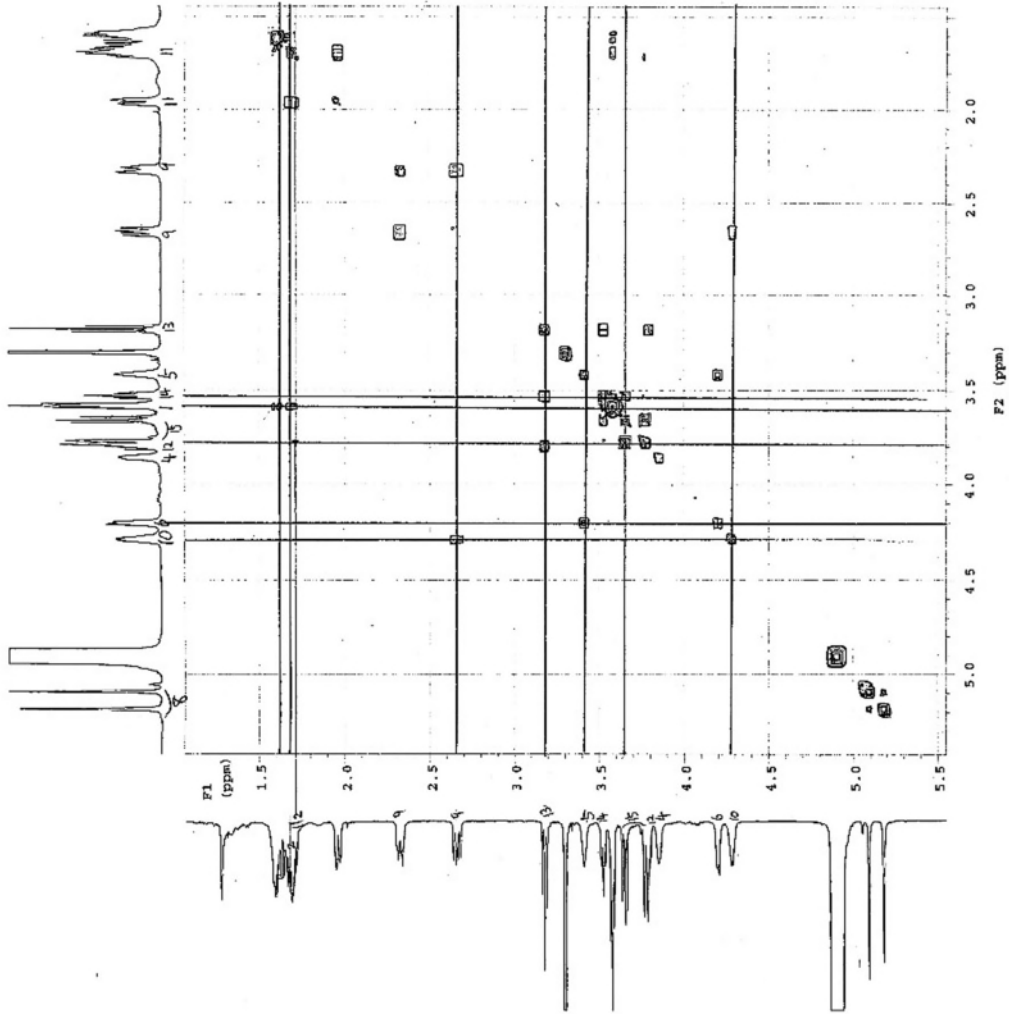

HMQC

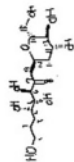

```

exp3 gsmqc
Date: Tue 20 2017 08:51:47 AM
Sample: 400
Acquisition: 9611.4
P1: 0.150
P2: 2.000
P3: 0.000
P4: 1.000
P5: 1.000
P6: 1.000
P7: 1.000
P8: 1.000
P9: 1.000
P10: 1.000
P11: 1.000
P12: 1.000
P13: 1.000
P14: 1.000
P15: 1.000
P16: 1.000
P17: 1.000
P18: 1.000
P19: 1.000
P20: 1.000
P21: 1.000
P22: 1.000
P23: 1.000
P24: 1.000
P25: 1.000
P26: 1.000
P27: 1.000
P28: 1.000
P29: 1.000
P30: 1.000
P31: 1.000
P32: 1.000
P33: 1.000
P34: 1.000
P35: 1.000
P36: 1.000
P37: 1.000
P38: 1.000
P39: 1.000
P40: 1.000
P41: 1.000
P42: 1.000
P43: 1.000
P44: 1.000
P45: 1.000
P46: 1.000
P47: 1.000
P48: 1.000
P49: 1.000
P50: 1.000
P51: 1.000
P52: 1.000
P53: 1.000
P54: 1.000
P55: 1.000
P56: 1.000
P57: 1.000
P58: 1.000
P59: 1.000
P60: 1.000
P61: 1.000
P62: 1.000
P63: 1.000
P64: 1.000
P65: 1.000
P66: 1.000
P67: 1.000
P68: 1.000
P69: 1.000
P70: 1.000
P71: 1.000
P72: 1.000
P73: 1.000
P74: 1.000
P75: 1.000
P76: 1.000
P77: 1.000
P78: 1.000
P79: 1.000
P80: 1.000
P81: 1.000
P82: 1.000
P83: 1.000
P84: 1.000
P85: 1.000
P86: 1.000
P87: 1.000
P88: 1.000
P89: 1.000
P90: 1.000
P91: 1.000
P92: 1.000
P93: 1.000
P94: 1.000
P95: 1.000
P96: 1.000
P97: 1.000
P98: 1.000
P99: 1.000
P100: 1.000
  
```

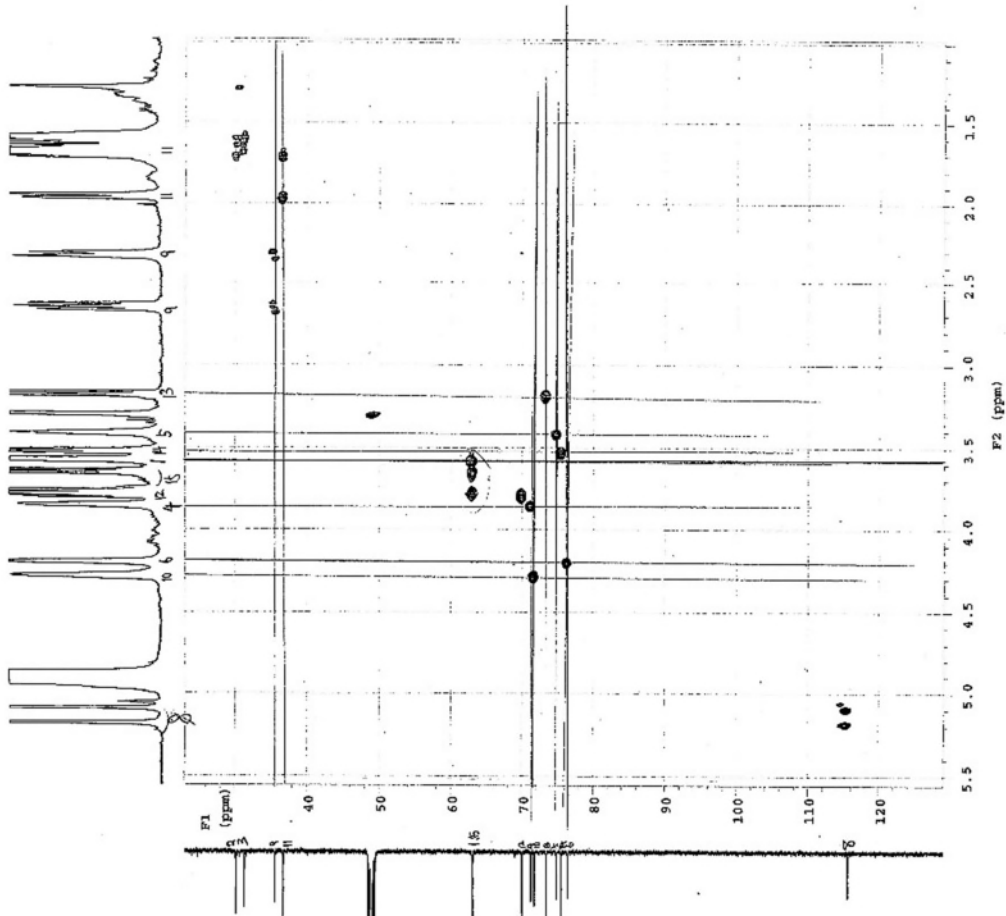

HMQC (600 MHz, CD<sub>3</sub>OD)

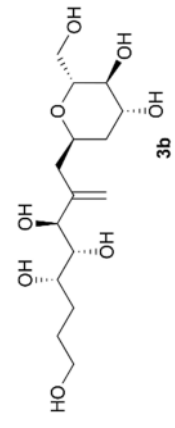



HMBC

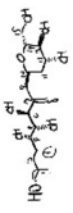

EXP3 080620

|                |               |          |          |
|----------------|---------------|----------|----------|
| DATE           | 20 2017       | TIME     | 08:15    |
| SOLVENT        | CDCl3         | CONC     | 100.0    |
| ACQUISITION    | 9615.4        | SCANS    | 4608     |
| NUC1           | 13C           | CPD      | 1        |
| NUC2           | 1H            | PCPD     | 1        |
| PPM1           | 0.150         | TEMP     | 300.2    |
| CPD            | 2884          | GCN      | 60       |
| AC             | 4000          | ORIGIN   | 0        |
| DC             | 1.00          | CHARGE   | 0        |
| RE             | 32            | FILE     | 0.001000 |
| 2D ACQUISITION | 9615.4        | SCANS    | 1500     |
| NUC1           | 13C           | CPD      | 1        |
| NUC2           | 1H            | PCPD     | 1        |
| PPM1           | 0.150         | TEMP     | 300.2    |
| CPD            | 2884          | GCN      | 60       |
| AC             | 4000          | ORIGIN   | 0        |
| DC             | 1.00          | CHARGE   | 0        |
| RE             | 32            | FILE     | 0.001000 |
| TRANSMITTER    | H1            | RECEIVER | H1       |
| PROBHD         | 5mm QNP 1H/13 |          |          |
| PROBHT         | 5mm QNP 1H/13 |          |          |
| PROBHD2        | 5mm QNP 1H/13 |          |          |
| PROBHT2        | 5mm QNP 1H/13 |          |          |
| PROBHD3        | 5mm QNP 1H/13 |          |          |
| PROBHT3        | 5mm QNP 1H/13 |          |          |

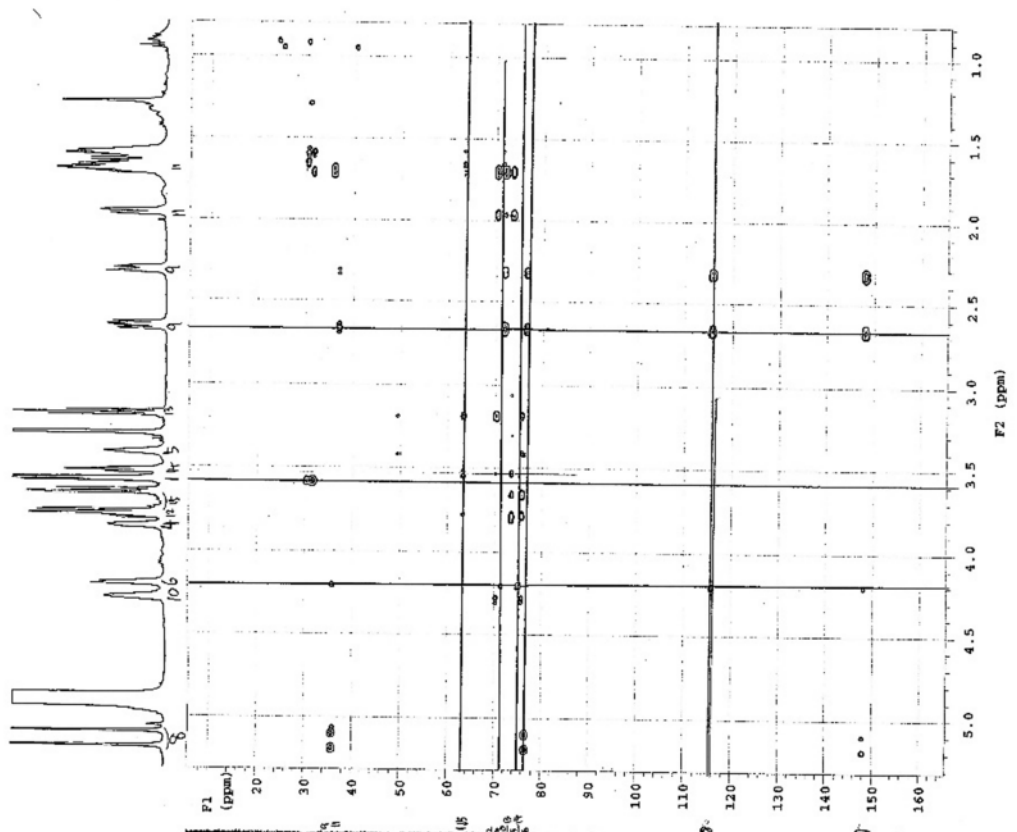

HMBC (600 MHz, CD<sub>3</sub>OD)

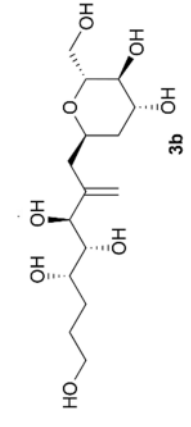

```

PFILE OH-438.als
CONV Mri Jul 23 20:20:44 2018
CIRCUIT 1
EXMOD NON
IRNUC 1H 399.65 MHz
PROBHD 5
PULPROG zgpg30
AQ 124.00 MHz
RG 10500.00 Hz
DELTA 7.26
PC 1.00
SFO 300.13 MHz
F2 300.13 MHz
NUC1 1H
NUC2 13C
SCANS 8
ACQTM 4.093 sec
RG 2.640 MHz
PWL 6.40 uSec
IRNUC 1H 27.6 c
CIRCUIT 1
SLANT CDCL3
EXREF 7.26 ppm
RGAIN 0.12 Hz
RGAIN
  
```

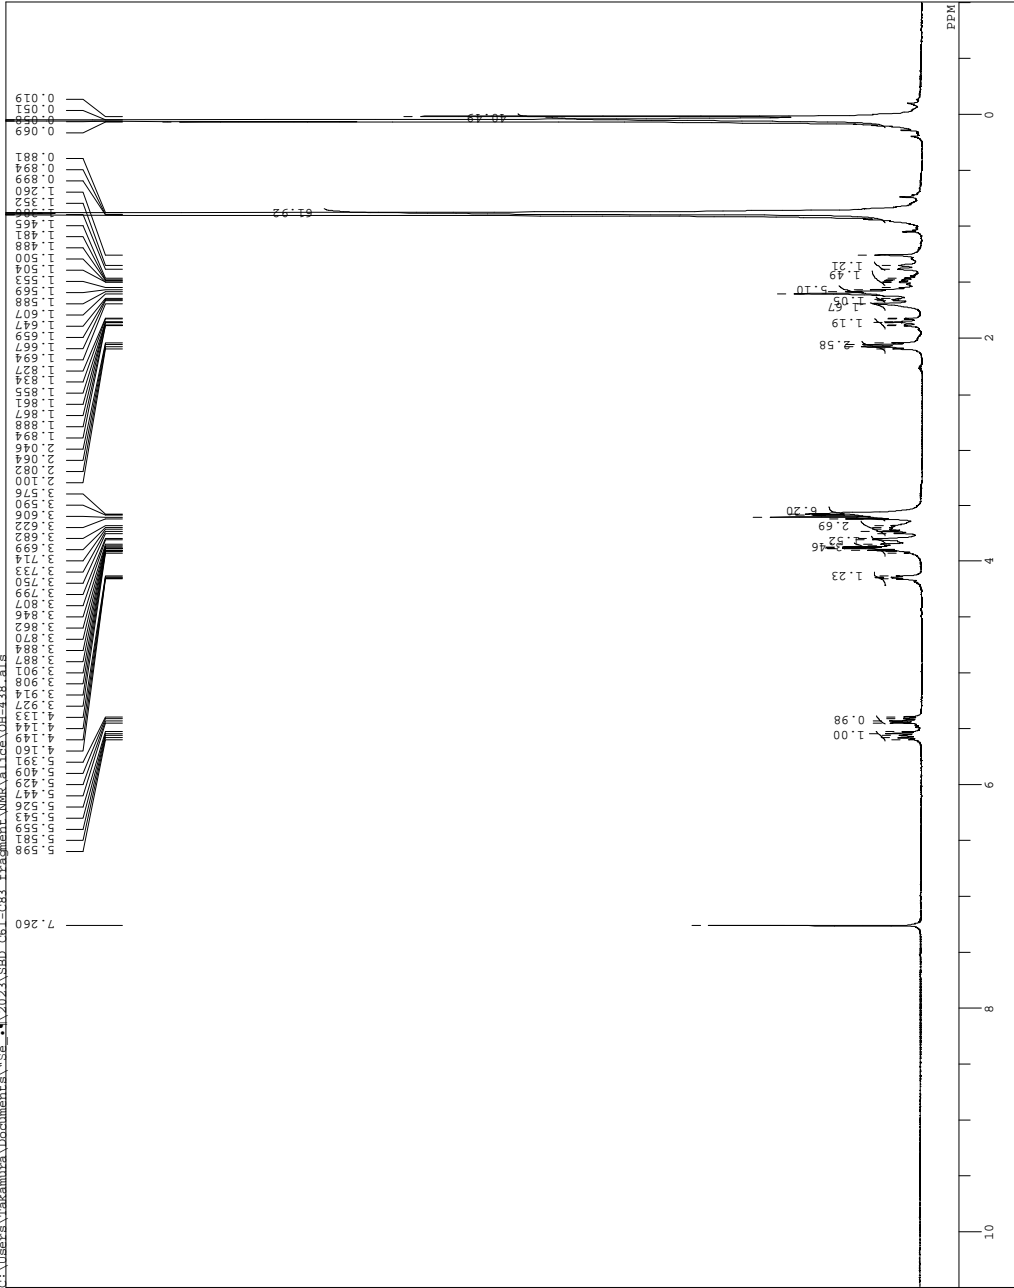



C:\Users\Takamura\Documents\4-5c-4\2023\SED\_C61-C63\_fragment\NMR\data\CH-443.a1s  
 DF L1: 0H-443.a1s  
 Date\_ Time: Thu Jul 26 16:12:27 2018  
 Operator: CH  
 EXMDC: NON  
 OBSF1: 399.55 MHz  
 OBSF2: 124.00 KHz  
 OBF1N: 10500.00 Hz  
 FREQ1: 79927.60 Hz  
 F2: 0.000000  
 ACQTM: 4.0993 sec  
 PULPROG: zgpg30  
 PULP1: 2.640 usec  
 PULPROG2: none  
 IRNUC1: 1H  
 IRNUC2: 13C  
 SLOWT: CDCL3  
 EXREF: 7.26 ppm  
 REF1: 0.12 Hz  
 REF2: none  
 REF3: none

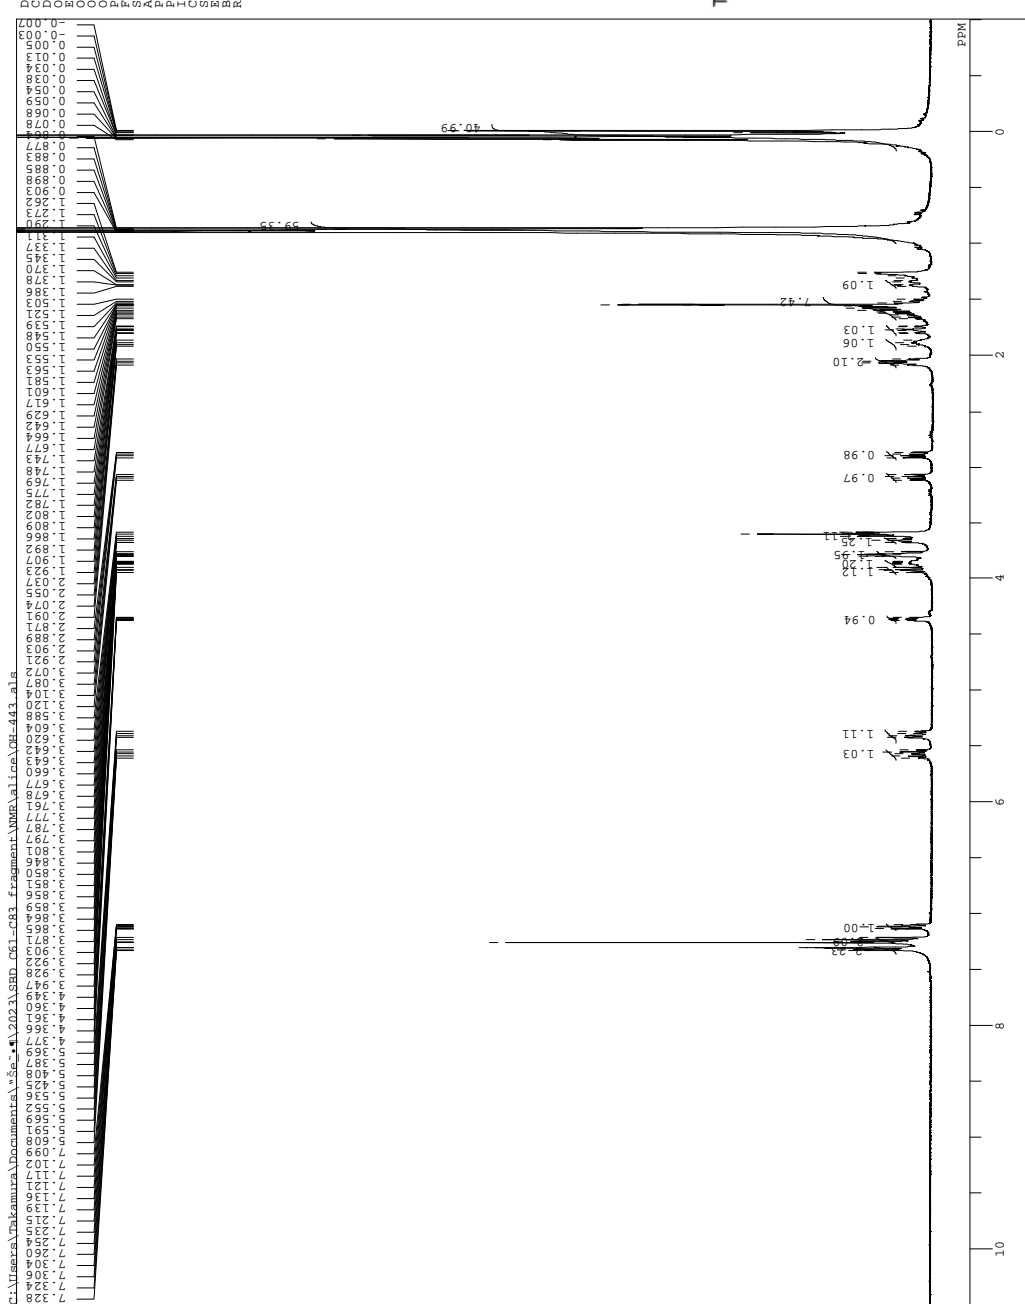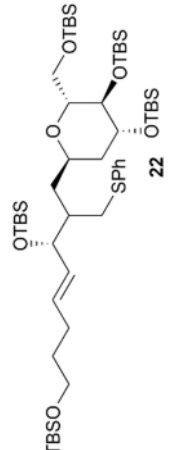

C:\Users\Takamura\Documents\3e-4\2023\SED\_C61-CB3\_fragment\_NMR\alice\OH-443\_13C\_als

DFILE OH-443\_13C\_als  
 DATE\_ TIME Thu Jul 26 17:36:03 2018  
 CONV 13C  
 EXMOD BCM  
 IRNUC 100.40 MHz  
 OBSFQ 125.00 KHz  
 OBSF1 10500.00 Hz  
 PRPT 27173.90 Hz  
 SCANS 1560  
 ACQTM 1.20000 sec  
 PULP 1.60000 usec  
 PW1  
 IRNUC 1H 29.3 c  
 CH1P CDCL3  
 SLWT EXREF 77.00 PPM  
 EXREF 2.00 Hz  
 RGAIN

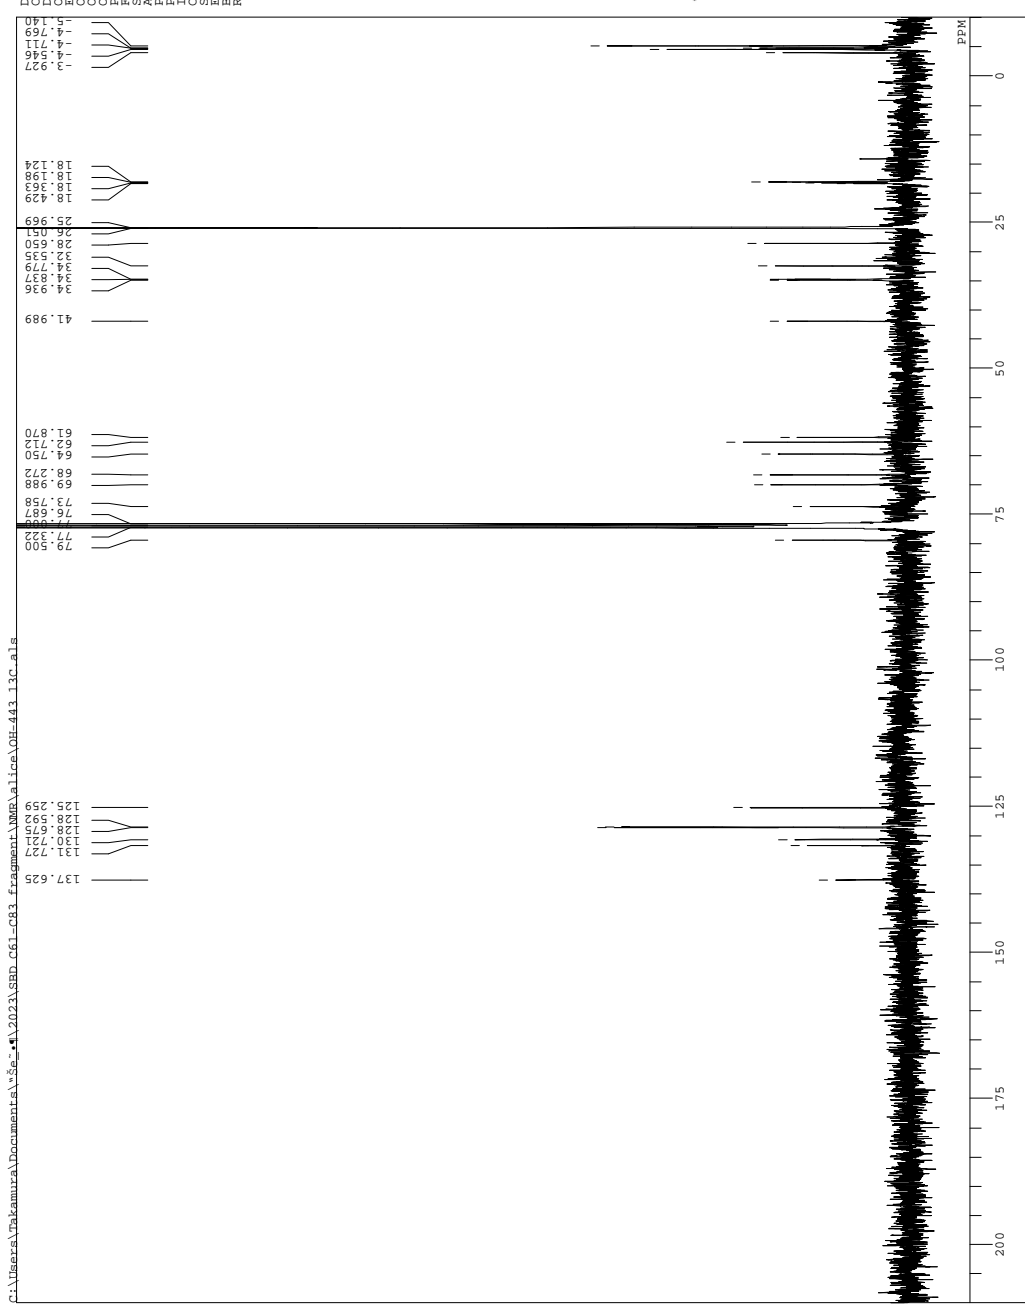

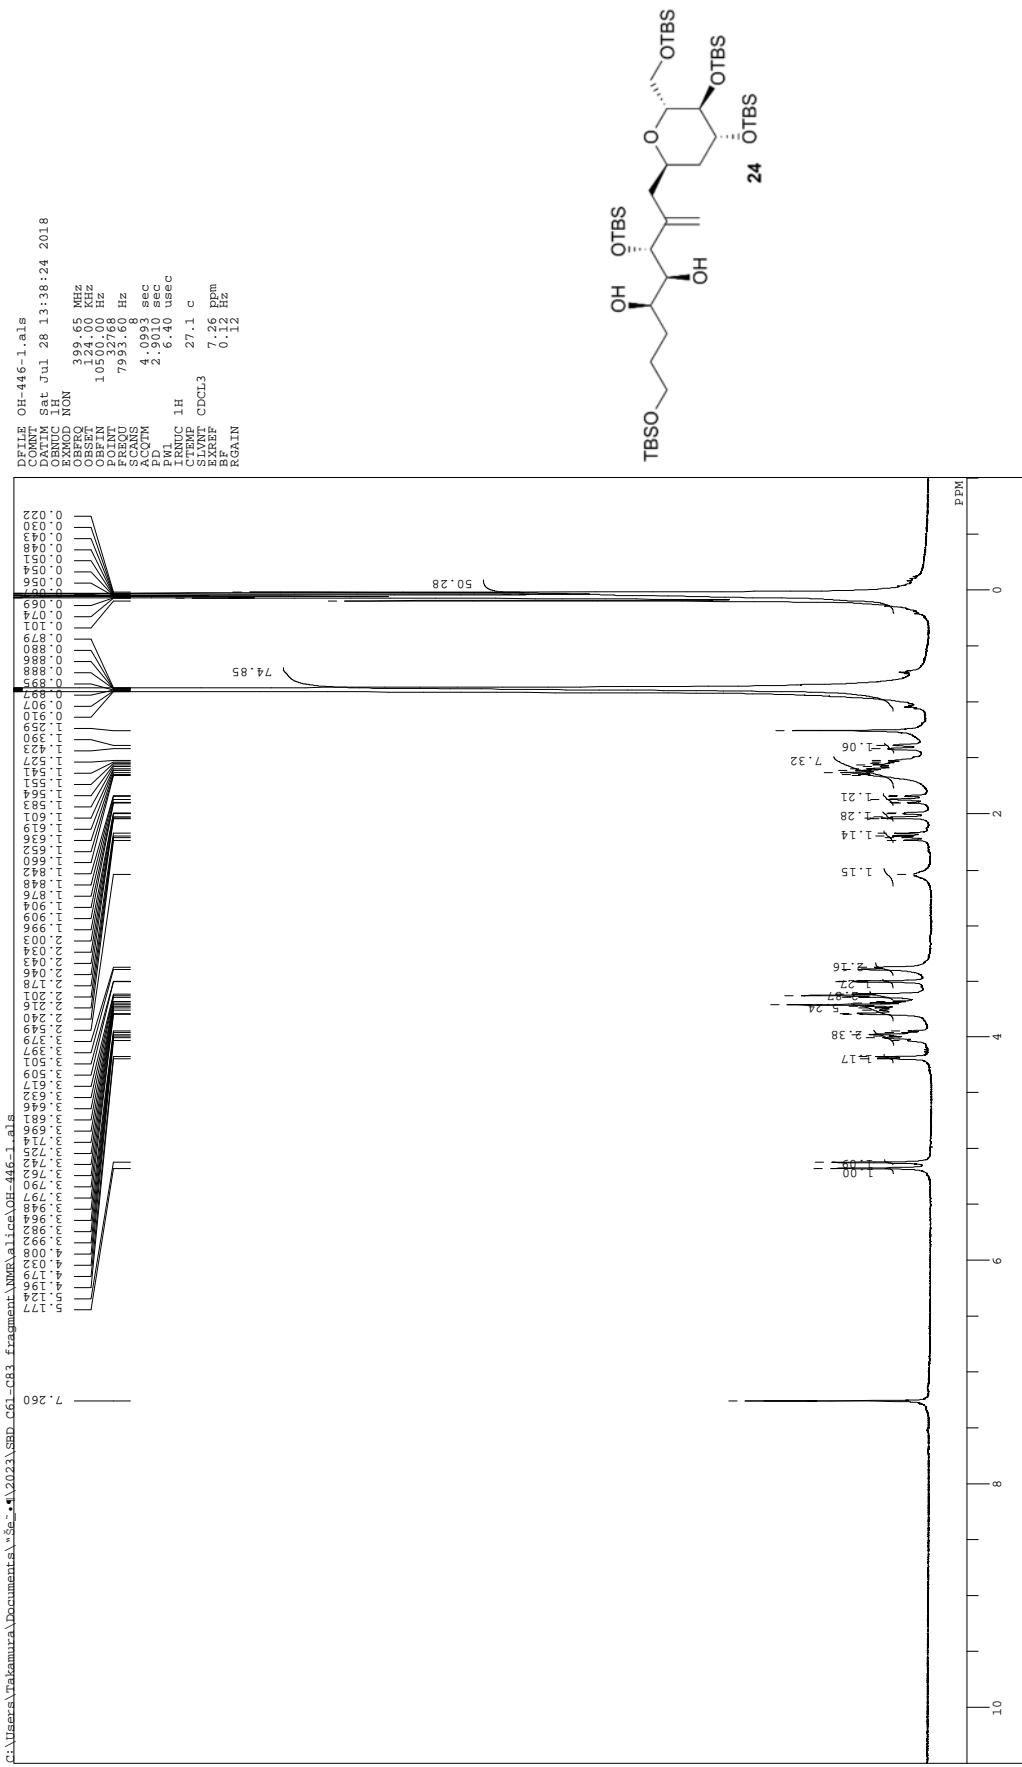

DP46 OH-446-1 13C-als  
 DATE\_ Sat Jul 28 14:35:39 2018  
 DATA 13C  
 INSTRUM NUC1  
 PROCNO 1  
 F2 F4  
 CMPTED 1  
 OBSERV 100.40 MHz  
 OBSF2 125.00 KHz  
 OBSF1 10650.00 Hz  
 FREQ 27173.99 Hz  
 PROC 744  
 SCANS 1  
 P1 1.790 sec  
 PD 1.680 usec  
 PWD 29.1 C  
 CRUC 1H  
 CRUC 1H  
 ACQ 1H  
 SLSVNT CDCL3 77.00 PPM  
 EXREF 2.24 Hz  
 RGAIN

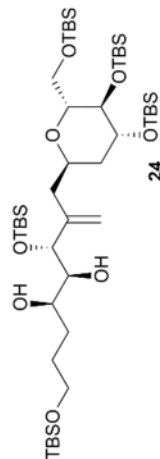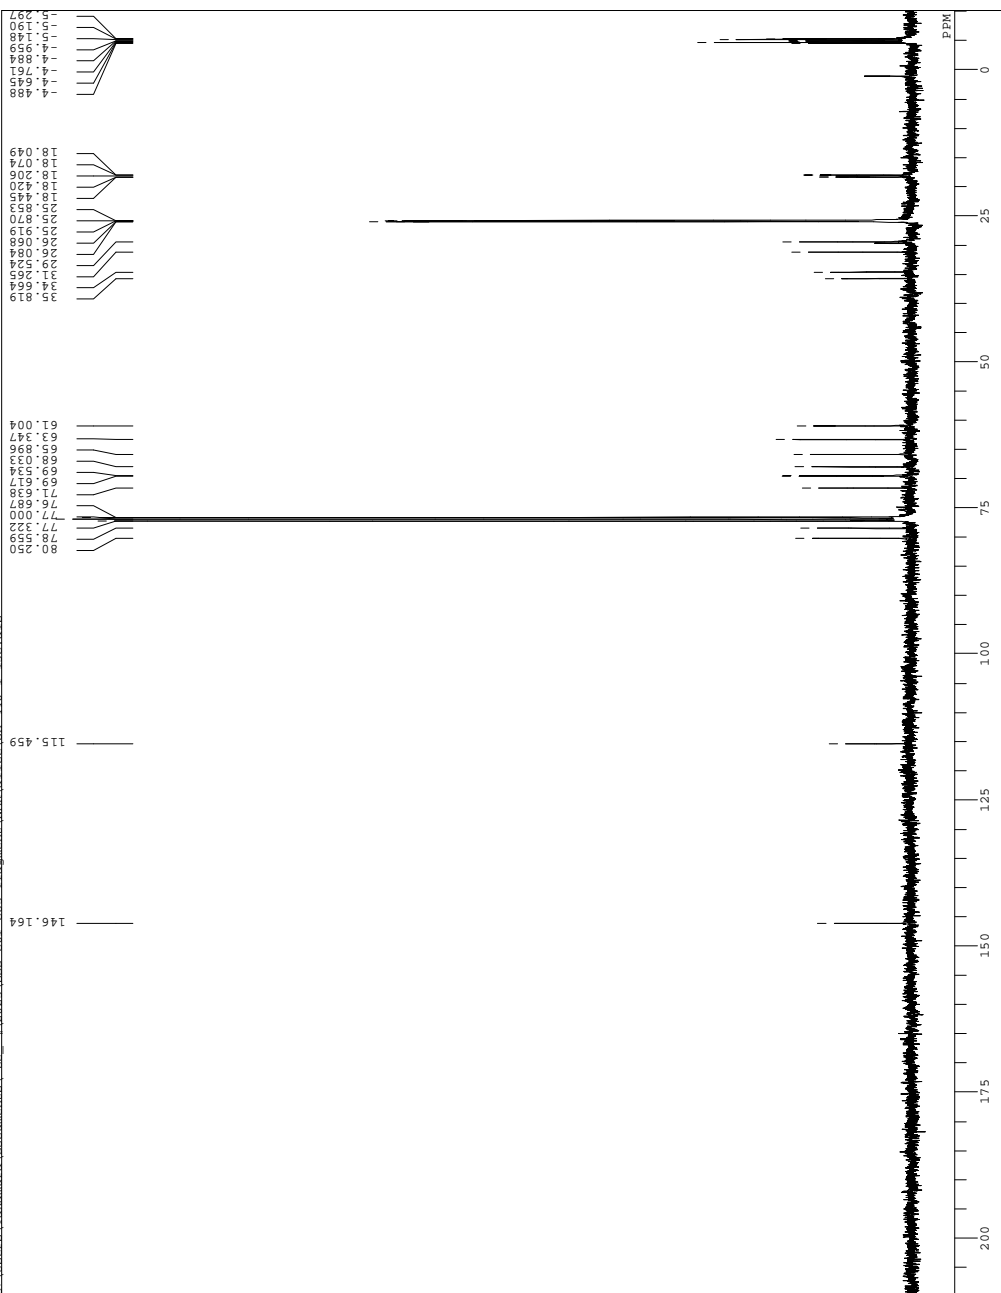

C:\Users\takamura\Documents\Se...\*\2023\SD\_C61-C83\_Fragment\NMR\Alice\OH-458.a1s

DTF: OH-458.a1s  
COMT:   
DATE: Thu Aug 23 19:15:52 2018  
NAME:   
PROC:   
PULSE:   
PROG:   
RETO:   
SOLV:   
NAME:   
DATE:   
TIME:   
FREQ: 399.65 MHz  
PULP: 124.00 kHz  
PULW: 10.000000 Hz  
PULPR: 37.68 Hz  
FREQ: 7993.60 Hz  
SOLV:   
ACQ: 4.0983 sec  
PROC: 2.9010 sec  
PULP: 6.40 usec  
PULW: 1H  
PULPR: 27.7 c  
SOLV: CDCL3  
SOLV: 7.56 ppm  
REF: 0.12 Hz  
RGAIN: 0.19

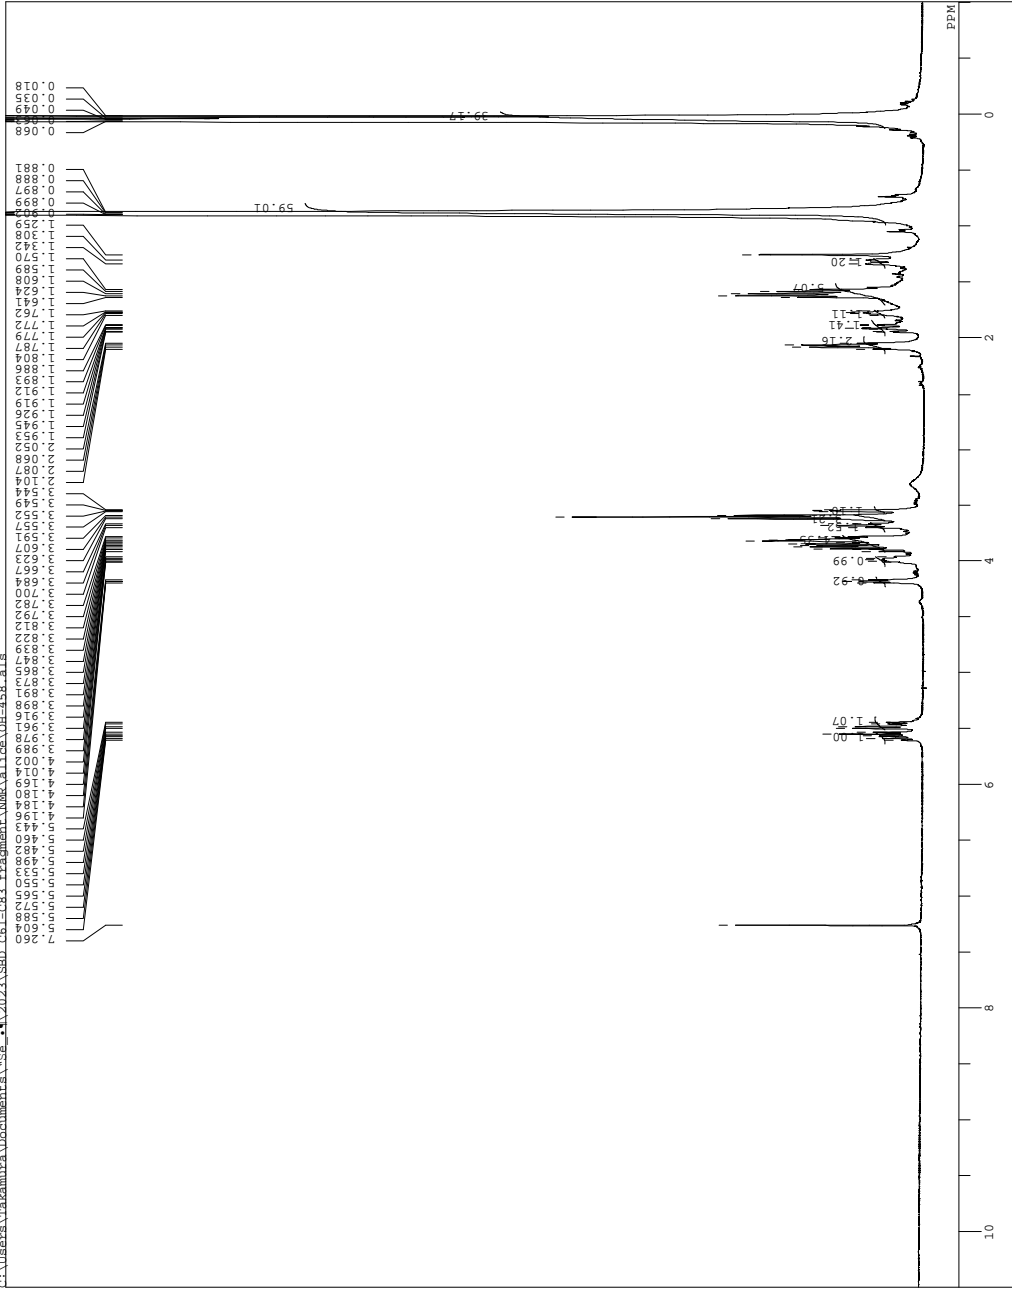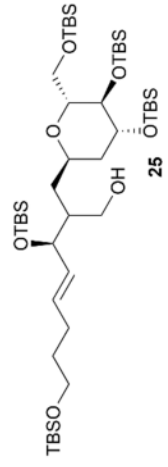



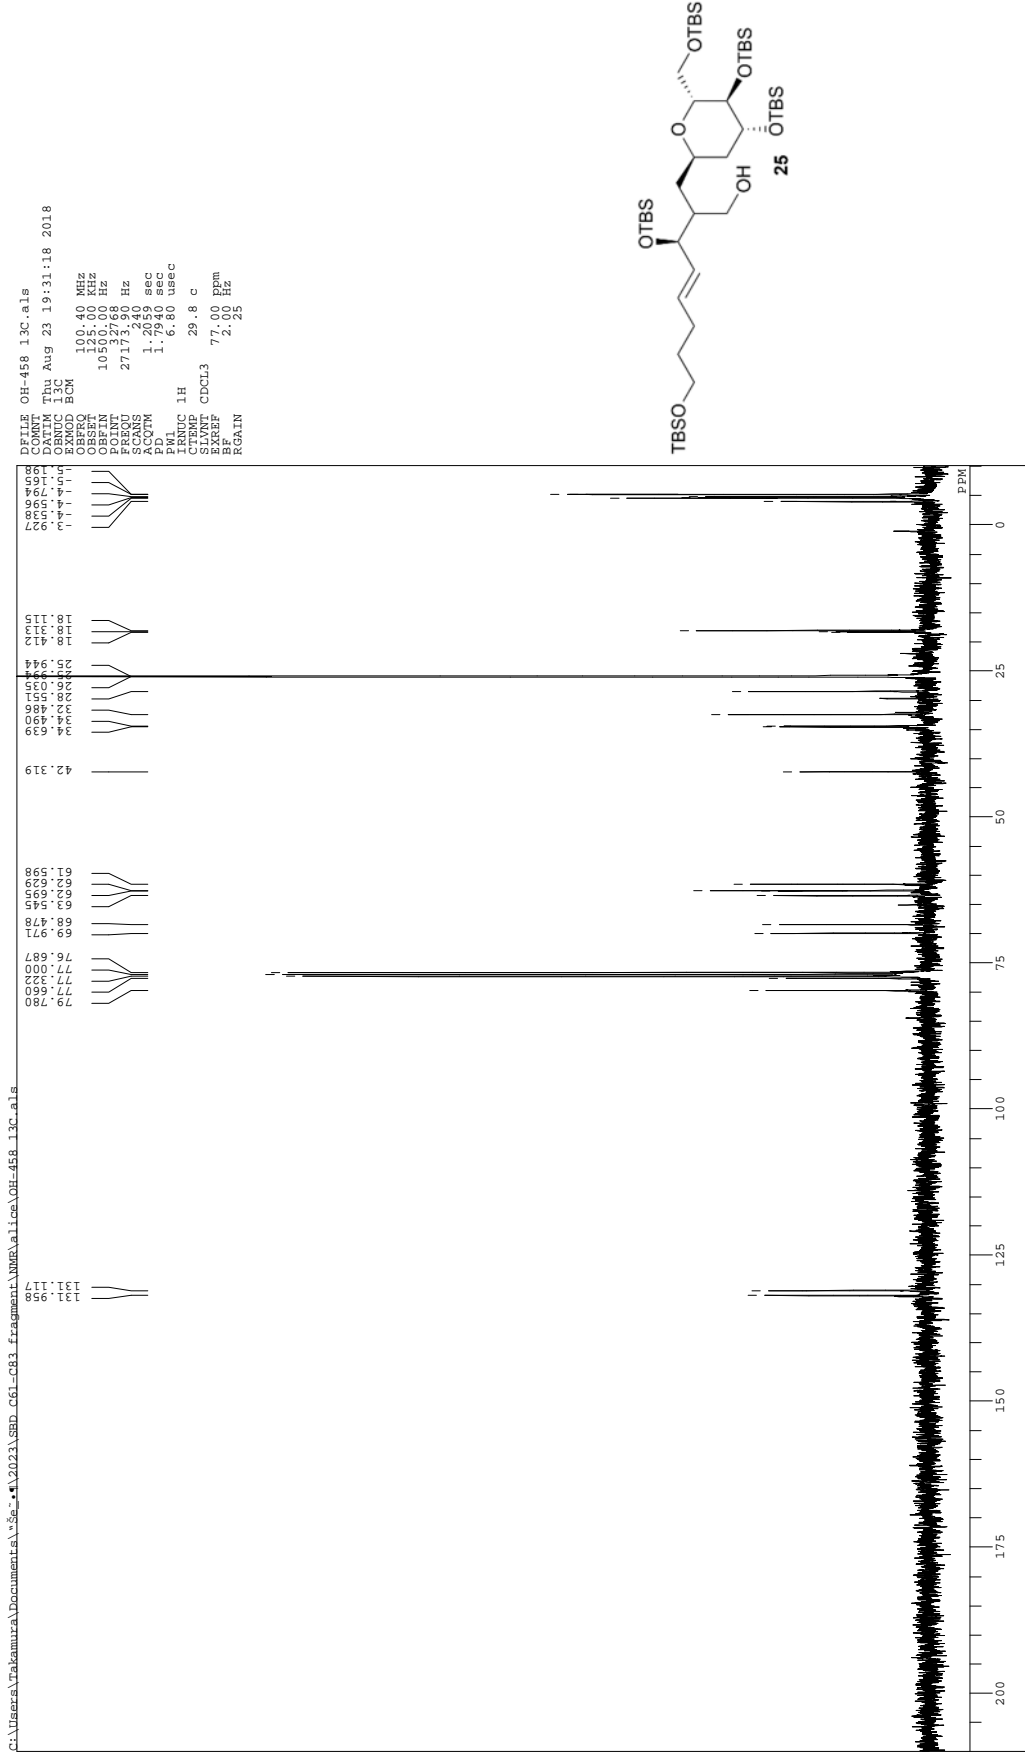

C:\Users\Takamura\Documents\Se...1\2021\SHD\_061-C81-Fragment\NMR\alica\OH-461\_als  
 FILE OH-461\_als  
 DATE Mon Aug 27 16:22:39 2018  
 INSTR LH  
 ORBITON  
 PULPROG zgpg30  
 PROCNO 1  
 F2 399.65 MHz  
 F1 124.00 KHz  
 OFFSET 10500.00 Hz  
 AQC 1.00000000  
 FREQ0 79931.00 Hz  
 FREQ1 79931.00 Hz  
 F2OFF 0.00000000  
 SCANS 8  
 DS 4.00000000  
 P1 2.00000000 sec  
 P2 6.40000000 usec  
 P3 0.00000000  
 P4 0.00000000  
 P5 0.00000000  
 P6 0.00000000  
 P7 0.00000000  
 P8 0.00000000  
 P9 0.00000000  
 P10 0.00000000  
 P11 0.00000000  
 IRNUC LH 27.9 C  
 SFO 124.00000000 MHz  
 SLVNT CDCL3  
 EXREF 7.26 ppm  
 RGAIN 0.10 Hz

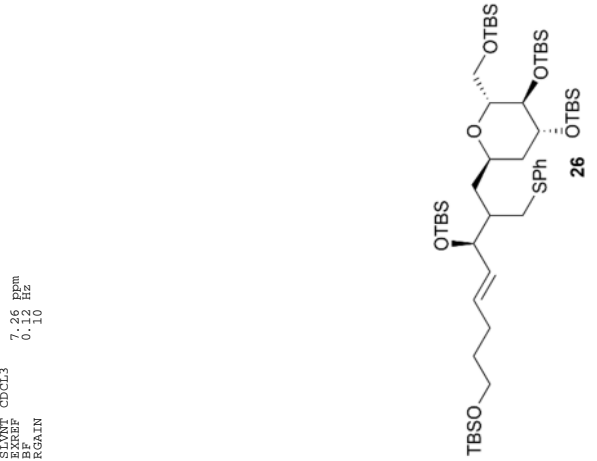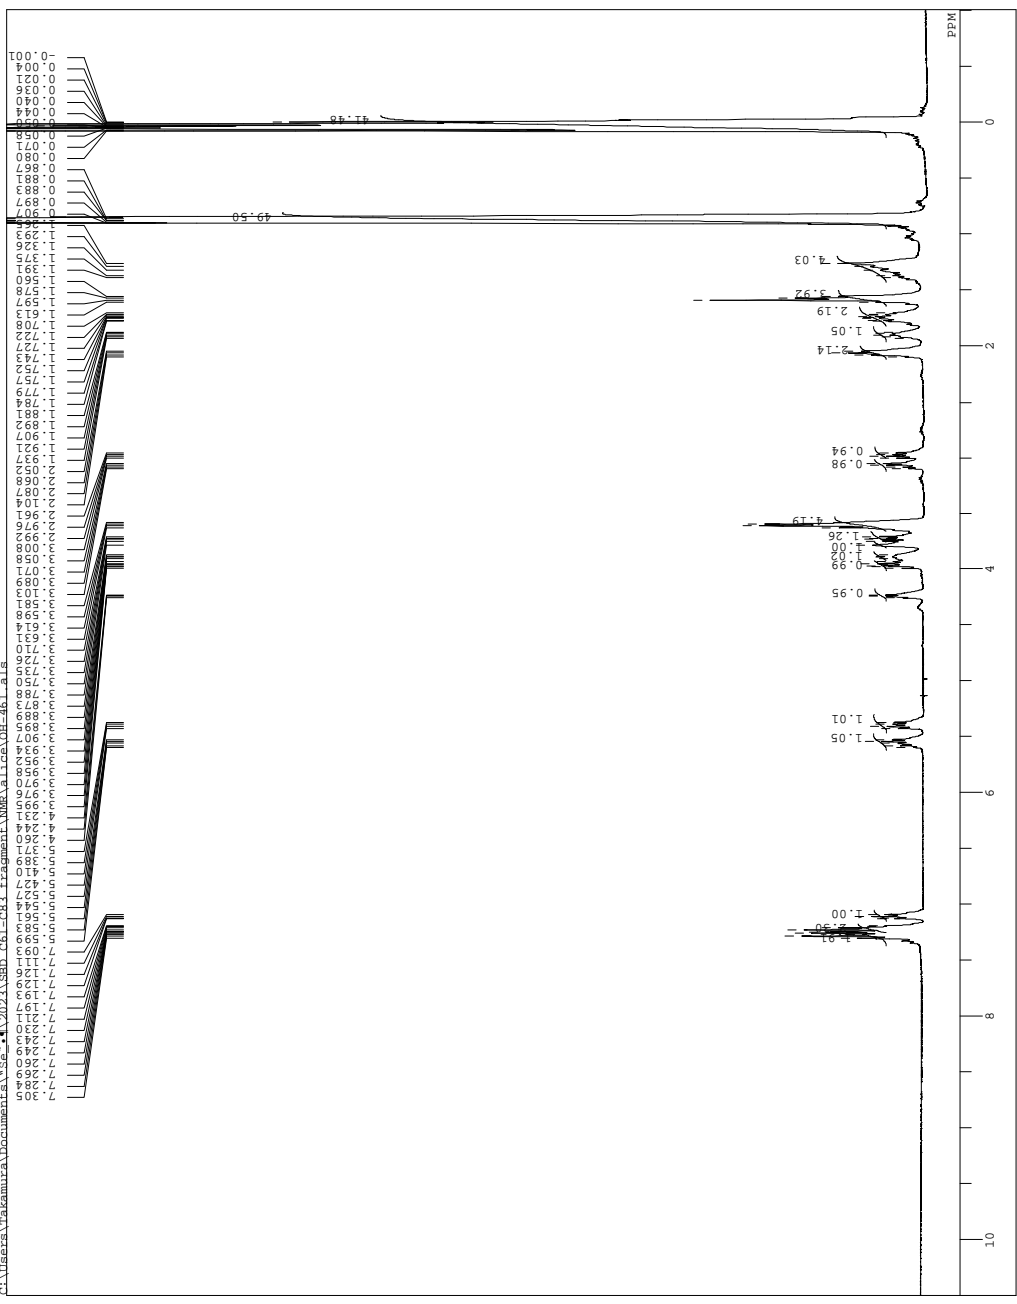

C:\Users\takamura\Documents\Seq\_4\2023\SD\_C61-CH3\_fragment\NMR\alice\OH-461\_13C\_als

F1 F2 OH-461\_13C\_als  
 COM1  
 DATE\_ Mon Aug 27 17:06:11 2018  
 GENUC 13C  
 ECH  
 OBSFRO 100.40 MHz  
 OBSF2 125.00 KHz  
 PULPROG zgpg30  
 FREQ1 27173.30 Hz  
 SCANS 1.7060 sec  
 PD 1.7940 sec  
 P1 6.80 usec  
 P2 29.4 c  
 CTEMS 1H  
 SLVNT CDCL3  
 SLSF 77.00 ppm  
 HXREF  
 RGAIN 2.25

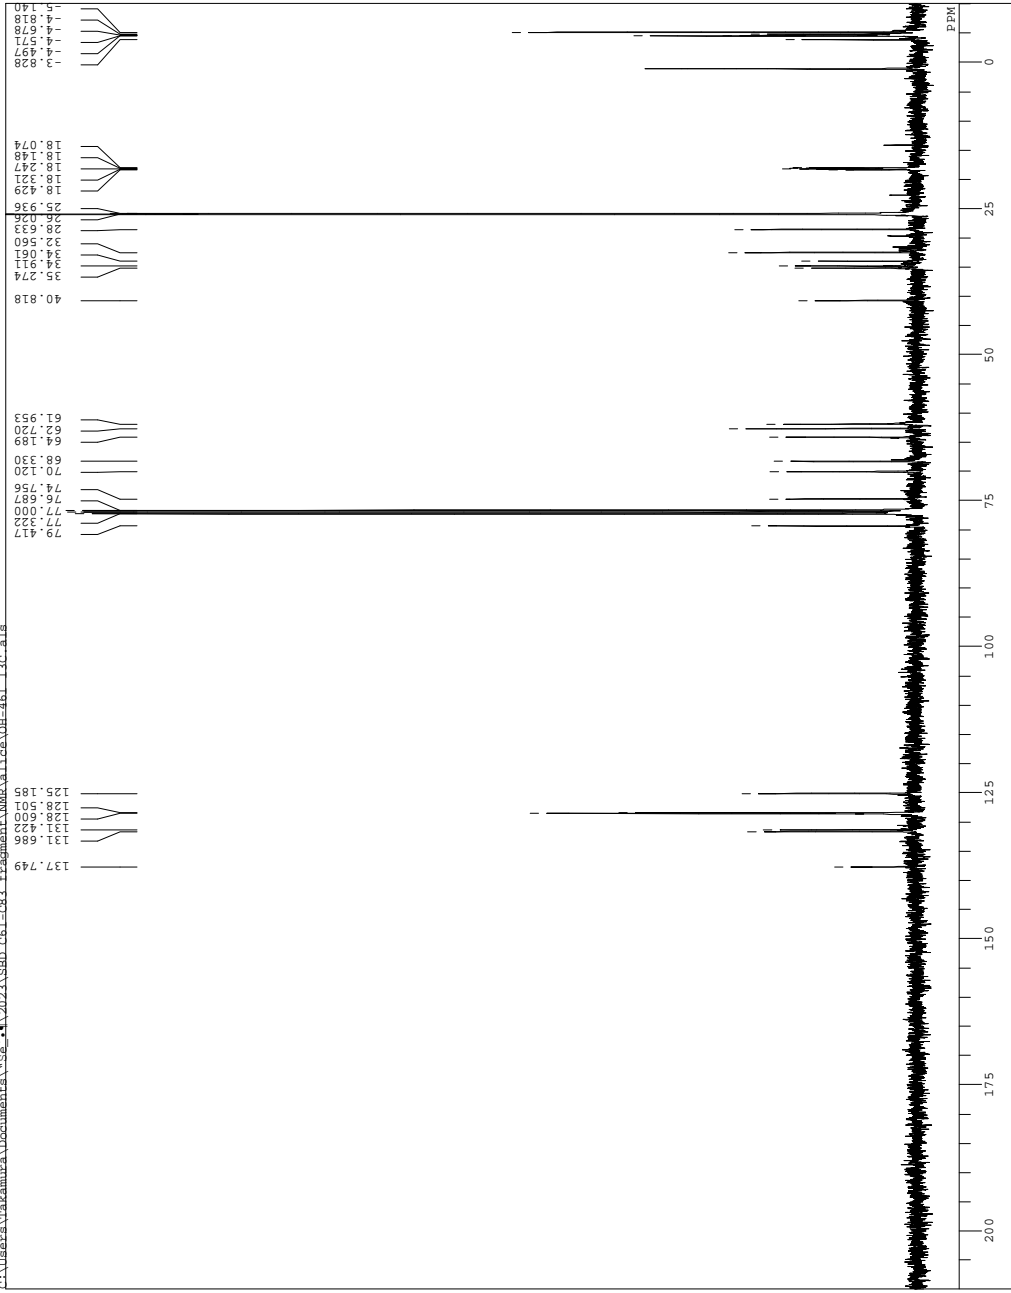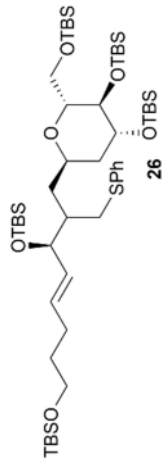

```

NAME      OH-464-1.als
PRFILE   OH-464-1.als
DATE      Wed Aug 29 13:45:28 2018
INSTRUM  spect
PROBHD   5mm
PULPROG  zgpg30
SFO      399.65 MHz
AQ       124.00 kHz
RG       10500.00 Hz
WDW      EM
SSB      0
GB       0
EC       0
PRF      79931.60 Hz
SCANS    4
DS       8
AQTM     2.9013 sec
RGTM     6.40 usec
FWD      1
IRFREQ   27.9 C
SOLVENT  CDCL3
SOLVENT  7.26 ppm
EXREF    0.11 Hz
RGAIN    0.11
  
```

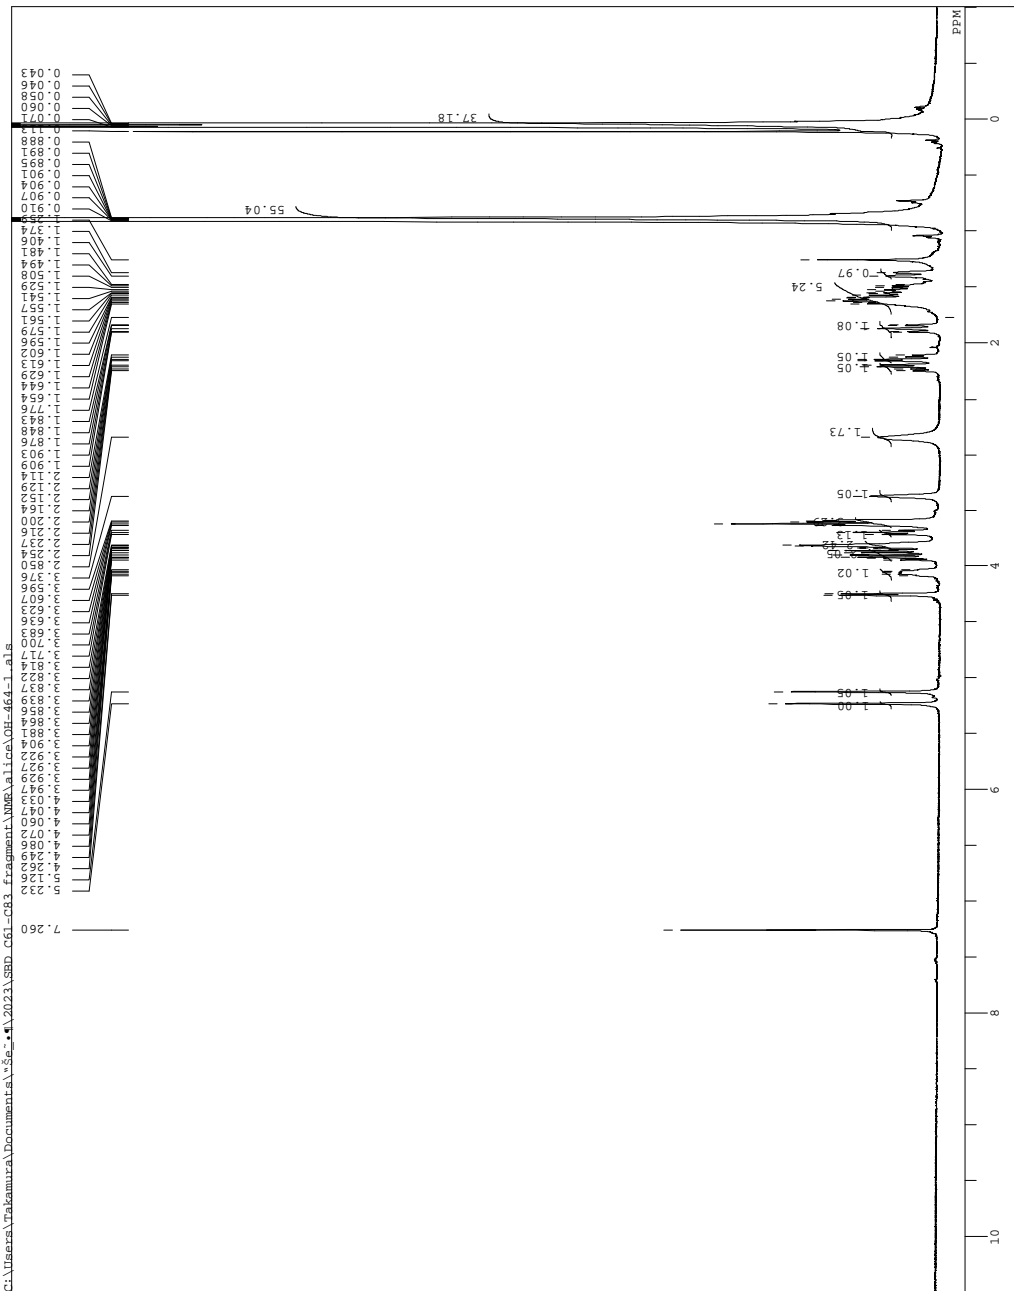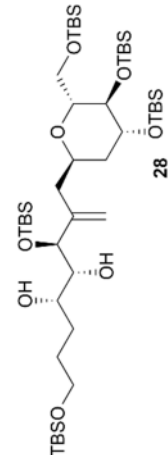

C:\Users\takamura\Documents\5e\_4\2021\5BD\_C61-C83\_fragment\NMR\alice\OH-464-1\_13C\_alis

DP11E OH-464-1\_13C\_alis  
 DATE\_ Wed Aug 29 14:09:02 2018  
 DATIM 13C  
 P1 13C  
 PROCN ECM  
 OBSO 100.40 MHz  
 OBSF1 125.00 KHz  
 OBSF2 10500.00 Hz  
 FREQ0 27173.96 Hz  
 SCANS 380  
 ACQ01 1.7940 sec  
 PD01M 1.6780 usec  
 PUL 1H  
 PRNUC 1H 29.7 C  
 SLVNT CDCL3  
 EXREF 77.00 FPM  
 RGAIN 2.24

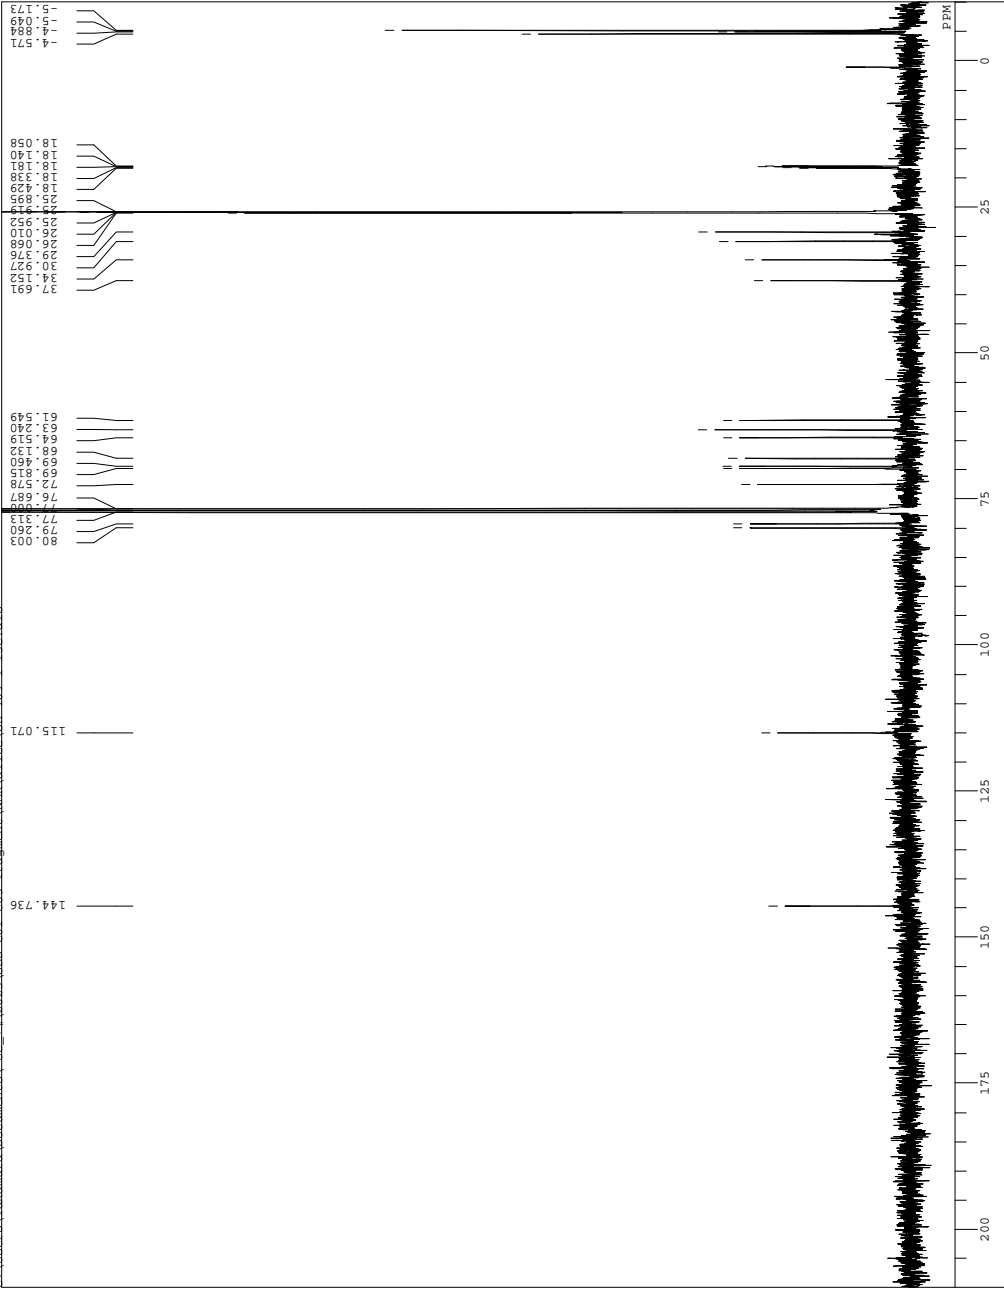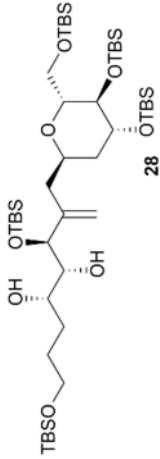

C:\Users\Trakamusa\Documents\Se...2023\8SD\_661\_C83\_Fragment\NMR\data\TO-441\_als  
 FILE TO-441\_als  
 Date Thu Nov 22 16:45:30 2018  
 DTIME 1.19  
 ORBIT 1H  
 PULPROG zgpg30  
 PROCNO 1  
 F2 399.65 MHz  
 F1 124.00 KHz  
 OBF1 10500.00 Hz  
 OBF2 7953.60 Hz  
 FREQ 4.0888  
 SCANS 8  
 PC 2.9030 sec  
 PD 6.40 usec  
 PM 1.1H  
 IPRMC 25.2 C  
 SOLVENT CDCL3  
 EXREF 7.26 PPM  
 EXRES 0.13 Hz  
 RGAIN

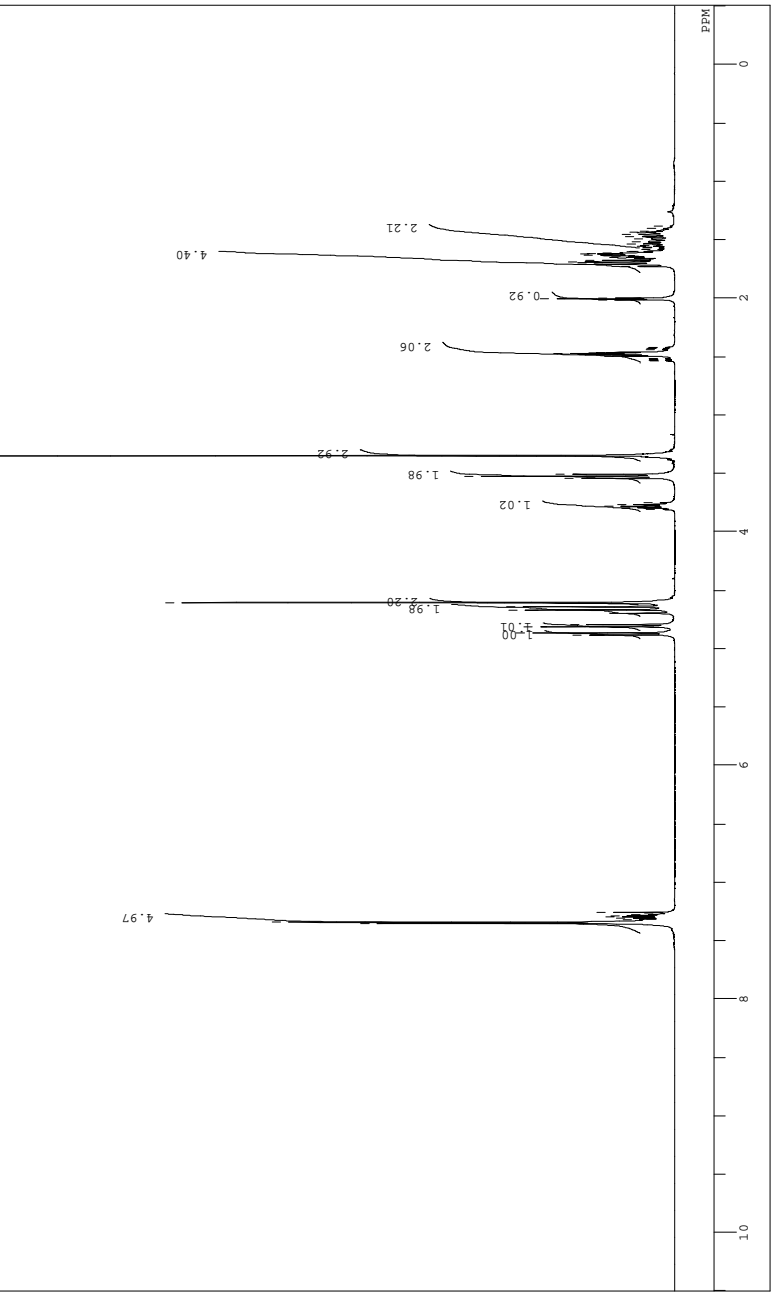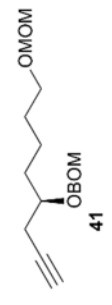

C:\Users\Takanawa\Documents\Se\_4\2021\SSB\_G61-G83\_Fragment\NMR\alicat\TO-441\_13C\_als  
 DFIL: TO-441\_13C\_als  
 COMPT Thu Nov 22 17:03:04 2018  
 CONV 13  
 ORNTC BCM  
 EXMOD BCM  
 ORSC 130.40 MHz  
 OBSOL 135.00 MHz  
 OFIN 10500.00 Hz  
 POINT 27173268  
 SCANS 840 Hz  
 ACQTM 1.2059 sec  
 PUL 1.6800 usec  
 P1 27.30 usec  
 IRNUC 1H  
 STNUC 13C  
 STINT CDCL3 27.3 c  
 EXREF 77.00 ppm  
 BF 2.00 Hz  
 RGAIN 24

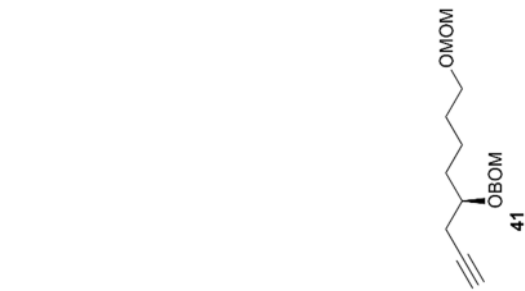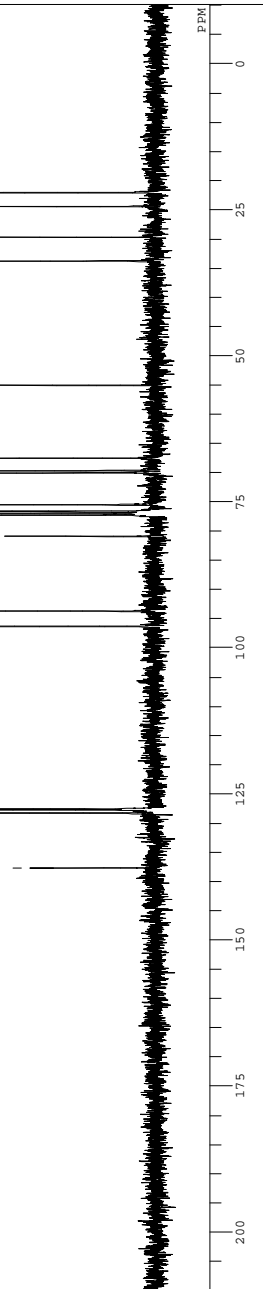

DFILE TO-431-1.als  
 CONVY Thu Nov 15 16:54:05 2018  
 OBNUC 1H  
 EXMOD NON  
 OBSFO 399.65 MHz  
 OBSFQ 124.00 MHz  
 OBFIN 10500.00 Hz  
 PRNUC 1H  
 PRNUF 79337.68 Hz  
 SCANS 8  
 ACQTM 4.093 sec  
 PRG 2.640 usec  
 PW1  
 IRNUC 1H 25.3 c  
 SLMNT CDCL3 7.26 ppm  
 EXREF 0.12 Hz  
 RGAIN

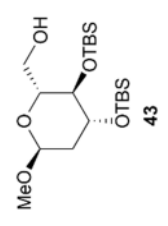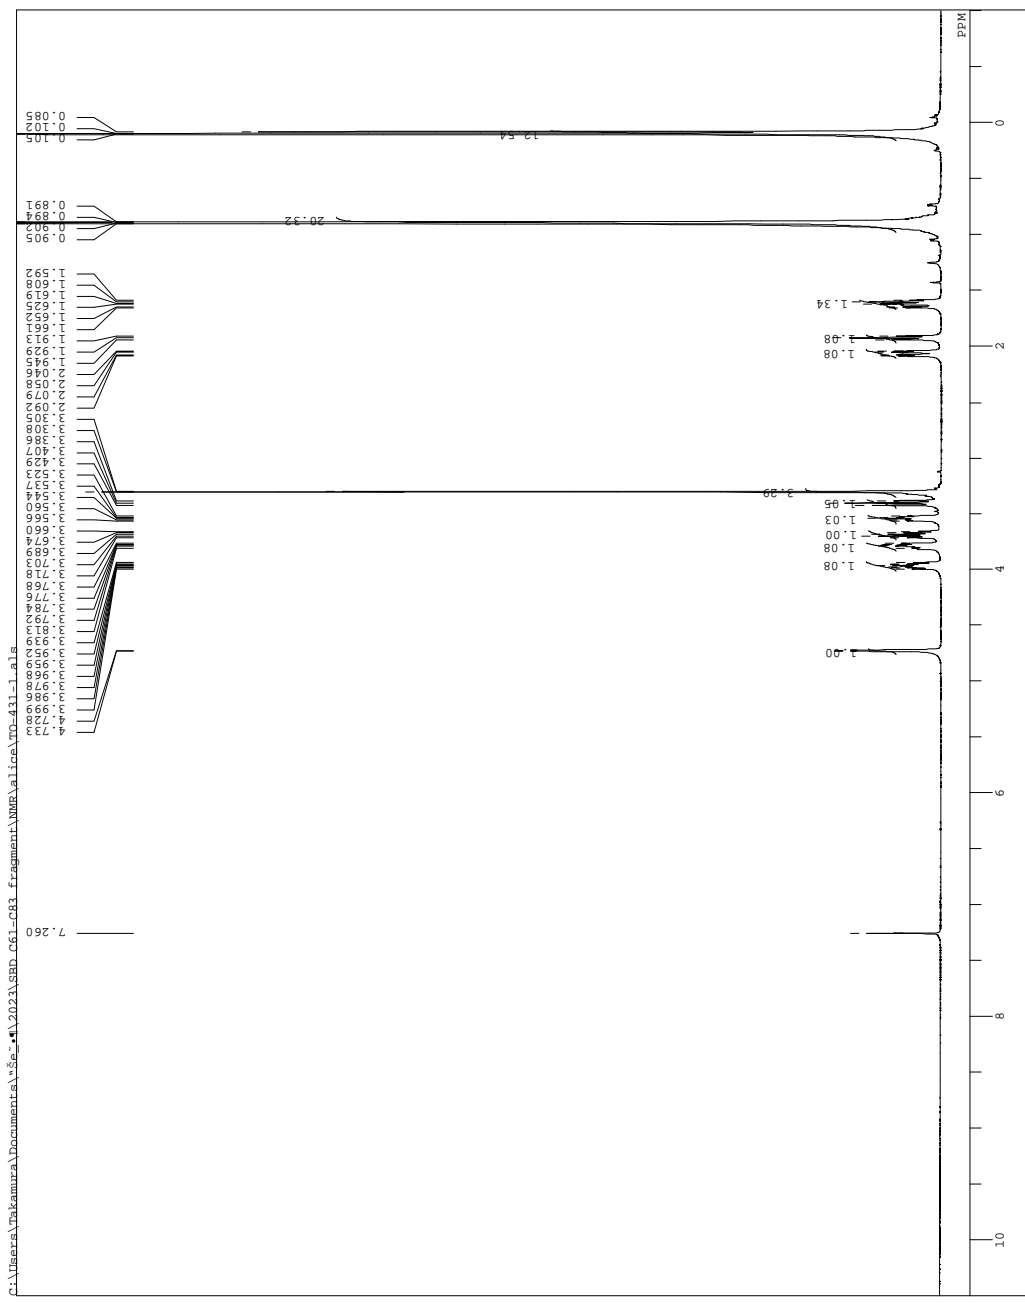



PFI1 70-431-1 13C.sls  
 COMPT Thu Nov 15 17:14:32 2018  
 DATEM 13C  
 DEMOC 13C  
 SNAME B3C  
 OBFRQ 100.40 MHz  
 OBSFT 125.00 KHz  
 OBSRG 100.00 Hz  
 POINT 32768  
 PRGQU 27173.90 Hz  
 ACQNS 1.205 sec  
 PDGTM 1.7940 sec  
 PMA 6.80 usec  
 PMA1 1H  
 CTMP 27.3 c  
 SLVNT CDCL3 77.00 ppm  
 REF 2.00 Hz  
 RGAIN 2.25

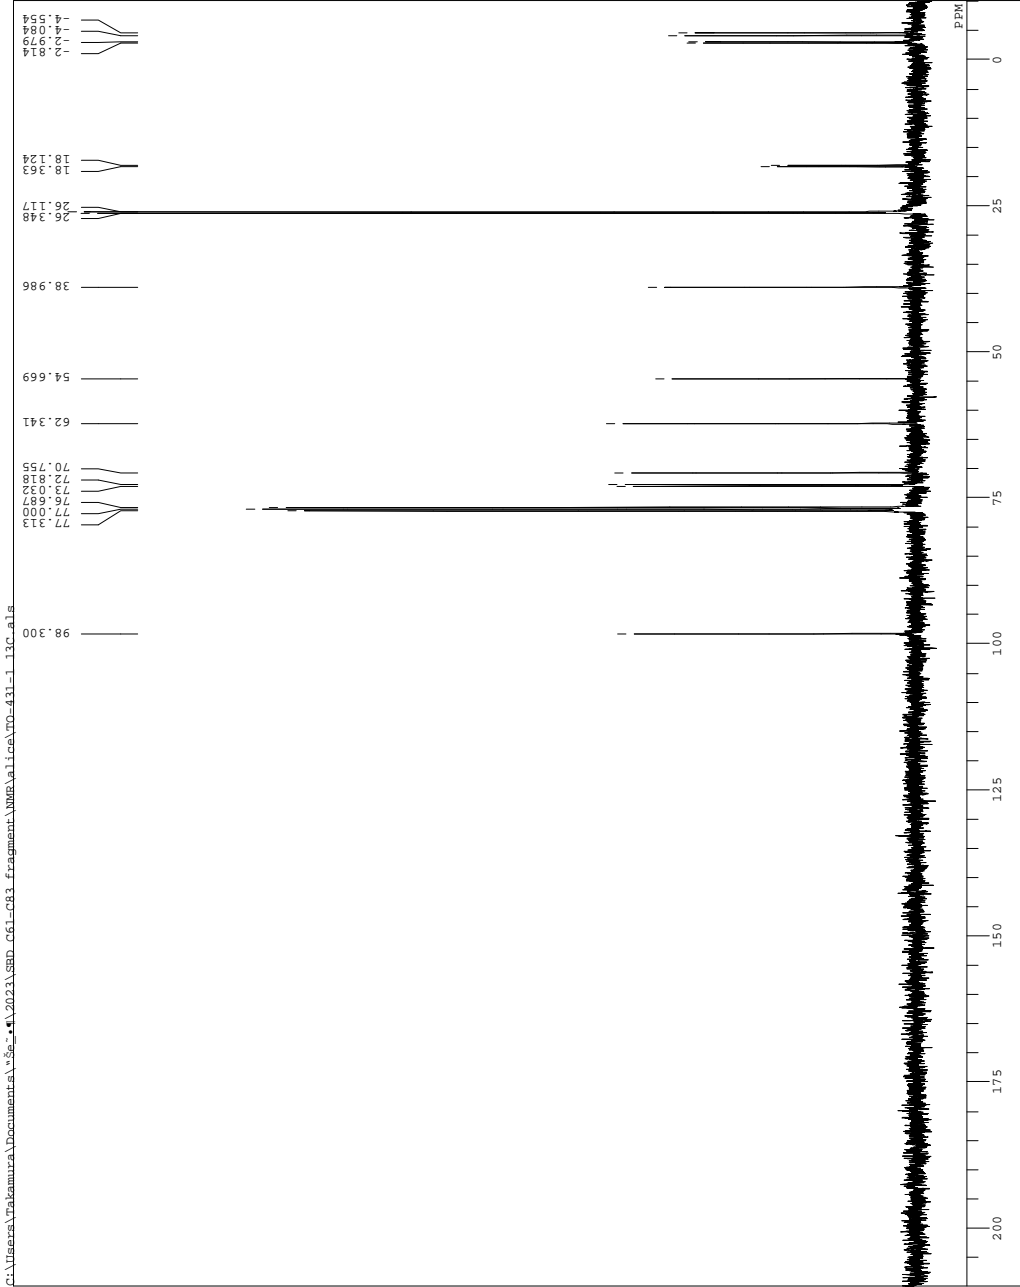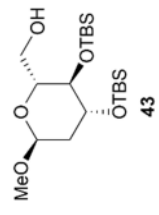

C:\Users\takamura\Documents\1\ser\_4\2023\SDP\_C61-C83\_fragment\NMR\1\ser\_442-1-re.als  
 DFILE TO-442-1-re.als  
 COMNT TO-442-1-re  
 DATEM 2023-03-20 15:43:12  
 PFM 1  
 EXMOD 22pul  
 OBERQ 599.76 MHz  
 OBSFQ 0.90 Hz  
 OBSFN 32768  
 POINT 9615.3 Hz  
 SLOWU 3.4079 sec  
 ACQTM 1.5921 sec  
 PD 5.63 usec  
 IRNUC 83.0 c  
 CTEMP cdcl3 7.26 Ppm  
 EXREF BF 4.20 Hz  
 RGAIN

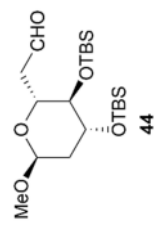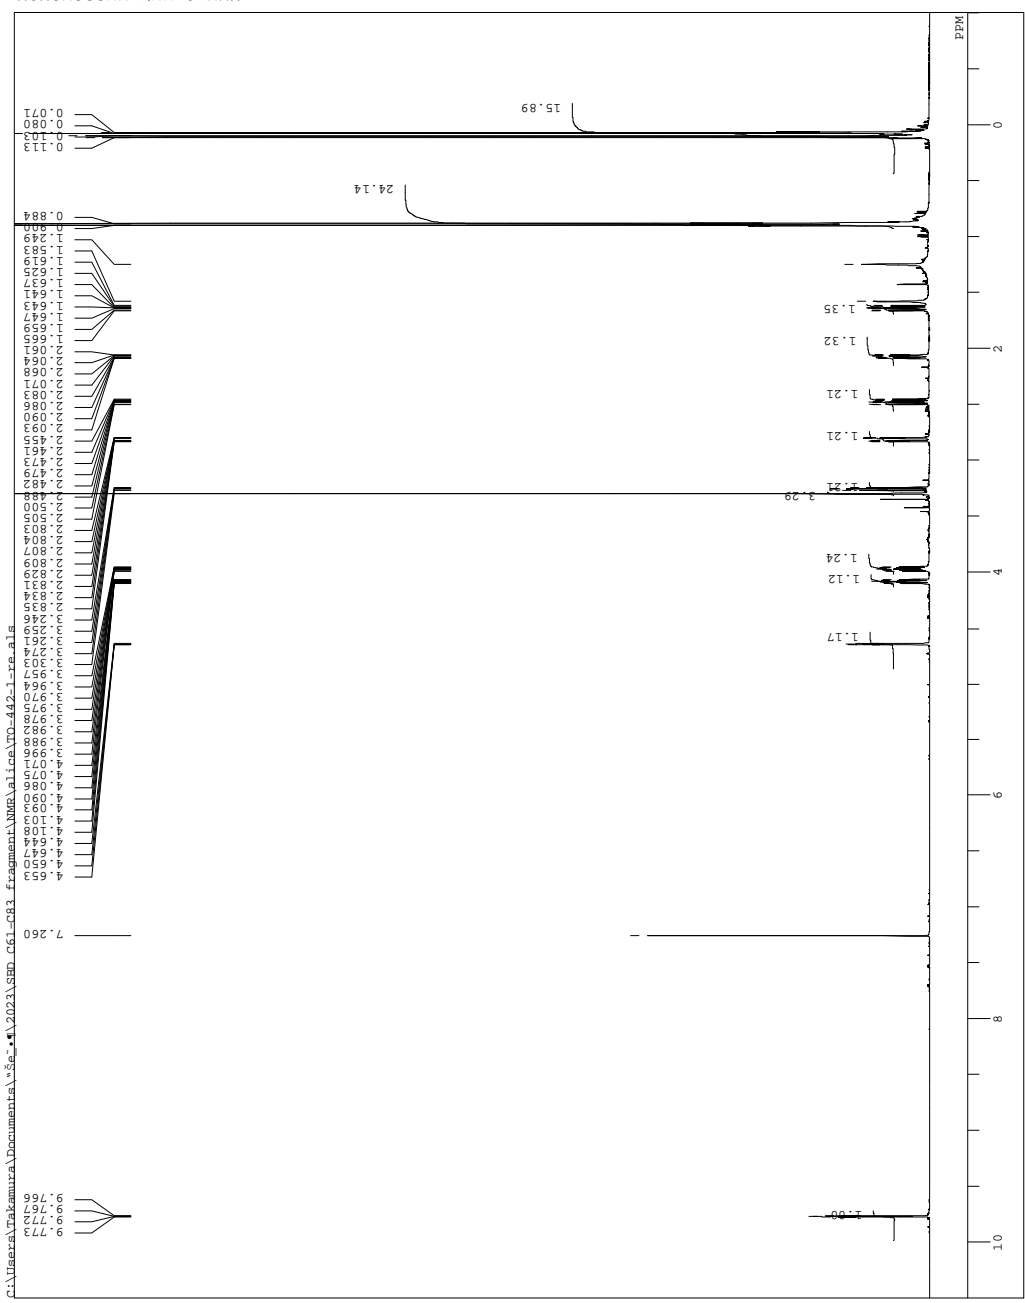

C:\Users\takamura\Documents\Se\*\2023\SED\_C61-C83\_fragment\NMR\alice\TD-442-1\_13C\_als

EXPTN TD-442-1\_13C\_als  
COMPT  
DATE\_ Fri Nov 16 22:57:45 2018  
SOLVENT CDCL3  
PULPROG zgpg30  
OBPRG zgpg30  
F2 100.40 MHz  
SFO 125.00 MHz  
AQ 1.00000000  
RG 32768  
RPOINT 27173.90 Hz  
FREQ 27173.90 Hz  
SCANS 2  
ACQMS 1.2055 sec  
PD 0.17940 sec  
PULPROG zgpg30  
PULSE 1H  
CTEMP 27.3 c  
SLVNT CDCL3  
SFO 125.00 MHz  
RG 32768  
RGAIN 2.24

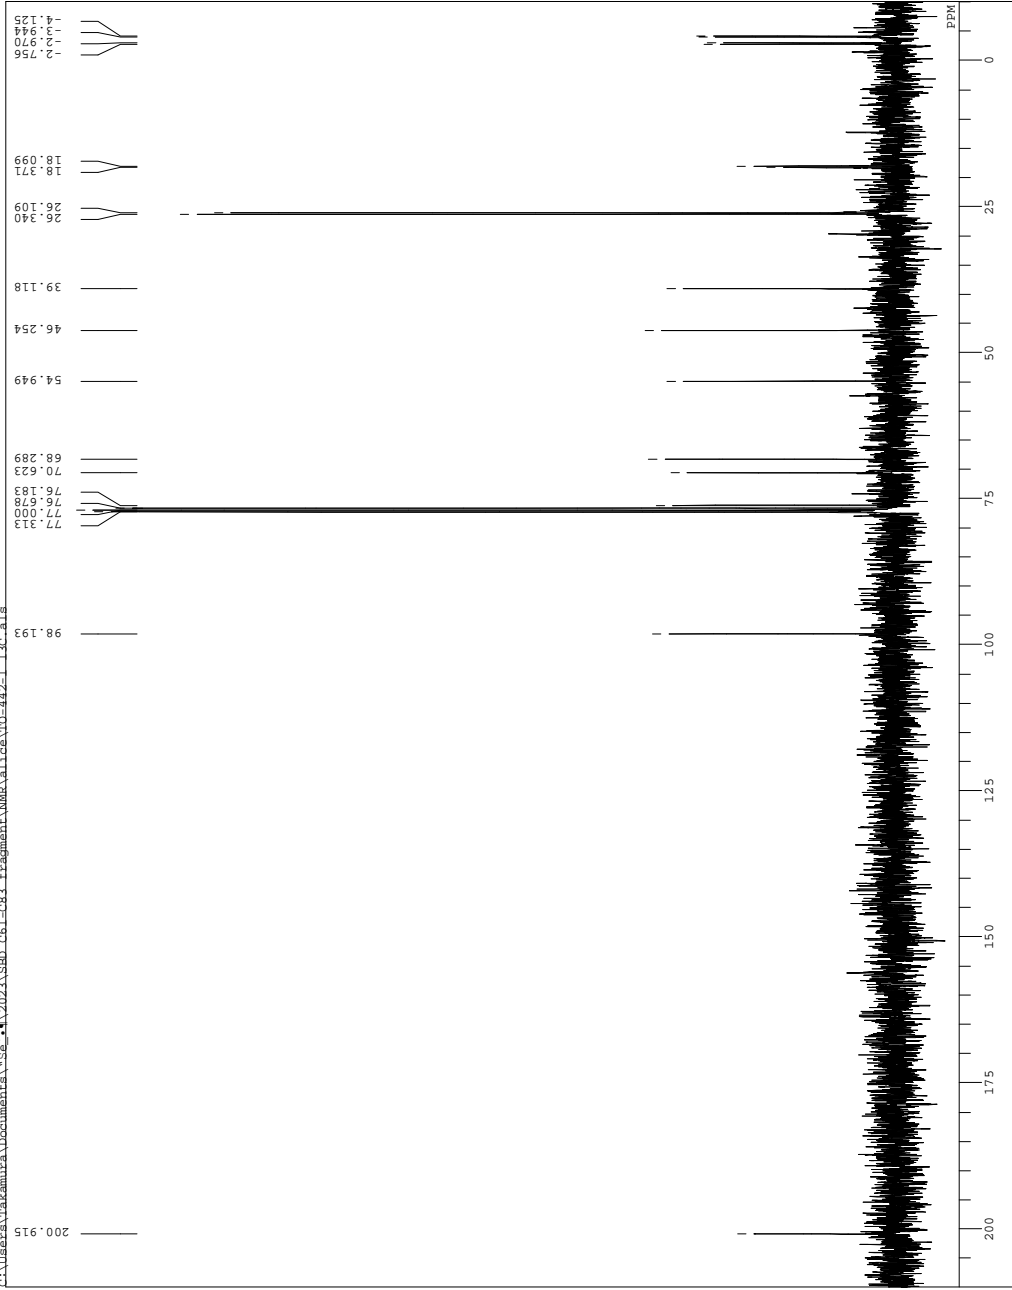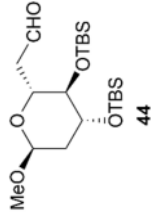

C:\Users\Takamura\Documents\4\Sec\_4\2023\SED\_C61-C83\_Fragment\NMR\data\TO-443\_1\_als

FILE TO-443-3.als  
 DATE Thu Nov 29 19:03:59 2018  
 INSTR BMN  
 EXMOD NON  
 ORNOC 1H  
 PULPROG zgpg30  
 OSETF 0  
 OBFIN 10500.00 Hz  
 FREQ 799.2760 Hz  
 SCANS 8  
 ACQTM 4.0973 sec  
 AQT 2.640 usec  
 PULPROG zgpg30  
 IERNO 1H  
 IERNC 1H  
 IERNA 1H  
 SLVMT CDCL3  
 EXPRF 7.26 ppm  
 REFIN 0.12 Hz  
 REFIN

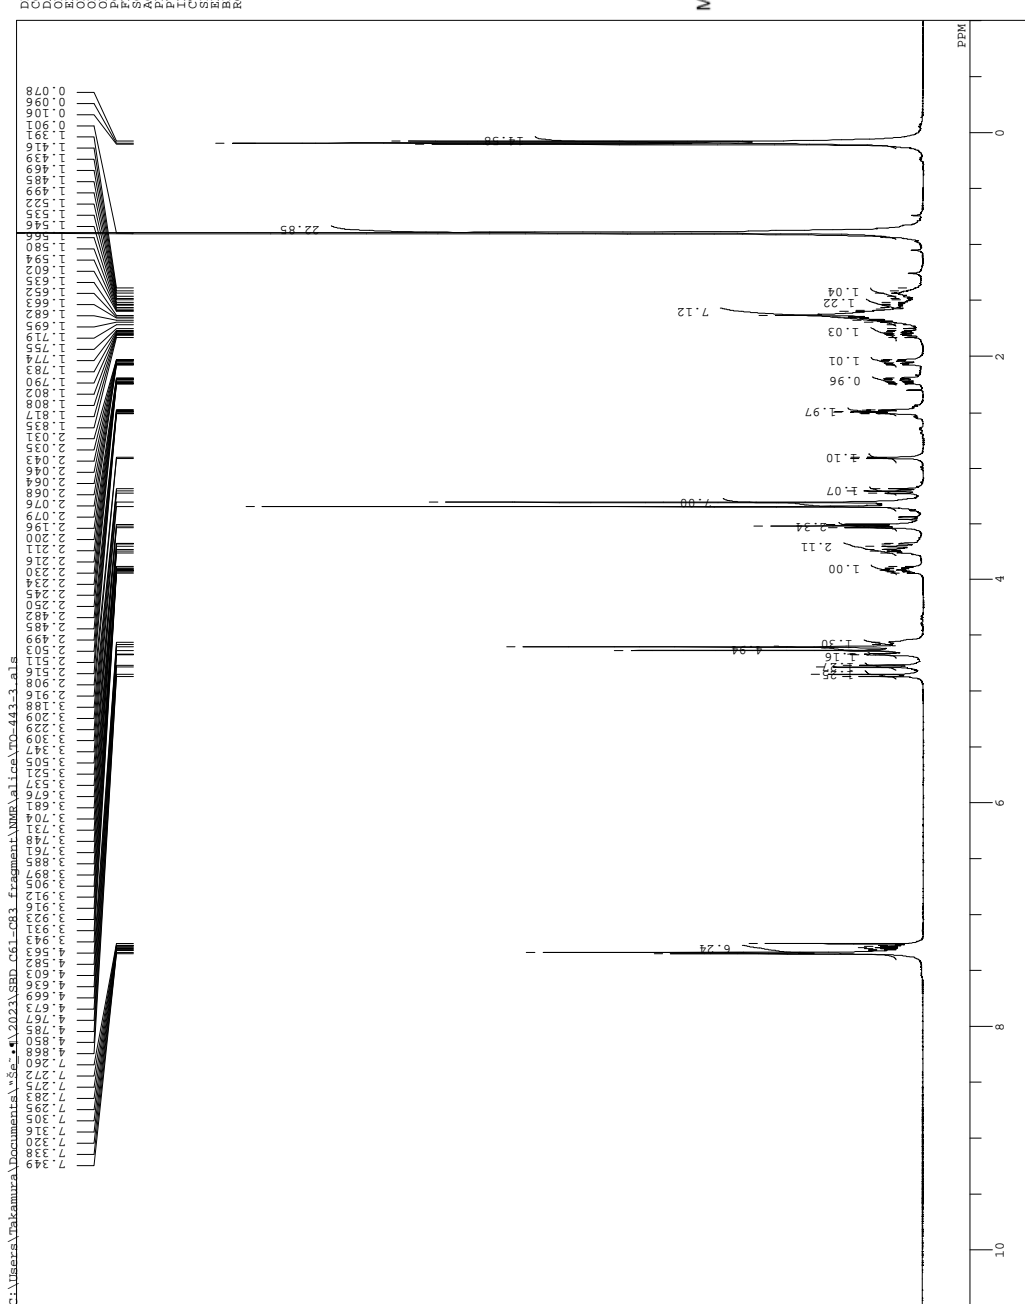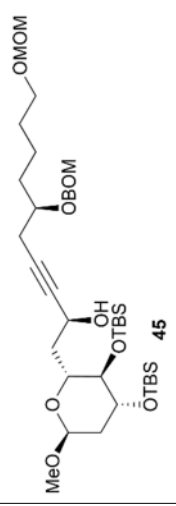

File TO-443-3 13C.als  
 Date Thu Nov 29 19:41:26 2018  
 Name 13C  
 Observed 100.40 MHz  
 Observed 125.00 KHz  
 Observed 10500.00 Hz  
 F2 27173.98 Hz  
 F1 680  
 SCANS 1.7540 sec  
 PD 1.7540 sec  
 PD QTM 6.80 usec  
 PW 26.6 c  
 IRMS 77.00 EPM  
 SLANT CDCL3 2.20 Hz  
 EXREF  
 RGAIN

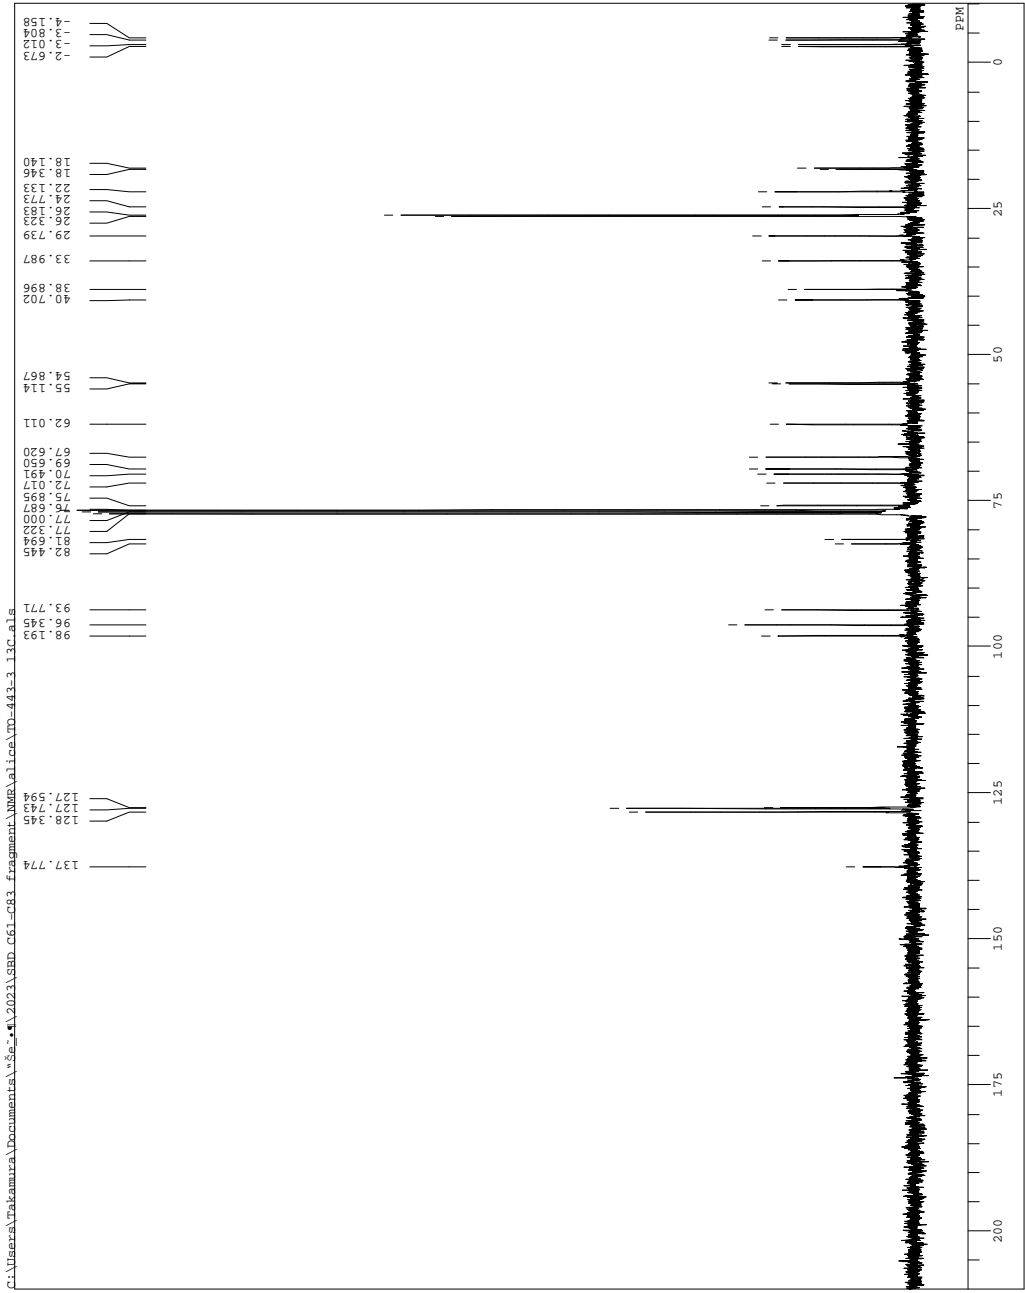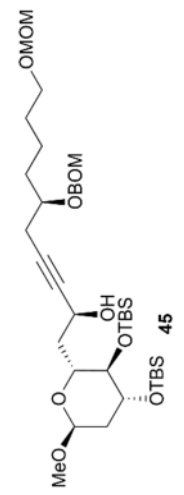

C:\Users\Takamura\Documents\Se\*\2021\SHD\_661-c83\_fragments\NMR\1c\TO-443-2\_als  
 DEFILE TO-443-2\_als  
 DATE Thu Nov 29 12:06:27 2018  
 DATTM Thu Nov 29 12:06:27 2018  
 ORBVC 1H  
 ORBVD NOM  
 ORBVO 399.65 MHz  
 ORBVF 124.00 KHz  
 ORBVM 10500.00 Hz  
 ORBVS 7931.60 Hz  
 FREQU 4.0988  
 SCANS 2.9010 sec  
 PD CYM 6.40 usec  
 PM1  
 IRMVC 1H  
 IRMVD 24.9 C  
 IRMVF CDCL3  
 IRMVM 7.26 PPM  
 EXREF 0.14 Hz  
 RGAIN

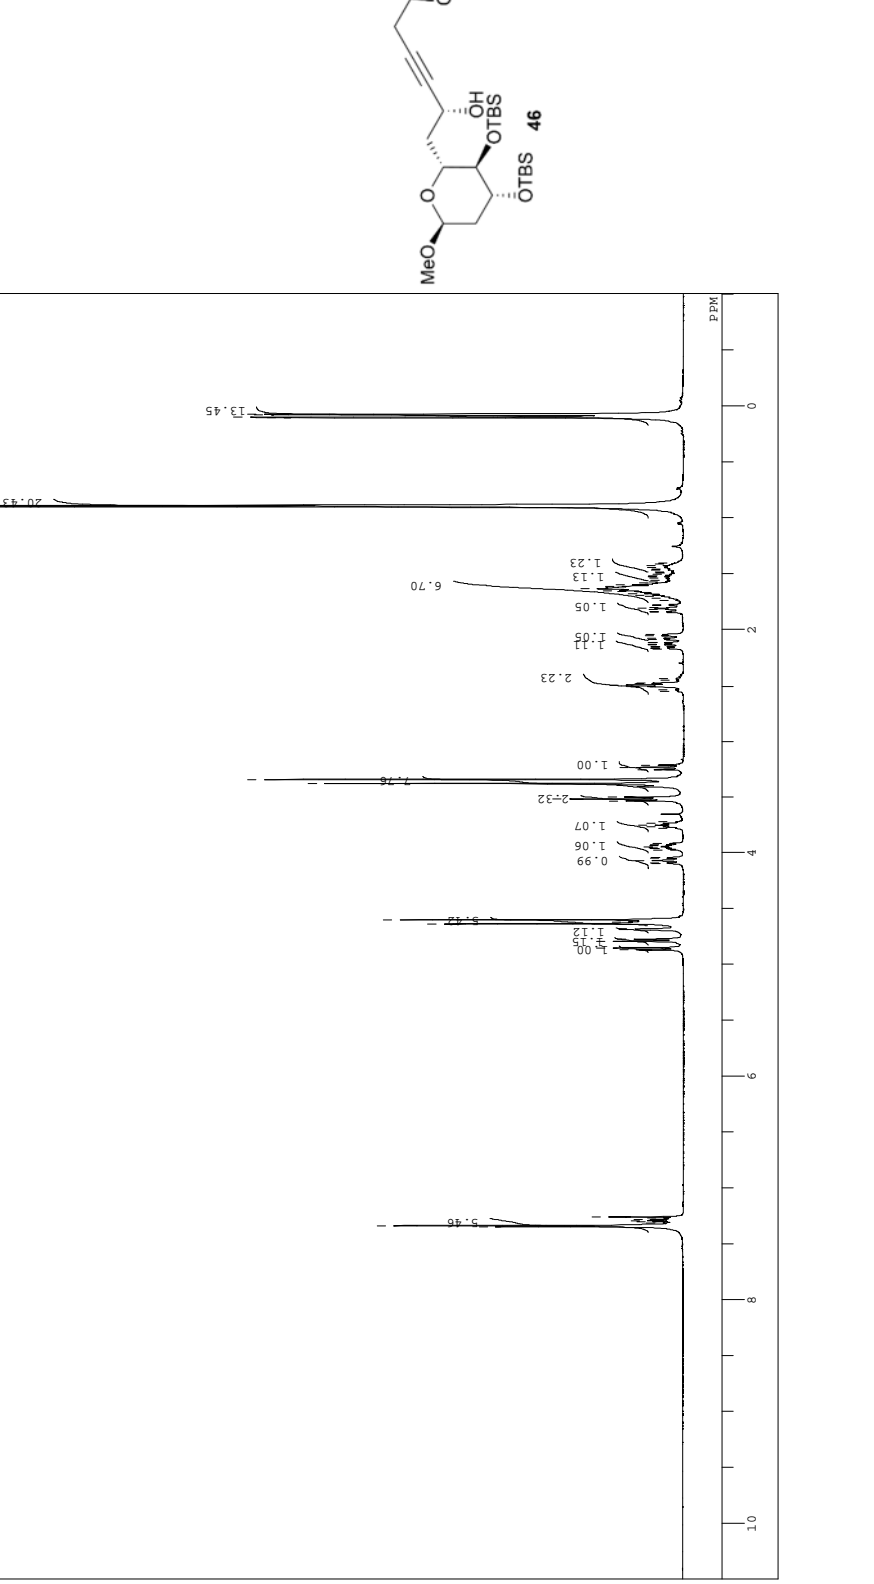

C:\Users\takamura\Documents\Se...2023\SED\_061-c83\_Fragment\_NMR\data\TO-443-2\_13C.nmr

DFILE TO-443-2\_13C.nmr  
NAME Se...  
DATE Thu Nov 29 12:34:17 2018  
PROCNO 13C  
PROBHD 5mm  
PULPROG zgpg30  
AQ 1.488  
RG 1.290  
SFO 125.00  
WDW EM  
SSB 0  
LB 1.00  
GB 0  
PC 1.00  
FREQ 100.62  
NUC1 13C  
NUC2 13C  
SOLVENT CDCl3  
RGAIN 2.24

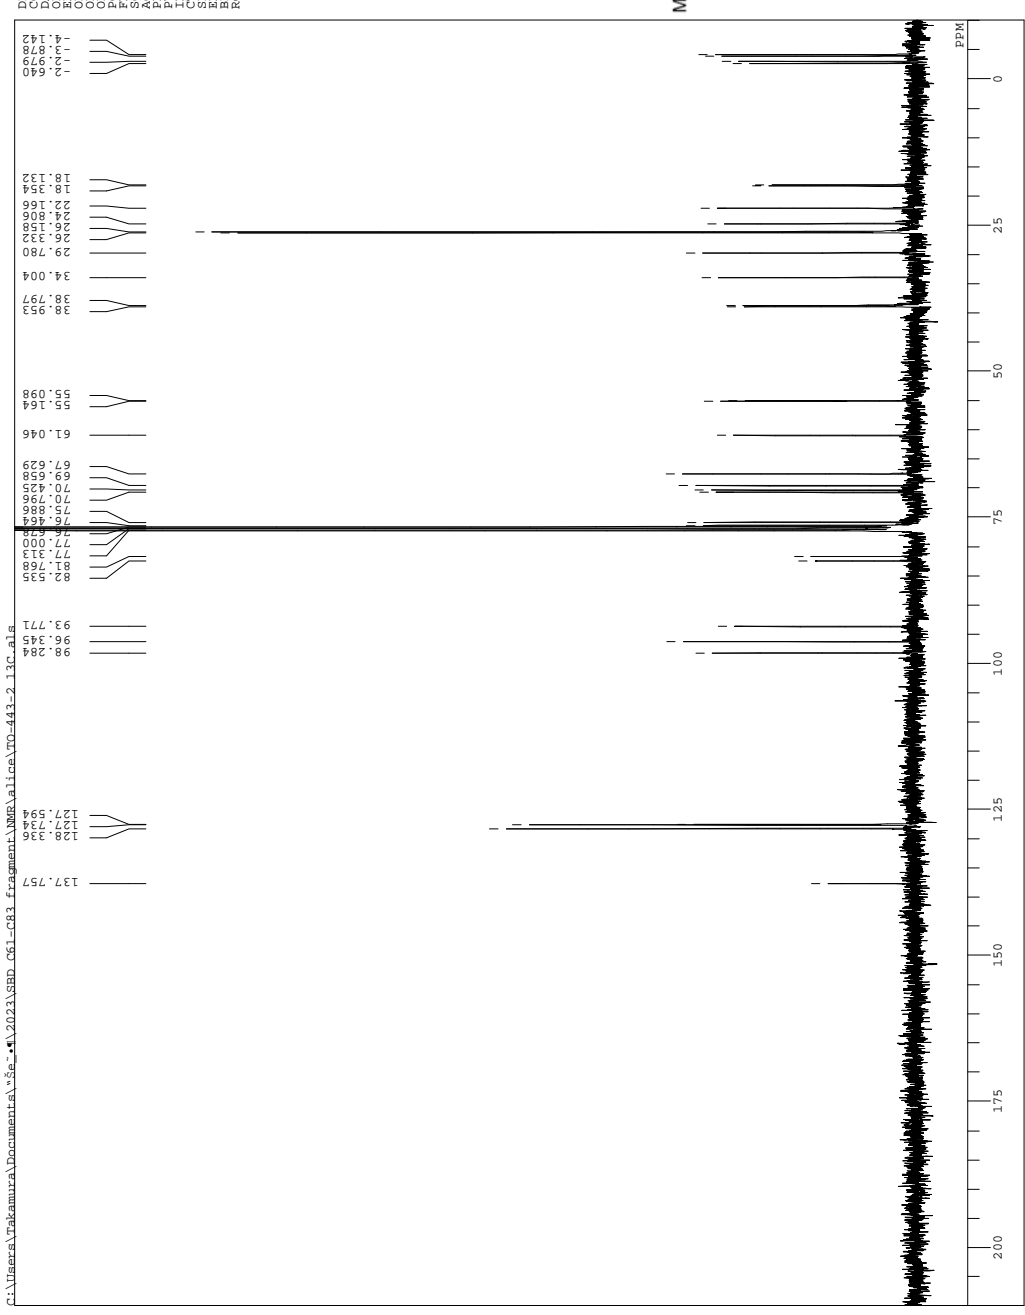

C:\Users\Takamura\Documents\Se\*\2023\BHD\_C61-C83\_Fragment\NMR\1c\402\_als

```

DRIF TO-402.als
COM1 Tue Nov 21 19:24:20 2017
DATE
PULSE 1H
ORBIT 1H
PROB 1H
PULPROG zgpg30
399.65 MHz
ORBIT 1H
PROB 1H
PULPROG zgpg30
124.00 KHz
FREQ 105327.68 Hz
SOLVENT CDCL3
SCANS 4
AQ 4.0893 sec
RG 2.9010 sec
PD 5.00 usec
P1 0.00 usec
P2 0.00 usec
P3 0.00 usec
P4 0.00 usec
P5 0.00 usec
P6 0.00 usec
P7 0.00 usec
P8 0.00 usec
P9 0.00 usec
P10 0.00 usec
PC 25.3 C
SOLVENT CDCL3
SOLNT CDCL3
REF 7.26 ppm
RGAIN 0.12 Hz
RGAIN 0.22
  
```

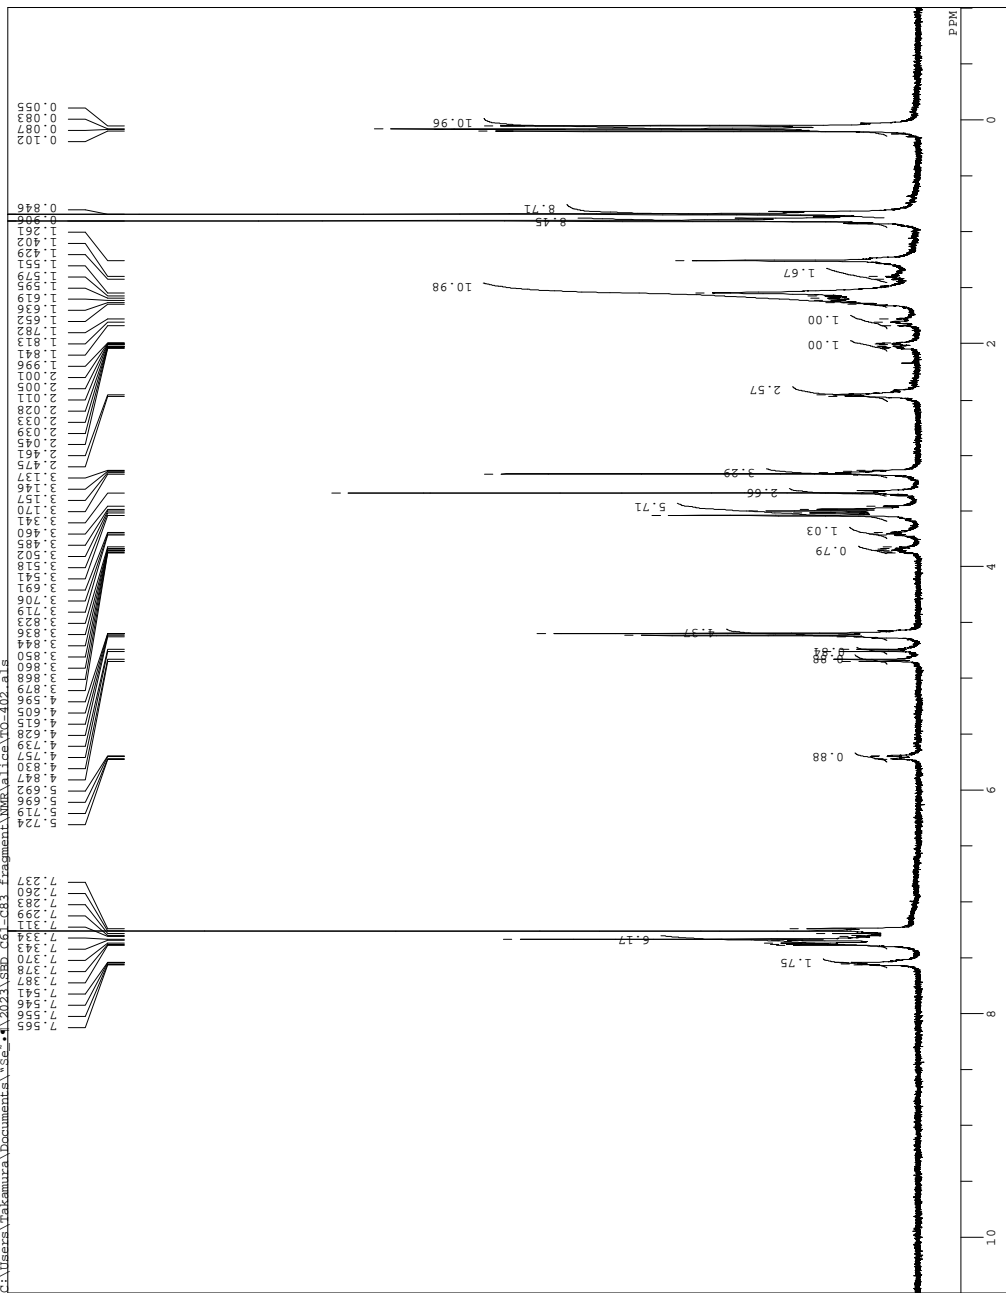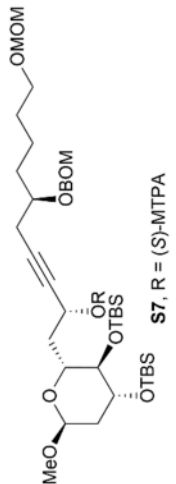



C:\Users\takamura\Documents\Sample\2021\8BD\_C61-C93\_Fragment\NMR\data\402\_13C\_als  
 FILE TO-402\_13C\_als  
 COMPT Sat Dec 01 06:55:34 2018  
 DATEM 13C  
 DEPTM 13C  
 OBMOC 13C  
 OBFPC 13C  
 OBSST 100.40 MHz  
 OBSST 125.00 KHz  
 POINT 10532768 Hz  
 FREQU 27173.90 Hz  
 SCANN 1200  
 PC 1.7940 sec  
 PD 6.80 usec  
 PULC 1H  
 CTMP 26.3 C  
 SLVNT CDCl3 77.00 ppm  
 REFR 2.00 Hz  
 RGAIN 2.24

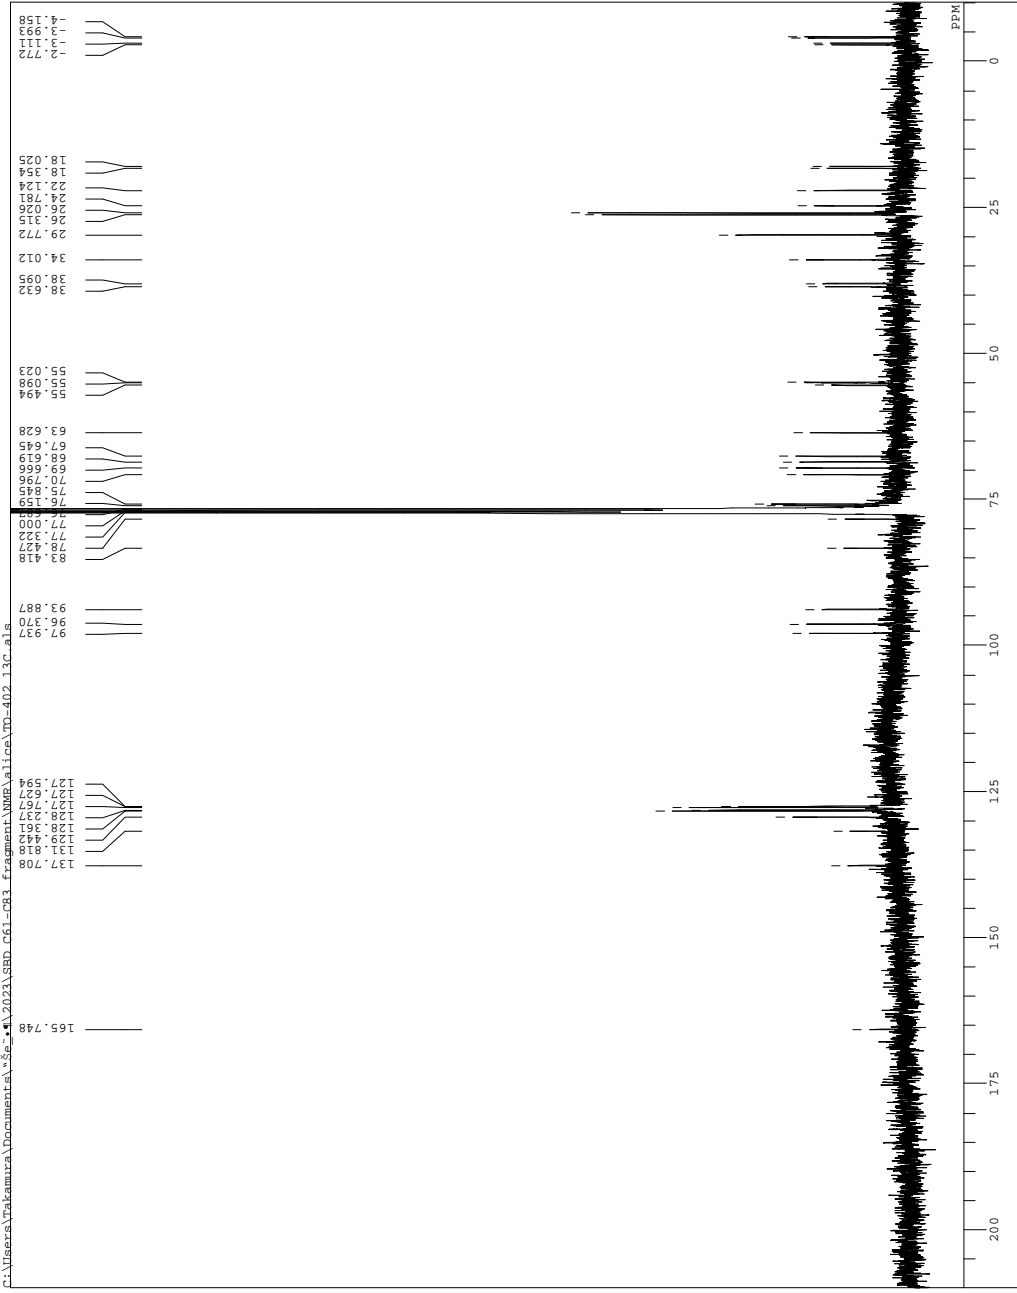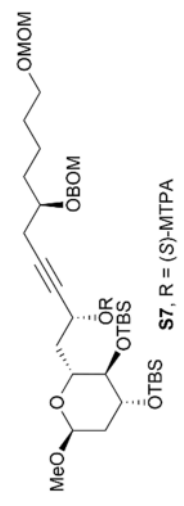

FILE TO-401.als  
 DATE The Nov 21 15:24:32 2017  
 ORNTC LH  
 OBSFQ NON  
 OBSFQ 399.65 MHz  
 OBSFQ 124.00 KHz  
 OBSFQ 10590768 Hz  
 PREQ 79831.60 Hz  
 SCANS 4.0988  
 PDVFM 2.9010 sec  
 PDVFM 6.40 usec  
 PULPROG zgpg30  
 PC 25.3 c  
 CPMPC 1H  
 CPMPC CDCL3  
 SILVNT CDCL3  
 EXREF  
 RGAIN 7.26 pfm  
 0.22 Hz

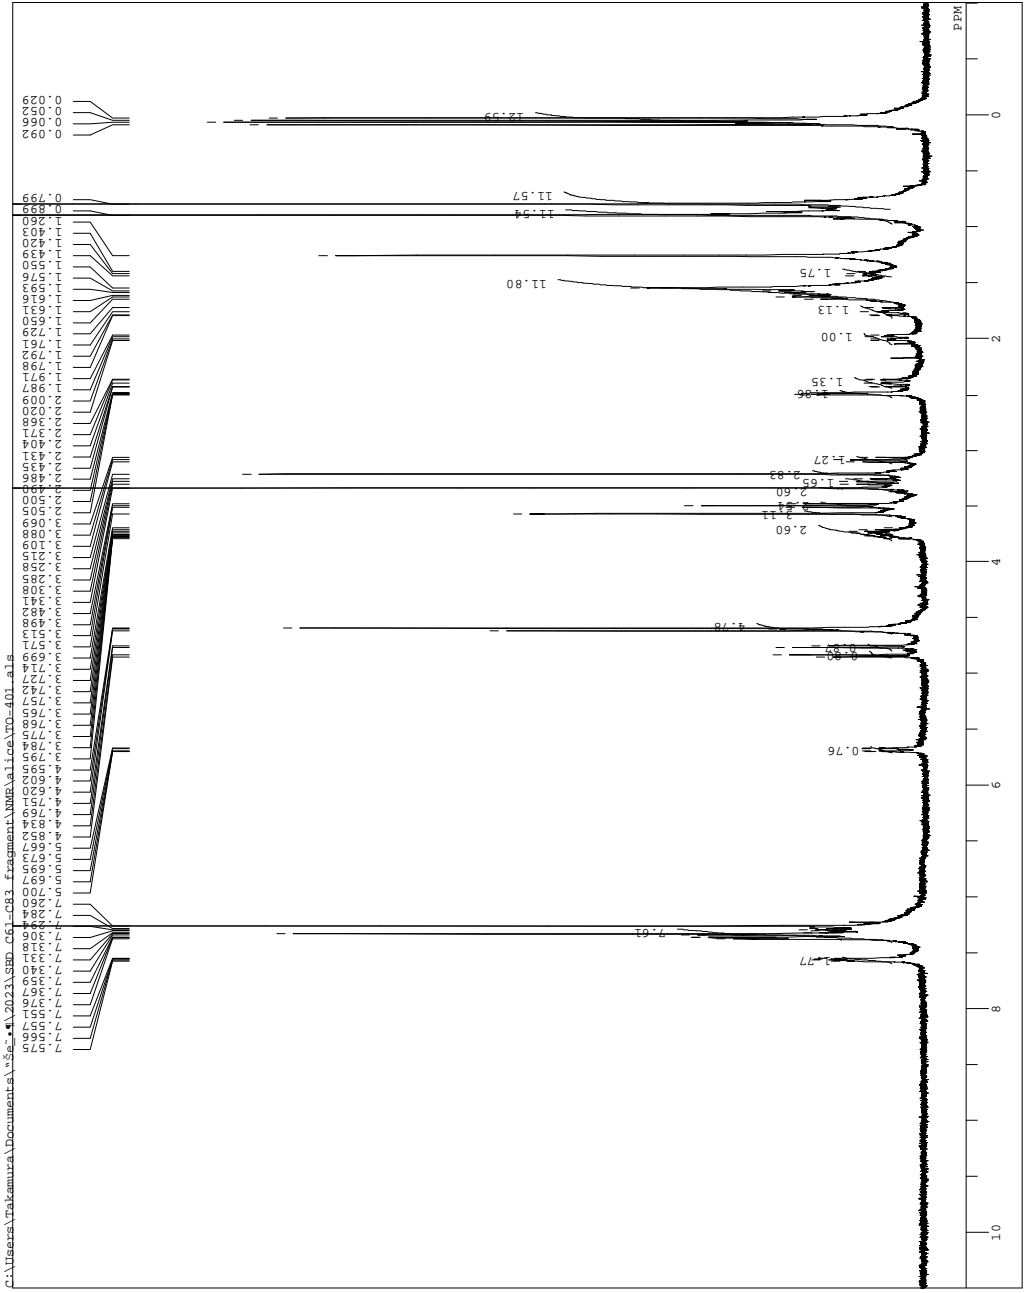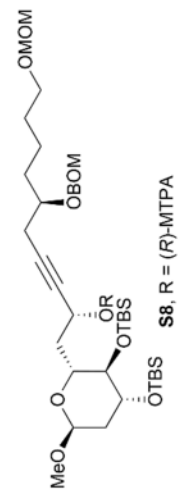

C:\User\Takamura\Documents\Se\_4\2021\SRD\_561-C83\_Fragment\NMR\alica\TO-401\_13c\_als

DEFILE TO-401\_13c.als  
 CONTM Fri Nov 30 06:26:00 2018  
 ORBIT 13C  
 EXMOD BCM  
 OBSF 100.40 MHz  
 OBSF2 125.00 MHz  
 ORFN 10500.00 Hz  
 PFG1 27137.90 Hz  
 SCANS 10000  
 ACQTM 1.7259 sec  
 PUL 1.6780 usec  
 INTC 1H  
 SLEN 26.2 c  
 SOLV CDCL3  
 EXREF 77.00 PPM  
 REIN 2.00 Hz  
 RGAIN 2.24

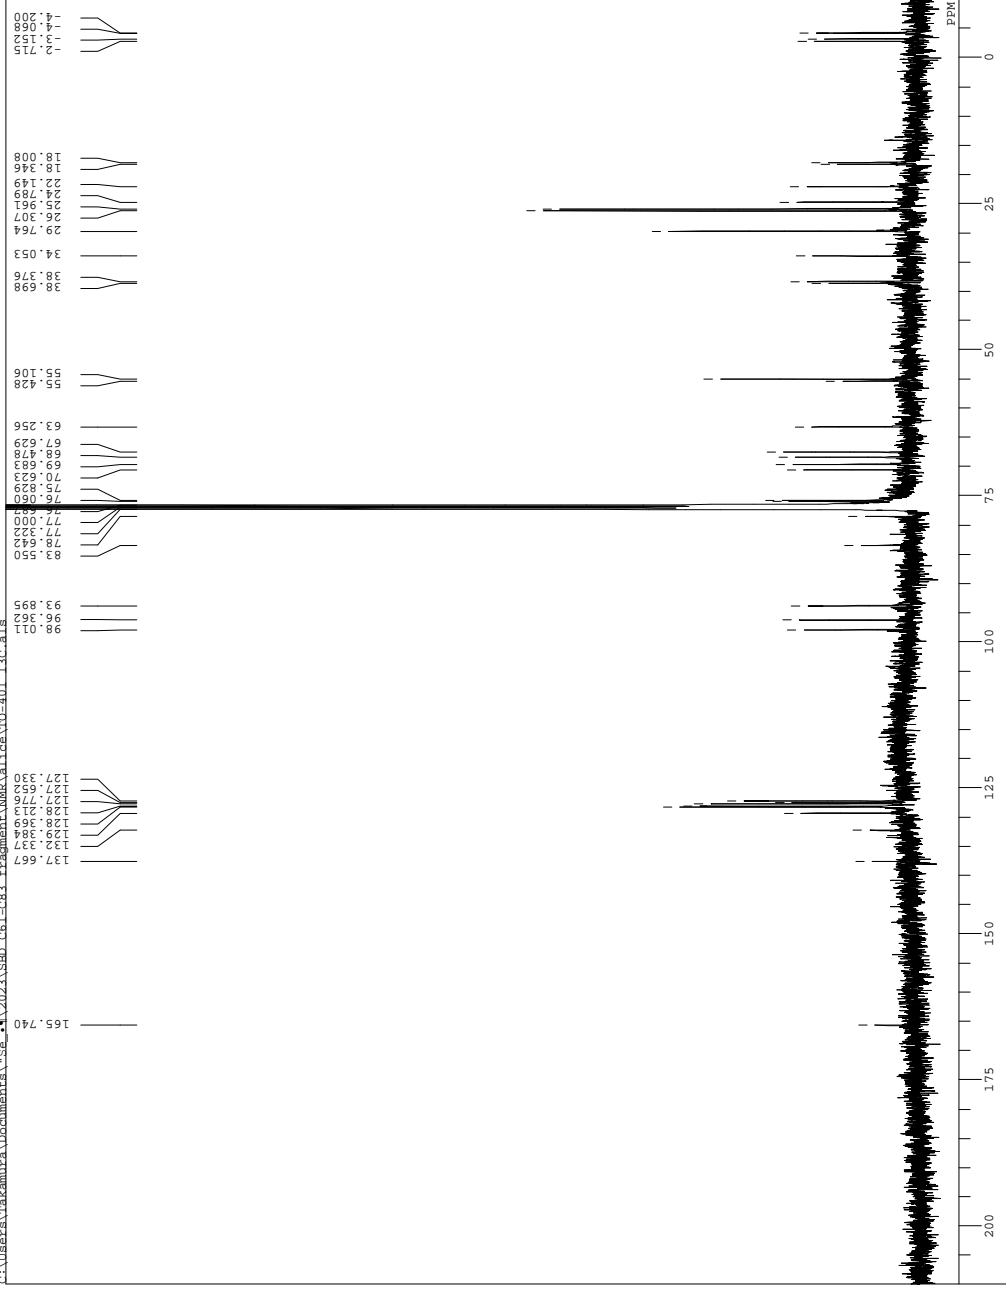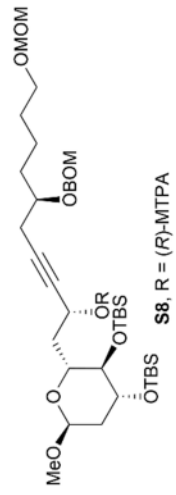

C:\Users\Trakamura\Documents\Se...2021\GSD\_661-c31\_fragments\NMR\data\KH48-1H-re-als  
 DEPT KH-48-1H-re-als  
 F2 20210330 15:17:51  
 DATE\_ 20210330  
 DTIME H1  
 ORNVC H1  
 PROC s2pul  
 CPD 599.76 MHz  
 RESOL 5.06 KHz  
 ORFN 0.60 Hz  
 FREQ 9615.38 Hz  
 SCANS 32  
 PD 3.48  
 PCYTM 1.5521 sec  
 PM1 5.65 usec  
 PM2  
 TEND 83.0 c  
 SFTV cdc13  
 SFTV 7.26 ppm  
 EXRF 0.36 Hz  
 RGAIN

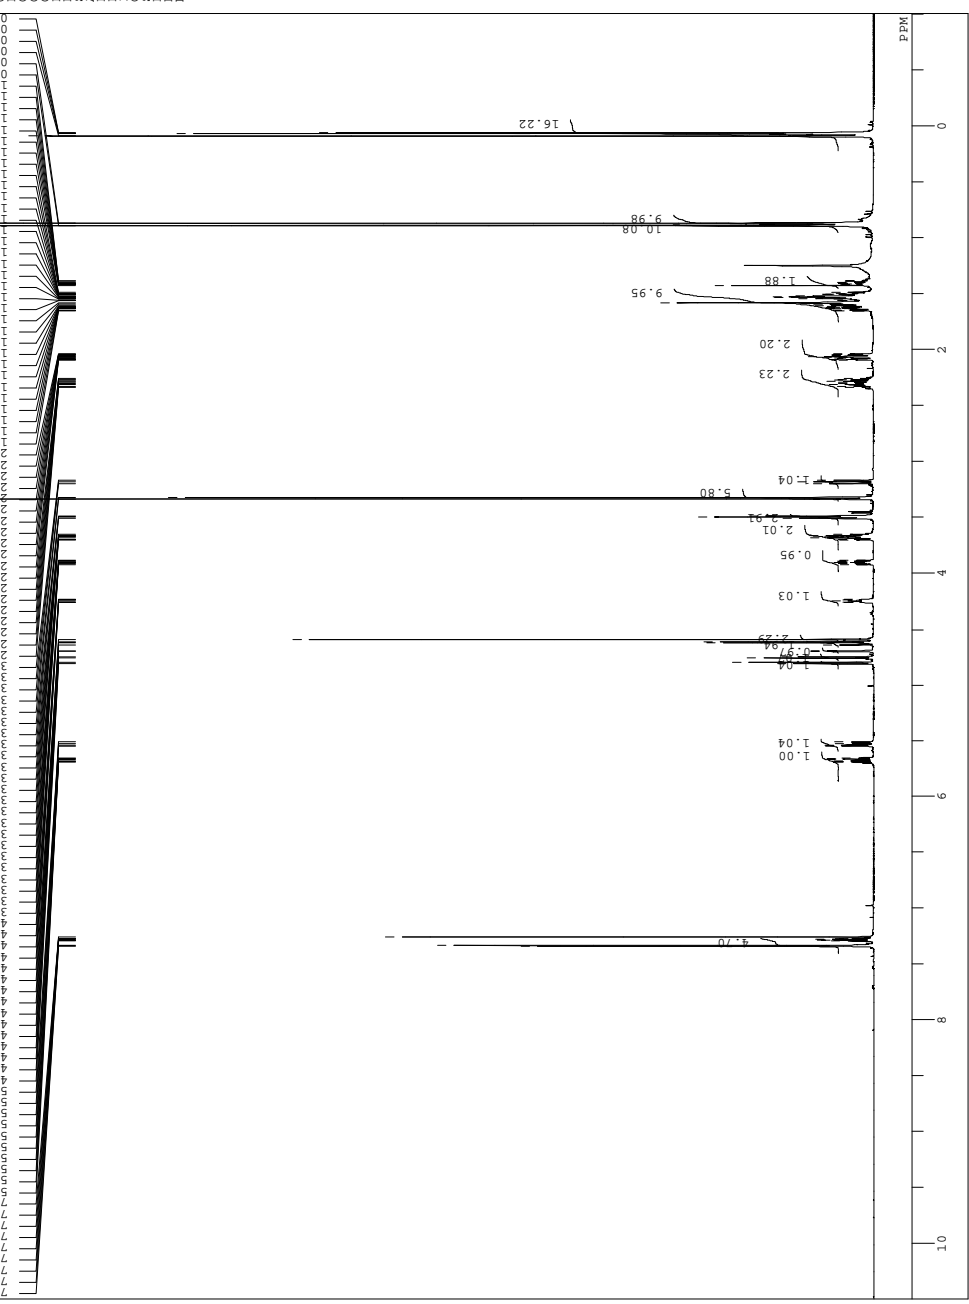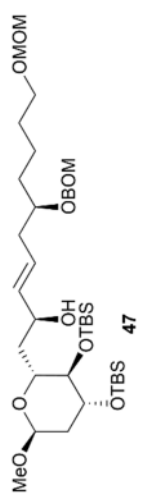



C:\Users\Takamura\Documents\Se...2023\8RD\_06\_1-C33\_Fragment\NMR\11ca\KH-90-1H\_als  
 F2  
 DATE KH-90-1H\_als  
 TIME 11:03:44  
 INSTR 2013-12-14 11:03:44  
 PROC H1  
 PULPROG zgpg30  
 SFO 399.91 MHz  
 OBSF1 1.99 KHz  
 OBSF2 32768 Hz  
 P1 3.20 sec  
 FREQ0 6410.26 Hz  
 SCANS 32  
 PD 1.5000 sec  
 PL 0.00 dB  
 PC 7.25 usec  
 PGM1 c  
 PRG1 c  
 CTRM c  
 CTRP c  
 CTRD c  
 SILENT c  
 SILVER c  
 EXPT 7.25 PPM  
 EXPR 0.154 Hz  
 RGAIN

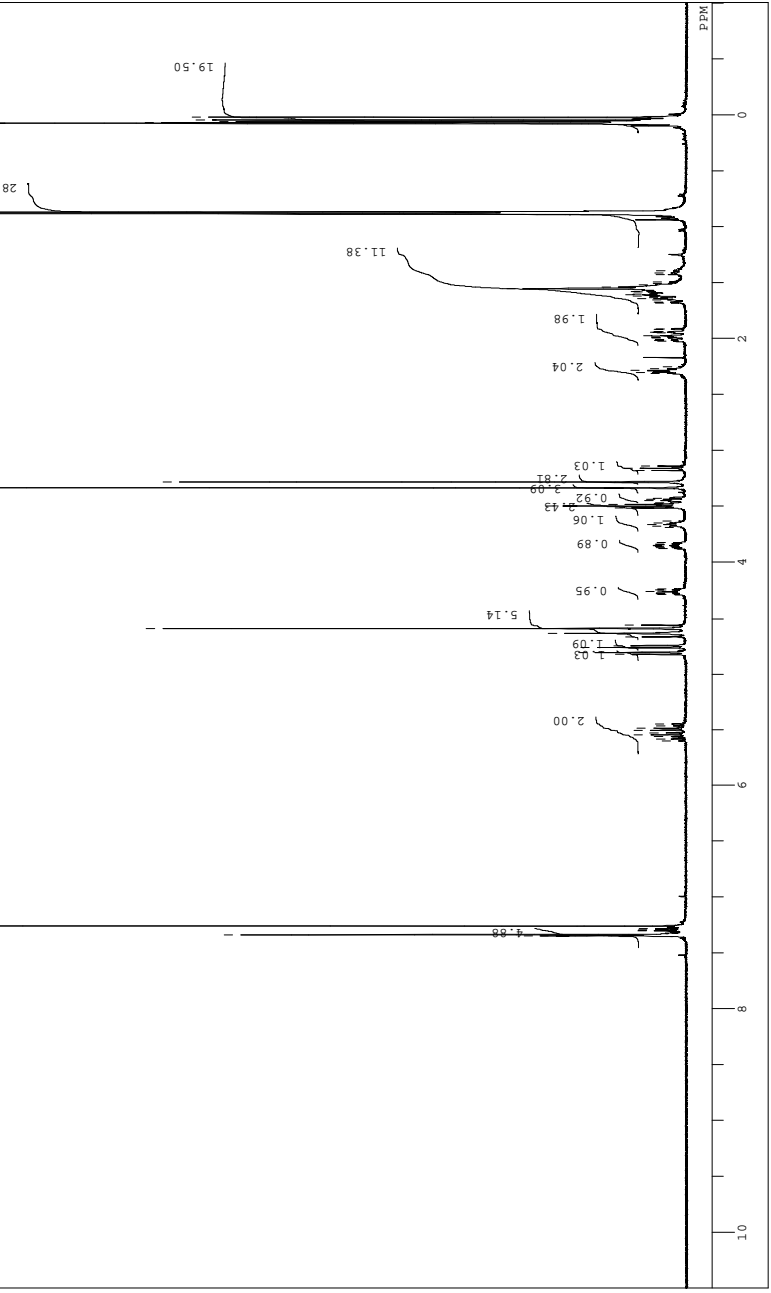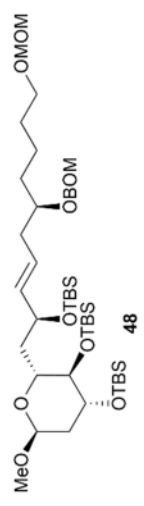

C:\Users\takamura\Documents\Se\*\2023\8RD\_C61-C83\_fragment\NMR\all\ce\SI-84-13C.nls

DATE SI-84-13C.nls  
 TIME 01:19  
 DATE 2023-04-03 21:37:44  
 INSTR C13  
 PROC s2pul 150.82 MHz  
 OBSCF 6.72 KHz  
 OBSRG 32768 Hz  
 PULPROG zgpg30  
 FREQD 37878.79 Hz  
 SCANS 64  
 DS 4  
 PD 2.1345 sec  
 PDSF 6.10 usec  
 PULP1  
 PULPROG cdc13  
 TEMPC 83.0 C  
 PROT1  
 SILVNT cac13  
 EXPT 77.00 PPM  
 EXRG 0.160 Hz  
 RGAIN

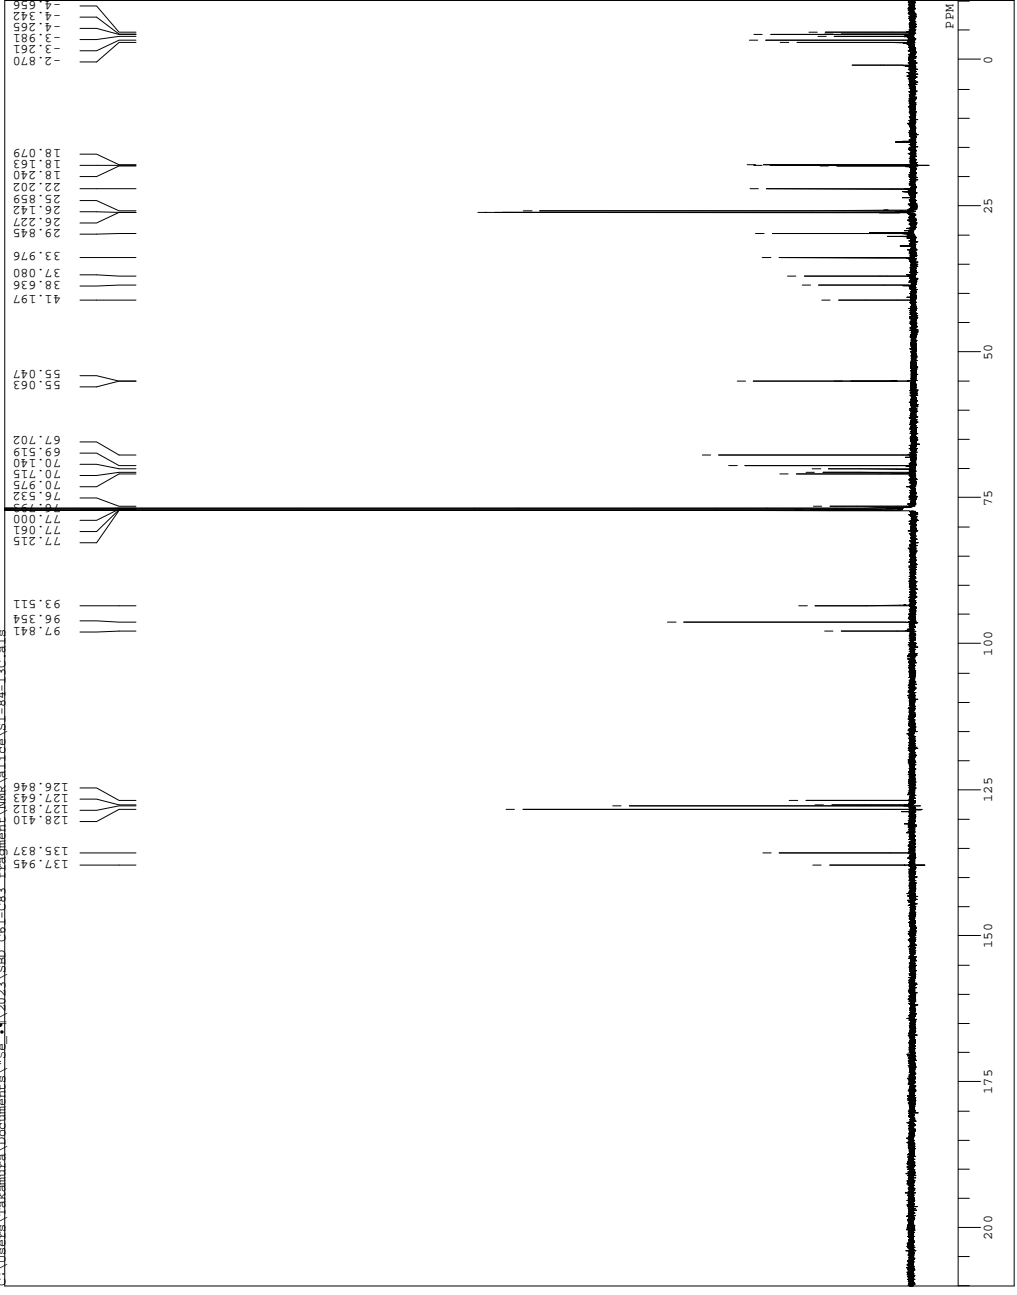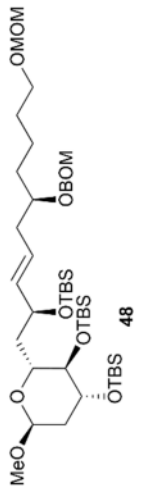

C:\Users\Takamura\Documents\Se...2021\SHD\_661-c83\_fragment\NMR\valica\KH-91-1-1-H\_als  
KH-91-1-1-H\_als  
Date\_20121214\_15:34:24  
Name\_H1  
P1  
PROC s2pul  
EXMO 399.91 MHz  
OBSF 1.95 KHz  
OBPR 2.00 Hz  
FREQ 6410.26 Hz  
SCANS 32  
AQTM 3.5000 sec  
PULPROG zgpg30  
PWL 1.7.25 usec  
IRNUC  
SOLNT cdcl3  
SUNT  
EXREF 7.26 ppm  
RGAIN 0.12 Hz  
RGAIN

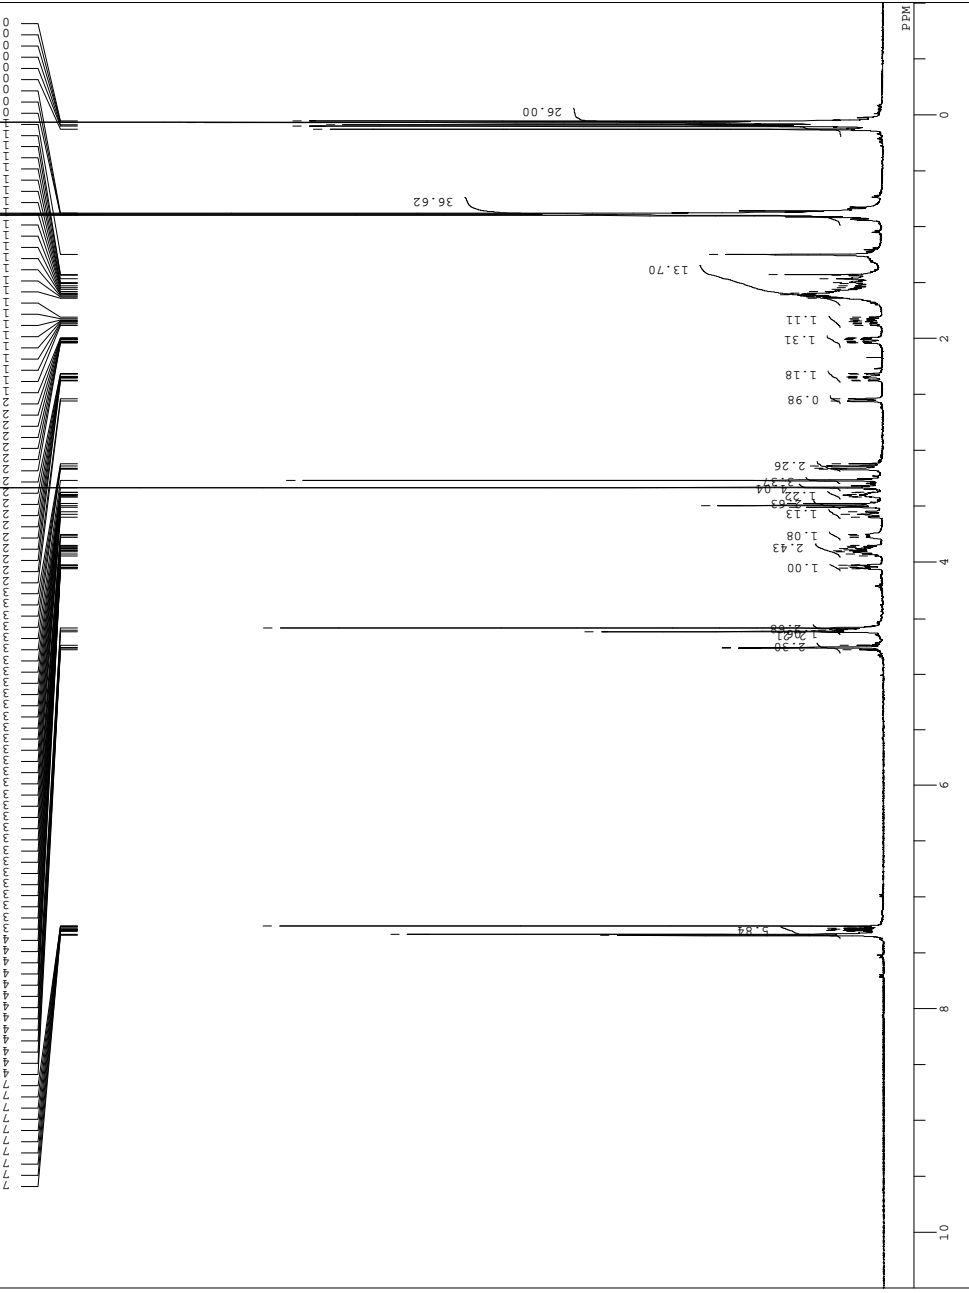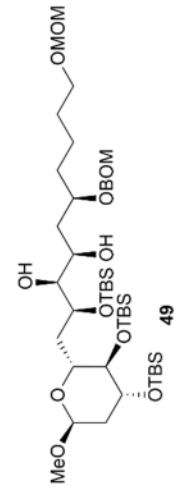



C:\Users\Trkamuza\Documents\Sample1\2023\Fragment\MMValica\KH-91-1-13c\_als

DFILE KH-91-1-13c\_als  
COMPR KH-91-1-13c\_Data  
CQ19-12-14 15:39:08  
NAME C19-12-14  
EXPNO 2  
PROCNO 1  
EXMOD s2pul  
OBSFQ 100.56 MHz  
PULPROG zgpg30  
OBPRG 8.30 Hz  
OBSF1 8.30 Hz  
POINT 32768 Hz  
SCANS 25000.64  
ACQTM 1.3107 sec  
P1 1.6993 sec  
P2 5.30 usec  
IIRNUC  
CENPC cdc13 30.0 c  
CENRF  
CENRF 77.00 ppm  
EXPRF  
BF 0.12 Hz  
RGAIN 60

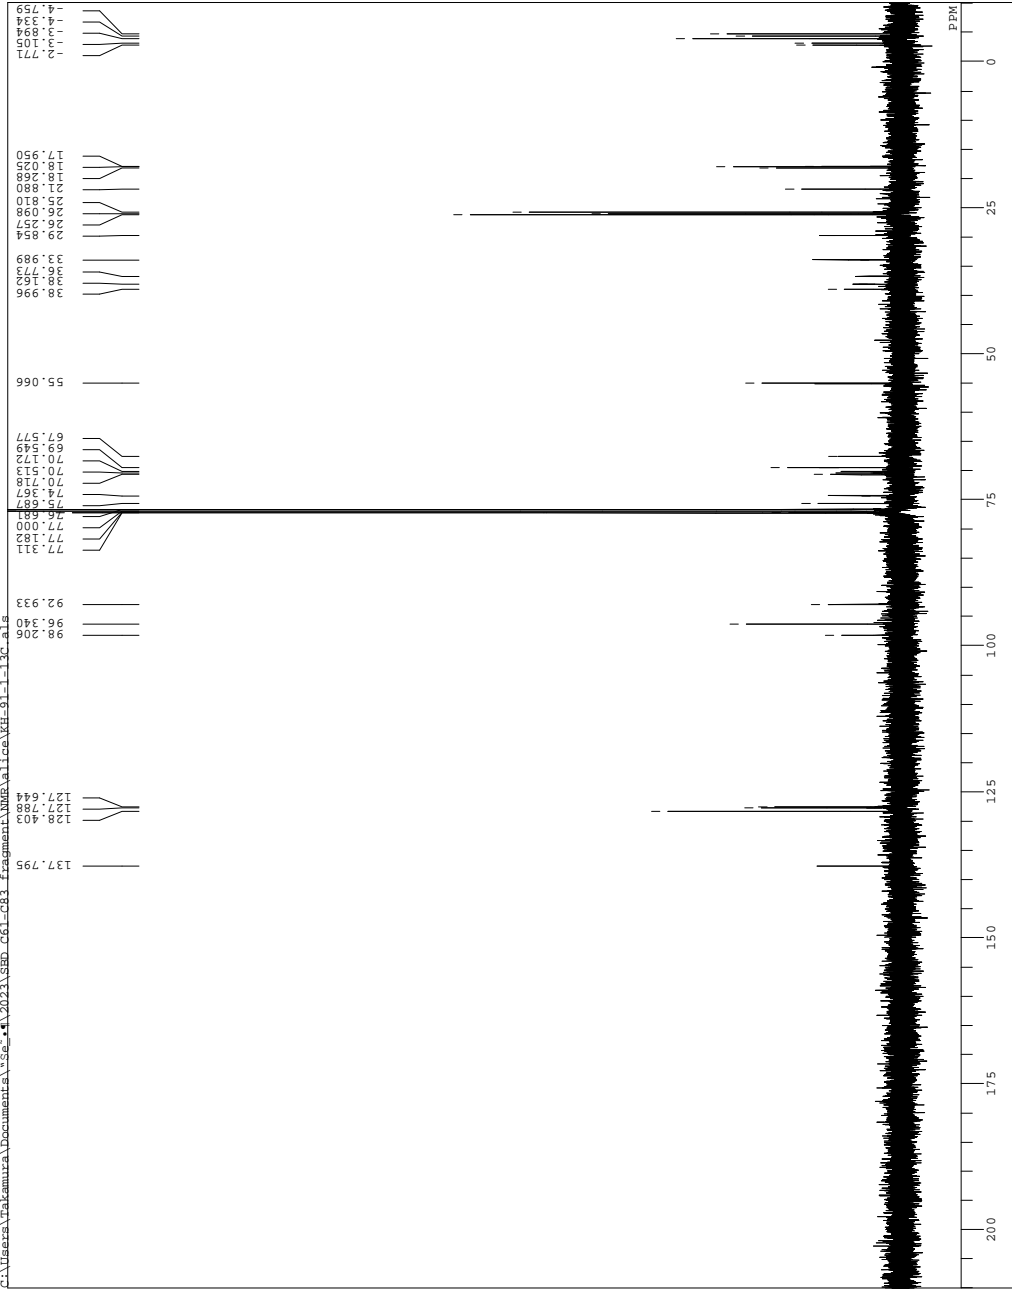

DATE KH-128-2-re-als  
TIME 2023-03-06 11:37:43  
ORNTC H1  
PULPRO s2pul  
ORSET 399.91 MHz  
FREQ 1.99 KHz  
PULPRG 32768 Hz  
PCYEM 6410.26 Hz  
SCANS 32  
PD 1.5000 sec  
PL 7.15 usec  
PWI c  
PRM c  
TEMP 37.0 c  
SILVNT cac13  
EXREF 7.26 ppm  
RGAIN 4.42

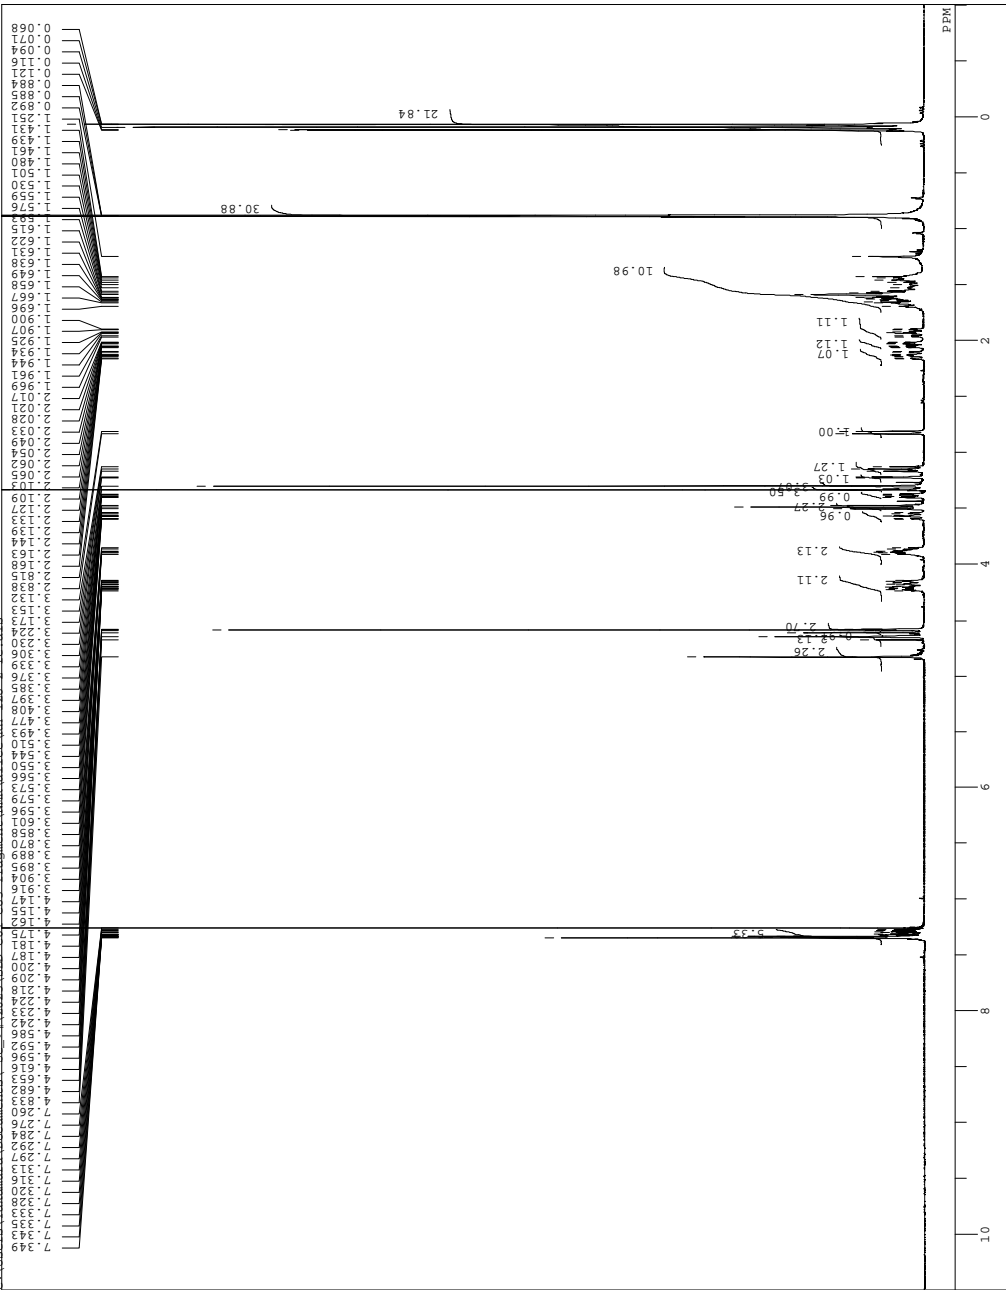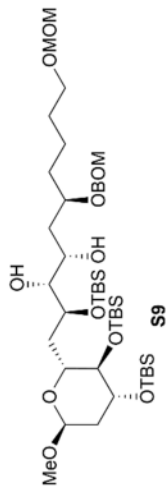

S9

C:\Users\Takahara\Documents\Se-4\2021\8HD\_661-c83\_fragment\NMR\all\ce\KH-128-2-13c\_als

```

DETE KH-128-2-13c_als
NAME 8HD_661-c83_fragment
DATE 2023-03-15 13:49
DIR C:\Users\Takahara\Documents\Se-4\2021\8HD_661-c83_fragment\NMR\all\ce\KH-128-2-13c_als
PROC 1
PULPROG zgpg30
PROBHD 5mm QNP 1H/13
PROB 1
P1 12.00
PC 0.64
PCYTM 2.1349 sec
PCYTD 6.05 usec
PCYTH 40.0 c
SFO 125.76 MHz
NUC1 13C
NUC2 1H
SOLVENT cdcl3
SOLNT 77.00 PPM
EXREF 0.13 Hz
RGAIN 1.60
  
```

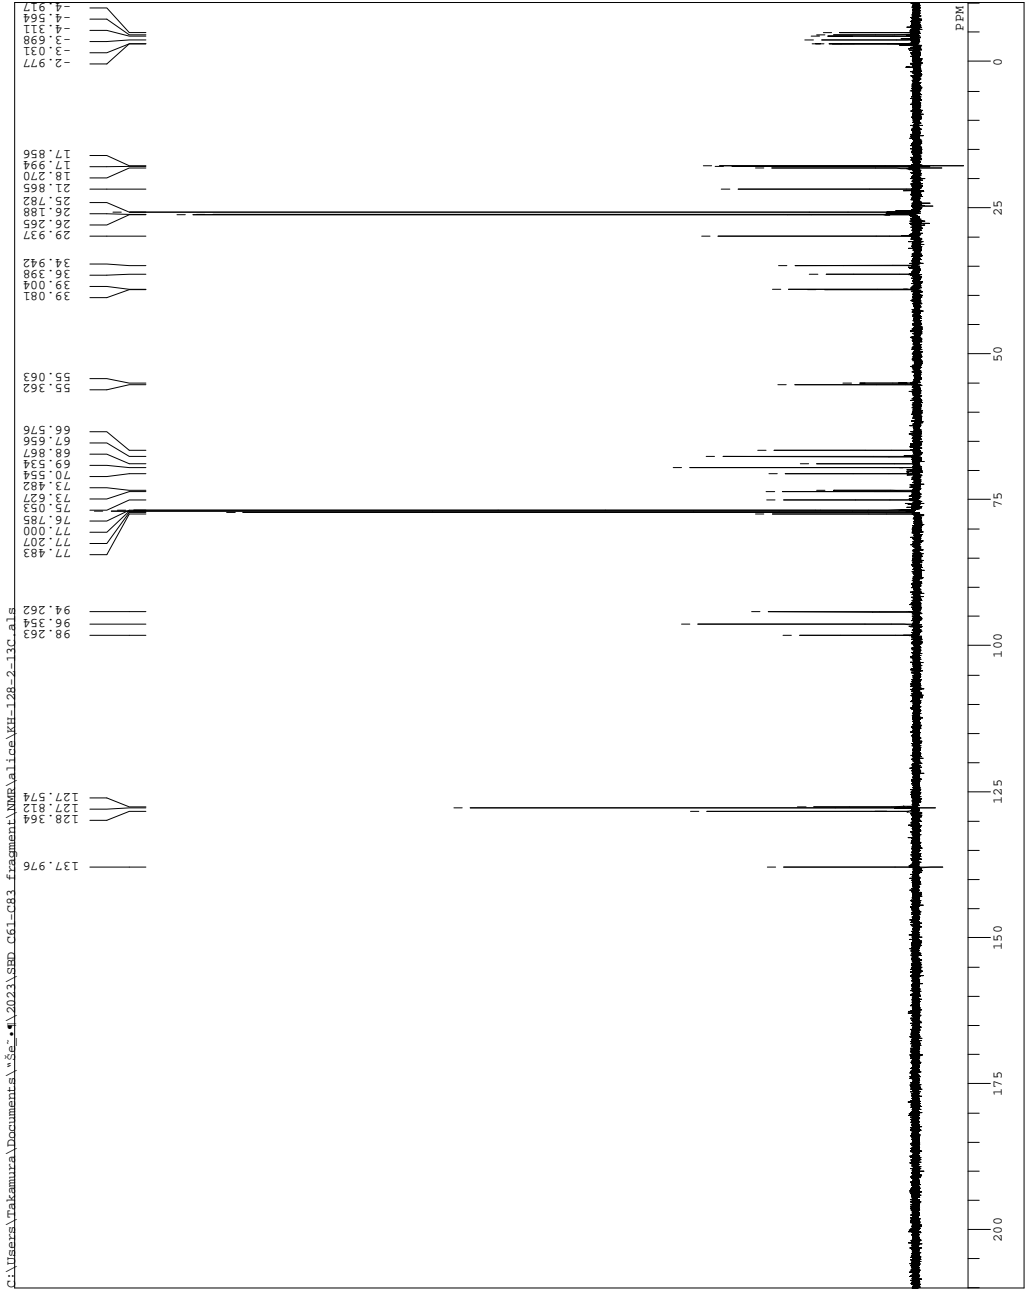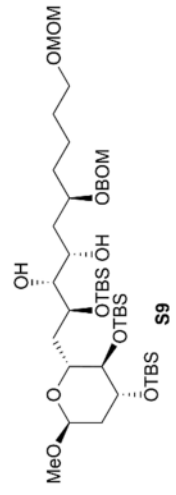

C:\Users\Takamura\Documents\Sample\2021\EBD\_C61-C83\_Fragment\NMR\valice\KH-108-2\_als

DRIF KH-108-2\_als  
COMT KH-108-2  
DATE 2019-10-09 19:21:58  
DEMO H1  
NAME H1  
PULPRO s2pul  
ORSET 599.76 MHz  
FREQ 5.06 KHz  
PROB 32068 Hz  
PULPRO 9615.38 Hz  
SCANS 3.4073 sec  
PD 1.5921 sec  
PFI 5.25 usec  
CTEMP 25.0 C  
SOLNT cdc13  
SOLNT 7.26 ppm  
RF 0.12 Hz  
RGAIN 4.44

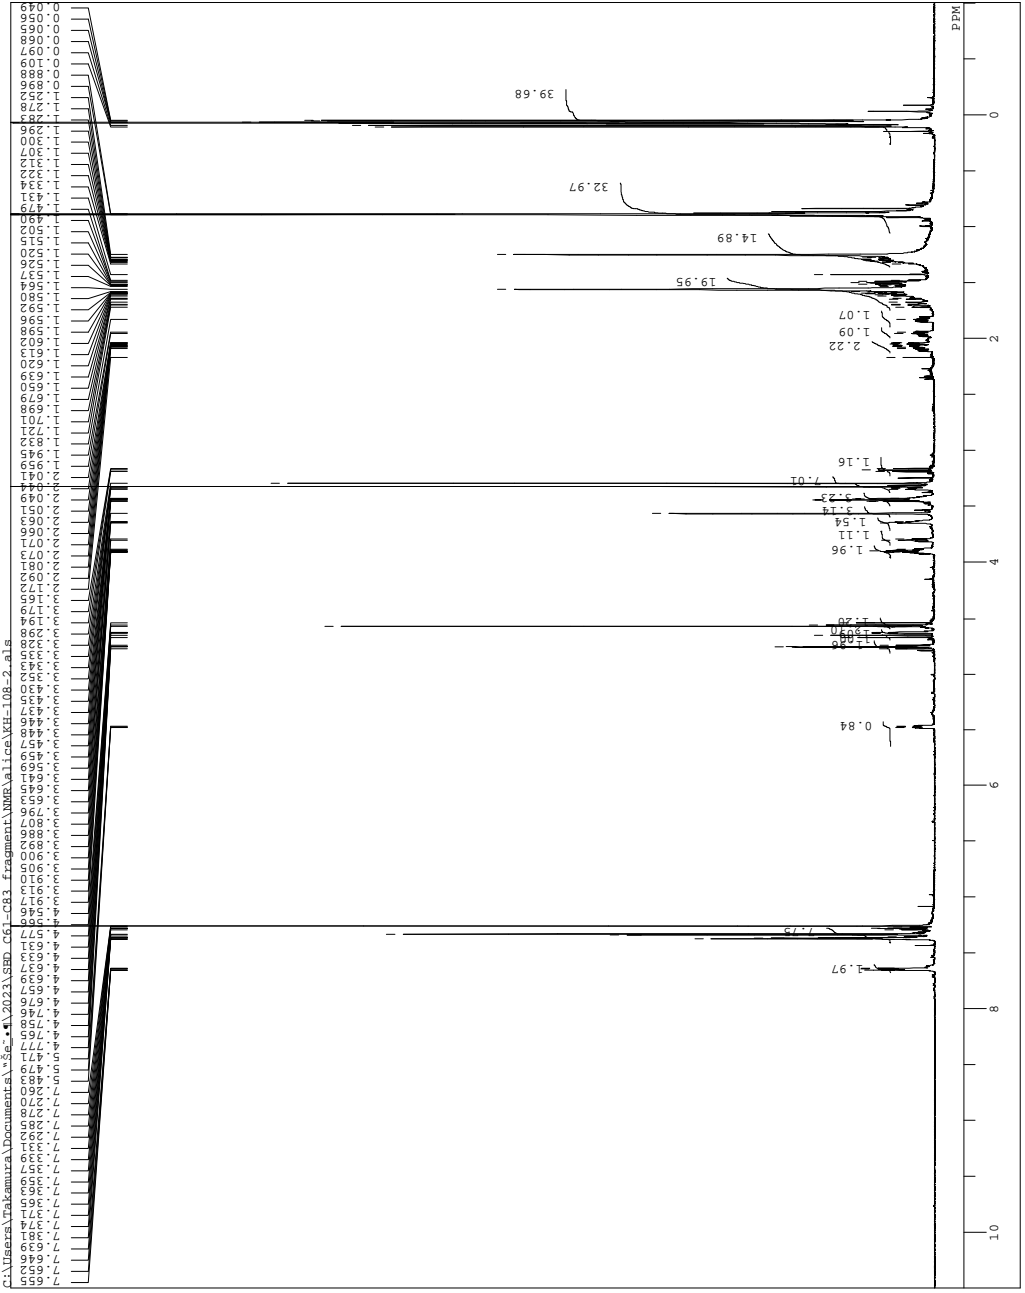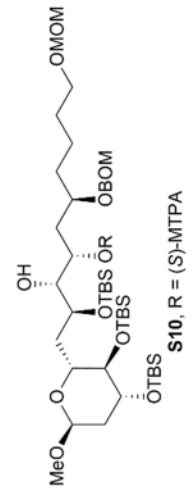

C:\Users\Takamura\Documents\Se-4\2023\SRD\_C61-C83\_fragments\NMR\all\c61\KH-108-2-13C\_als

DATE KH-108-2-13C\_als  
 TIME 18:57:10  
 DATE 2023-02-22 10:21:34  
 INSTR C13  
 PROC S2pul  
 P1 150.82 MHz  
 OBSF 6.72 MHz  
 OBPC 32768 Hz  
 DRT 37878.79 Hz  
 FREQ 0.864 sec  
 SCANS 2.1349 sec  
 PD CYM  
 PULPROG 5.75 usec  
 PM1  
 PRGNAME caci13  
 PROC 25.0 c  
 TRF  
 SFT 77.00 ppm  
 EX 0.160 Hz  
 EPGF1  
 SFTV1  
 RGAIN

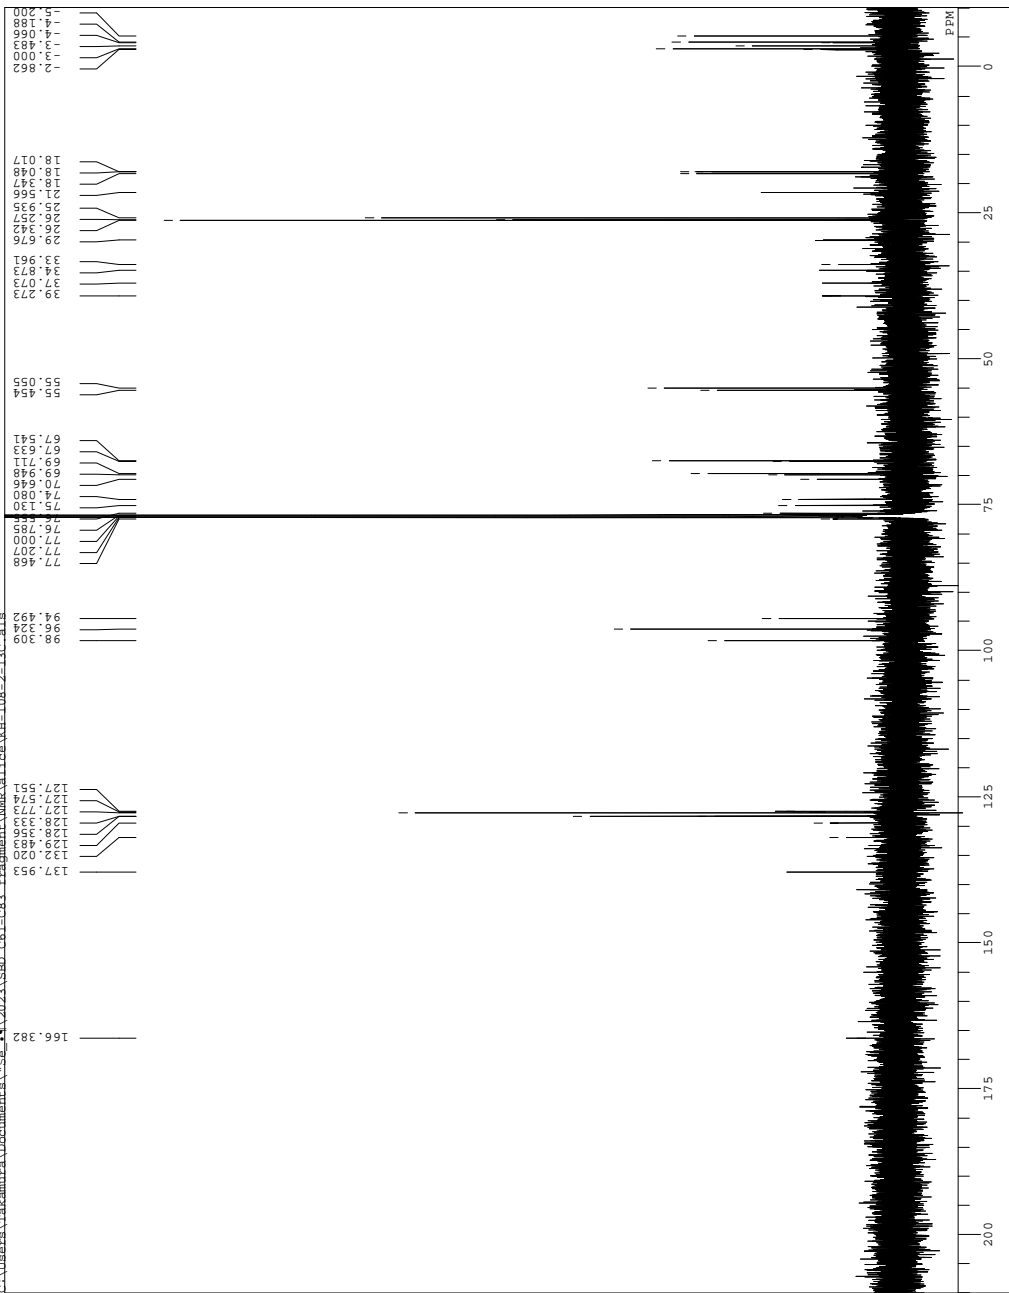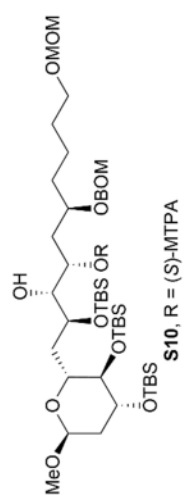

C:\Users\Takahara\Documents\4-8-2023\SED\_061\_C03\_Fragment\MMR\all\ca\KH-109-2-1H\_als

```

FILE KH-109-2-1H_als
COM1 KH-109-2-1H_Data
CONTC 020-02-15 10:09:25
PRG 2
EXMOD s2pul
OBPQ 599.76 MHz
OBP 0.60 Hz
OBF 0.60 Hz
POINT 9632768 Hz
SCANS 32
ACQTM 3.4079 sec
PD 1.5921 sec
PUL 5.25 usec
IRNUC
CTEMP 25.0 c
EXPEF cdc13
BF 7.26 ppm
RGAIN 0.12 Hz
40

```

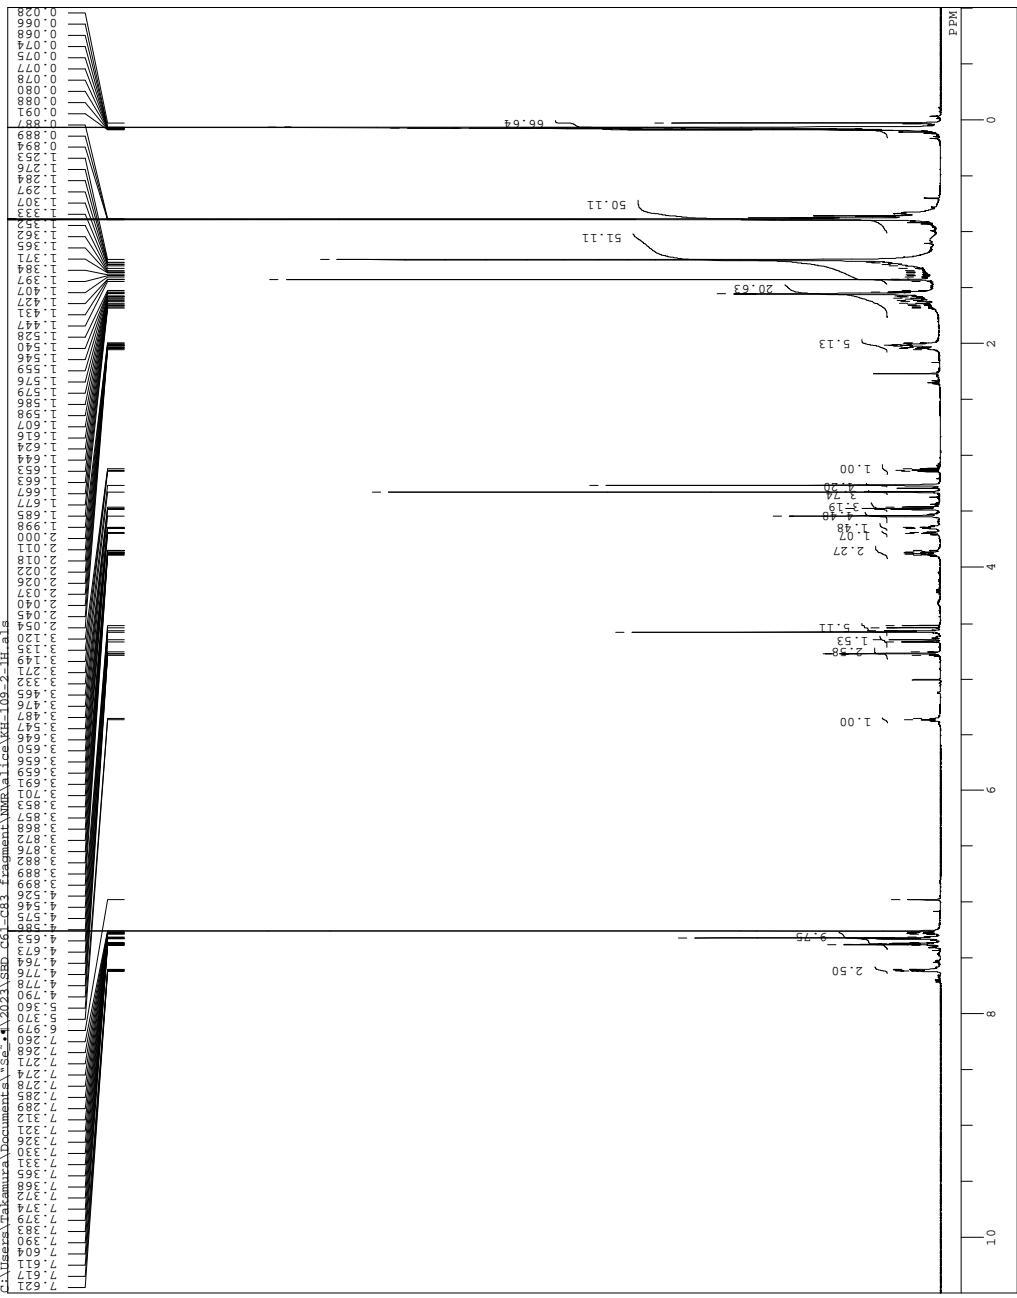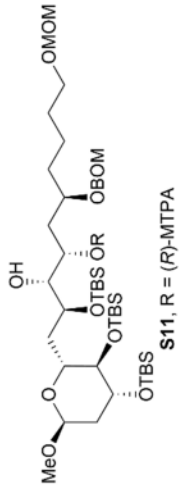

C:\Users\Takamura\Documents\Se\*\2023\SRD\_G61-G83\_Fragment\NMR\all\ca\KH-109-2-13C-re-als

DEFILE KH-109-2-13C-re-als  
 COMPT KH-109-2-13C  
 ONVIC C13-03-31 23:26:24  
 EXMOD s2pul 156.82 MHz  
 OBSFO 8.70 Hz  
 POINT 37876.64 Hz  
 SCANS 0.8651 sec  
 ACQTM 2.610 ssec  
 PUL 6.10 ssec  
 IRNUC cdcl3 83.0 c  
 STPM 77.00 ppm  
 EXREF 0.12 Hz  
 RF 60  
 RGAIN

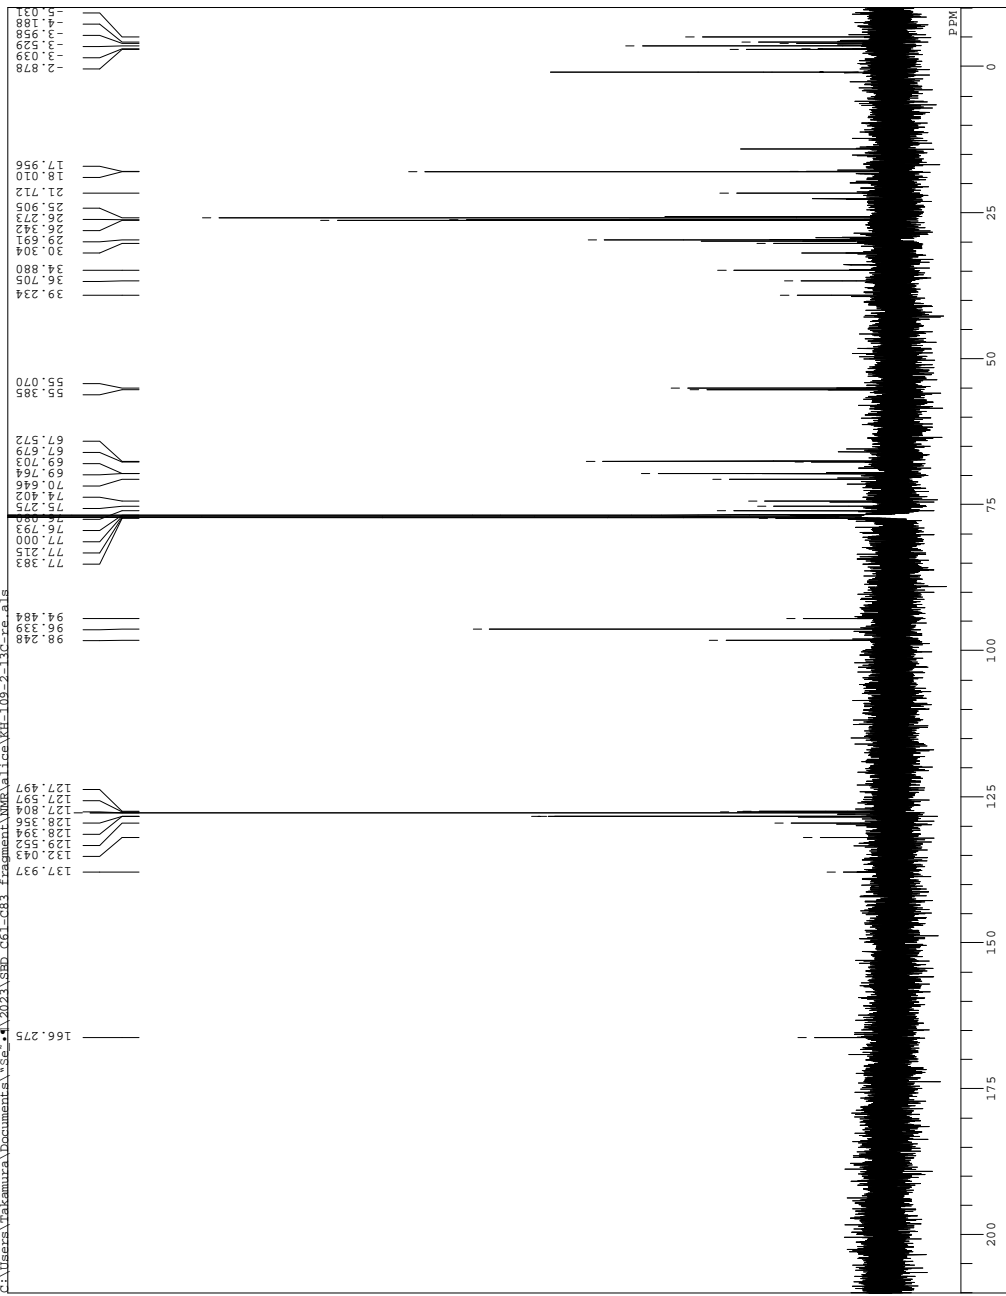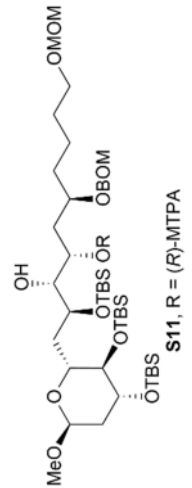

C:\Users\Takamura\Documents\Se-4\2021\88D\_661-c81\_fragment\MSX\114-1H\_als  
 DEPT 135 114-1H\_als  
 F2 114-1H\_als  
 DATE\_ 2019-12-13 12:13:28  
 TIME 12:13:28  
 ORNVC H1  
 EXPNO 2  
 PROCNO s2pul 399.91 MHz  
 RESOL 1.99 KHz  
 ORF1N 2.00 Hz  
 FREQ0 6410.26 Hz  
 SCANS 32  
 PCYTM 1.5000 sec  
 PM1 7.25 usec  
 PM2  
 PM3  
 TENDC 30.0 c  
 SLOPE  
 SILVNT cdcl3  
 EXREF 7.26 ppm  
 RGAIN 0.42

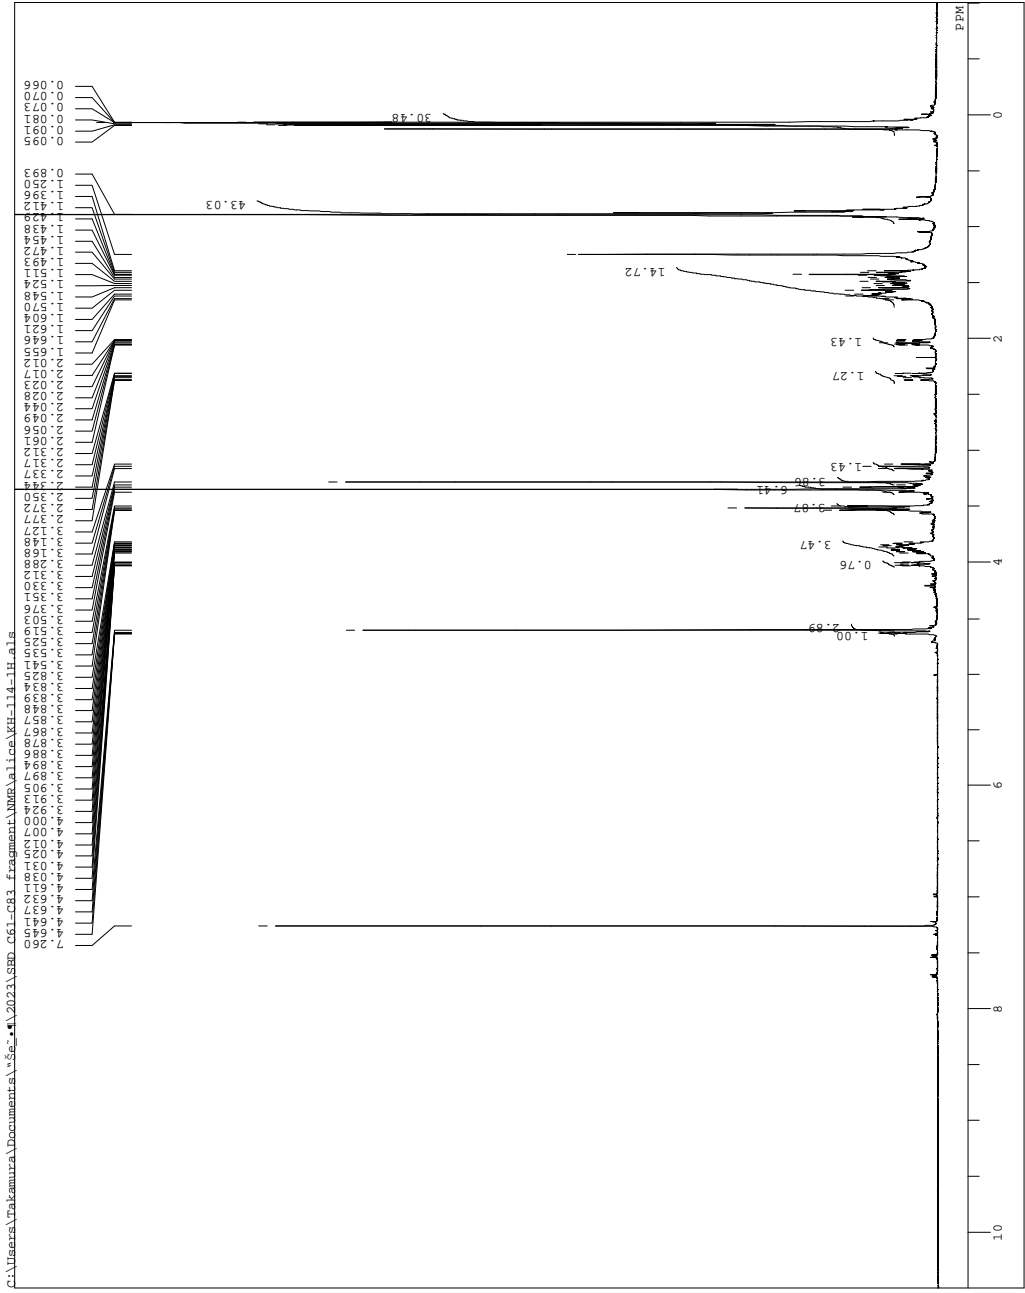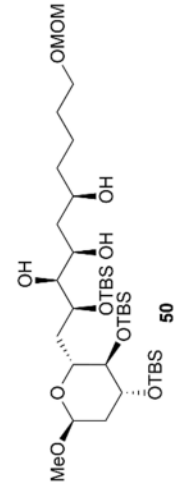



C:\Users\Yakamura\Documents\Se...2023\8BD\_061\_c83\_fragment\NMR\data\KH-114-13C\_als  
 Date\_ KH-114-13C\_als  
 Time 12:13:23  
 Date\_ 2019-12-13 12:21:49  
 Name\_ C13  
 OBNC C13  
 EXPNO 2  
 PROCNO 2  
 F2 100.62 MHz  
 F3 100.62 MHz  
 OBPRG 100.56 MHz  
 OBSF1 8.40 KHz  
 OBSF2 8.40 KHz  
 OBSF3 8.40 KHz  
 FREQD 250000.00 Hz  
 FREQD2 250000.00 Hz  
 SCANS 1  
 PC 1.64  
 PC2 1.6803 sec  
 PC3 5.90 usec  
 PULPROG zgpg30  
 PWD 1.00  
 PMW 1.00  
 L1 100.62 MHz  
 L2 100.62 MHz  
 L3 100.62 MHz  
 SFO 100.62 MHz  
 SOLVENT cdcl3  
 T1 77.00 sec  
 T2 77.00 sec  
 EXPT 77.00 sec  
 ACQ 77.00 sec  
 RGAIN 0.54 Hz

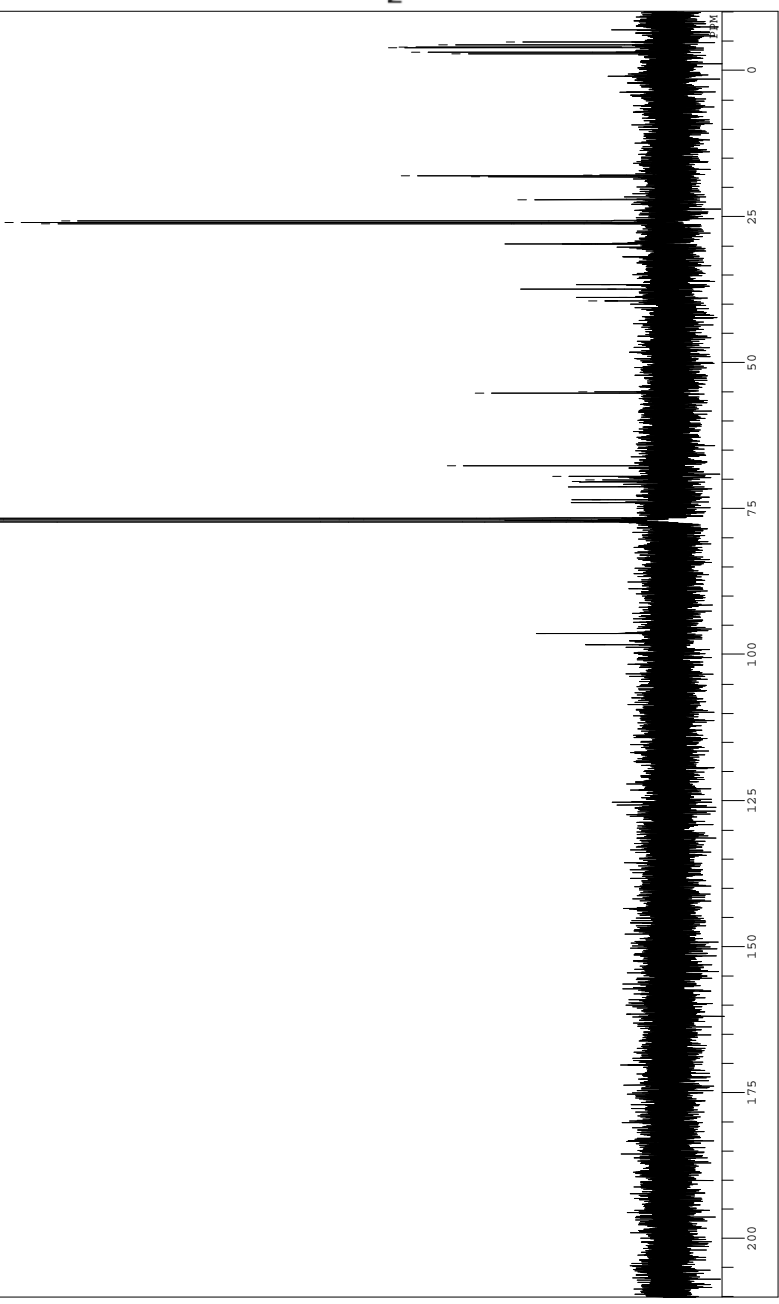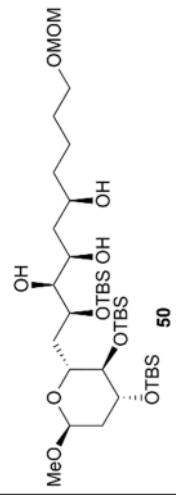

C:\Users\Takamura\Documents\Se-4\2021\SHD\_661-G31\_Fragment\NMR\1ca\KH-125-1H\_als

FILE KH-125-1H\_als  
 Conv 20201127 20:56:43  
 COM 1  
 ORNUC H1  
 ES 2  
 EXMOD s2pul  
 OBSF1 599.76 MHz  
 OBSF2 7.42 KHz  
 OBSF3 3.60 Hz  
 PFGM1 9635.38 Hz  
 PFGM2  
 SCANS 32  
 ACQTM 3.45079 sec  
 PUL 1.5.25 usec  
 INTC  
 IRTN 25.0 c  
 SFTN  
 SFTV cd3pd  
 EXREF 3.30 ppm  
 RGAIN 0.42 Hz  
 RAIN

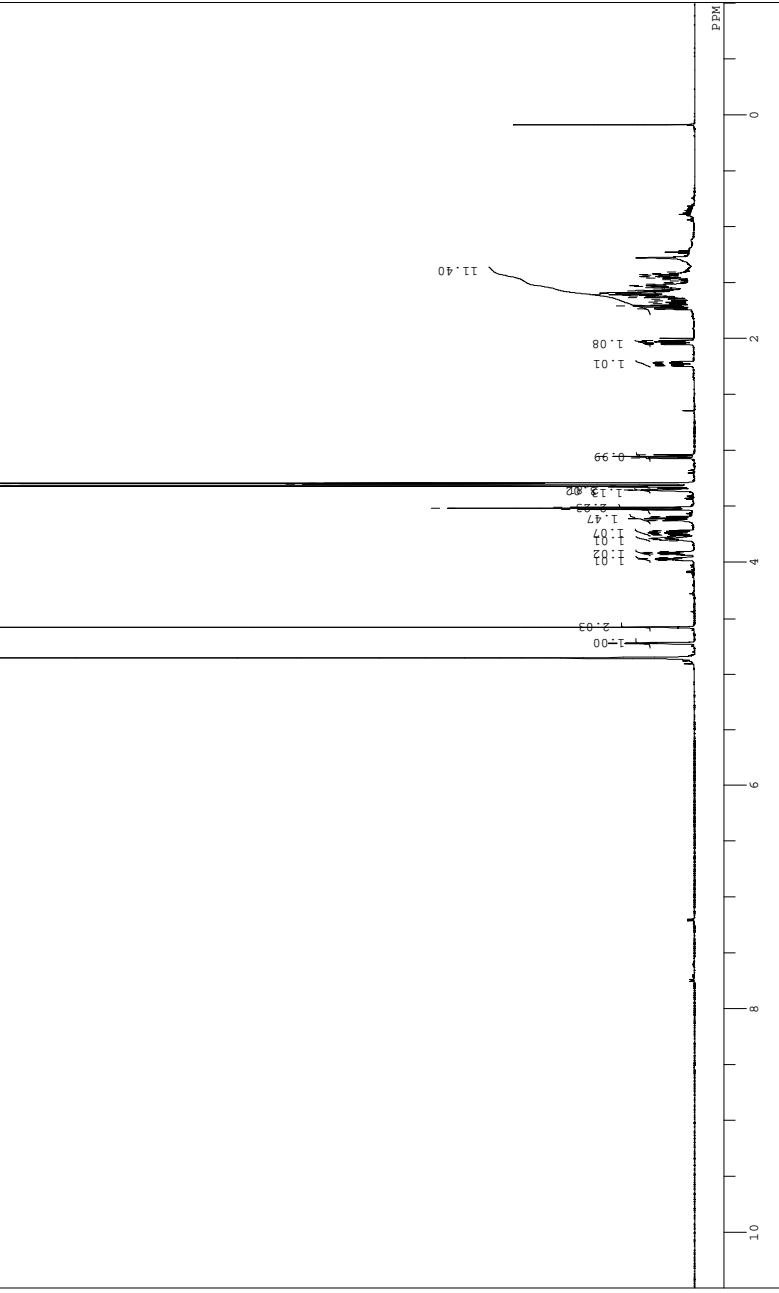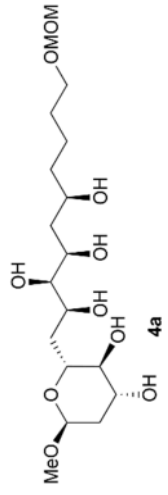

4a

C:\Users\Takamura\Documents\Se\*\2023\8RD\_061-C83\_fragment\NMR\125-13C\_als

DATE KH-125-13C\_als  
 TIME 11:13:18  
 DATE 2023-01-27 21:01:44  
 ORNU C13  
 PULPROG zgpg30  
 ACF0 s2pul  
 OBSFQ 150.82 MHz  
 OBSFZ 7.32 KHz  
 DWT 32768 Hz  
 DWIN 32768 Hz  
 FREQD 37878.79 Hz  
 SCANS 64  
 PD 0.864 sec  
 PDCY 2.1345 sec  
 PDEL 5.75 usec  
 PML C  
 TRM 25.0 C  
 TRMPC  
 TRMPP  
 SILVNT cd3od  
 EXPT 49.00 PPM  
 EXREF 0.160 Hz  
 RGAIN

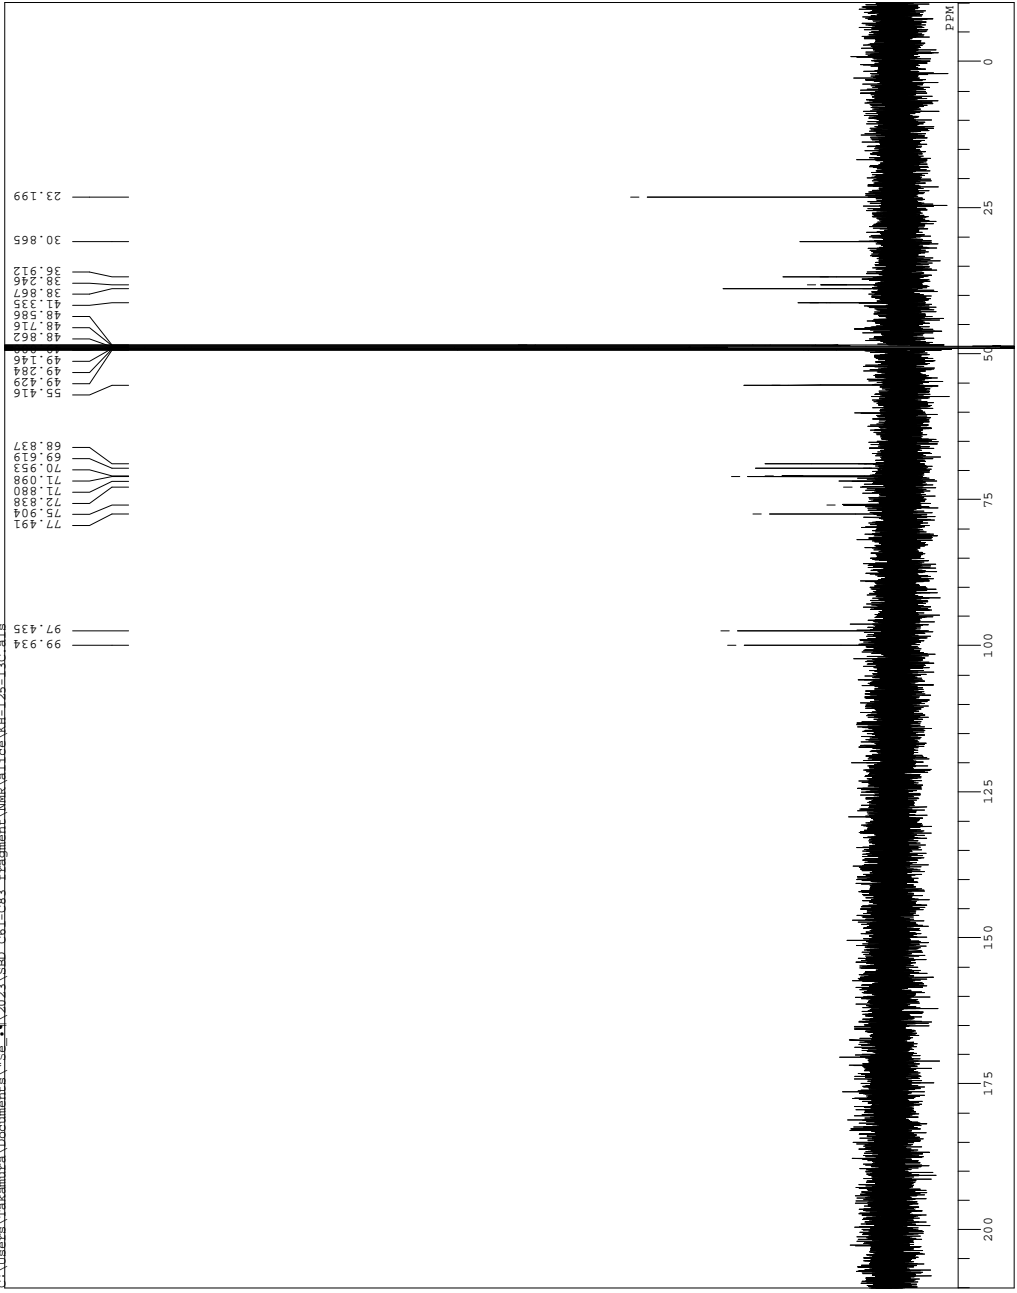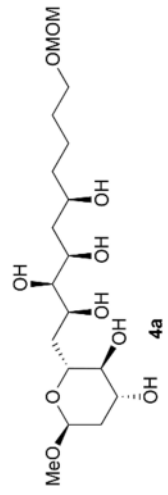

```

EX-125_Data
exp3 gCOSY
=====
NAME          PLAGE
date   Jan 27 2020   hr
solvent cdcl3
sample  6120
=====
ACQUISITION
pw          9115.4   temp      not used
pc          2155   shif1     not used
sp          2184   shif2     0
zb          4000   F2 PROGRMING  0
as          32   sb          -0.075
cl          1.000   sbw      not used
ct          14   fm          4096
=====
2D ACQUISITION
pw          9115.4   shif1     not used
pc          2155   shif2     not used
sp          2184   shif3     not used
=====
F2 F1
=====
F2 F1
=====
NAME          n          DISPLAY
-----
wt          -14.1
tm TRANSMITTER  n          sp          3075.1
w          599.787   wpl          3356.9
toF          599.7   rF1          3356.9
tpwr          59   rF2          3378.2
pw          10.500   rF3          3308.5
=====
GRABBER 1105
SOLVIE  0.001000   WC          351.9
KIDratio 1.000   WC          9.8
gpcTab  0.000500   wC3         208.9
=====
C13 VS
C13 VS          445
C13 VS          445
=====
SI   C13   4

```

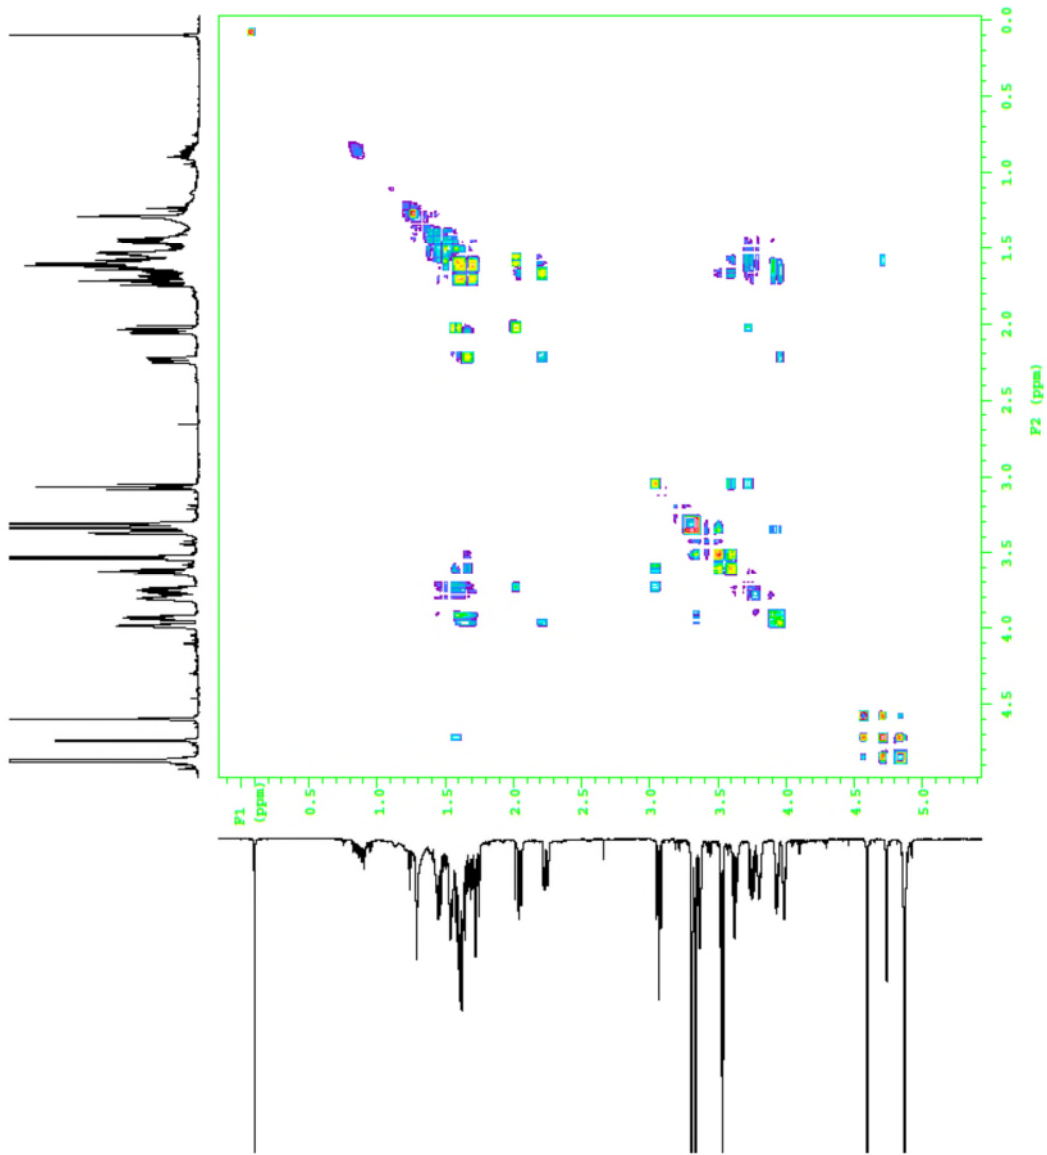

$^1\text{H}-^1\text{H}$  COSY (600 MHz,  $\text{CD}_3\text{OD}$ )

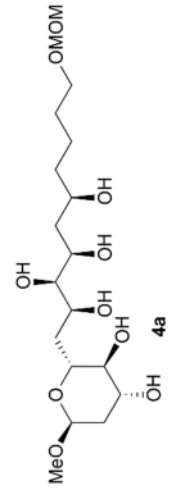



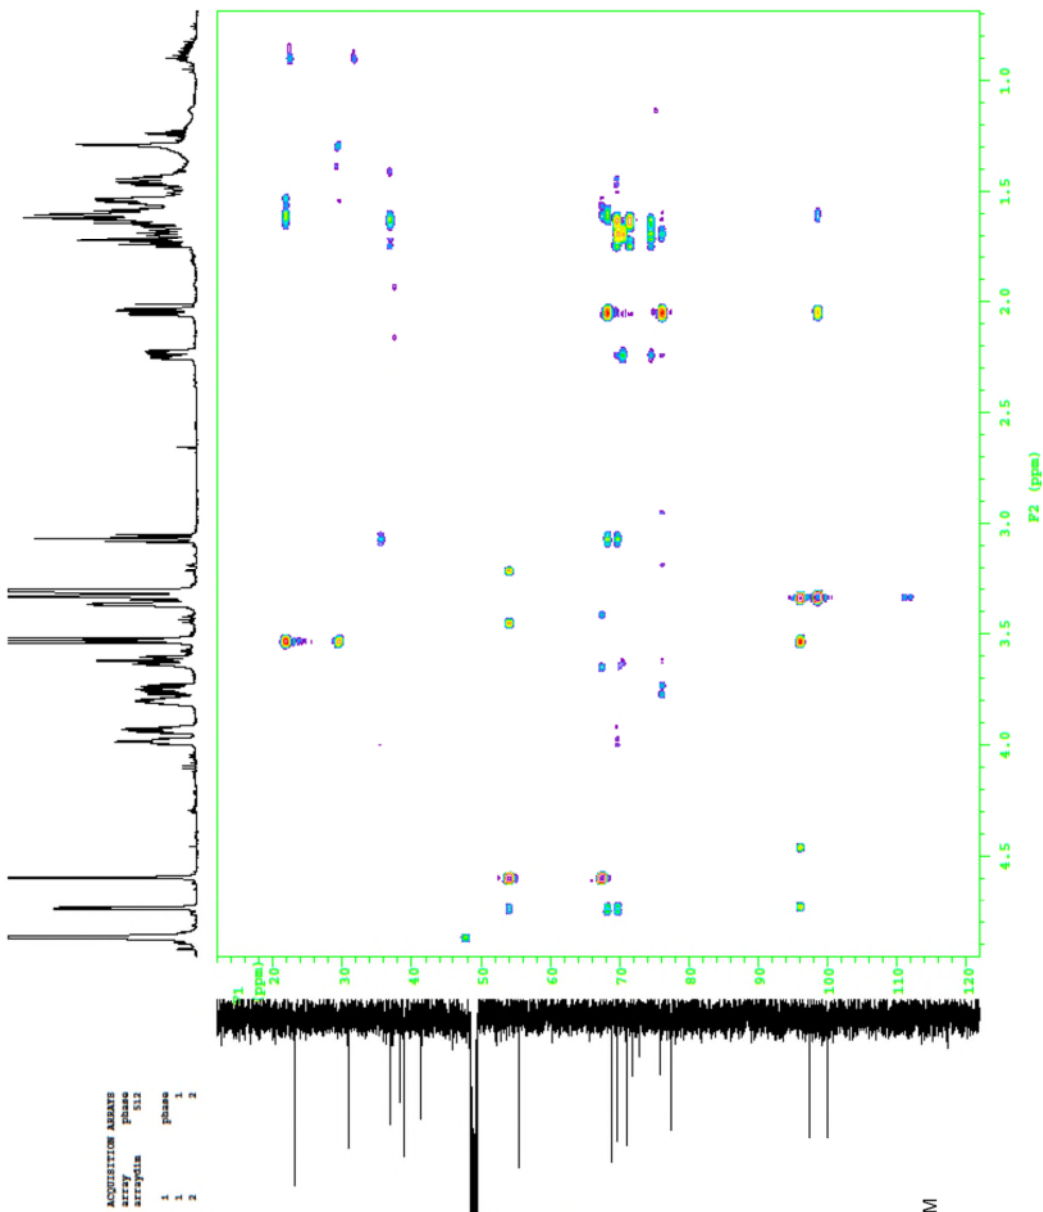

```

KE-135_Data
exp5 gsmc
ACQUISITION ARRAYS
date Jun 27 2020 hr 00 min
solvent cd3od
p1 7
arrayid 512
phase 1
array 1
phase 2
acq 9615.4 SPECIAL
at 0.150 temp not used
zb 2884 gain
zc 4000 ap1a
zd 1.00
ze 12 CHANNELS 500
zf 12 F1 0.001000
zg 12 F2 0.001000
2D ACQUISITION
sw1 36195.1 F1 1500
sw2 256 F2 256
phase arrayed
PROBHDATUM
nu1 -0.075
nu2 0.075
nu3 0.075
nu4 0.075
nu5 0.075
nu6 0.075
nu7 0.075
nu8 0.075
nu9 0.075
nu10 0.075
nu11 0.075
nu12 0.075
nu13 0.075
nu14 0.075
nu15 0.075
nu16 0.075
nu17 0.075
nu18 0.075
nu19 0.075
nu20 0.075
TRANSMITTER
tx 01 F1
sfrq 599.787 F1a1 not used
tuf 599.7 F1a1
tpr 59 F1a1
pwr 10.500 F1a1 DISPLAY 2048
P1 CHANNELS
dn 120000000 F1 413.9
dot 1542.4 F1a1 1800.9
dm 1542.4 F1a1 1800.9
dncvwrw M1a1 1305.9
dncf 31008 F1a1 2264.4
dncf 31008 F1a1 2264.4
p1a1 55 F1a1
pwr 12.100 F1a1 PLOT
j1a3 146.0 ac 9.8
j1a4 81.0 wcd 208.9
wcd 81.0
wcd 132
ts 12
a1 cd3 od 37

```

HMBC (600 MHz, CD<sub>3</sub>OD)

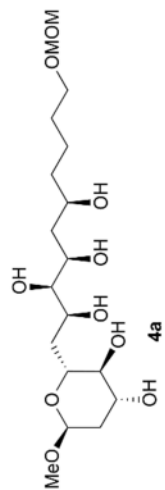

C:\Users\Takamura\Documents\Se\_\*\2021\GSD\_661-c83\_fragment\NMR\1h\caXH-156-1H.als

DETE KH-156-1H.als  
VOP 2020-02-04 21:01:36  
DATE 2020-02-04 21:01:36  
DIR H1  
NAME s2pul  
PULPROG 599.76 MHz  
PROBHD 7.42 KHz  
PULPROG 3.60 Hz  
PROCNO 9615.98 Hz  
FREQ 9615.98 Hz  
SCANS 32  
PCYCLE 3.48 sec  
PCYCLE 1.5921 sec  
PCYCLE 5.25 usec  
PWI 25.0 c  
IRMSQ 3.30 pfm  
SOLVENT cd3od  
EXREF 0.46 Hz  
RGAIN

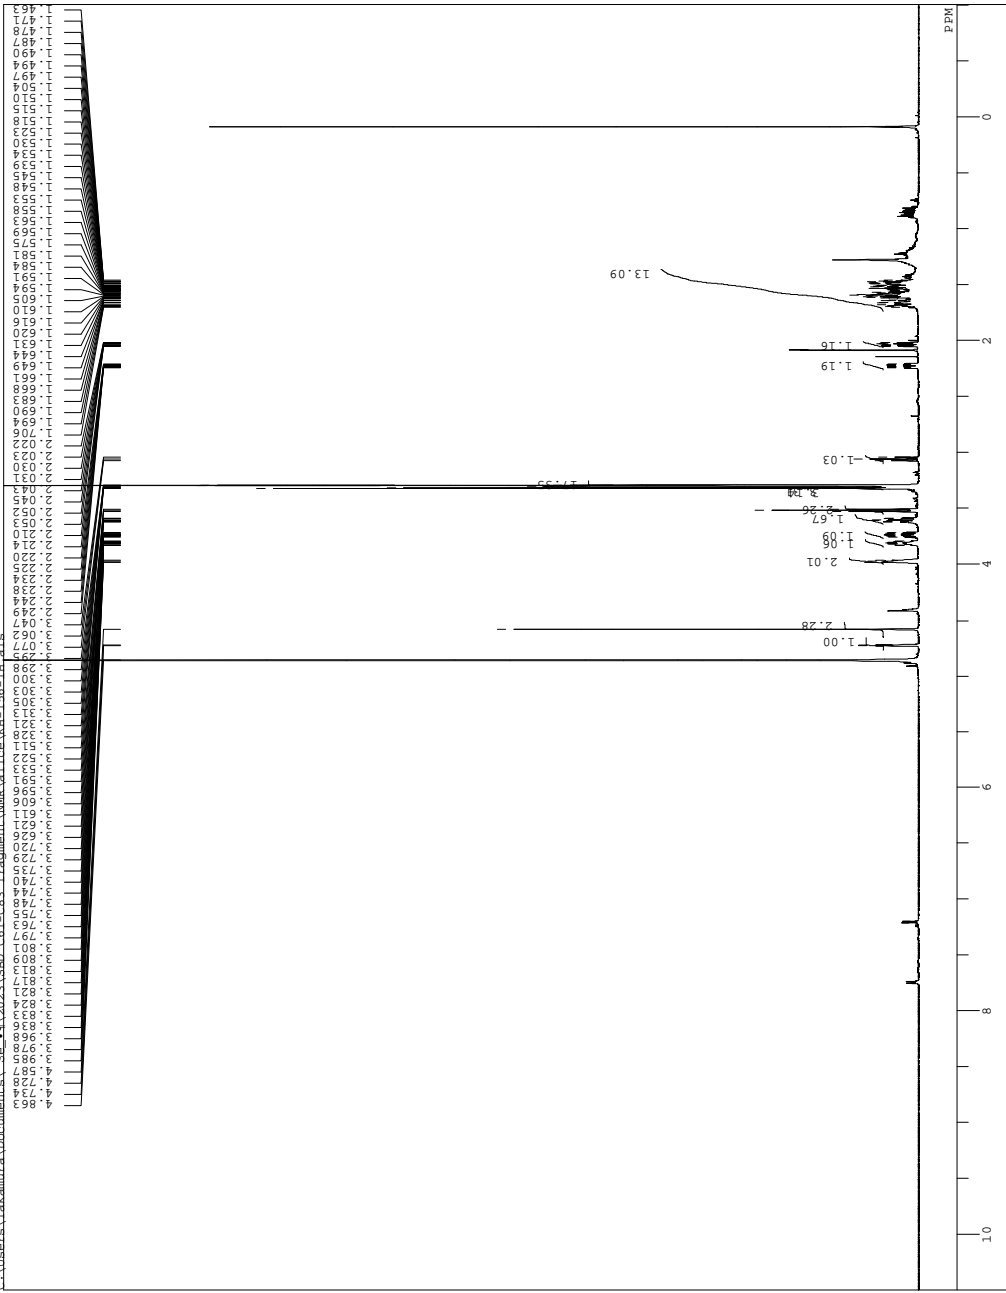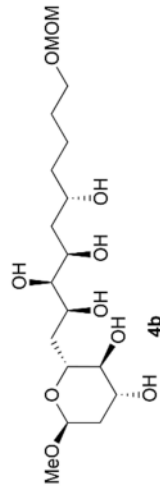

C:\Users\Takamura\Documents\Se\_\*\2021\SRD\_061-c83\_fragment\NMR\data\KH-156-13c\_als

```

DEFILE KH-156-13c.als
COMP  20200204
ORIG  20200204 21:05:40
PROC  C13
EXMOD  s2pul
PULSE  150.82 KHz
PROG  3.00 Hz
OBFTN  3787879 Hz
PCPD  64
SCANS  0.8631 sec
ACQTM  2.575 usec
RES  0.12 Hz
PWL  25.0 c
IRMUC  49.00 PPM
SOLNT  cd3od
SUN  0.12 Hz
EXREF  0.00 PPM
RGAIN  0.00
  
```

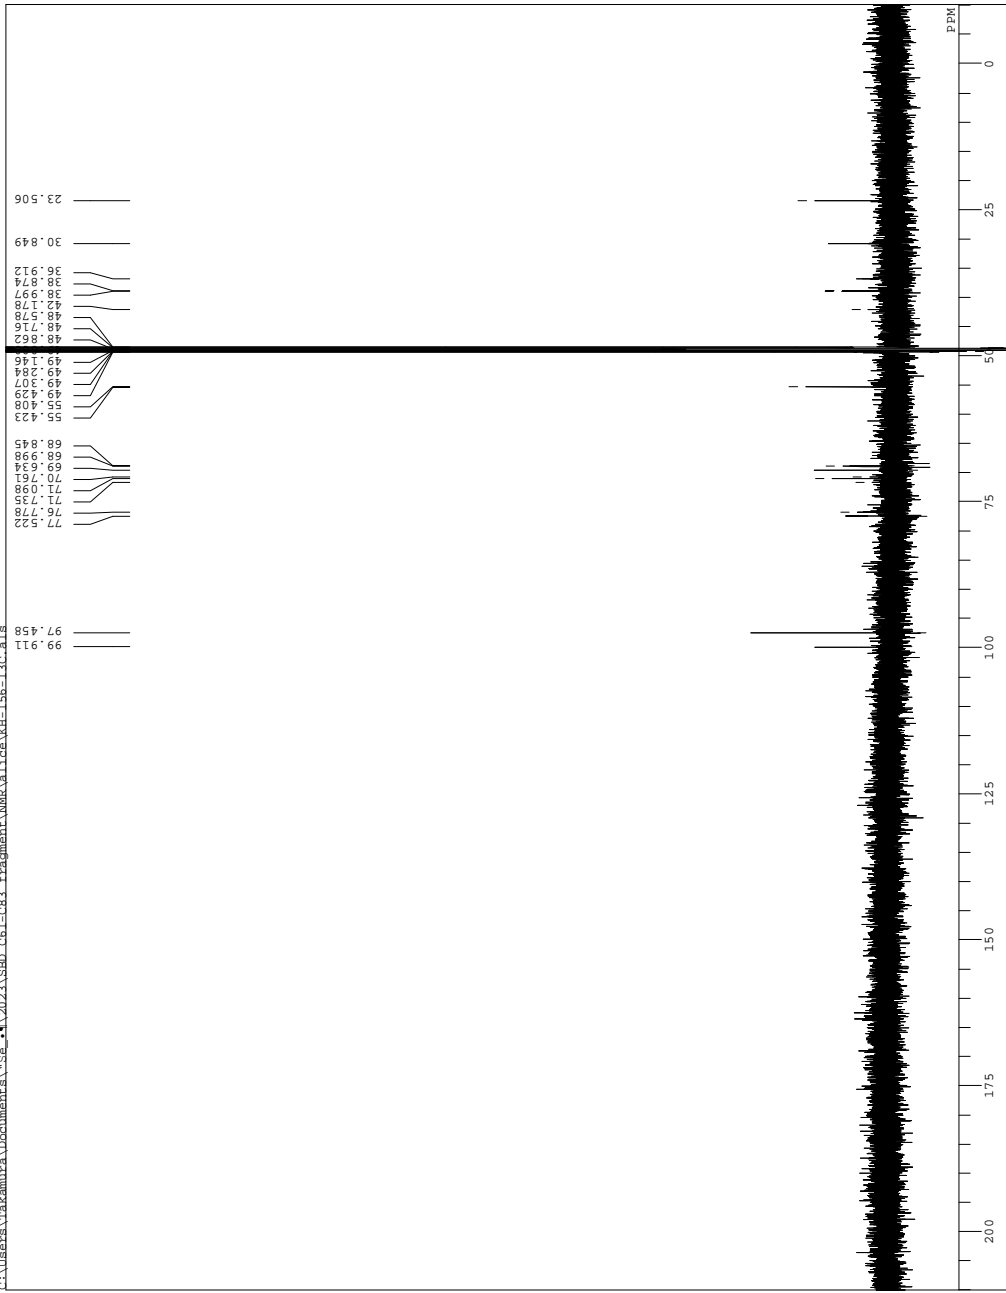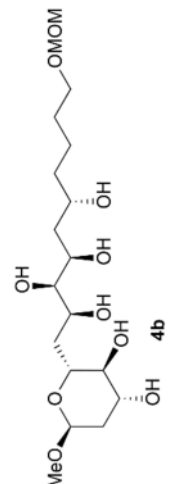



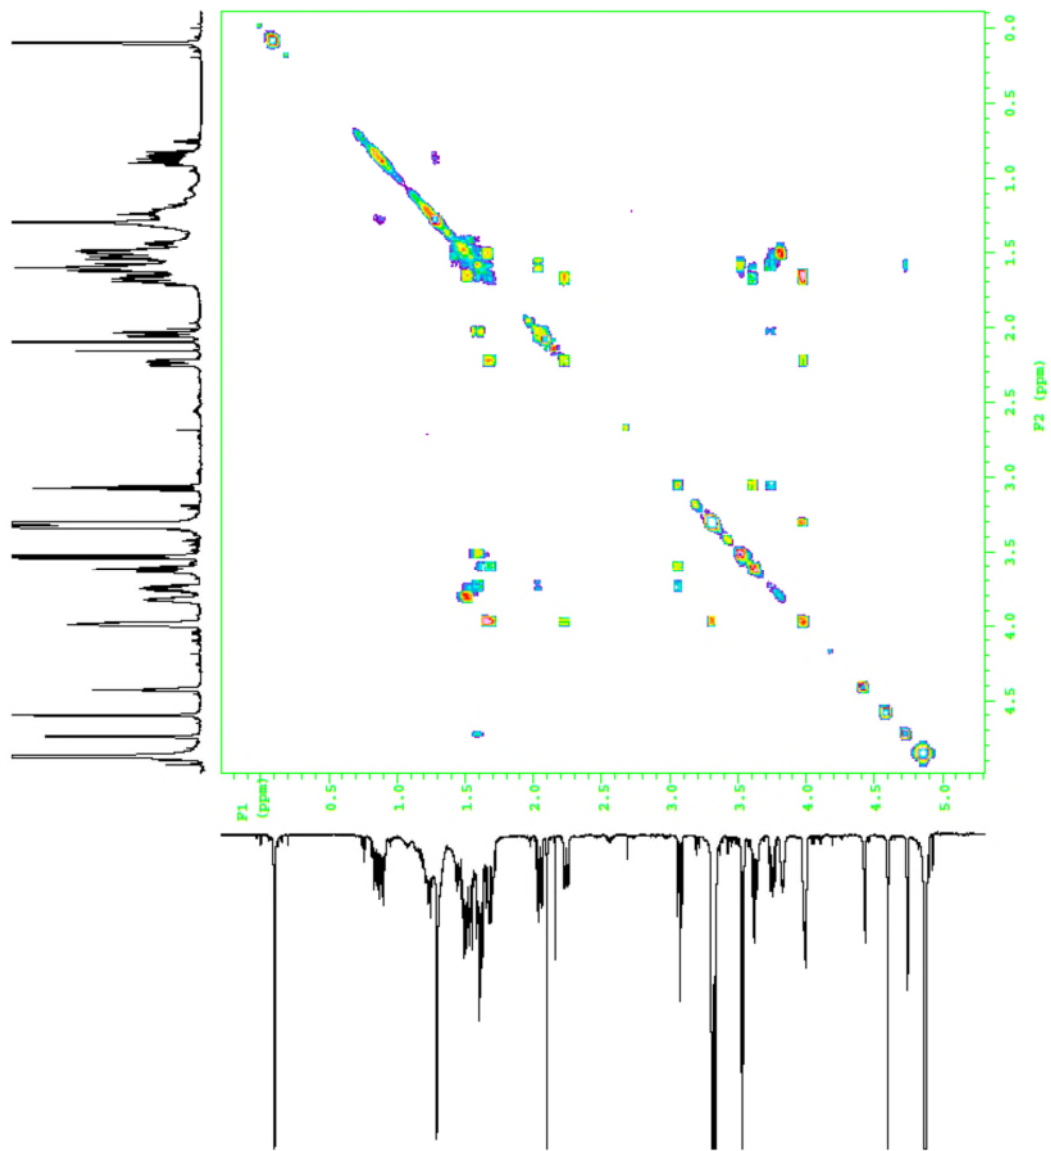

```

EX-156-1E_Data
exp) gcosy
=====
NAME      SAMPLE          FLAG
date     Feb  4 2015      m
solvent  CD3OD                m
sample   6130                 m
ACQUISITION
=====
acq       9415.4 temp not used
at        2884 spm          46
ap        4950             20
aq        12             0
al        1.000 sde       not used
dt        16             16
=====
2D ACQUISITION  F1 PROCESSED
=====
wv       9415.4  sol       -0.027
al        256  shsa1  not used
c1         0    f2proc  4094
=====
PREPARATION  n    DISPLAY
=====
wt        n    sp       -83.9
=====
TRANSMITTER  wp       3651.8
tx            RI     sp     -173.9
afiq       539.767  wpl     3356.3
tqc        579.9    fil     3379.1
pwr        10.500  ffil    3380.1
p#         GRADIENTS  fqa1    1979.2
=====
GALVAN     5102      PLOT   351.9
GBR        0.001000  WC
kdratio    1.000   ac       9.8
spread     #160500  wds    286.3
=====
ON          CLK  W         286.4
OM          MM  W         16.4
=====
SI  OBS   BY
=====

```

<sup>1</sup>H-<sup>1</sup>H COSY (600 MHz, CD<sub>3</sub>OD)

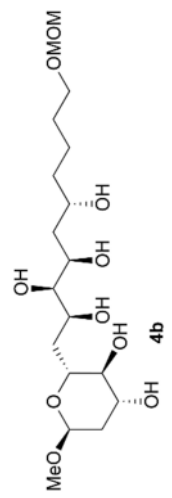

```

XR-156-1E_Data
emp3 gMQC
=====
Date_  Sub  4  2020  ha
Solvent_ cd3od
Sample_
Acquisition_ 6120
=====
ac  9433.4  SPCIAL  1  phase
sc  0.150  temp  not used  1  1
st  1200  SPC  20
rs  4000  SPC  20
=====
ss  32  GRADIENTS  0
dl  1.000  SVAIR  5102
nt  32  GC  0.002000
=====
2D ACQUISITION_  KRatio  3.977
wt  2166.0  SPC  0.16000
st  2100  SPC  20
rs  2100  SPC  20
=====
Phase_  arrayed  gf  0.069
Pulsation_  gfs  not used
suzsoda_  n  fn  4096
wt  10.500  sp  -19.1
=====
TRANSMITTER  n1  SFL  0.007
tx  598.747  SPC  20
=====
f1  599.7  F1  2048
=====
pw  10.500  sp  -19.1
=====
dc  1983.4  SPC  2901.5
de  -2192.0  SPC  1849.4
df  3188.9  SPC  13186.9
=====
deconvolve  W40  compare  rFD  1979.2
dat  31008  rFD  8731.6
=====
qpcw  48  rFD  7389.7
pccw  56
=====
poc  13.100  w  351.9
=====
j13c  146.0  W  208.0
sol13c  y  s2  0
mult  2  vs  286
=====
al  ods  ph  2

```

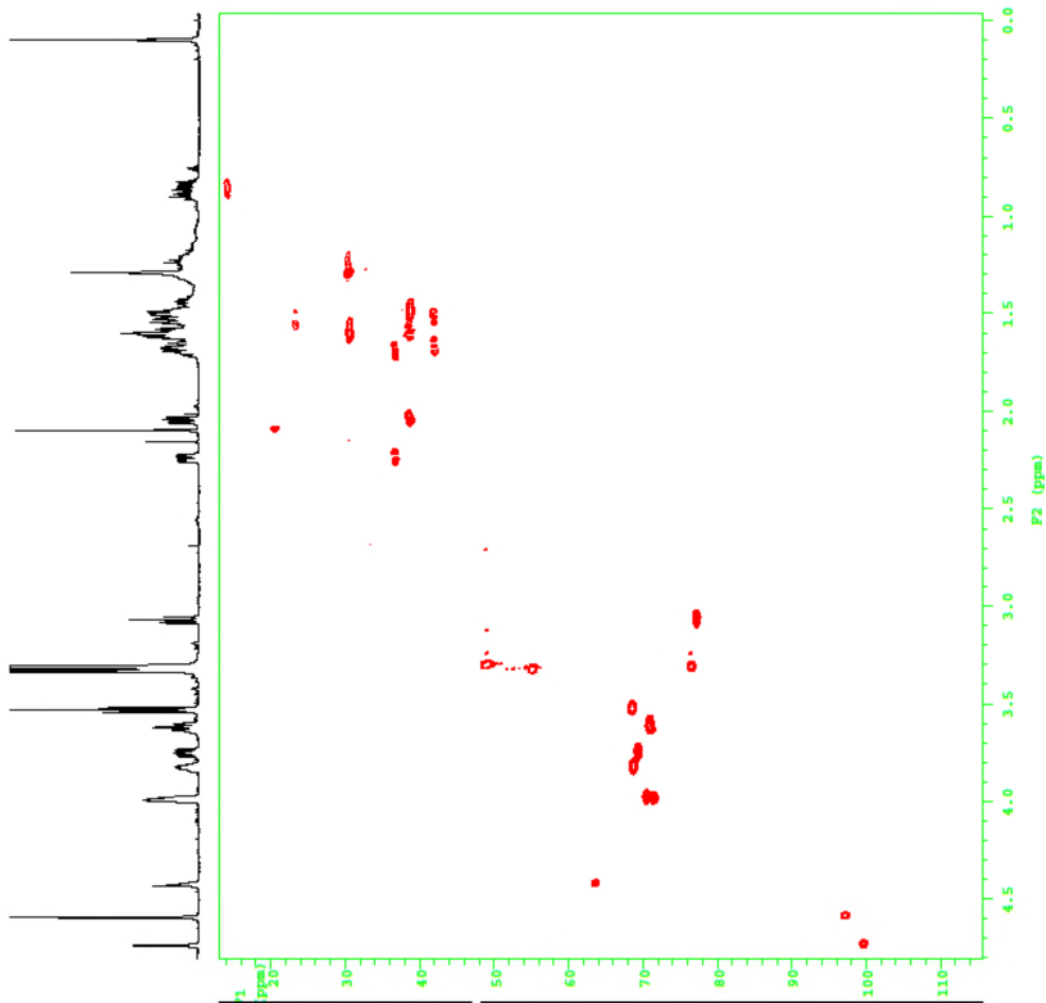

HMQC (600 MHz, CD<sub>3</sub>OD)

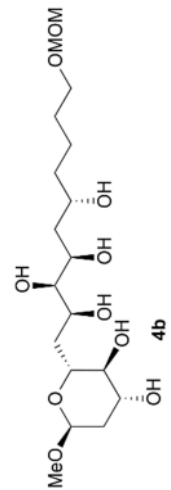

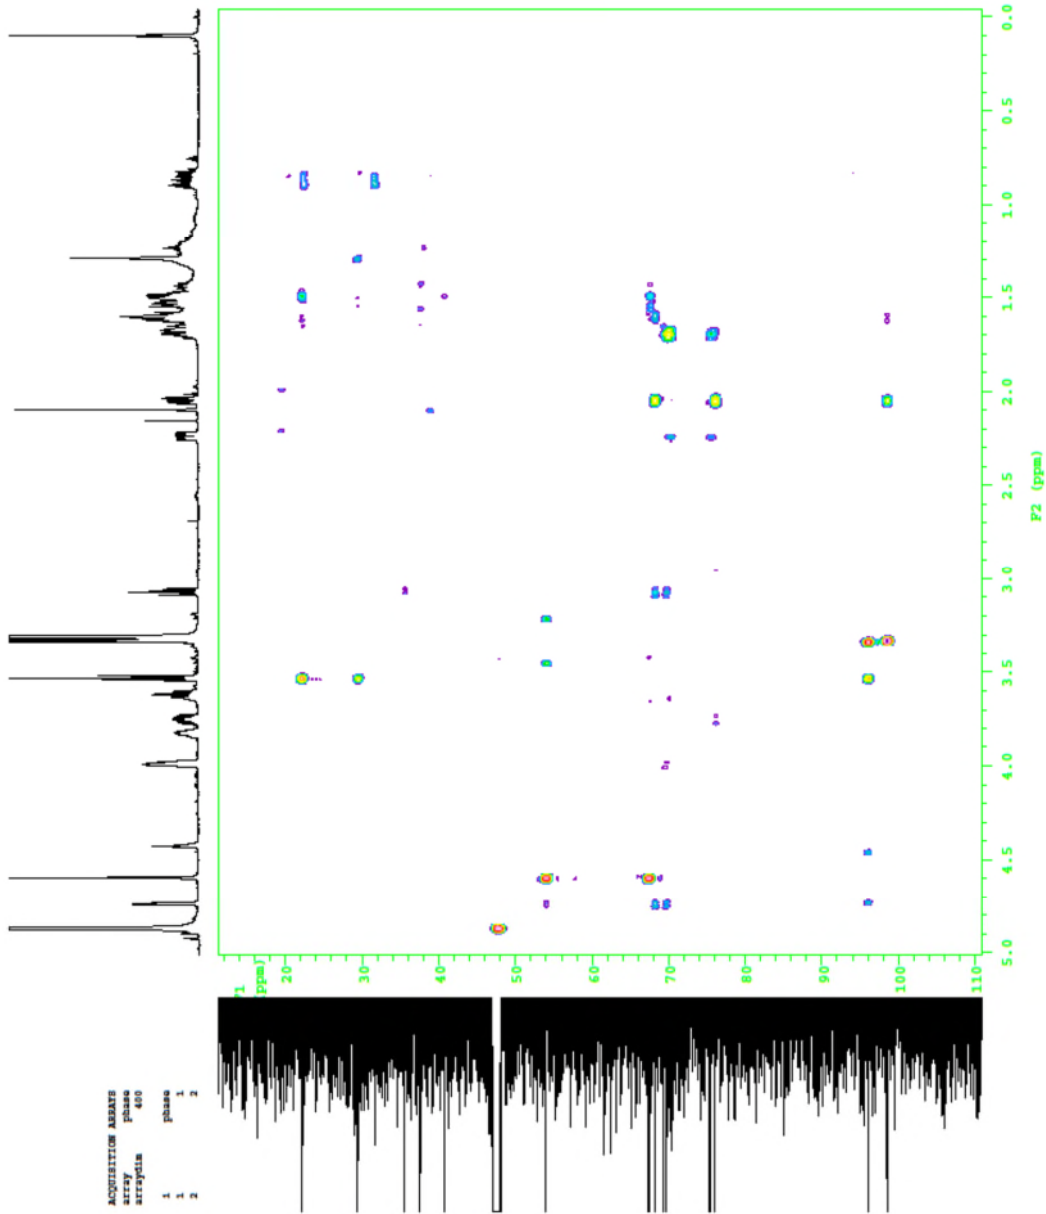

```

EX-186-18_Data
exp4 gsmc
ACQUISITION PARAMETERS
NAME 4 2020 ha
SOLVENT cd3od
ACQUISITION 6120
SPECIAL
TEMP not used
PULPROG zgpg30
DELTA 4.000
DELTA2 0
DELTA3 0
GRADIENTS 32
G1 1.800 g1v11 500
G2 32 g11 0.001000
2D ACQUISITION g1v13 1500
WEIGHT 36199.1 g1v13 0.001000
PROBHD 5mm QNP1H1
PHASE STRIP04 F2 PROCESSING
PREPARATION ad -0.075
SOLVENTS n ohc not used
WEIGHTS n in 4096
TRANSMITTER n f1 PROCESSING
PULPROG zgpg30
DELTA 5.997 del not used
DELTA2 5.997 g1v13 10
TYPE 59 f11 2048
P1 10.500
P2 DISPLAY
P3
P4
P5
P6
P7
P8
P9
P10
P11
P12
P13
P14
P15
P16
P17
P18
P19
P20
P21
P22
P23
P24
P25
P26
P27
P28
P29
P30
P31
P32
P33
P34
P35
P36
P37
P38
P39
P40
P41
P42
P43
P44
P45
P46
P47
P48
P49
P50
P51
P52
P53
P54
P55
P56
P57
P58
P59
P60
P61
P62
P63
P64
P65
P66
P67
P68
P69
P70
P71
P72
P73
P74
P75
P76
P77
P78
P79
P80
P81
P82
P83
P84
P85
P86
P87
P88
P89
P90
P91
P92
P93
P94
P95
P96
P97
P98
P99
P100
P101
P102
P103
P104
P105
P106
P107
P108
P109
P110
P111
P112
P113
P114
P115
P116
P117
P118
P119
P120
P121
P122
P123
P124
P125
P126
P127
P128
P129
P130
P131
P132
P133
P134
P135
P136
P137
P138
P139
P140
P141
P142
P143
P144
P145
P146
P147
P148
P149
P150
P151
P152
P153
P154
P155
P156
P157
P158
P159
P160
P161
P162
P163
P164
P165
P166
P167
P168
P169
P170
P171
P172
P173
P174
P175
P176
P177
P178
P179
P180
P181
P182
P183
P184
P185
P186
P187
P188
P189
P190
P191
P192
P193
P194
P195
P196
P197
P198
P199
P200
P201
P202
P203
P204
P205
P206
P207
P208
P209
P210
P211
P212
P213
P214
P215
P216
P217
P218
P219
P220
P221
P222
P223
P224
P225
P226
P227
P228
P229
P230
P231
P232
P233
P234
P235
P236
P237
P238
P239
P240
P241
P242
P243
P244
P245
P246
P247
P248
P249
P250
P251
P252
P253
P254
P255
P256
P257
P258
P259
P260
P261
P262
P263
P264
P265
P266
P267
P268
P269
P270
P271
P272
P273
P274
P275
P276
P277
P278
P279
P280
P281
P282
P283
P284
P285
P286
P287
P288
P289
P290
P291
P292
P293
P294
P295
P296
P297
P298
P299
P300
P301
P302
P303
P304
P305
P306
P307
P308
P309
P310
P311
P312
P313
P314
P315
P316
P317
P318
P319
P320
P321
P322
P323
P324
P325
P326
P327
P328
P329
P330
P331
P332
P333
P334
P335
P336
P337
P338
P339
P340
P341
P342
P343
P344
P345
P346
P347
P348
P349
P350
P351
P352
P353
P354
P355
P356
P357
P358
P359
P360
P361
P362
P363
P364
P365
P366
P367
P368
P369
P370
P371
P372
P373
P374
P375
P376
P377
P378
P379
P380
P381
P382
P383
P384
P385
P386
P387
P388
P389
P390
P391
P392
P393
P394
P395
P396
P397
P398
P399
P400
P401
P402
P403
P404
P405
P406
P407
P408
P409
P410
P411
P412
P413
P414
P415
P416
P417
P418
P419
P420
P421
P422
P423
P424
P425
P426
P427
P428
P429
P430
P431
P432
P433
P434
P435
P436
P437
P438
P439
P440
P441
P442
P443
P444
P445
P446
P447
P448
P449
P450
P451
P452
P453
P454
P455
P456
P457
P458
P459
P460
P461
P462
P463
P464
P465
P466
P467
P468
P469
P470
P471
P472
P473
P474
P475
P476
P477
P478
P479
P480
P481
P482
P483
P484
P485
P486
P487
P488
P489
P490
P491
P492
P493
P494
P495
P496
P497
P498
P499
P500
P501
P502
P503
P504
P505
P506
P507
P508
P509
P510
P511
P512
P513
P514
P515
P516
P517
P518
P519
P520
P521
P522
P523
P524
P525
P526
P527
P528
P529
P530
P531
P532
P533
P534
P535
P536
P537
P538
P539
P540
P541
P542
P543
P544
P545
P546
P547
P548
P549
P550
P551
P552
P553
P554
P555
P556
P557
P558
P559
P560
P561
P562
P563
P564
P565
P566
P567
P568
P569
P570
P571
P572
P573
P574
P575
P576
P577
P578
P579
P580
P581
P582
P583
P584
P585
P586
P587
P588
P589
P590
P591
P592
P593
P594
P595
P596
P597
P598
P599
P600
P601
P602
P603
P604
P605
P606
P607
P608
P609
P610
P611
P612
P613
P614
P615
P616
P617
P618
P619
P620
P621
P622
P623
P624
P625
P626
P627
P628
P629
P630
P631
P632
P633
P634
P635
P636
P637
P638
P639
P640
P641
P642
P643
P644
P645
P646
P647
P648
P649
P650
P651
P652
P653
P654
P655
P656
P657
P658
P659
P660
P661
P662
P663
P664
P665
P666
P667
P668
P669
P670
P671
P672
P673
P674
P675
P676
P677
P678
P679
P680
P681
P682
P683
P684
P685
P686
P687
P688
P689
P690
P691
P692
P693
P694
P695
P696
P697
P698
P699
P700
P701
P702
P703
P704
P705
P706
P707
P708
P709
P710
P711
P712
P713
P714
P715
P716
P717
P718
P719
P720
P721
P722
P723
P724
P725
P726
P727
P728
P729
P730
P731
P732
P733
P734
P735
P736
P737
P738
P739
P740
P741
P742
P743
P744
P745
P746
P747
P748
P749
P750
P751
P752
P753
P754
P755
P756
P757
P758
P759
P760
P761
P762
P763
P764
P765
P766
P767
P768
P769
P770
P771
P772
P773
P774
P775
P776
P777
P778
P779
P780
P781
P782
P783
P784
P785
P786
P787
P788
P789
P790
P791
P792
P793
P794
P795
P796
P797
P798
P799
P800
P801
P802
P803
P804
P805
P806
P807
P808
P809
P810
P811
P812
P813
P814
P815
P816
P817
P818
P819
P820
P821
P822
P823
P824
P825
P826
P827
P828
P829
P830
P831
P832
P833
P834
P835
P836
P837
P838
P839
P840
P841
P842
P843
P844
P845
P846
P847
P848
P849
P850
P851
P852
P853
P854
P855
P856
P857
P858
P859
P860
P861
P862
P863
P864
P865
P866
P867
P868
P869
P870
P871
P872
P873
P874
P875
P876
P877
P878
P879
P880
P881
P882
P883
P884
P885
P886
P887
P888
P889
P890
P891
P892
P893
P894
P895
P896
P897
P898
P899
P900
P901
P902
P903
P904
P905
P906
P907
P908
P909
P910
P911
P912
P913
P914
P915
P916
P917
P918
P919
P920
P921
P922
P923
P924
P925
P926
P927
P928
P929
P930
P931
P932
P933
P934
P935
P936
P937
P938
P939
P940
P941
P942
P943
P944
P945
P946
P947
P948
P949
P950
P951
P952
P953
P954
P955
P956
P957
P958
P959
P960
P961
P962
P963
P964
P965
P966
P967
P968
P969
P970
P971
P972
P973
P974
P975
P976
P977
P978
P979
P980
P981
P982
P983
P984
P985
P986
P987
P988
P989
P990
P991
P992
P993
P994
P995
P996
P997
P998
P999

```

HMBC (600 MHz, CD<sub>3</sub>OD)

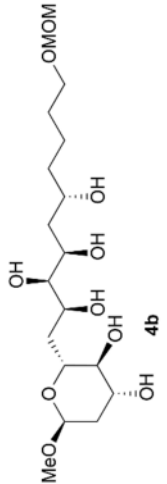

C:\Users\Takamura\Documents\Se...2023\8BD\_661\_cr3\_fragment\NMR\data\KH-37-1\_als  
 FILE KH-37-1\_als  
 DATE Thu Feb 21 11:47:21 2019  
 INSTR 1H  
 PULPROG zgpg30  
 PROCNO 1  
 F2 399.65 MHz  
 F1 124.00 MHz  
 OBSERV 13C  
 FREQ 79.9160 Hz  
 F2 399.65 MHz  
 F1 124.00 MHz  
 OBSERV 1H  
 FREQ 500.1360 Hz  
 SCANS 8  
 DS 4  
 AQ 2.9070 sec  
 PC 6.40 usec  
 PM 1  
 L1 23.6 C  
 L2  
 L3  
 SOLT CDCl3  
 SOLNT CDCl3  
 EXPT 7.26 min  
 EXRF 0.15 Hz  
 RGAIN

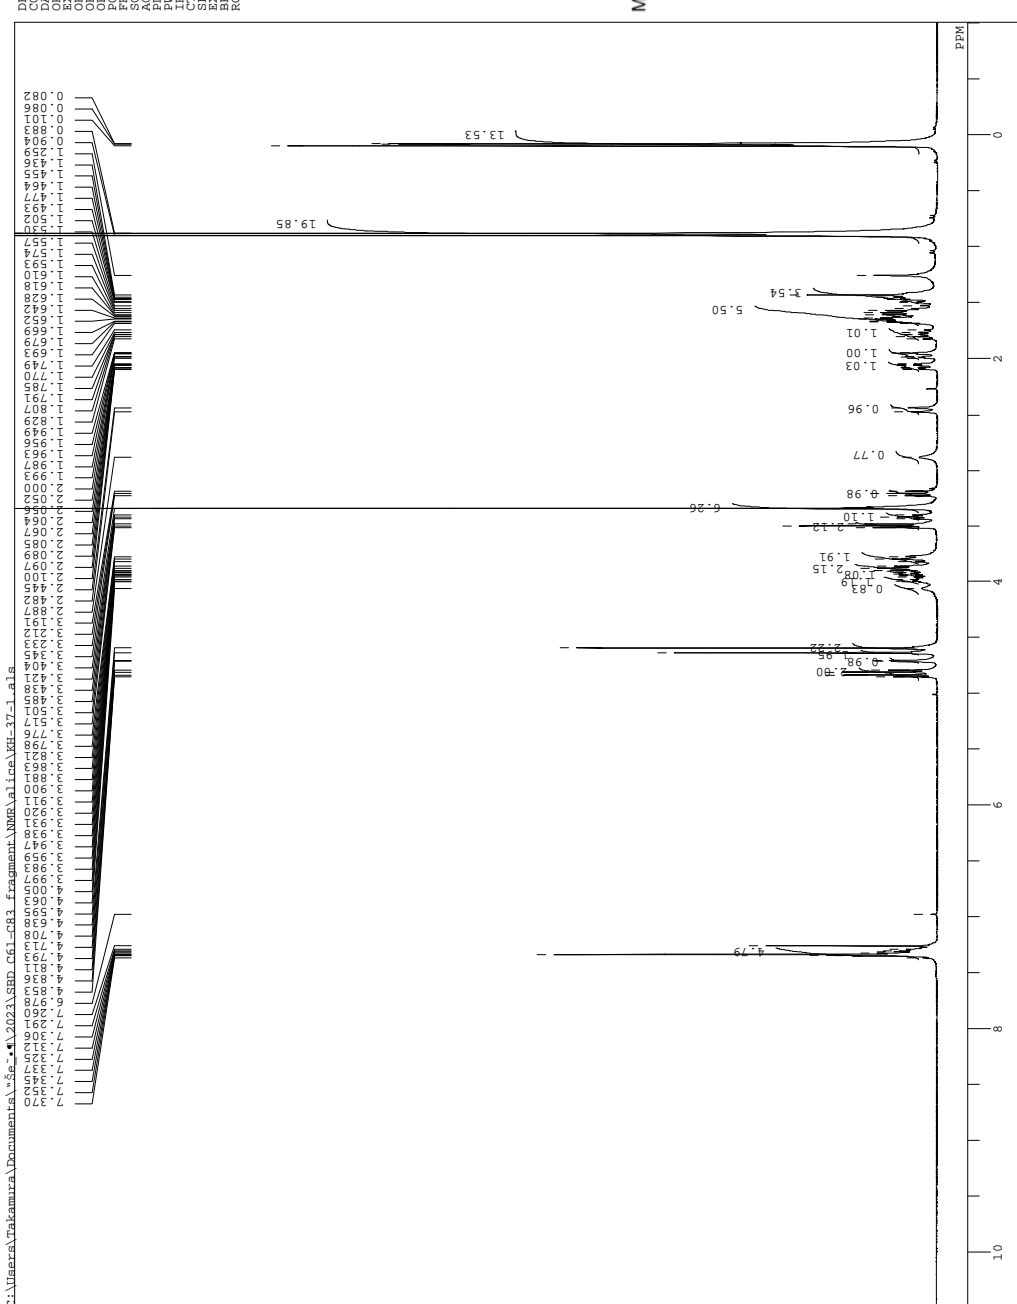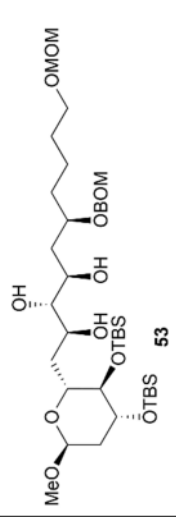

C:\User\Takamura\Documents\Se\_4\2021\SRD\_561-C83\_Fragment\NMR\alica\KH-37-1\_13C\_als  
 FILE KH-37-1\_13C\_als  
 CONTM Thu Feb 21 12:22:45 2019  
 CPD 13C  
 ORNOC 13C  
 EXMOD BCM  
 ESSE 100.40 MHz  
 OFPIN 125.00 MHz  
 FREQ 10500.00 Hz  
 F2FREQ 27137.90 Hz  
 SCANS 620  
 ACQTM 1.2039 sec  
 PUL 1.680 usec  
 INTC 1H  
 SLEN 25.7 c  
 SLVN CDCL3  
 EXRF 77.00 PPM  
 REAN 2.00 Hz  
 RGAIN 2.24

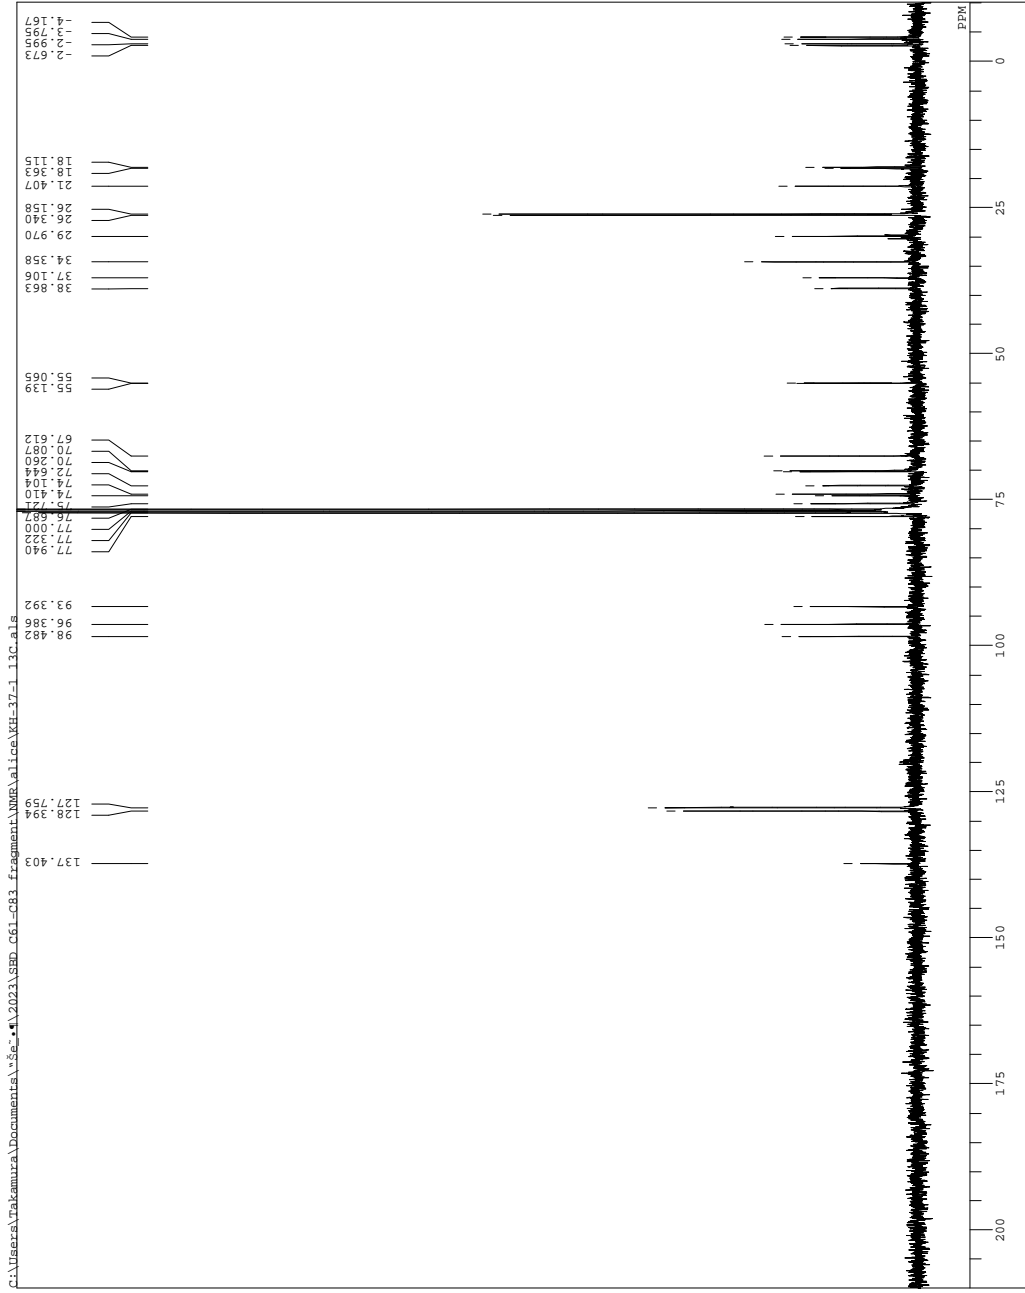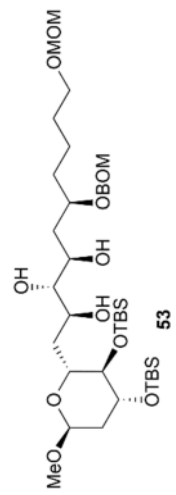

C:\Users\Tadamura\Documents\...2023\SED\_061\_C03\_Fragment\MIR\alpha.Lico\KH-24-2-C6D6-Data.als  
 DFILF KH-24-2-C6D6-Data.als  
 COMF KH-24-2-1H-Data.als  
 CONTC 2020-02-13 21:05:59  
 EXMOC 1  
 EXMOD S2pul  
 OFPRQ 599.76 MHz  
 OFPFI 4.50 Hz  
 OFPIN 4.50 Hz  
 POINT 962768 Hz  
 SCANS 32  
 ACQTM 3.4079 sec  
 PD 1.5921 sec  
 PUL 5.25 usec  
 IENUC  
 CTEMP 25.0 c  
 EXPRF c6d6  
 BF 7.16 ppm  
 RGAIN 0.12 Hz  
 42

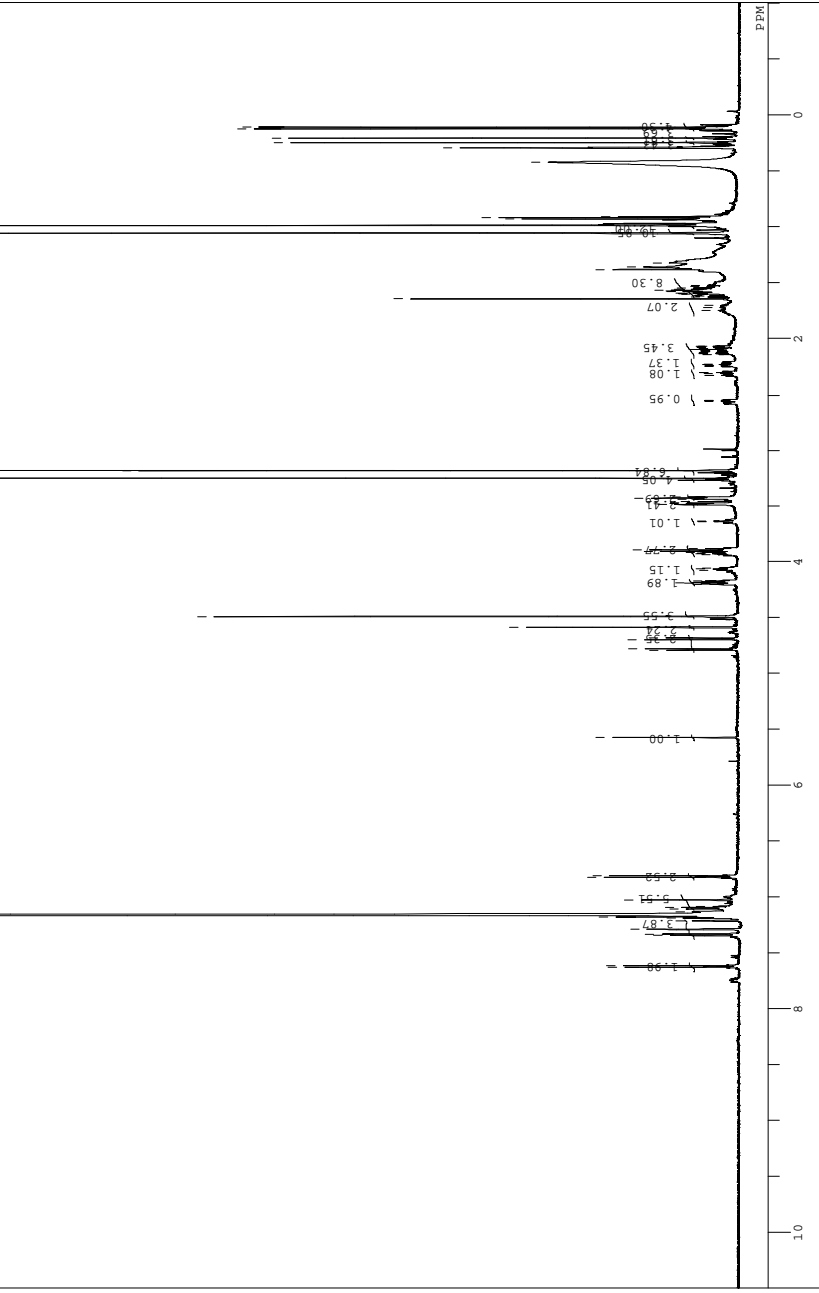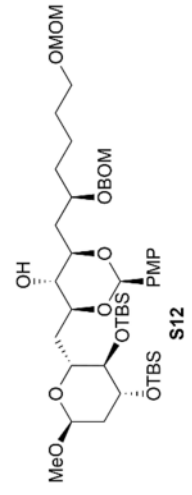

C:\Users\Takatsuma\Documents\Se\_\*\2021\86D\_661-c83\_fragment\NMR\all\ce\KH-24-2-13c\_66D6\_als

DEPT KH-24-2-13c\_66D6\_als  
 INSTR spect  
 DATE\_ 2020-02-13 21:11:53  
 ORNUC C13  
 QRES 0.15  
 PROCNO s2pul  
 PULPROG zgpg30  
 RESFREQ 150.82 MHz  
 ORSET 6.74 KHz  
 ORFEN 2.30 Hz  
 FREQ0 37878.79 Hz  
 SCANS 64  
 PCQTM 0.834 sec  
 PCQTA 2.134 sec  
 PM1 5.75 usec  
 PM2  
 PM3  
 TEMPC 25.0 c  
 SFO 125.76 MHz  
 SILVNT c6d6  
 EXREF 128.00 PPM  
 EXREF 0.160 Hz  
 RGAIN

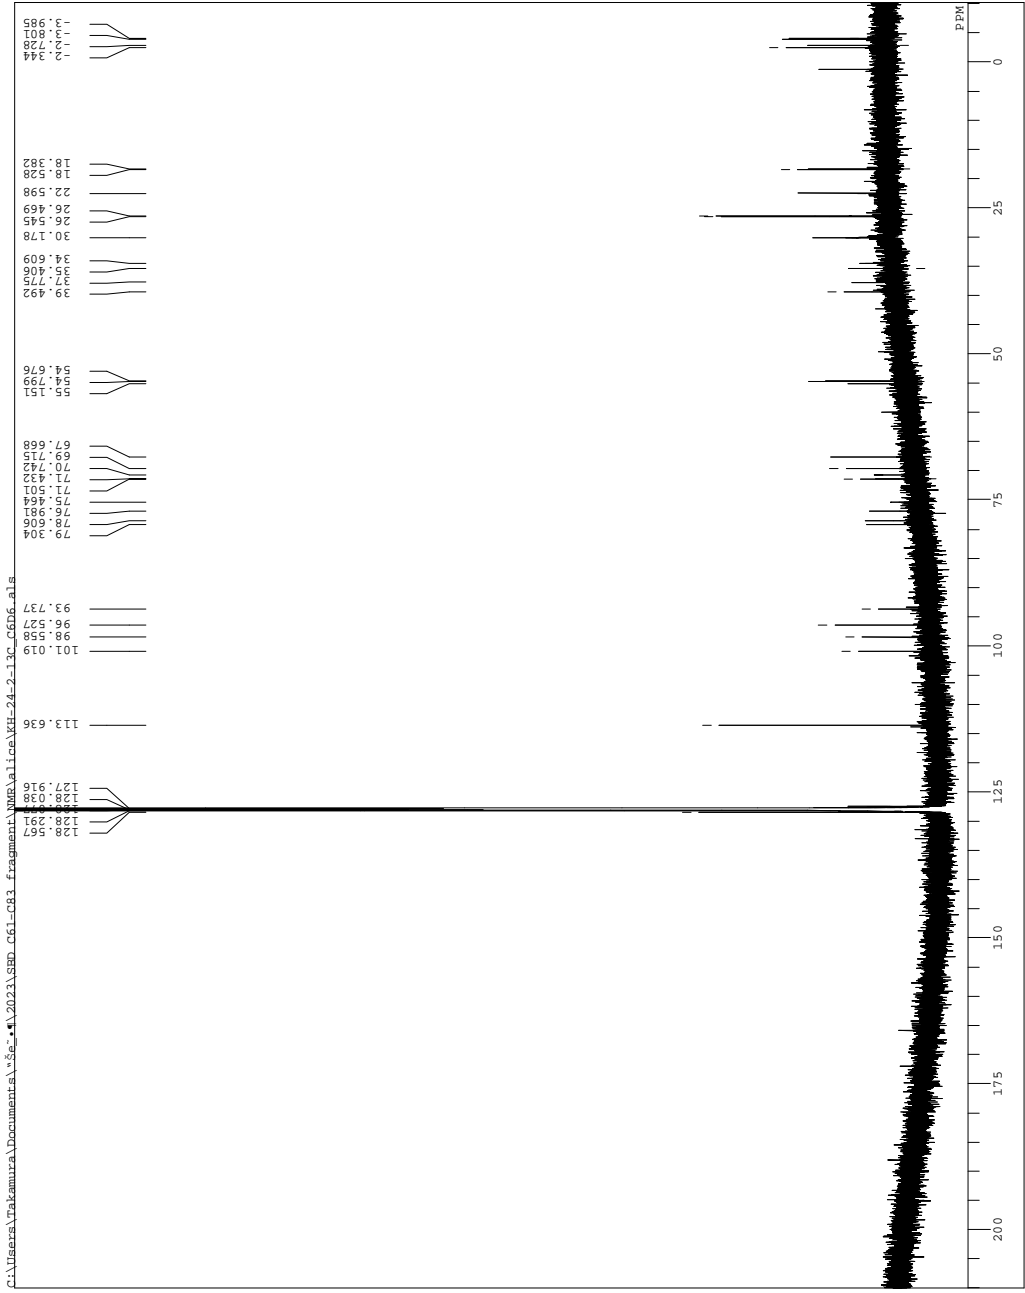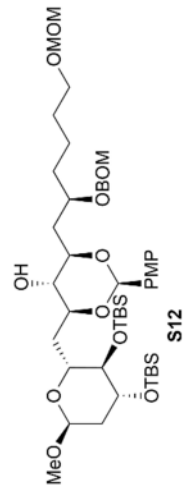

C:\Users\Takatuzaki\Documents\2021\SSD\_C61-83\_Fragment\NMR\data\KH-38.a1s  
 FILE KH-38.a1s  
 COMPT 1H  
 DATE\_ TIME Sat Feb 23 14:31:53 2019  
 INSTR spect  
 EXMOD NON  
 OBPRO 398.65 MHz  
 OBSFQ 10500.00 Hz  
 POINT 32768  
 SCANS 79931.6 Hz  
 ACQTM 4.0953 sec  
 PD 2.9010 sec  
 P1 6.40 usec  
 IRRUC 1H 24.2 C  
 CTEMP CDCl3 7.26 ppm  
 EXREF 0.12 Hz  
 BF 1.4  
 RGAIN

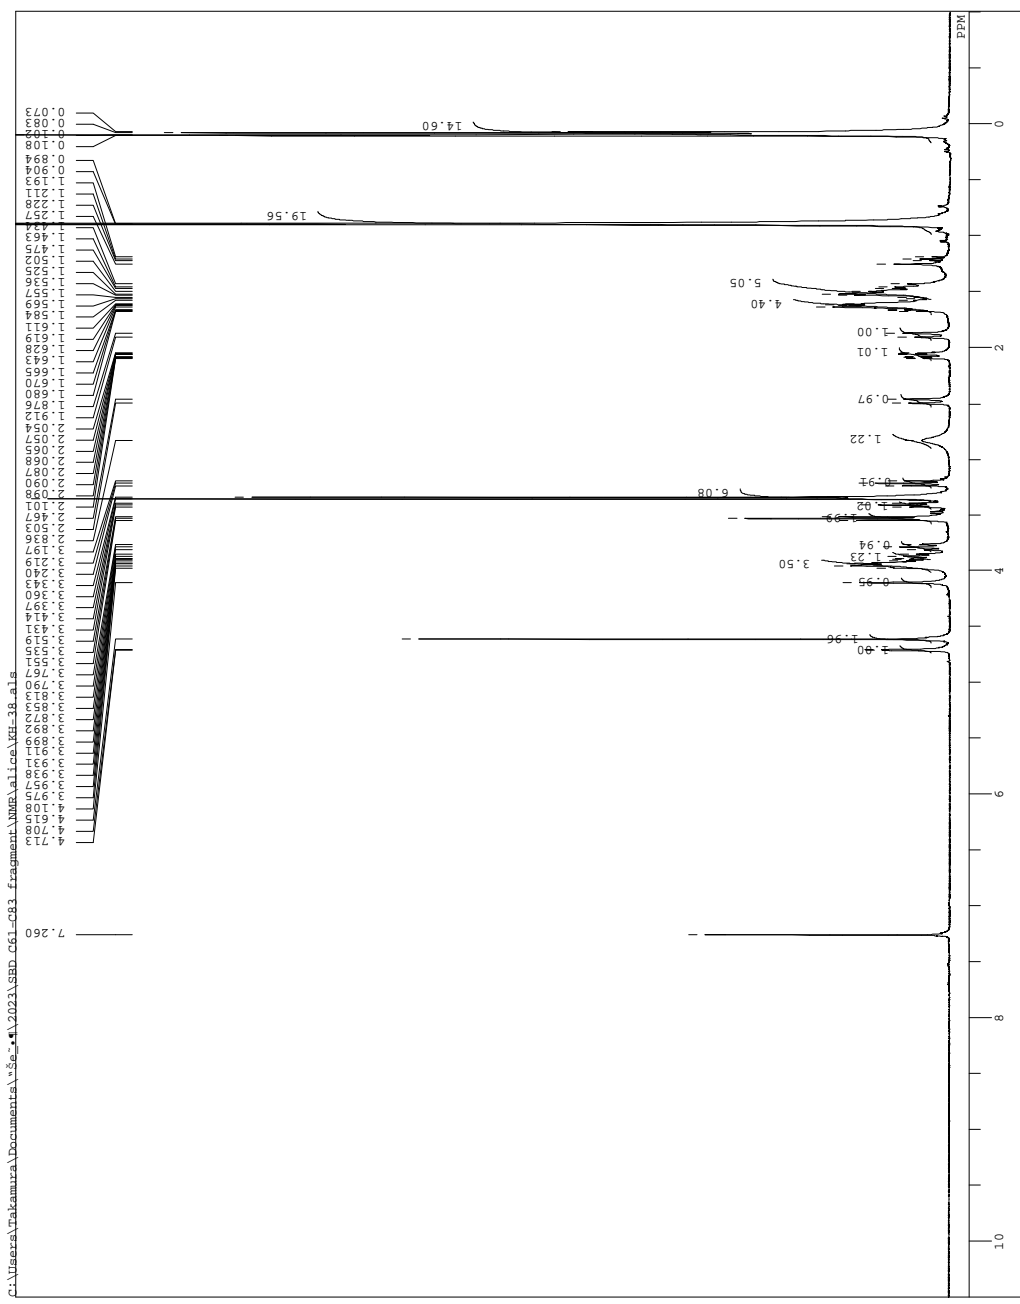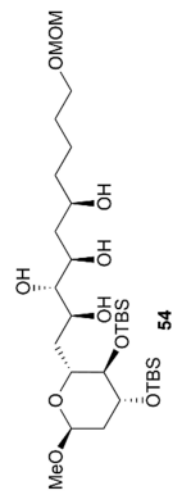





D:\User\Takamura\Documents\Se\_4\2021\SHD\_661\_C83\_Fragment\NMR\1ca\KH-44-1H\_als  
 Date\_ 2019-03-07 21:08:45  
 CONT H1  
 ORNUC H1  
 EXMOD s2pul  
 OBSF1 599.76 MHz  
 OBSF2 7.42 KHz  
 PULPROG zgpg30  
 PCYCLIC 3.60 Hz  
 FREQ0 9635.38 Hz  
 SCANS 32  
 ACQTM 3.4509 sec  
 PUL 1.5225 usec  
 INJ 25.0 c  
 INVT cd30d  
 SFTN 3.30 PPM  
 EXREF 0.32 Hz  
 RGAIN

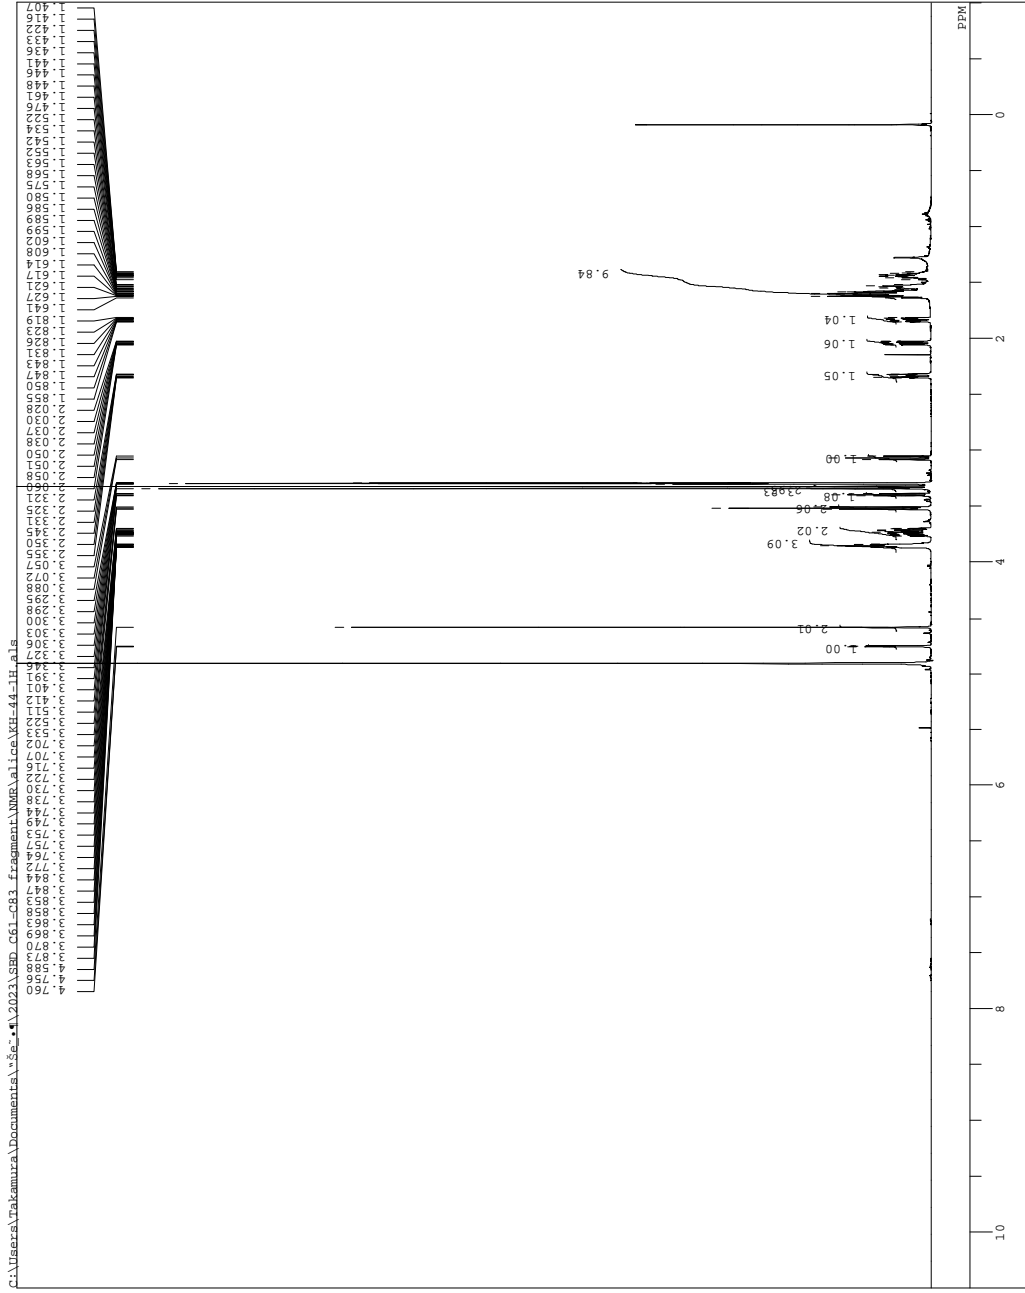

C:\Users\Takamura\Documents\Se\_4\2021\SRD\_061-083\_Fragment\NMR\alica\KH-44-13C\_als

DFILE KH-44-13C\_als  
 CONV 2019-03-07 21:22:57  
 C13  
 EXMOD s2pul  
 FREQ 150.82 MHz  
 PULPROG zgpg30  
 OBSF1 17.32 KHz  
 OBFTN 3.00 Hz  
 F2FREQ 37878.79 Hz  
 SCANS 64  
 ACQTM 0.8531 sec  
 RELAX 2.575 usec  
 PUL 25.0 c  
 IRETC 49.00 pfm  
 SLEW 0.12 Hz  
 EXREF  
 REFIN

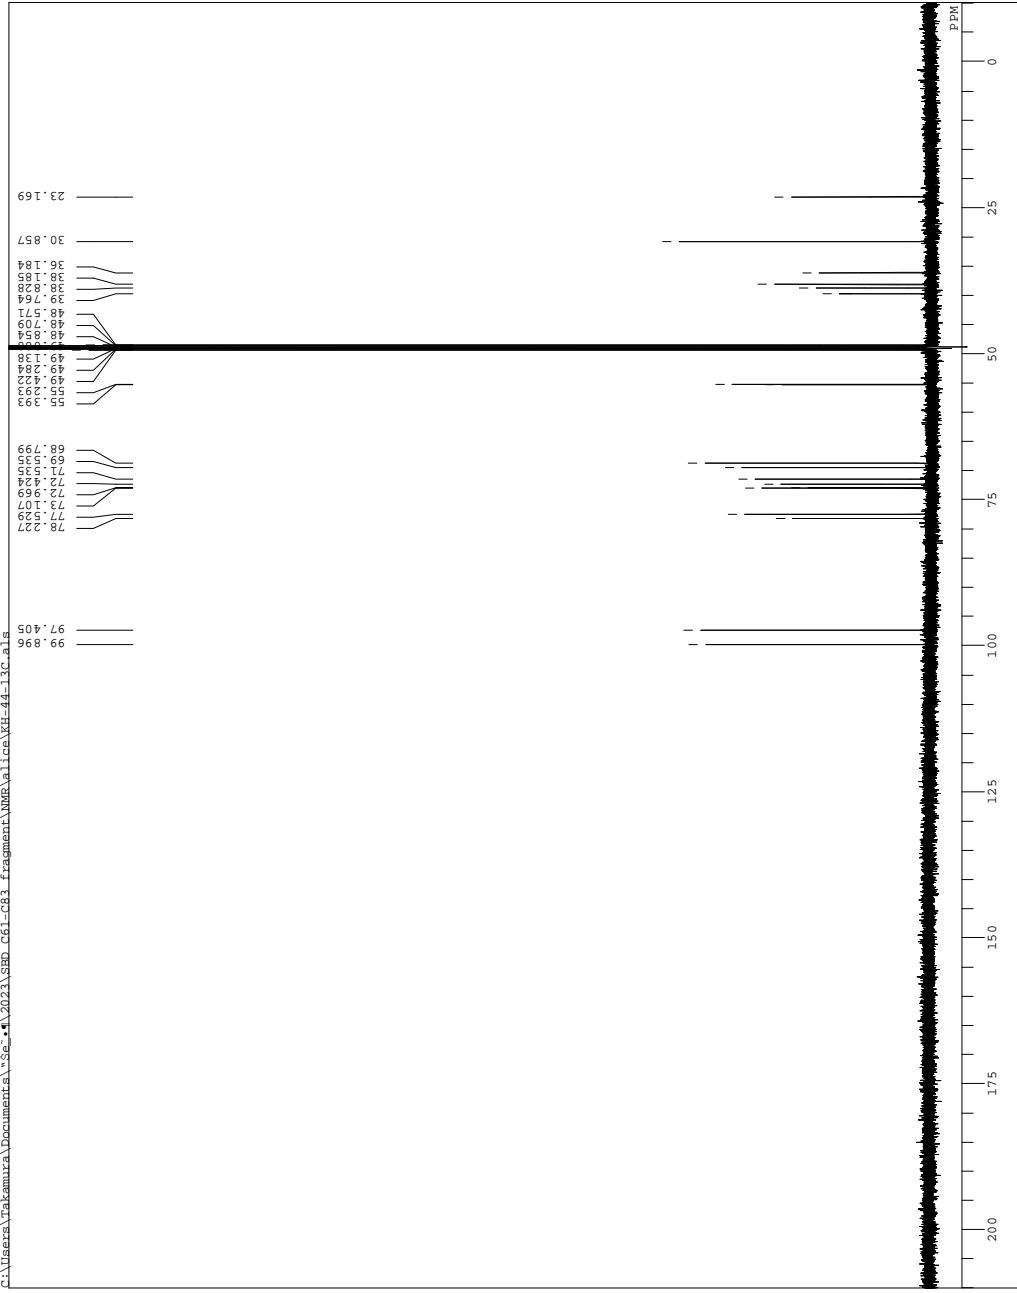

```

exp3 gcosy
=====
NAME      SAMPLE
date      REC# 8 2013   ba
solvent    cdh3o       7
sample     6120
=====
ACQUISITION
pr      9615.4  temp    not used
sc      0.159   gain     50
in      4096   f1qz     0
p2      4096   f2       0
az      32     ad      -0.075
cp      1.000   abse   not used
ct      4     fr      4096
=====
2D ACQUISITION  F1 PROCESSING
acq     9615.4  abn     -0.083
sc      0.159   gain     50
in      4096   f1qz     0
pr      0     proc1   2D
=====
SOLVENTATION  f1  4096
=====
acqmode      s      4096
=====
wrt          n      sp      -38.3
tx           s      wp      2084.6
tx2          s      wp      2084.6
tx3          s      wp      3248.1
tx4          s      wp      3248.1
tx5          s      wp      3248.1
tx6          s      wp      3248.0
tx7          s      wp      3248.0
tx8          s      wp      1979.2
tx9          s      wp      1979.2
tx10         s      wp      1979.2
=====
SOLVENT      s102
=====
GEN          0.001000  wc
=====
SAMPLING    0.001500  wq
=====
SPIN        0.001500  wq2
=====
SOLVENT     CL3  VR      169
=====
OR          mm  LR      5
=====
SI         5
=====
BR

```

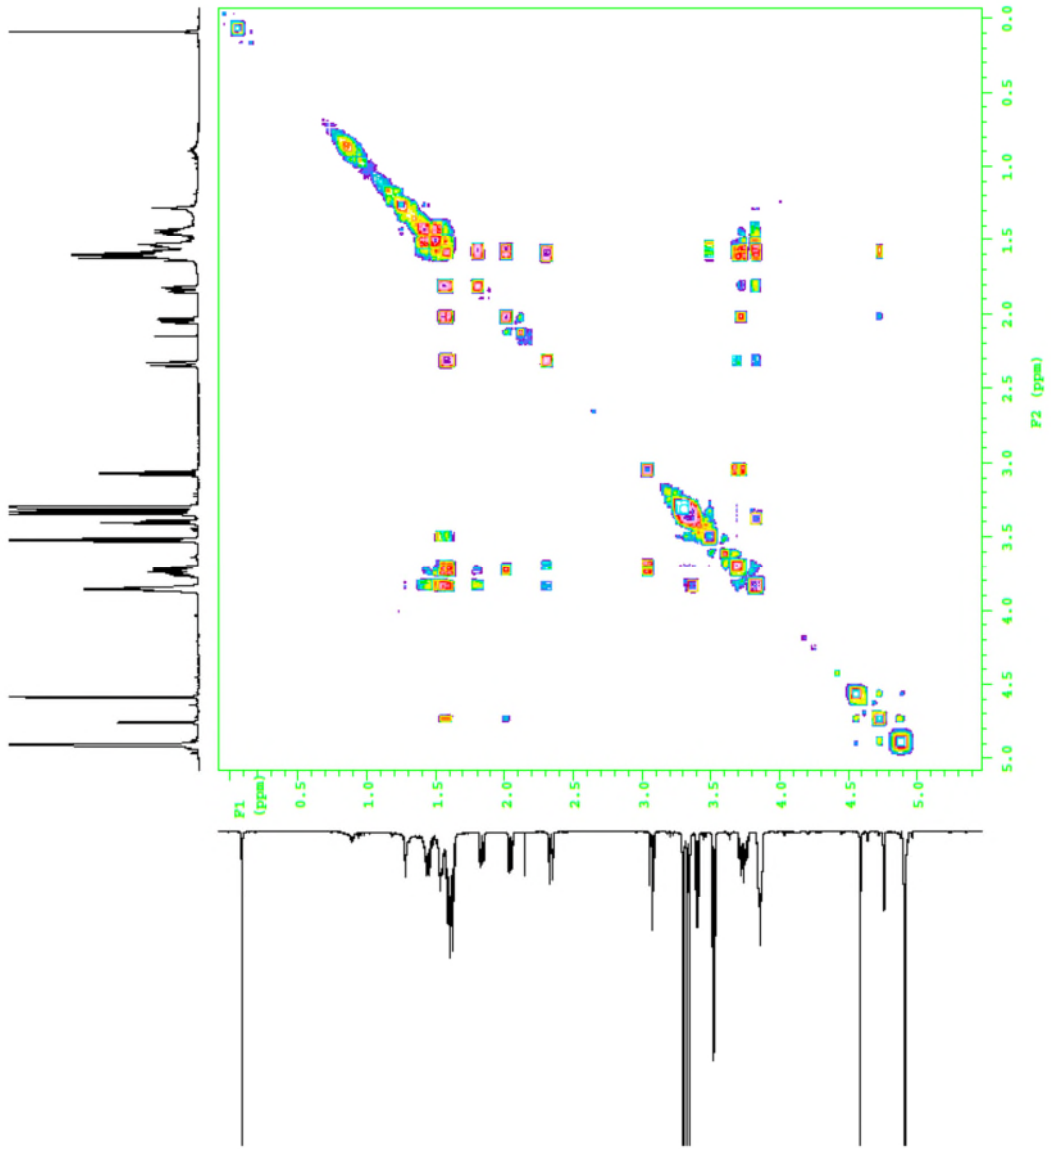

<sup>1</sup>H-<sup>1</sup>H COSY (600 MHz, CD<sub>3</sub>OD)

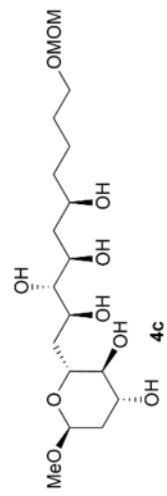

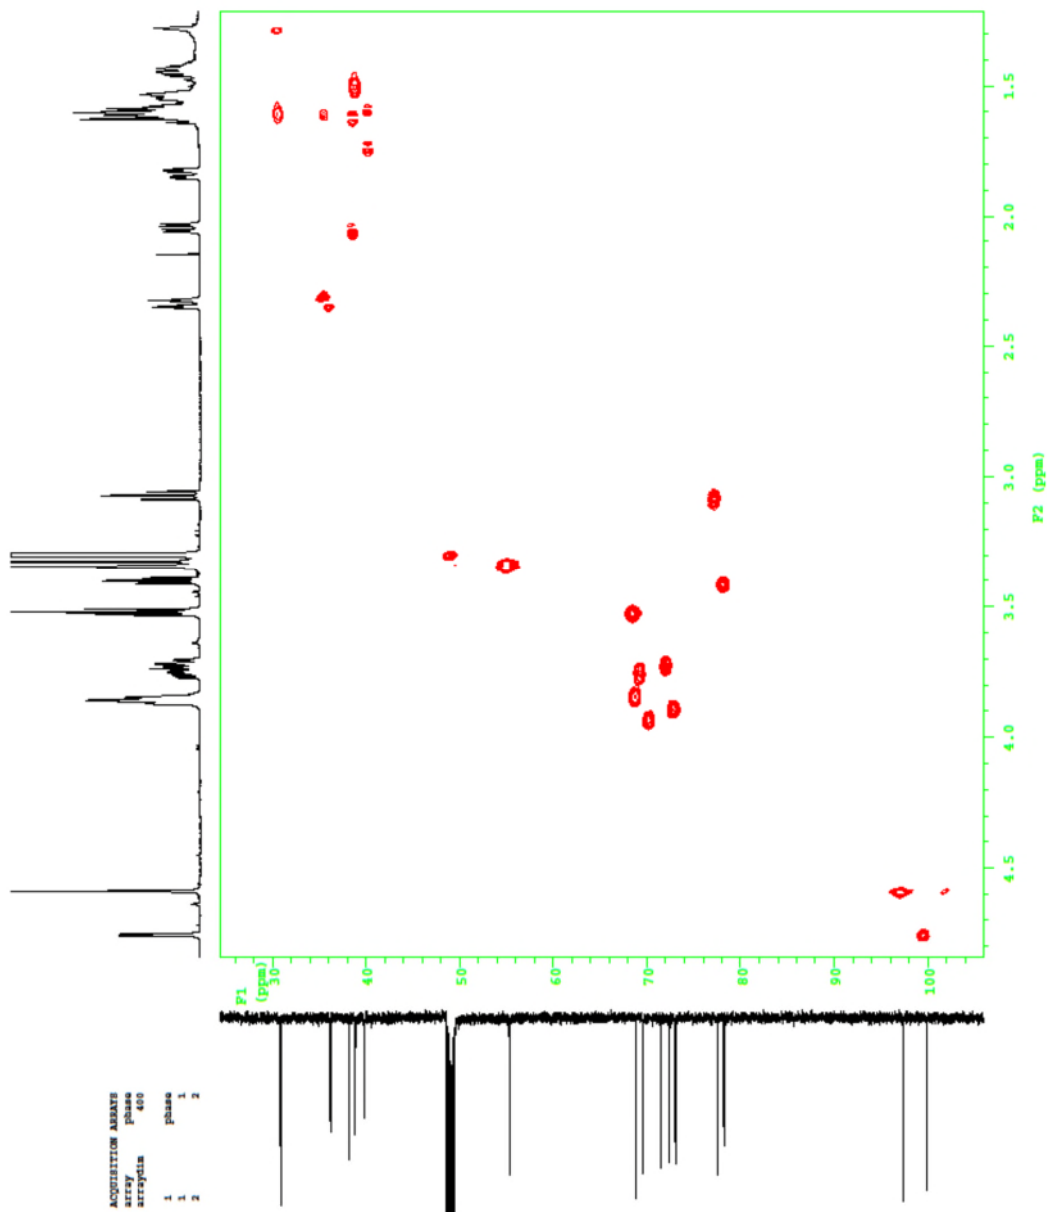

```

emp4 gMOC
=====
data   Mar 5 2019   ha   PLAGE
solvent  cdcl3      emp1   y
sample   4c          emp2   y
acq      400MHz     emp3   y
sw       9.411.4    emp4   6120
nt       0.184      emp5   not used
zb       4000      emp6   60
as       32        emp7   0
dl       1.000     emp8   5102
nt       32       emp9   0.003000
=====
2D ACQUISITION: 2D ratio 3.977
nt       361200    emp10  0.003000
sw       361200   emp11  F2 PROCESSING
phase   arrayed   emp12  not used
PRESATURATION gfs not used
satmode n       emp13  4096
wet     TRANSMITTER n F2 PROCESSING
nt       0.005
nt       0.005
nt       0.005
nt       599.787   emp14  not used
nt       599.7   emp15  2048
tpwr    59   emp16  DISPLAY
pw       10.800   emp17  736.2
=====
INCOUPLAR:
du       643      emp18  3078.7
du       780.5    emp19  3078.7
du       780.5    emp20  3188.3
du       840       emp21  3078.2
du       35088     emp22  10255.9
du       40       emp23  7389.7
=====
pval1   40       emp24  PLOT
pwr     12.100   emp25  351.9
=====
flsh   gMOC
=====
multisig 146.0   emp26  308.9
multisig 2       emp27  67
mult     2       emp28  67
=====
al     odc     ph
=====

```

HMOC (600 MHz, CD<sub>3</sub>OD)

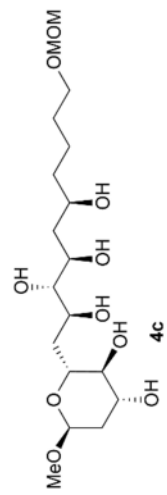

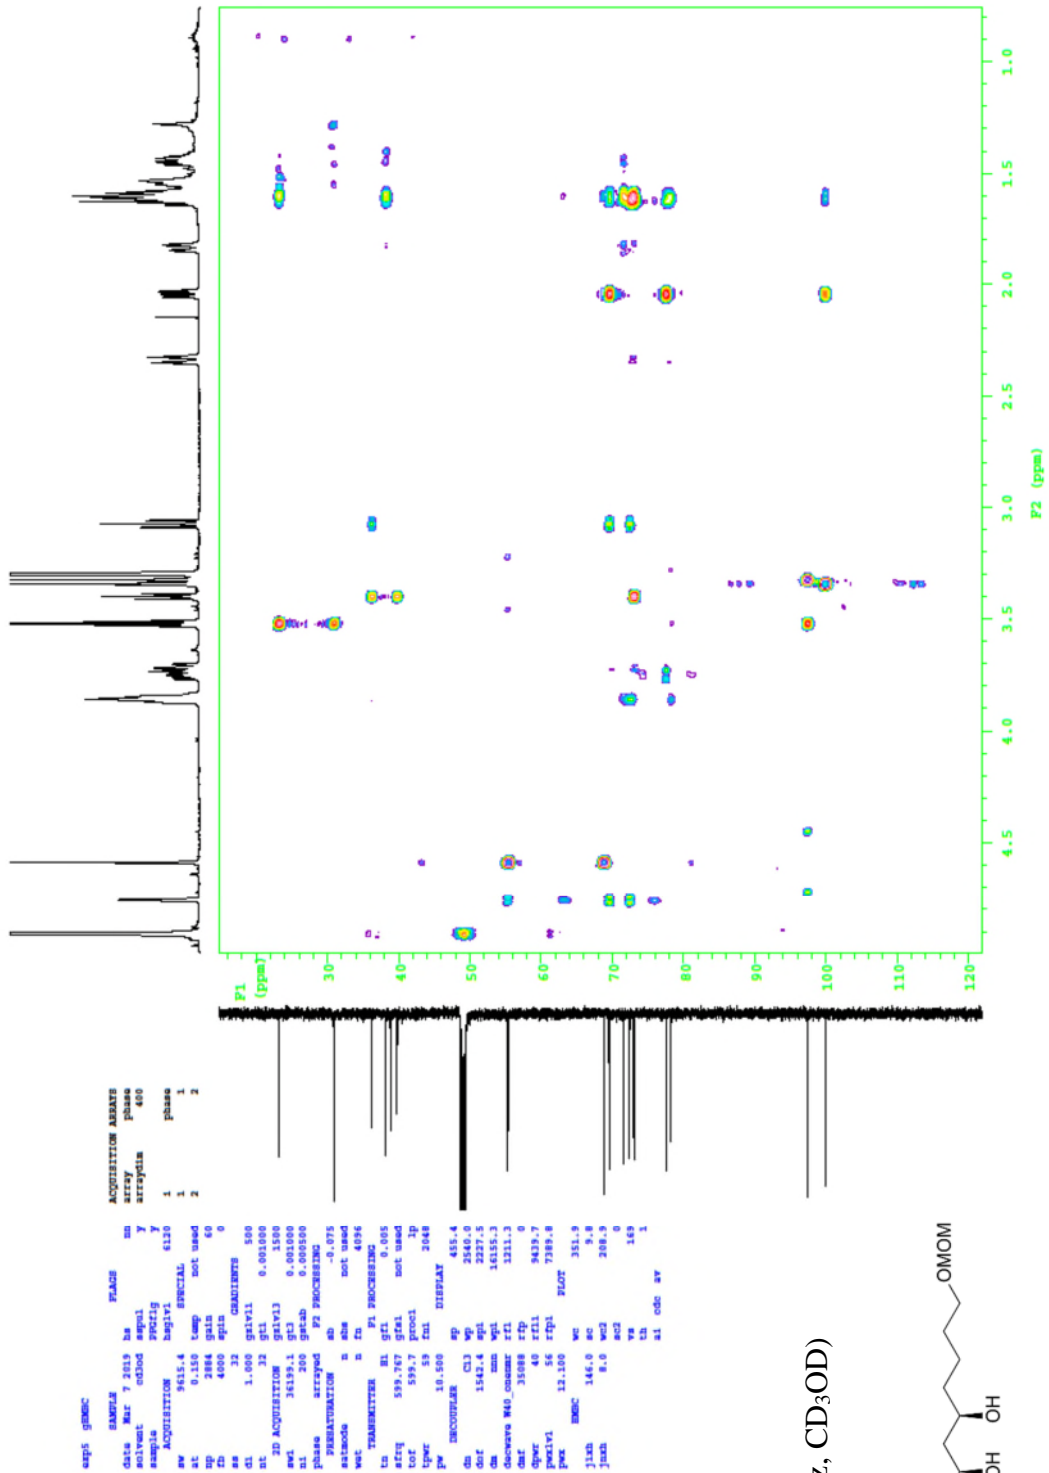

HMBC (600 MHz, CD<sub>3</sub>OD)

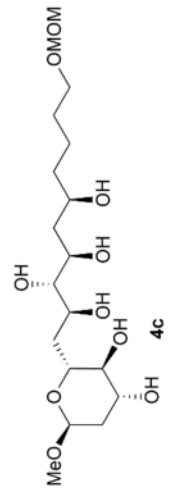

DEFILE KH-42-1-1H.als  
 DATE\_ Acq Fri Mar 01 13:13:30 2019  
 DATM\_ 19  
 ORNVC 1H  
 ORNVD NOM  
 ORNVO 399.65 MHz  
 ORSET 124.00 KHz  
 ORFTN 10500.00 Hz  
 ORFECU 79831.60 Hz  
 SCANS 4.00000  
 PCQTM 2.9010 sec  
 PM1 6.40 usec  
 IRMNC 1H  
 SINTV 23.9 C  
 SILVNT CDCL3  
 EXREF 7.26 PPM  
 RGAIN 0.16

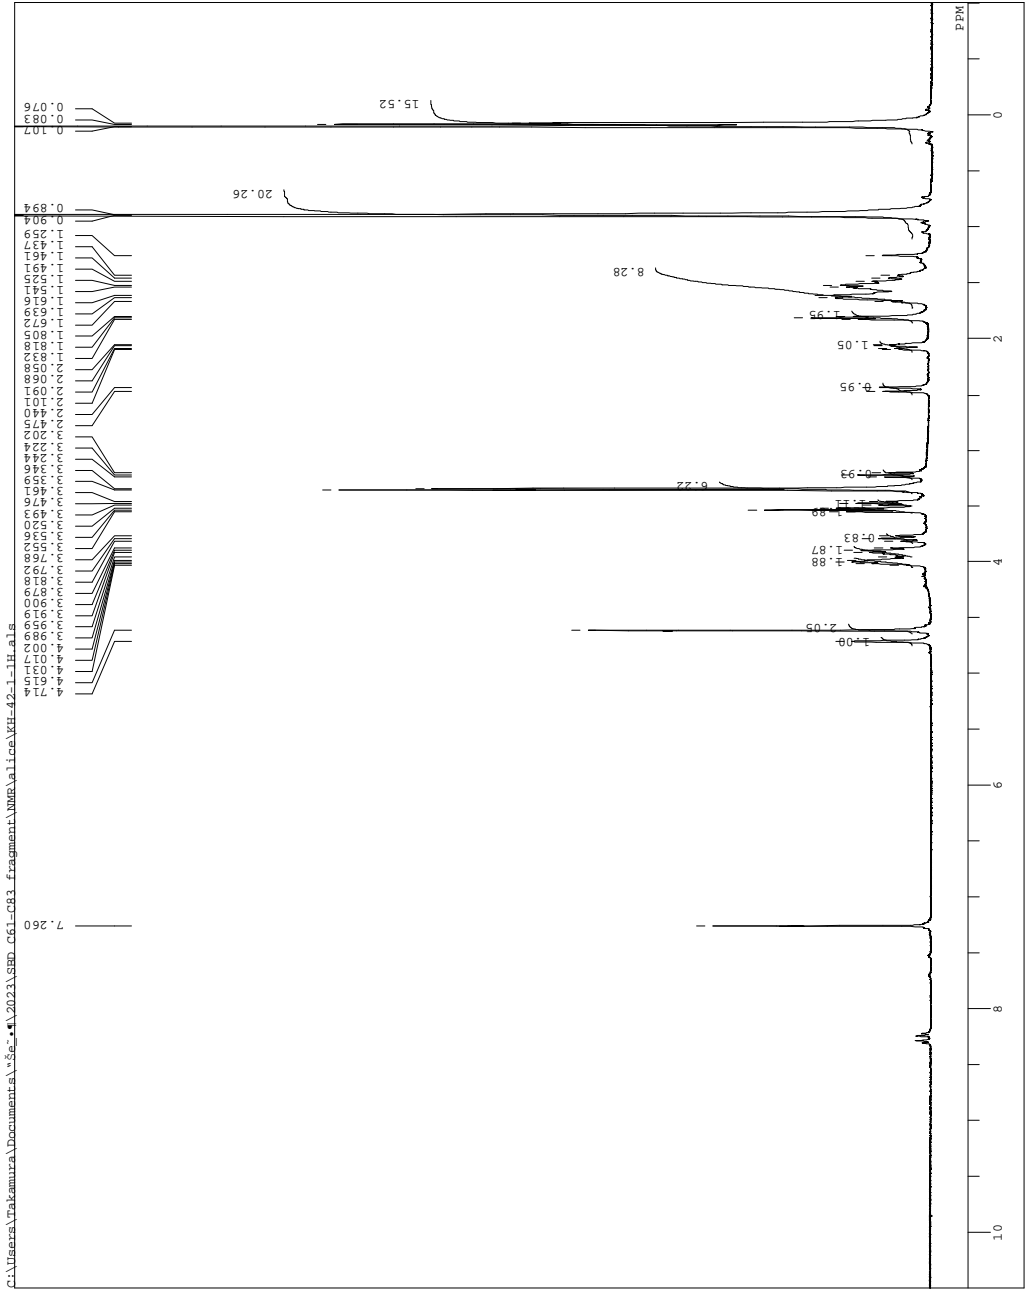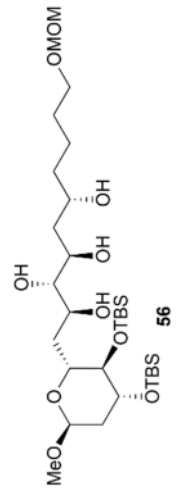

C:\Users\Takatsuma\Documents\Se\_\*\2021\SHD\_561-c83\_Fragment\NMR\13c\KH-42-1-13c\_als

DEFILE KH-42-1-13c\_als  
 DATE\_ 20190321  
 DATIM Fri Mar 01 18:06:21 2019  
 ORBIT 13C  
 PULPROG zgpg30  
 PROCNO 1  
 QPCONV 100.40 MHz  
 QRESOL 125.00 KHz  
 ORFEN 10500.00 Hz  
 FREQ0 27173.90 Hz  
 FREQ1  
 SCANS 1.320  
 PCYCLE 1.7240 sec  
 PULPROG 6.80 usec  
 PM1  
 INVC 1H  
 TEMPC 26.3 C  
 SOLVENT CDCL3  
 SREF 77.00 PPM  
 EXREF 2.24 Hz  
 RGAIN

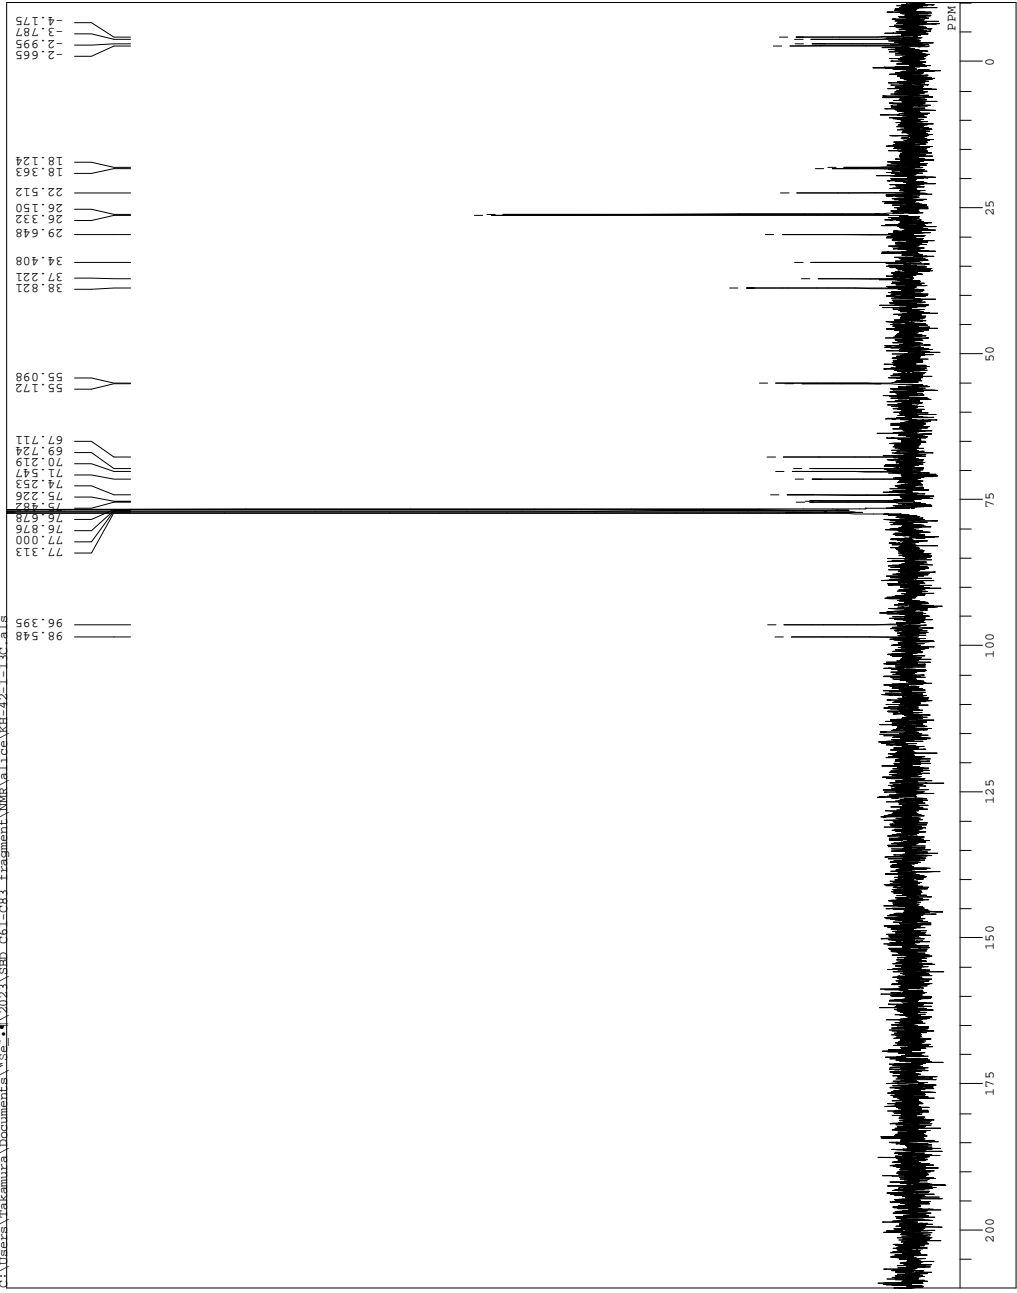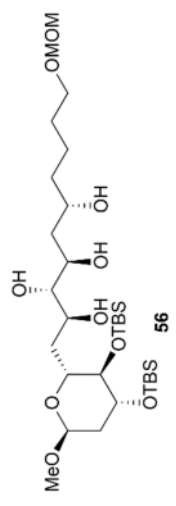



C:\Users\Takamura\Documents\Se\_\*\2021\SHD\_561-C83\_Fragment\NMR\1ca\KH-43-1H\_als  
 DFILE KH-43-1H\_als  
 COM1 2019-03-05 21:06:06  
 CONTC H1  
 ORNUC H1  
 EXMOD s2pul  
 OBSF1 599.76 MHz  
 OBSF2 7.42 KHz  
 OBF1N 3.60 Hz  
 OBF2N 0.00 Hz  
 FREQ1 9635.38 Hz  
 FREQ2 0.00 Hz  
 SCANS 32  
 ACQTM 3.4509 sec  
 PULPROG zgpg30  
 PVI 1.525 usec  
 IRENUC 25.0 c  
 IRTN 1000  
 SFTN cd30d  
 SIUNIT 3.30 ppm  
 EXREF 0.12 Hz  
 RGAIN

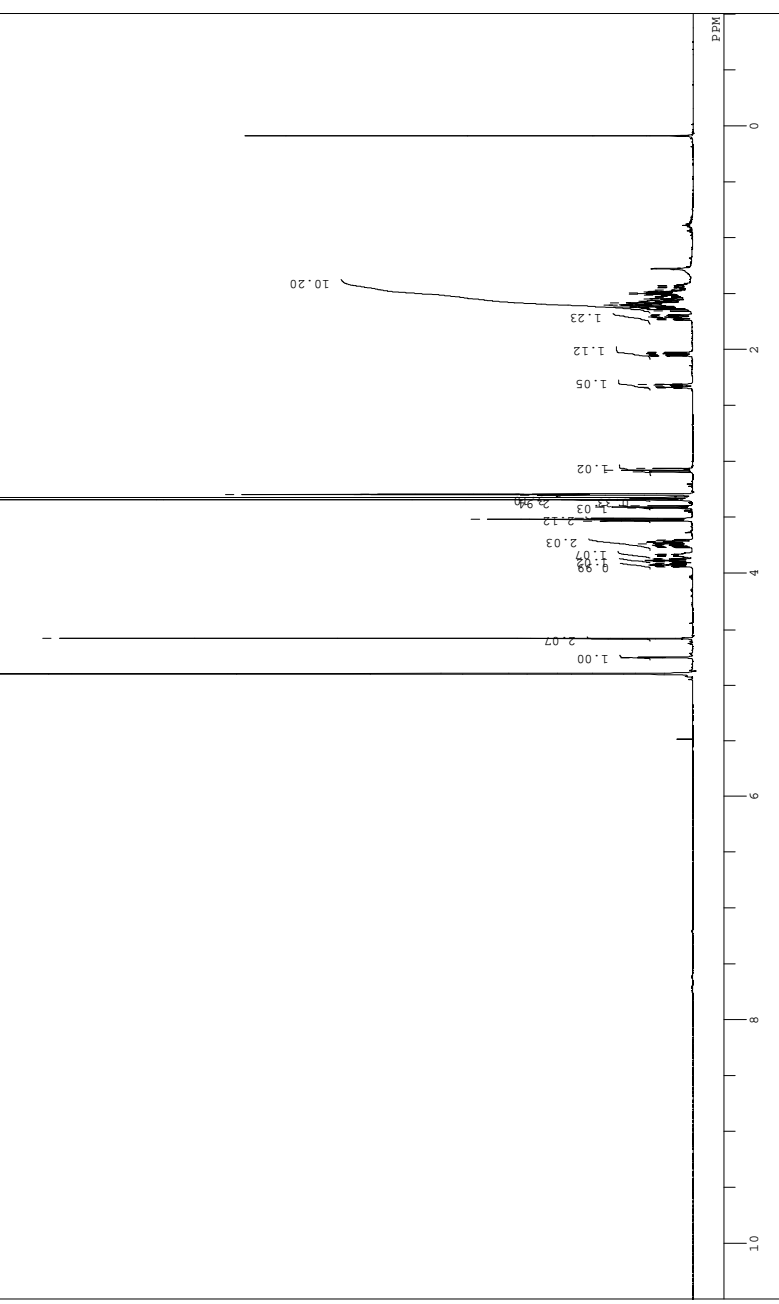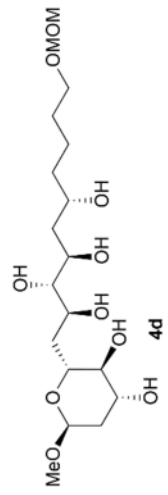

C:\Users\Takatsuma\Documents\Se\*\2021\SHD\_661-c83\_Fragment\NMR\1c\KH=43-13C\_als

DEFILE KH-43-13C\_als  
 DATE 2019-03-05 21:18:38  
 DTIME 21:18:38  
 ORNVC C13  
 ORNVD s2pul  
 ORNVO 150.82 MHz  
 ORNVT 71.32 KHz  
 ORNVS 32.00 Hz  
 ORNVA 37878.79 Hz  
 ORNVC 64  
 SCANS 0.8349 sec  
 PCQTM 2.1349 sec  
 PM1 5.75 usec  
 TRNVC 25.0 c  
 SFLVNT cd3od  
 EXREF 49.00 ppm  
 RGAIN 0.60

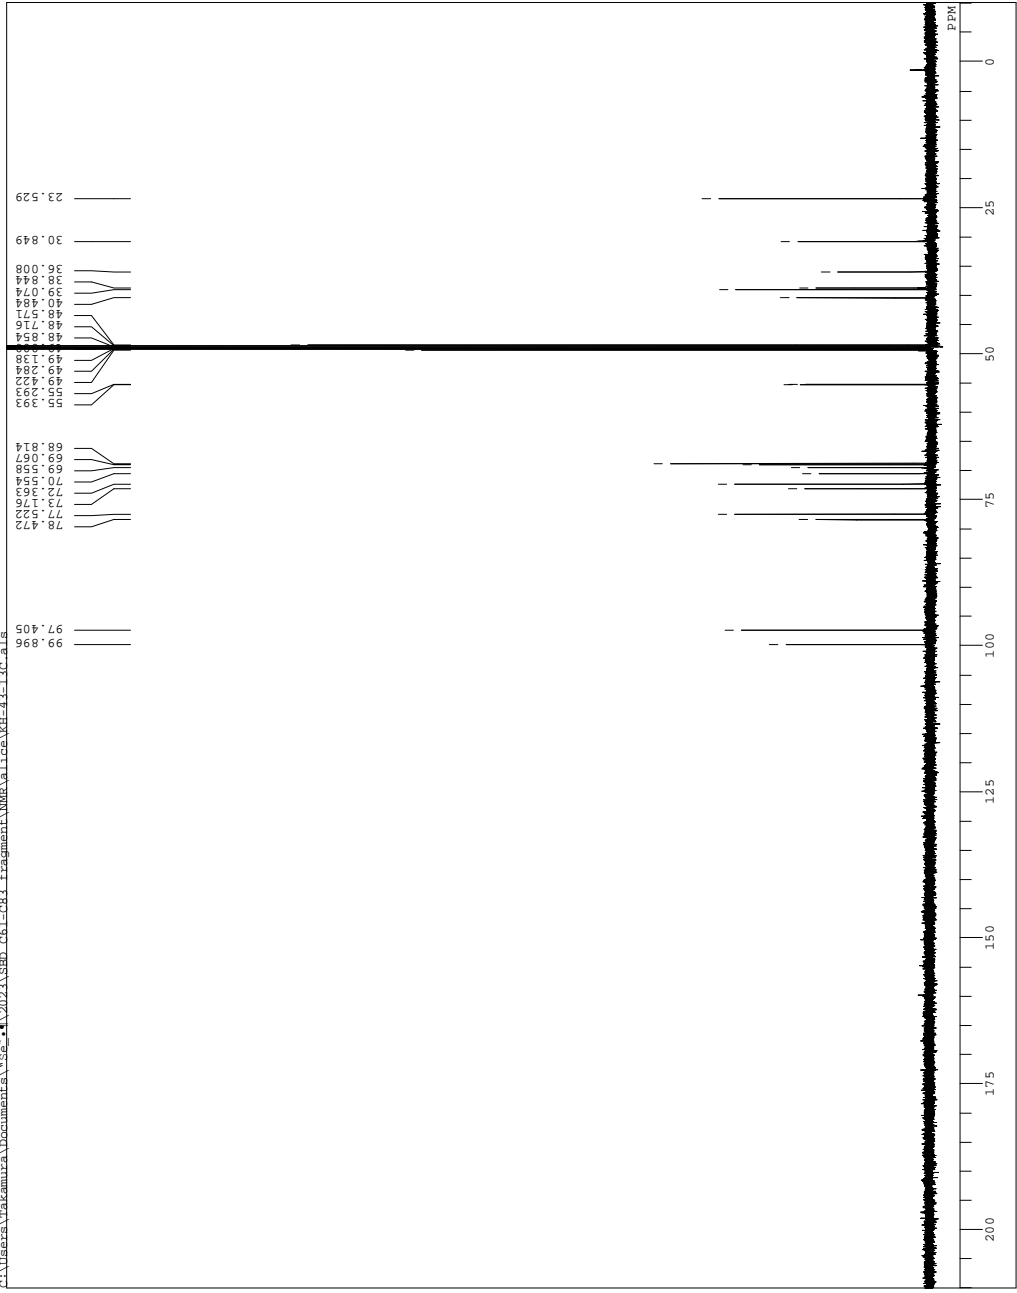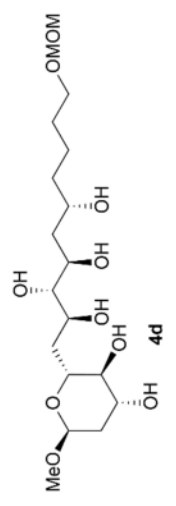



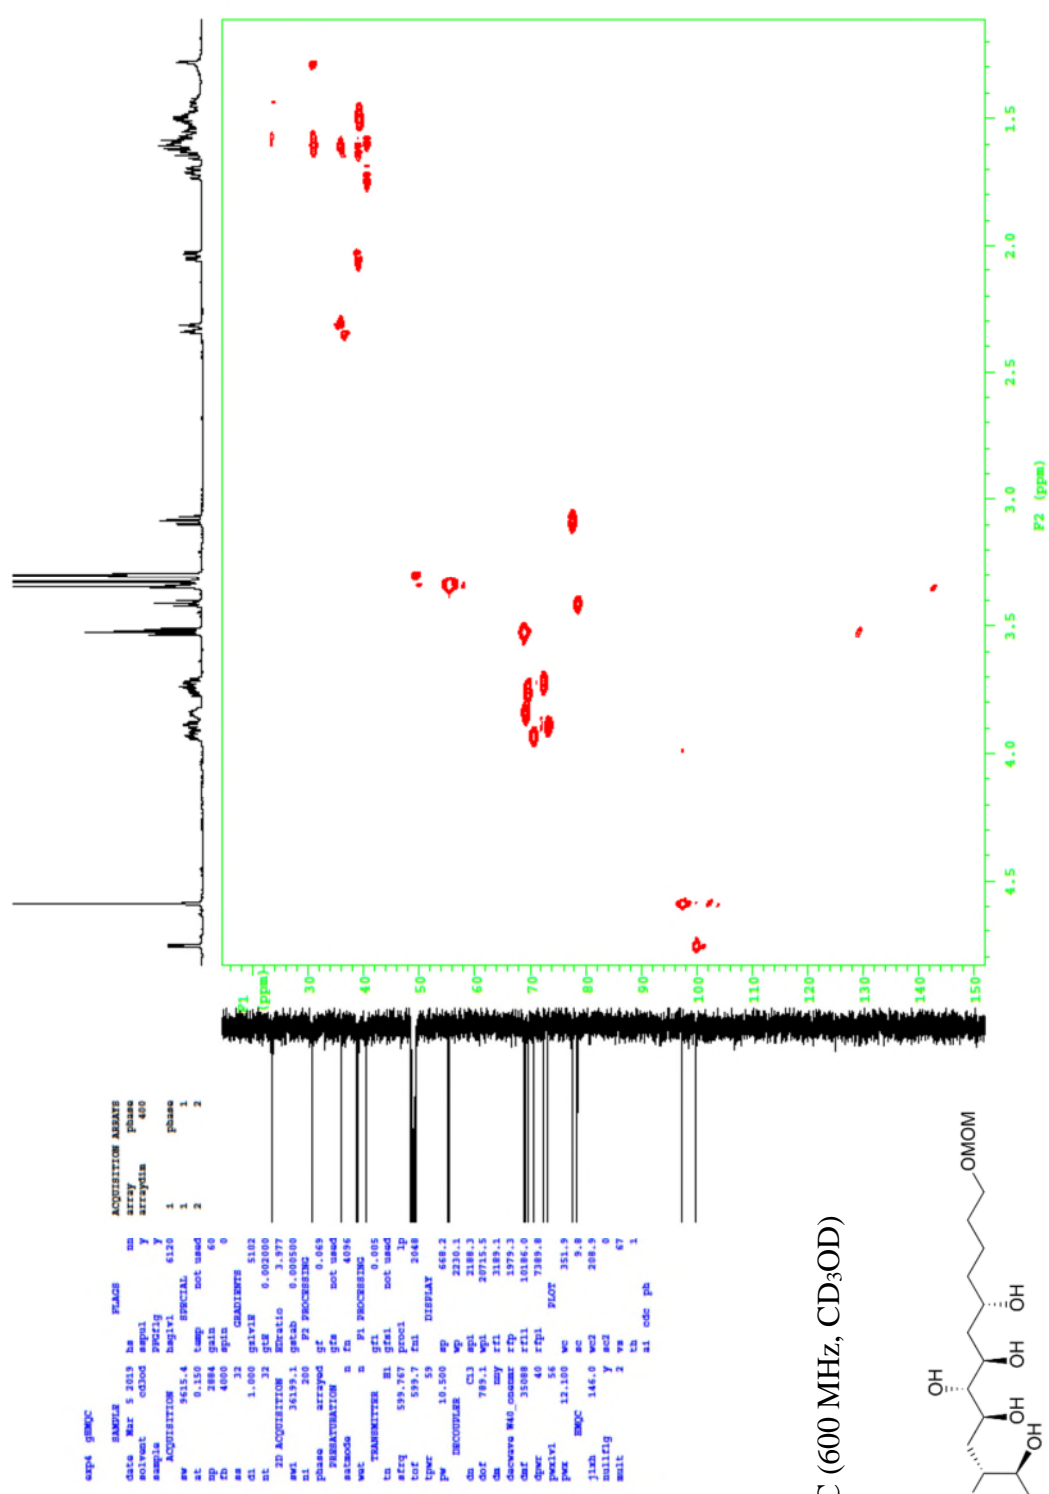

HMQC (600 MHz, CD<sub>3</sub>OD)

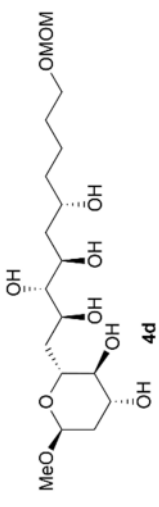

```

exp5 gMBC
=====
SAMPLE          NAME          PLATE
Date    Mar 5 2019   hs
solvent  cd3od      y
sample   array      y
=====
ACQUISITION     SERIAL    6110
=====
acq        1616.4  begin1
ns         1310    temp    not used
ns         3884    spins   not used
ns         4000    spins   0
=====
CH1         1.000  g1v11  500
=====
2D ACQUISITION  32  g11  0.001000
=====
acq        31199.1  g1v11  0.001000
ns         31199.1  g1v11  0.001000
ns         200  g1v16  0.000500
=====
phase  arrayed  F2 PROCESSING
=====
PARAMETER      VALUE
-----
satmode  n  shw  not used
wet       n  shw  not used
=====
INSTRUMENT      n  shw  not used
=====
TRANSMITTER     n  shw  not used
=====
freq          599.767  g1a1  not used
=====
proc          599.7  proc1  1p
=====
type         59  fml  1048
=====
pw           10.500  DISPLAY
=====
=====
DECOUPLER       n  shw  not used
=====
ch1            493.4  CP  493.4
ch2            1542.3  WP  1542.3
=====
ds            16403.7  W1  16403.7
=====
decouple MAG  constant  r1l  3190.1
=====
dof          31988  r1l  31979.3
=====
dqr         40  r1l1  9437.5
=====
pqr         56  r1l1  7389.8
=====
pwr         13.100  W1  351.9
=====
flah        146.0  ac  9.8
=====
jash         8.0  w2  208.9
=====
vs          67  w2  0
=====
ts          67  w2  0
=====
al  cdc  av  1
=====

```

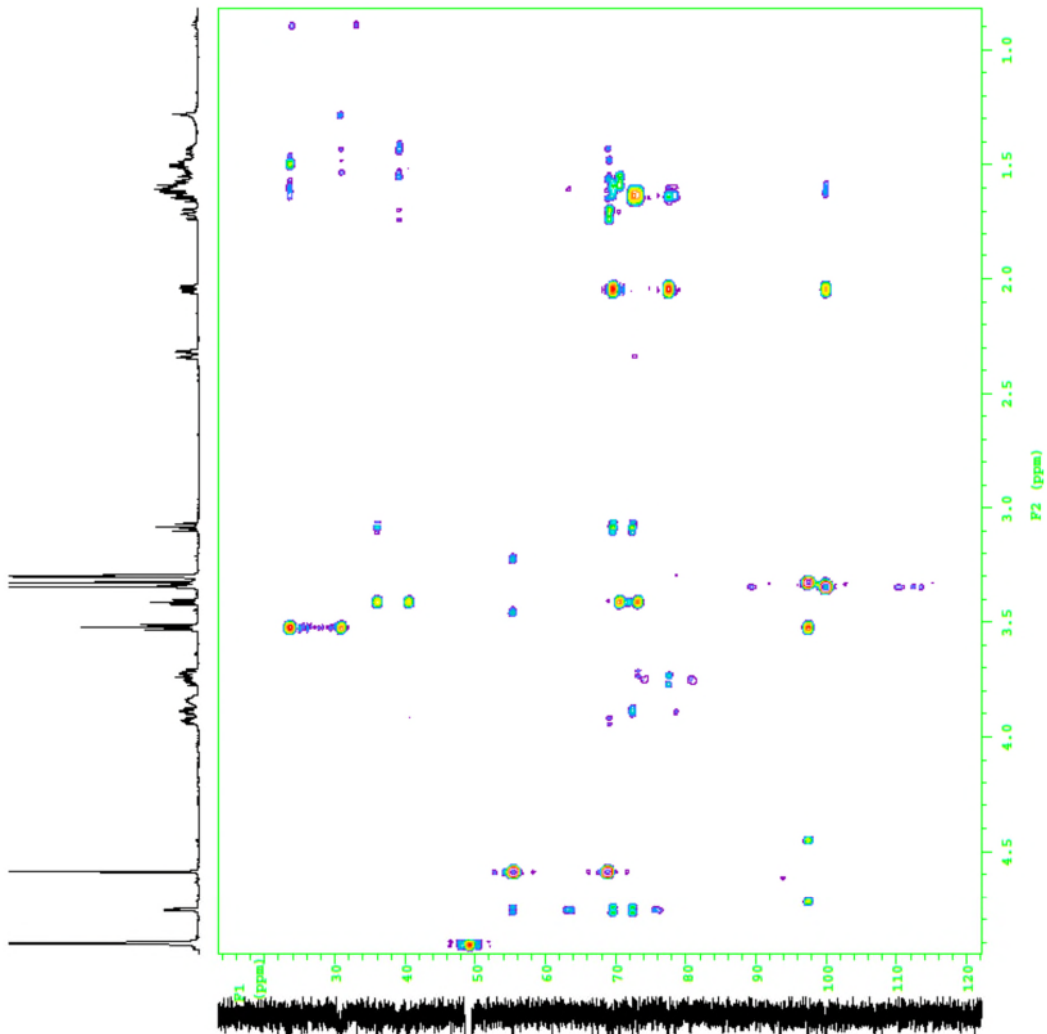

HMBC (600 MHz, CD<sub>3</sub>OD)

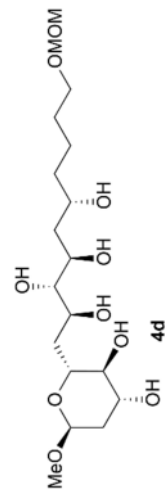

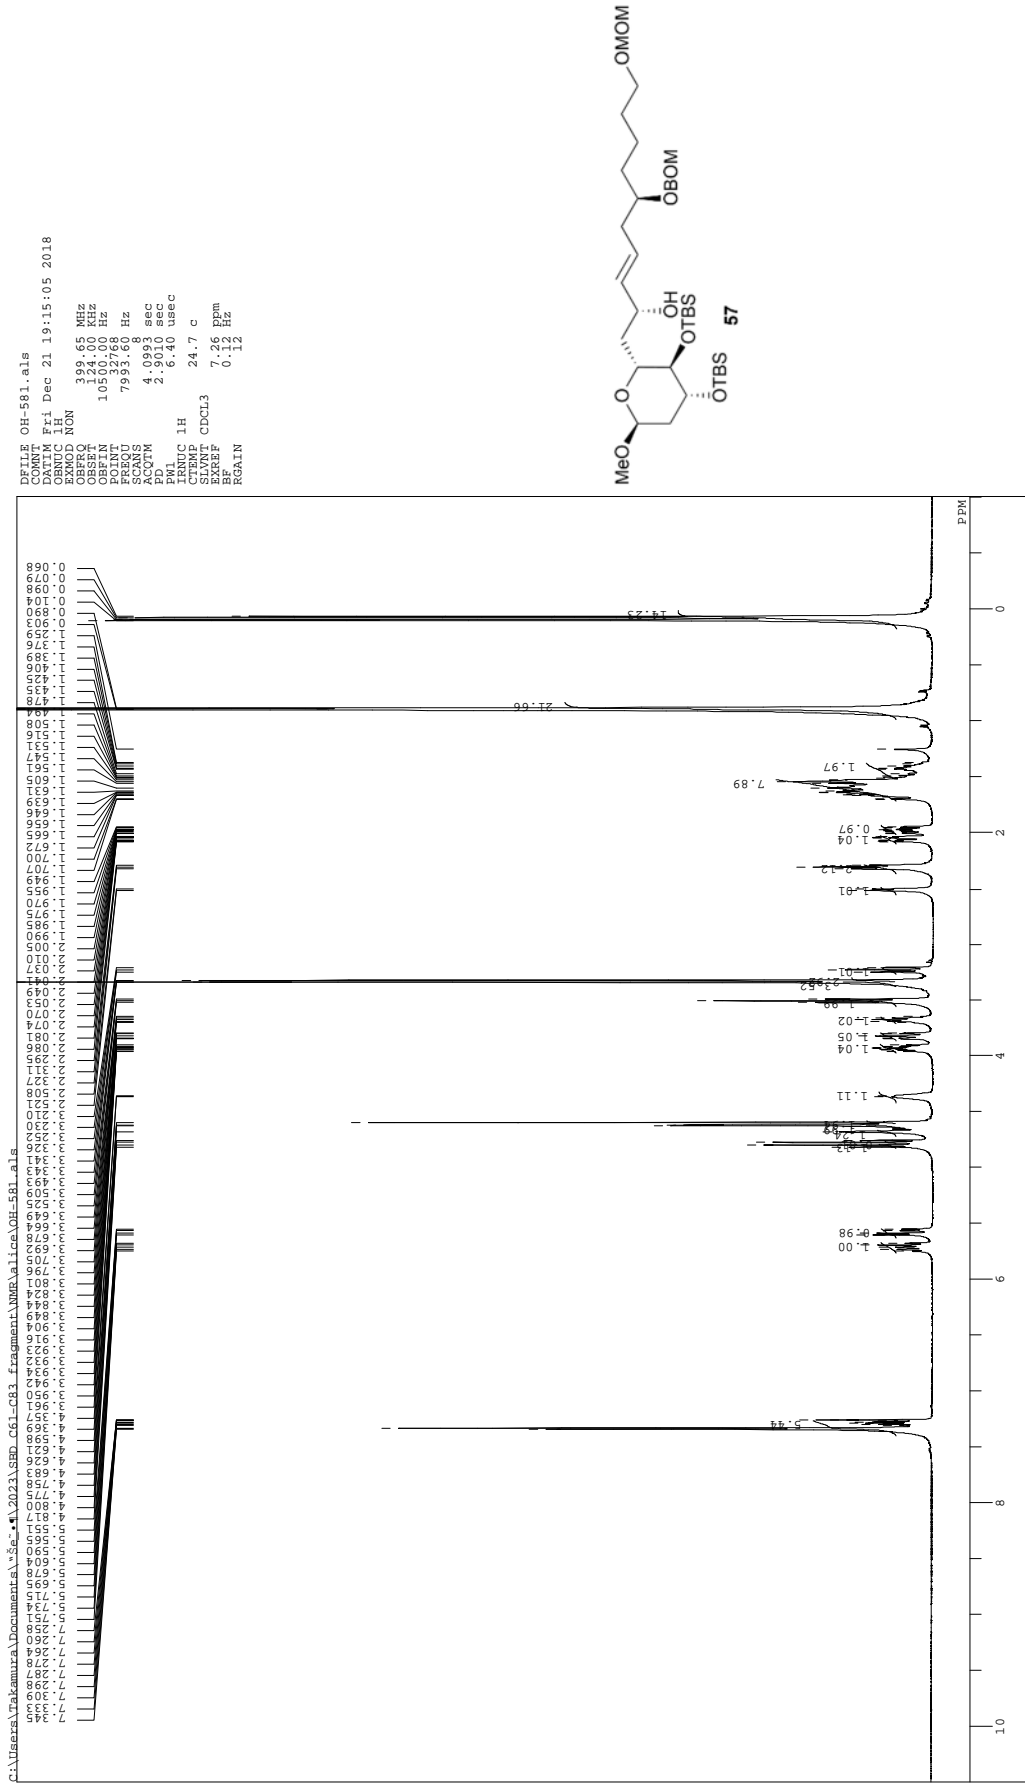

DFILF OH-581\_13c.als  
 COMNT  
 DATM Fri Dec 21 19:27:56 2018  
 EXMID BOM  
 EXMID BOM  
 OFREQ 100.40 MHz  
 OFS 0.00 Hz  
 OFSIN 10540.00 Hz  
 POINT 32768  
 FREQ 27173900 Hz  
 SFO 8  
 ACQTM 1.2859 sec  
 PD 1.7940 usec  
 INUC 1H  
 INUC 6.80 usec  
 CTMP CDCL3 26.5 c  
 EXMID BOM  
 EXMID BOM  
 BF 77.00 PPM  
 BF 2.00 Hz  
 RGAIN 24

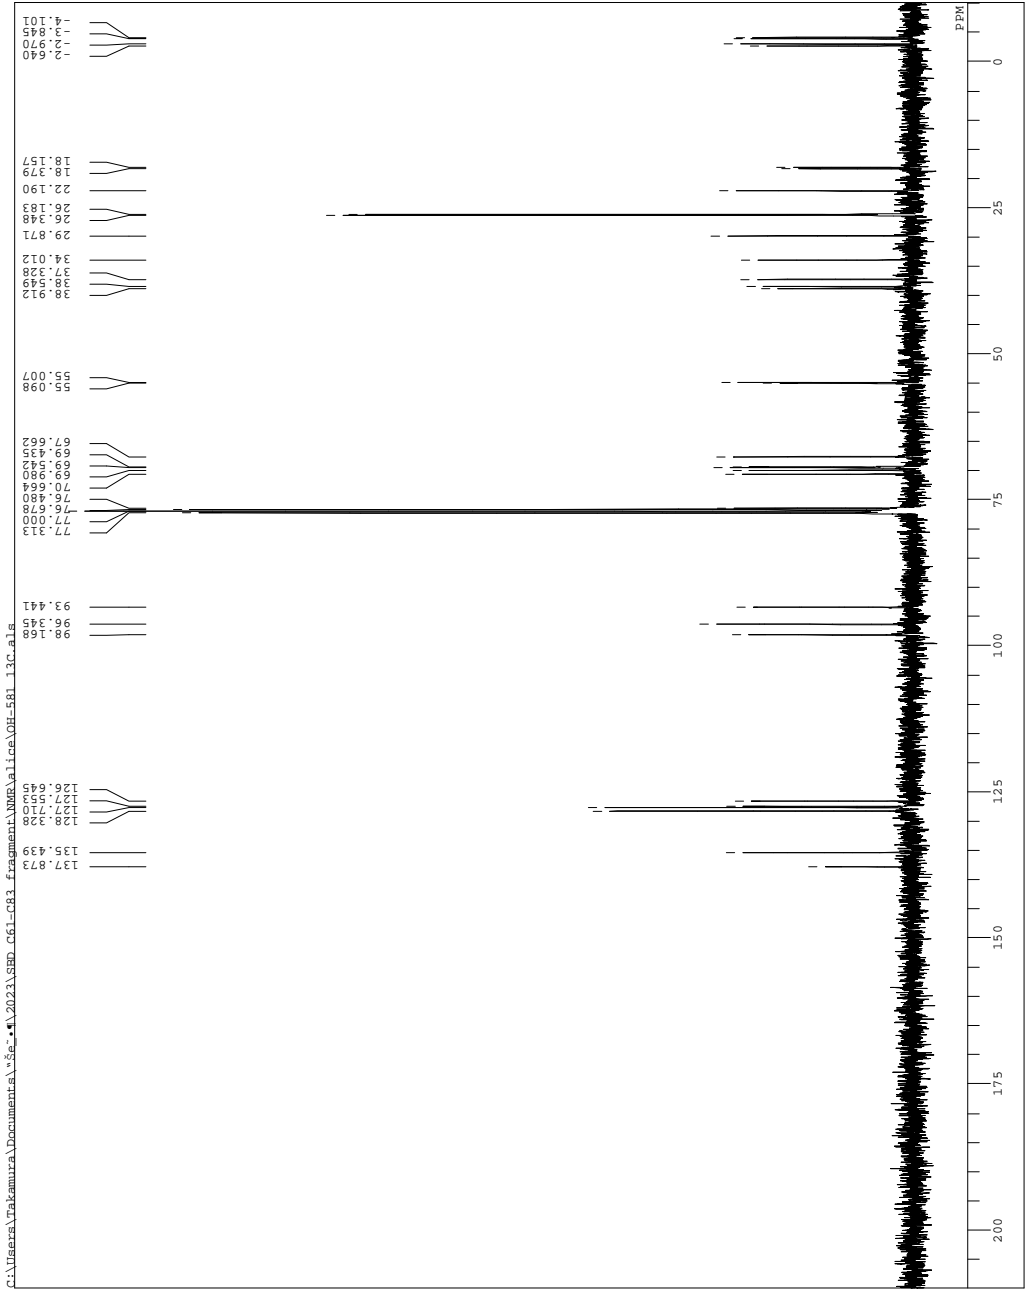

C:\Users\Ynakamura\Documents\Se...2023\SHD\_661\_c83\_Fragment\NMR\data\OH-582\_als  
 FILE OH-582\_als  
 DATE The Dec 25 17:57:08 2018  
 INSTR 1H  
 PULPROG zgpg30  
 PROCNO 1  
 AQ 1.00  
 ORBIT 1H  
 F2 399.65 MHz  
 F1 124.00 KHz  
 OFFSET 10500.00 Hz  
 A2 1.00  
 FREQ2 79831.60 Hz  
 SCANS 4.0000  
 PC 2.9010 sec  
 PD 6.40 usec  
 PM1 1H  
 PM2 1H  
 FIDRES 24.5 C  
 SFO 124.00 MHz  
 SOLVENT CDCl3  
 EXREF 7.26 PPM  
 RGAIN 0.14

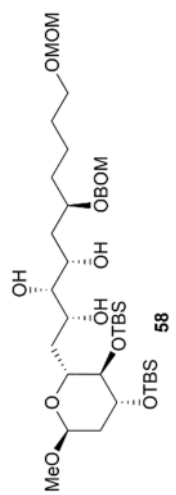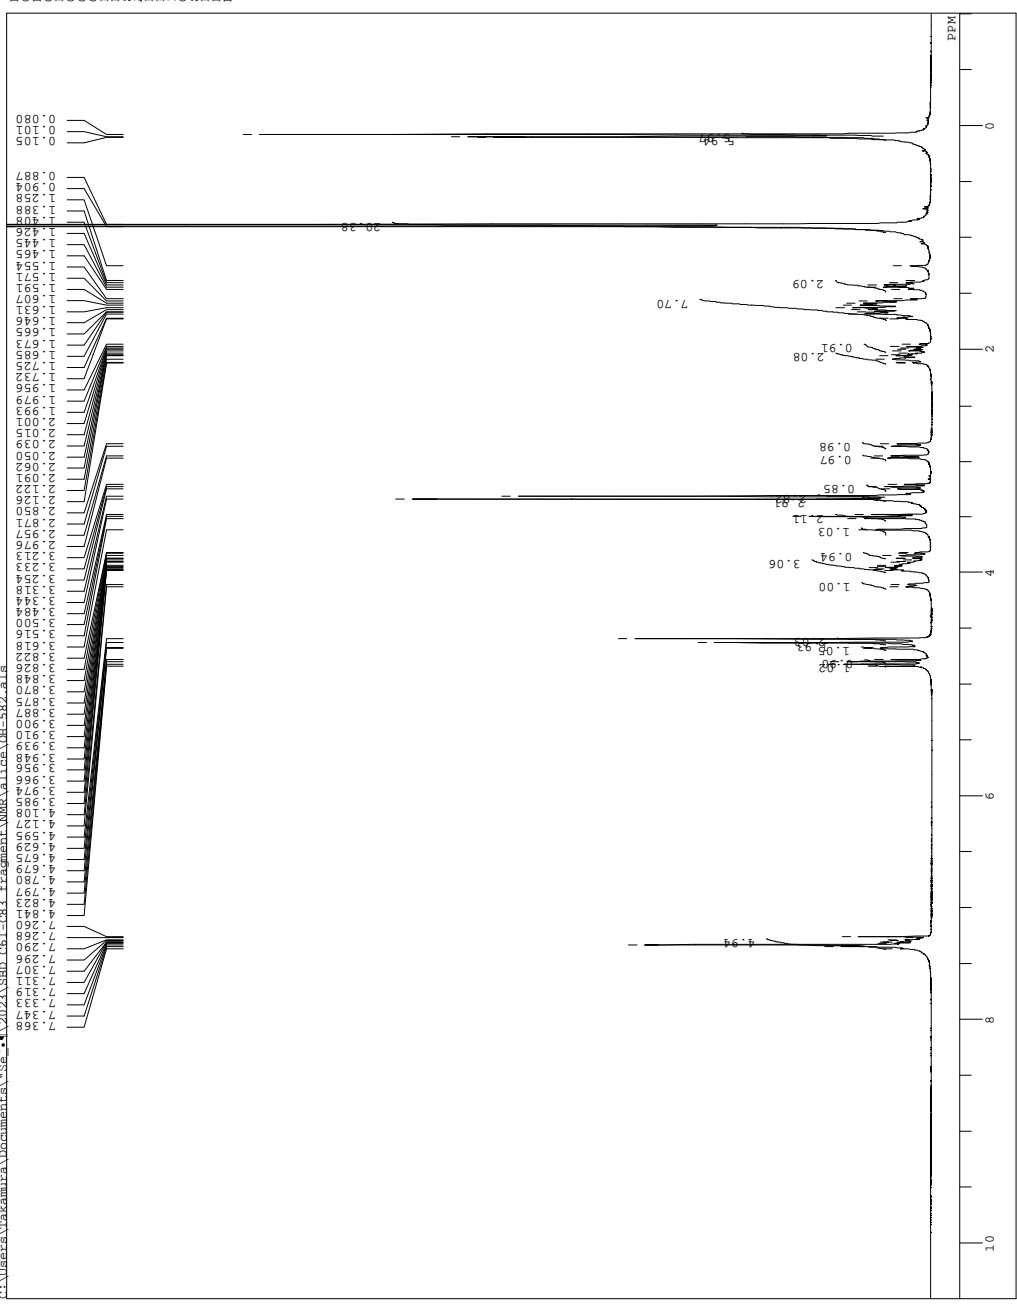



DFILE OH-582 13c.als  
 CONTM The Dec 25 18:13:15 2018  
 EXMTC 13C  
 EXMOD BCM  
 OBSF1 100.40 MHz  
 OBSF2 125.00 KHz  
 OBSF3 10500.00 Hz  
 PULPROG zgpg30  
 PCYCL 27137.90 Hz  
 SCANS 400  
 ACQTM 1.7039 sec  
 PUL 1.6780 usec  
 INTC 1H  
 SNU 26.4 c  
 SOLV CDCL3  
 EXREF 77.00 PPM  
 REFIN 2.00 Hz  
 RGAIN

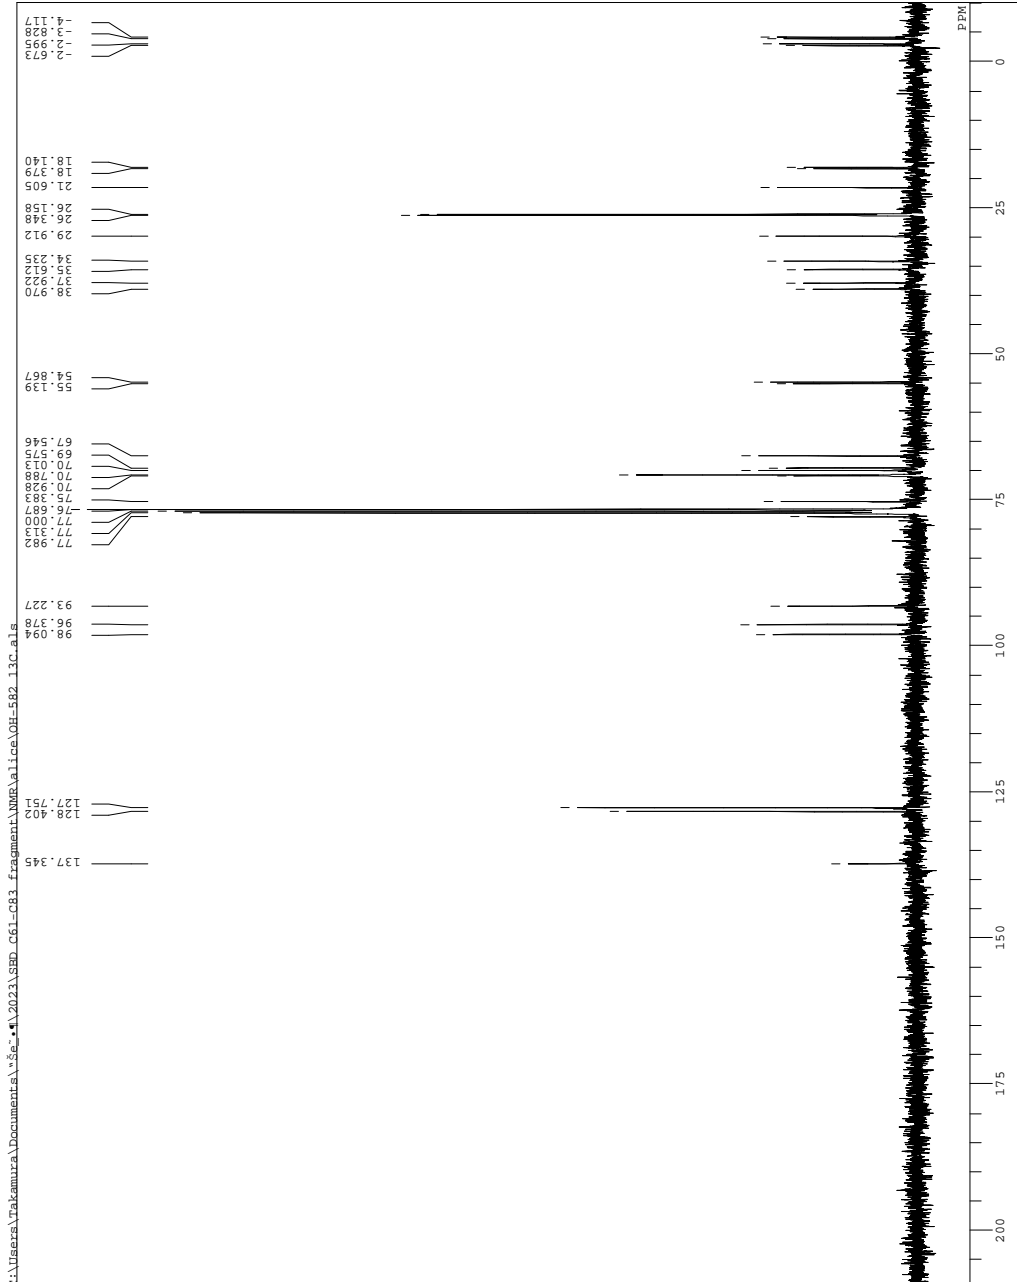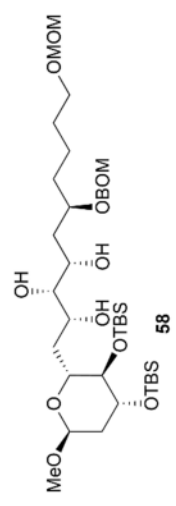

C:\Users\Trakamura\Documents\20231\_SBD\_C61\_093\_Fragment\NMR\1h\1h\TO\_448.a1z

DFILE TO-448.a1z  
COMPT 1h Mar 02 21:41:28 2018  
NAME  
PULSE 1h  
EXMOD NON  
OBPRQ 399.65 MHz  
OBPRQ 105500.00 Hz  
POINT 32768  
SCAN 7993.32 Hz  
ACQTM 4.0983 sec  
PUL 2.507 sec  
PULP 5.00 usec  
IENUC 1h 23.9 c  
CTEMP CDCL3 7.26 PPM  
EXREF BF 0.12 Hz  
RGAIN 23

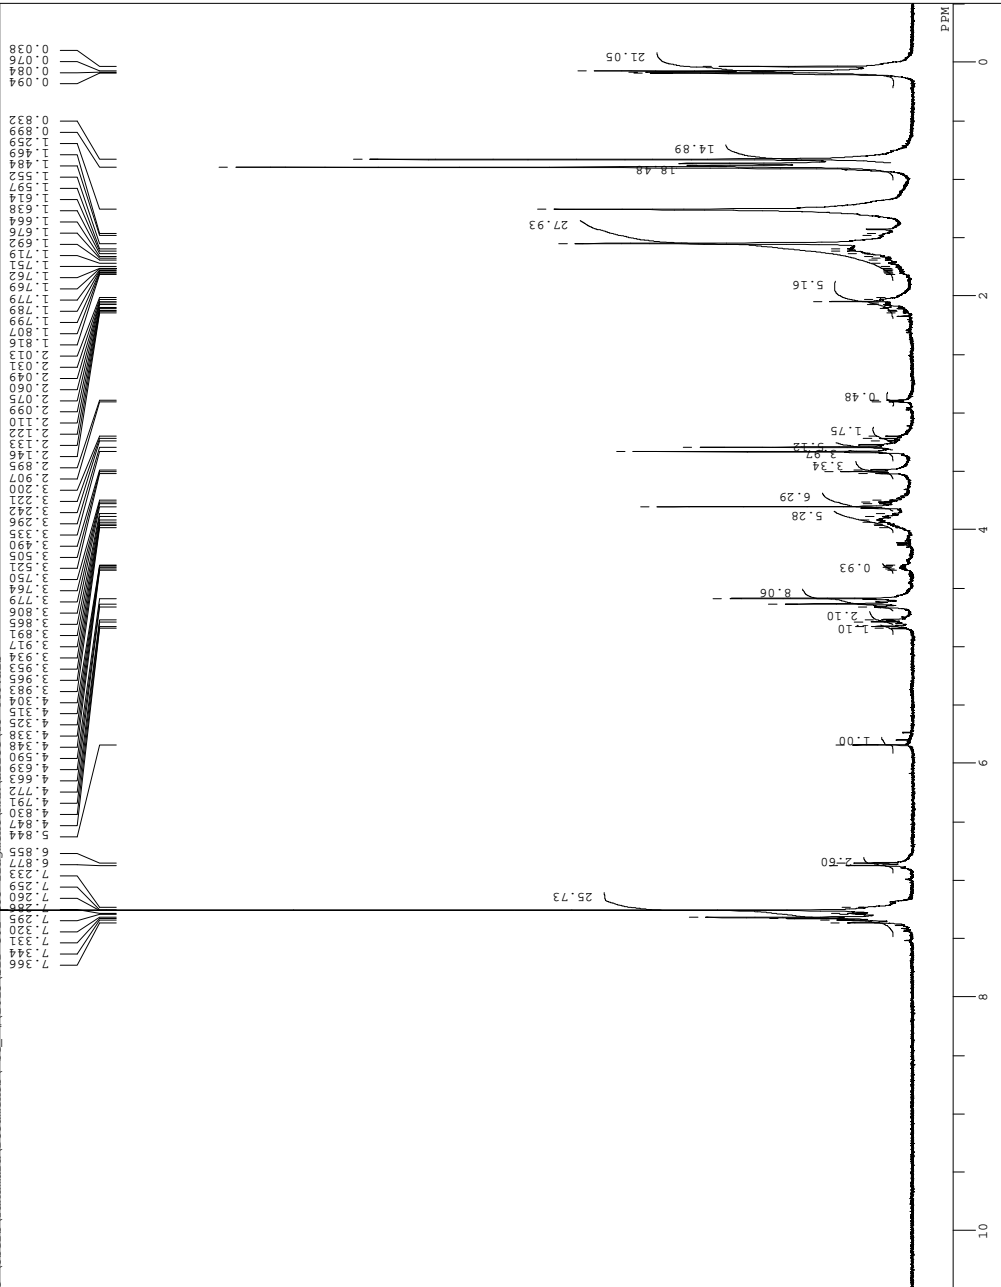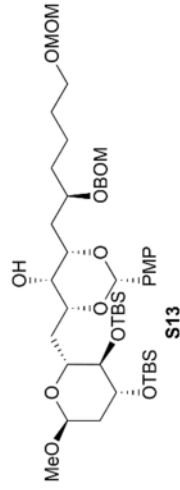

C:\Users\Tpkemura\Documents\... \2023\SED\_C61-C81\_Fragment\NMR\data\SI-104-re-13c\_als

DFILE SI-104-re-13c\_als  
 COMPI SI-104-re-13c  
 DATE 23-05-29 21:16:48  
 OPR C13  
 EXMOD s2pul  
 OBSFO 150.82 MHz  
 OBS 8.70 Hz  
 OFETM 8.70 Hz  
 POINT 32768 Hz  
 SCANS 37878.64 Hz  
 ACQTM 0.8651 sec  
 PD 2.1349 sec  
 PD 0.10 usec  
 IRENUC 10.0 c  
 CTEMP cdc13 77.00 ppm  
 EXPRF BF 0.12 Hz  
 RGAIN 60

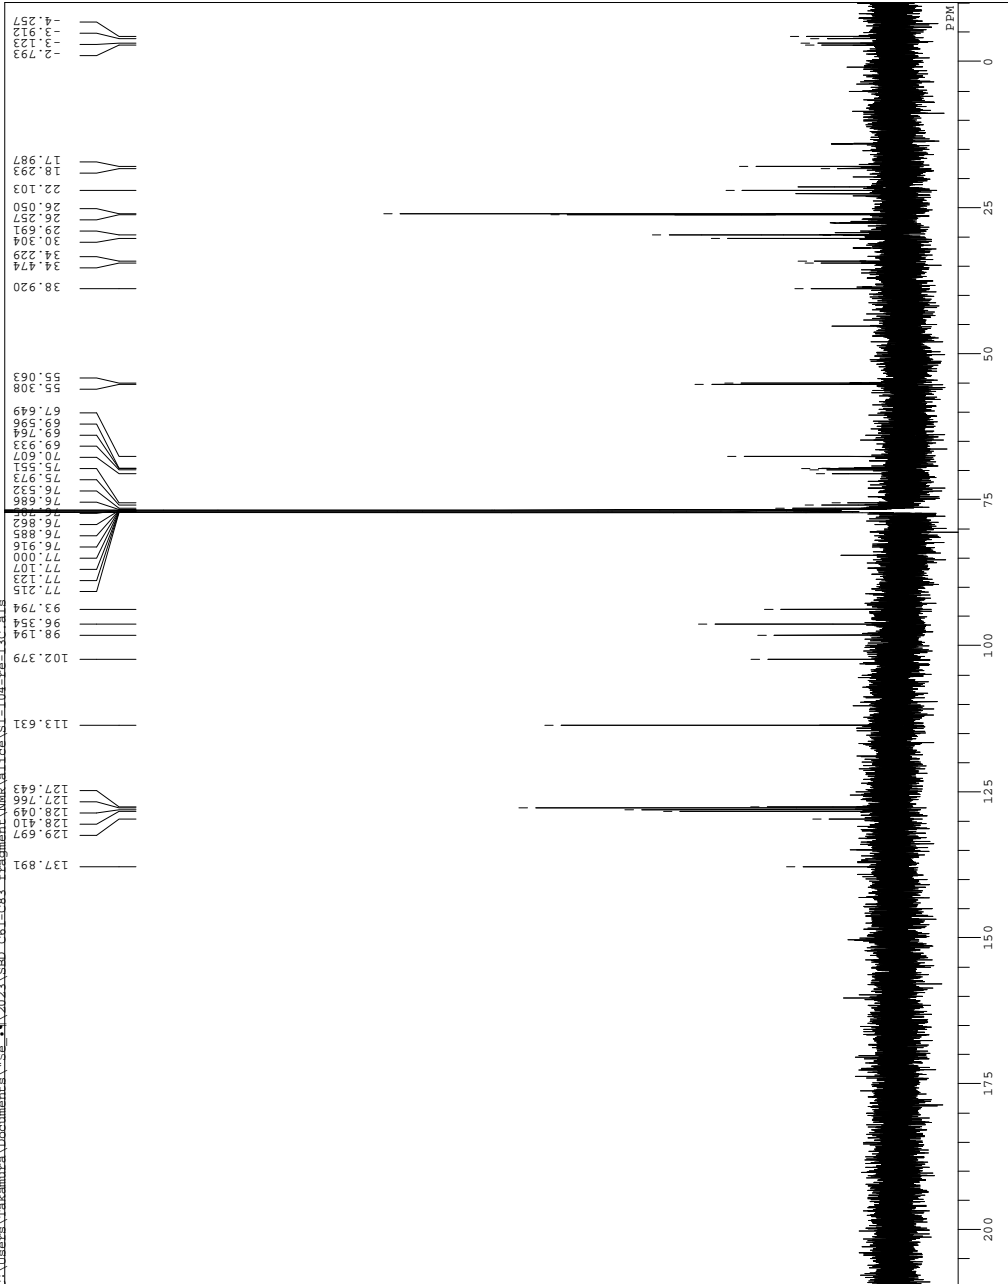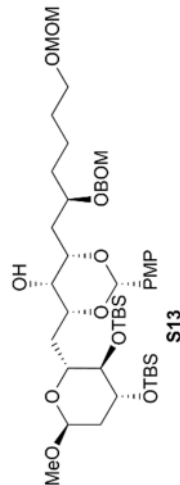

C:\Users\Takamura\Documents\Sei-4\2021\SED\_c61-cr3-Fragment\NMR\alic\OH-573\_als

DRFILE OH-573\_als  
 COMMT  
 DATIN Mon Dec 17 14:36:27 2018  
 EXMOD NON  
 OBRQ 398.65 MHz  
 OBRF 105204.00 Hz  
 POINT 32768 Hz  
 SREQ 7993.60 Hz  
 ACORN 4.0993 sec  
 PD 2.2010 sec  
 IEMUC 1H 6.40 usec  
 IEMUC 24.4 c  
 CTEMP CDCL3 24.4 c  
 EXPRF 7.26 ppm  
 BF 0.12 Hz  
 RGAIN 1.4

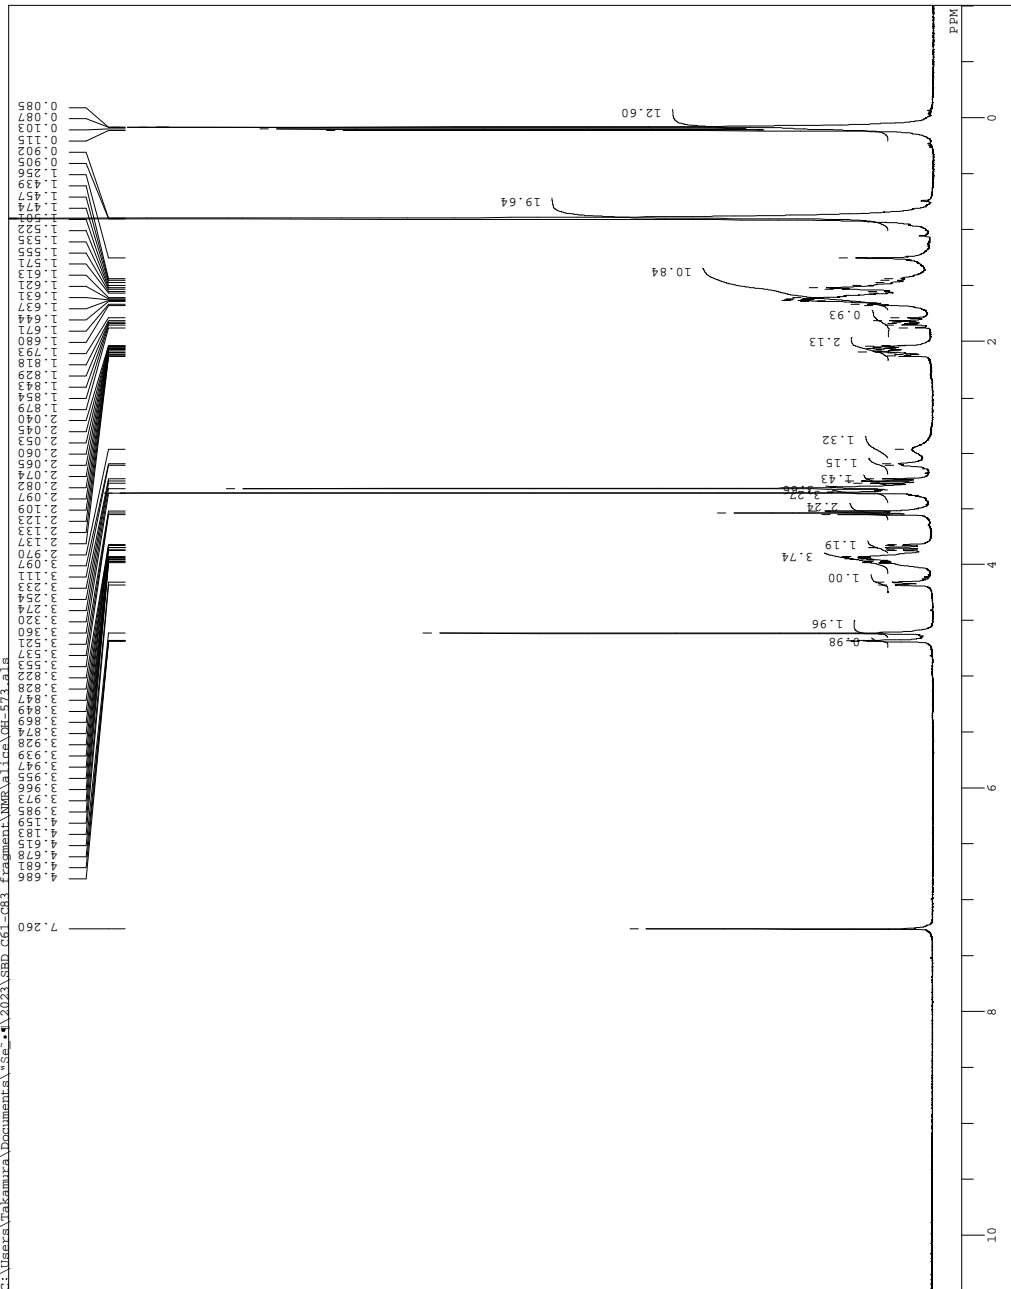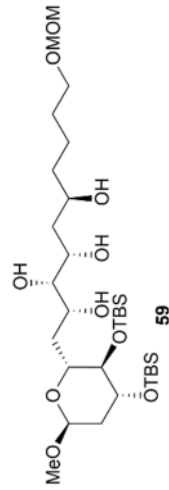

C:\Users\Takamura\Documents\Se\*\2023\8RD\_C61-C83\_Fragment\NMR\all\ce\OH=573\_13C\_2\_als

DATE OH-573 13C 2.als  
TIME 17:11:11  
DATE Mon Dec 17 15:48:03 2018  
DIR C:\Users\Takamura\Documents\Se\*\2023\8RD\_C61-C83\_Fragment\NMR\all\ce\OH=573\_13C\_2\_als  
NAME OH-573\_13C\_2.als  
PROC 13C  
PULPROG zgpg30  
SFO 100.625  
AQ 0.50000000  
RG 0.00000000  
ORBIT 100.40 MHz  
ORSET 125.00 KHz  
NUC1 13C  
NUC2 13C  
P1 1.05000000 Hz  
P2 27133.90 Hz  
FREQ 27133.90 Hz  
SCANS 3372  
SOLVENT CDCL3  
PD 1.7940 sec  
PC 6.80 usec  
PM 1.00000000  
PR 26.3 C  
TE 300.2 K  
SOLVENT CDCL3  
SILVER 77.00 ppm  
EXPT 2.24 Hz  
RGAIN

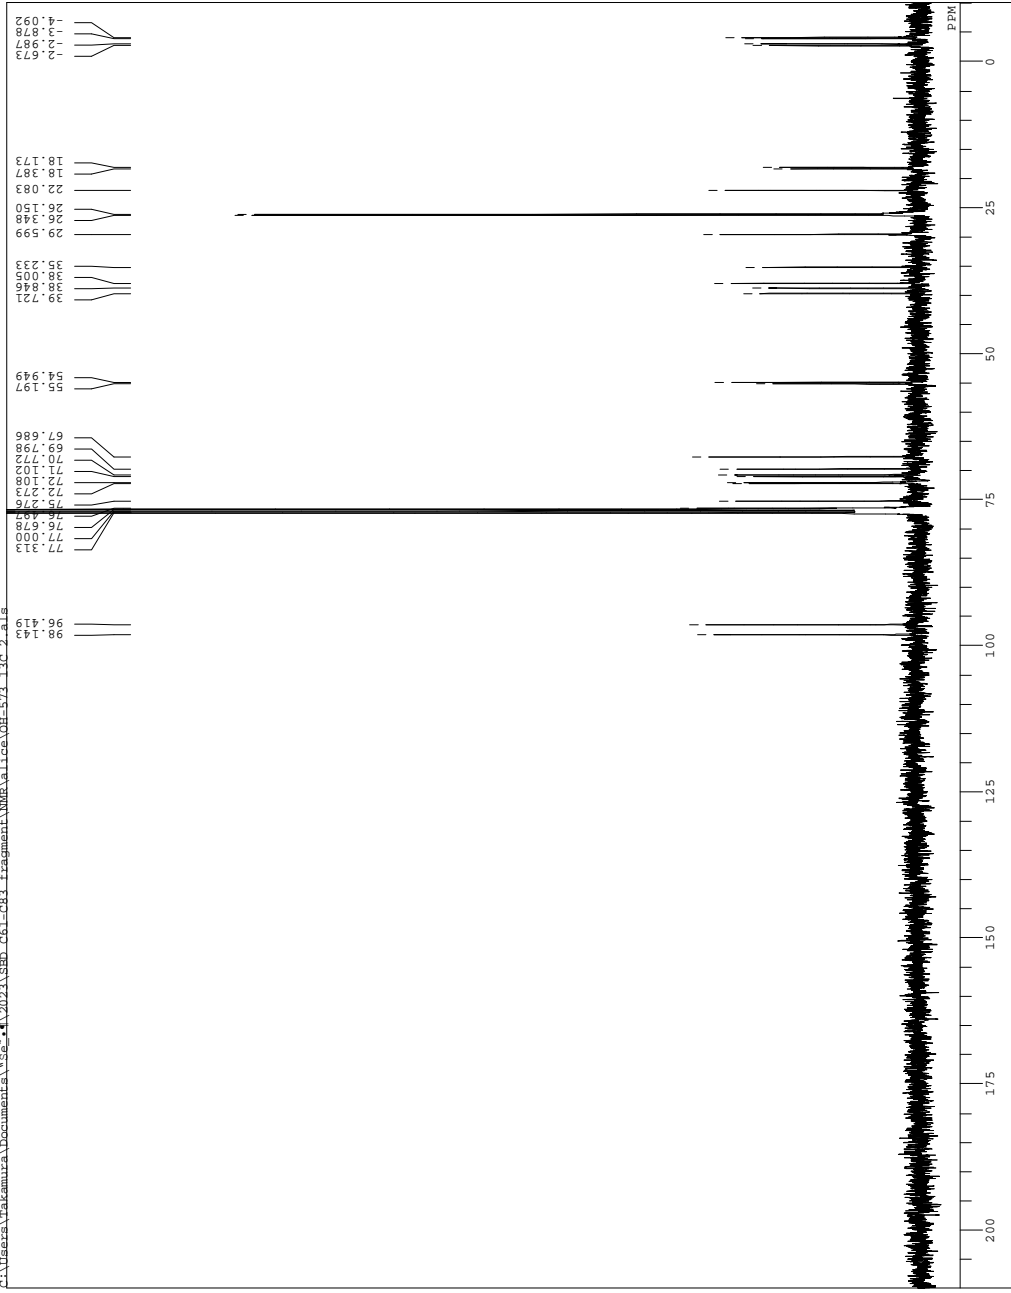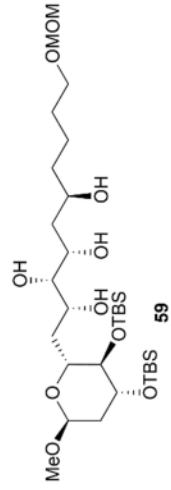

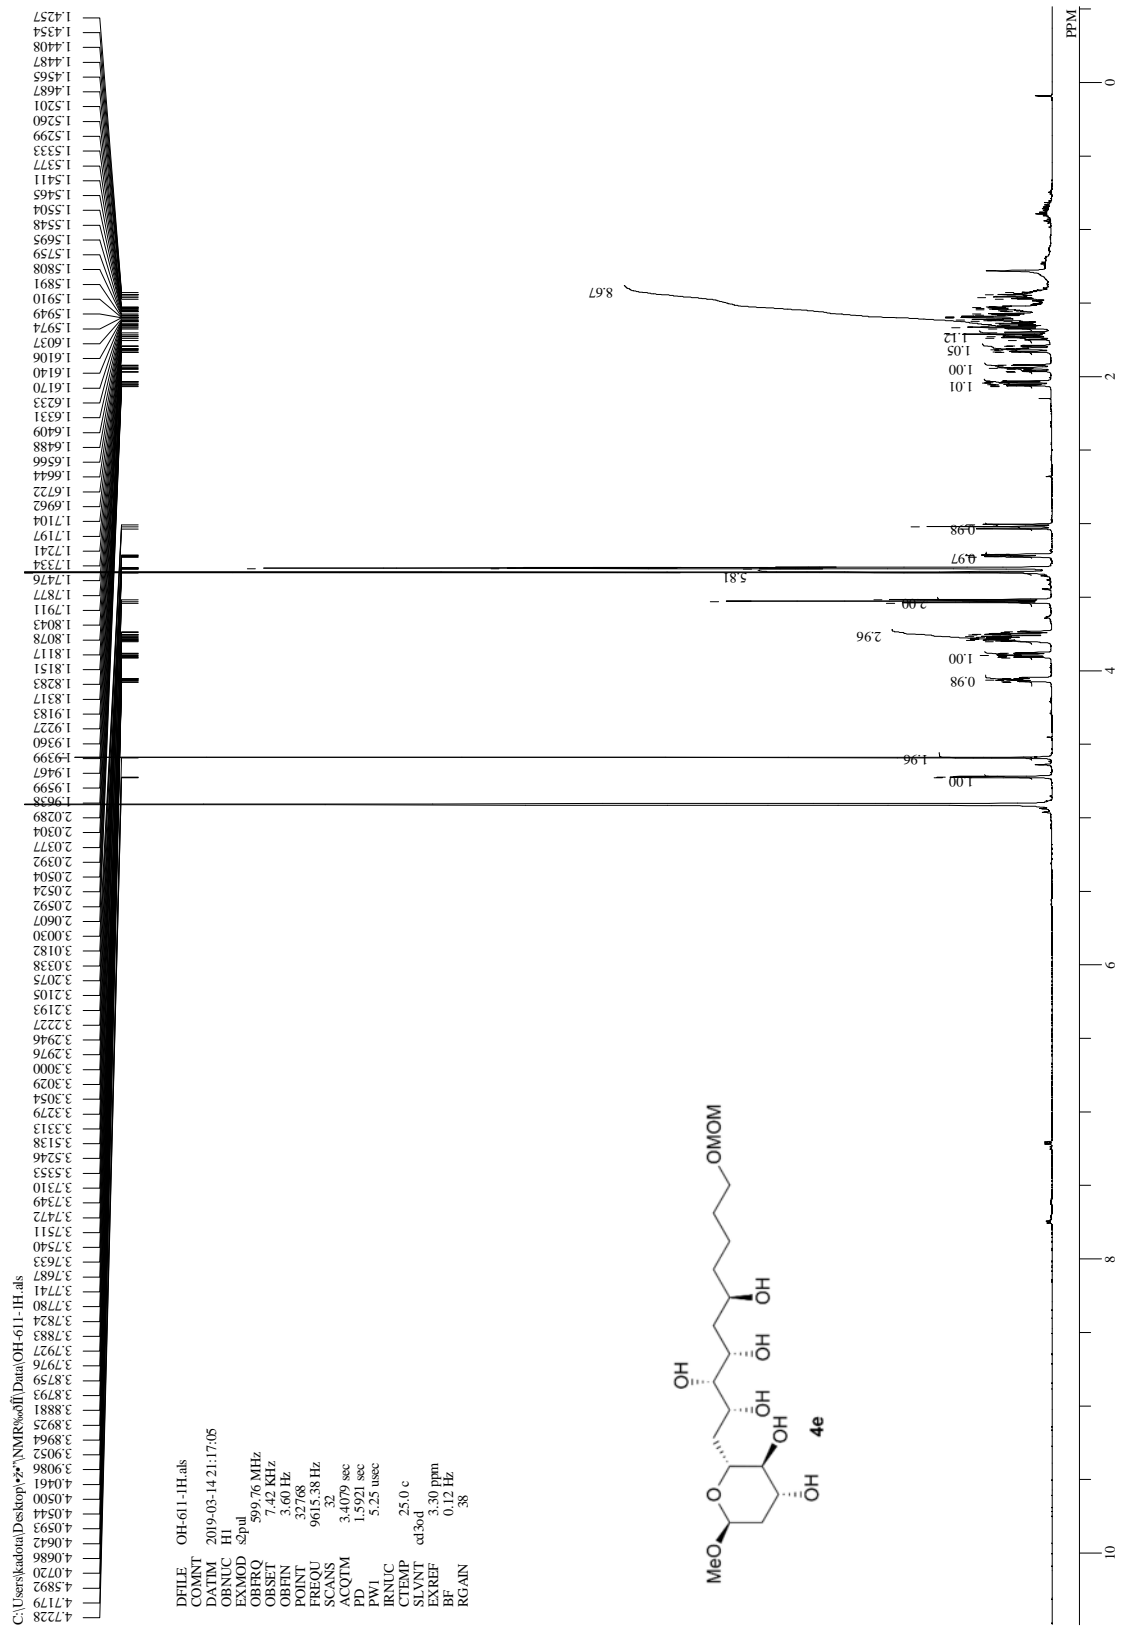

F:\3\*\_\*\_2023\_01\_04\NMR\data\OH-611-13c.als

DFILE OH-611-13c.als  
 CONT 2019-03-14 21:30:23  
 OBNUC C13  
 EXMOD s2pul  
 ES 150.82 MHz  
 OBSF 77.32 KHz  
 OFPIN 3.00 Hz  
 OFS 0.00 Hz  
 FREQ 378787.9 Hz  
 SCANS 64  
 ACQTM 0.8651 sec  
 PUL 2.575 usec  
 INTC 25.0 c  
 LN 1  
 SOLV cd3od  
 EXREF 49.00 PPM  
 REFIN 0.12 Hz  
 RGAIN 0.0

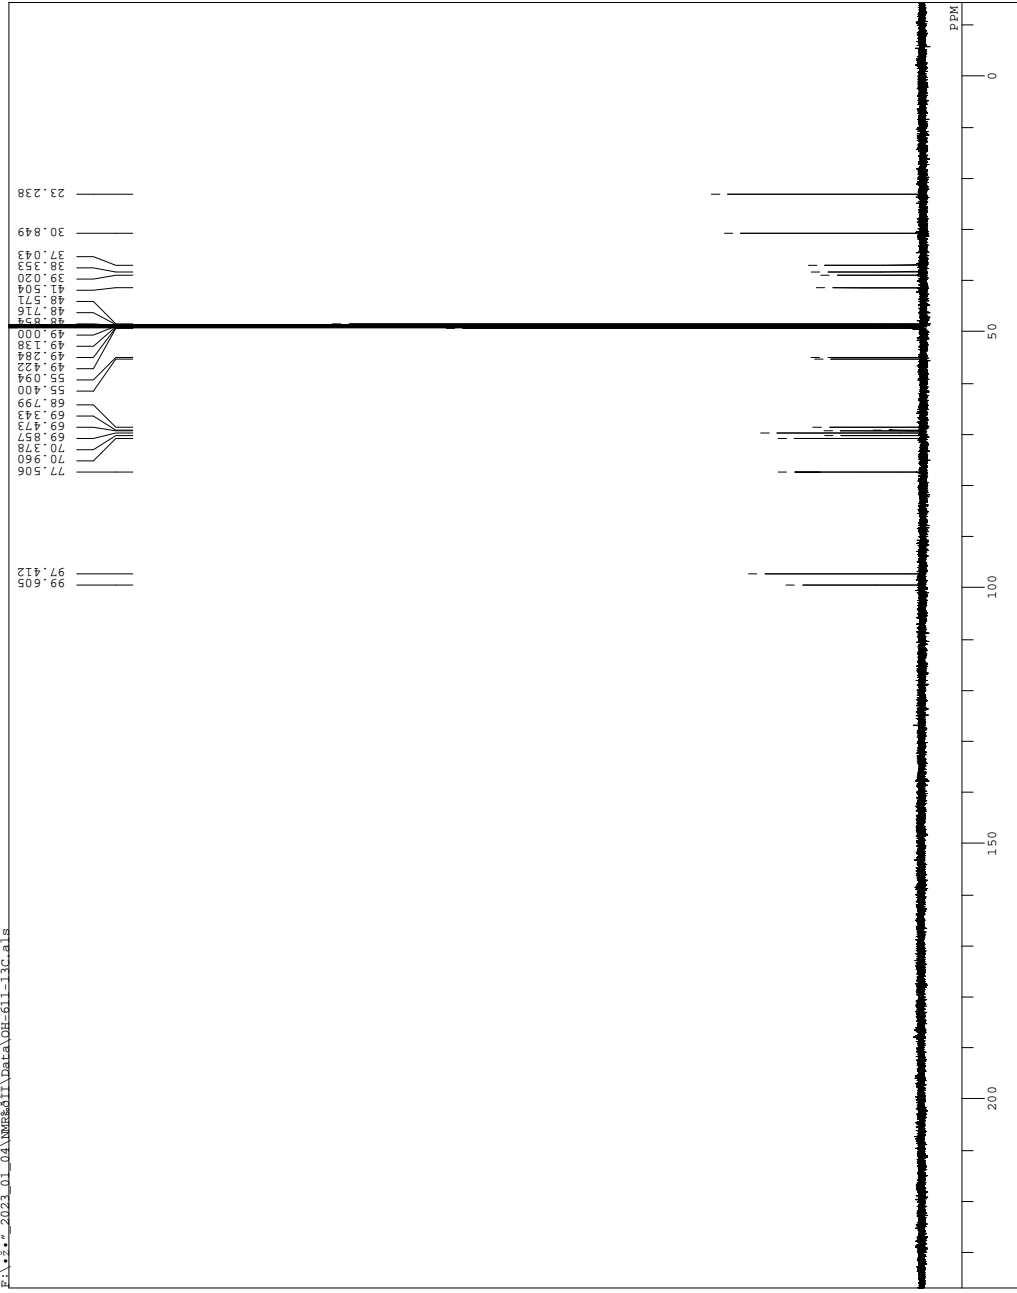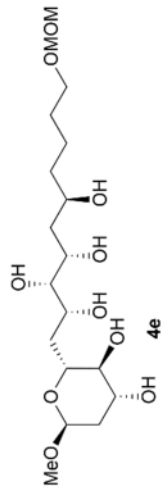

```

exp3 gCOSY
=====
DATA   MER 15 2019   IN          PEAK#   IN
SOLVENT CD3OD       SPT#1     6120
SAMPLR  4000       SPT#1     4096
ACQUISITION  SERIAL          SPECIAL
AV      9415.4   temp   not used
AT      0.150   gain    38
TP      2884   SPT#1
ED      4000       F2 PROCESSING 0
SI      15       F2          0.001
SI      1.000   SPT#1   not used
SI      8       F2          not used
SI      4096   SPT#1
=====
2D ACQUISITION  F1 PROCESSING
SI      9415.4   SPT#1   -0.013
SI      128   SPT#1   not used
SI      128   SPT#1   not used
SI      4096   SPT#1
=====
PARAMETERIZATION  SPT#1   DISPLAY  4096
=====
PARAMETERIZATION  SPT#1   DISPLAY  4096
=====
NAME      SPT#1   DISPLAY  4096
=====
TRANSMITTER  WP      3051.8
LN      RL   SPT#1   -185.7
SFRq    599.787   SPT#1   3633.9
tor     599.7   F1L    3207.9
tpw     10.500   F1L    3211.2
P#      CHANNEL#2   F1L    1879.2
=====
SPT#1#2   S102   PLOT  351.9
SFR      0.001000   WC
SFRatio  1.000   AC   9.8
gstab   0.000500   WCD 208.9
=====
INCOUPLER  CL3   WCD  53.9
=====
SPT#1   SPT#1   SPT#1   4
=====

```

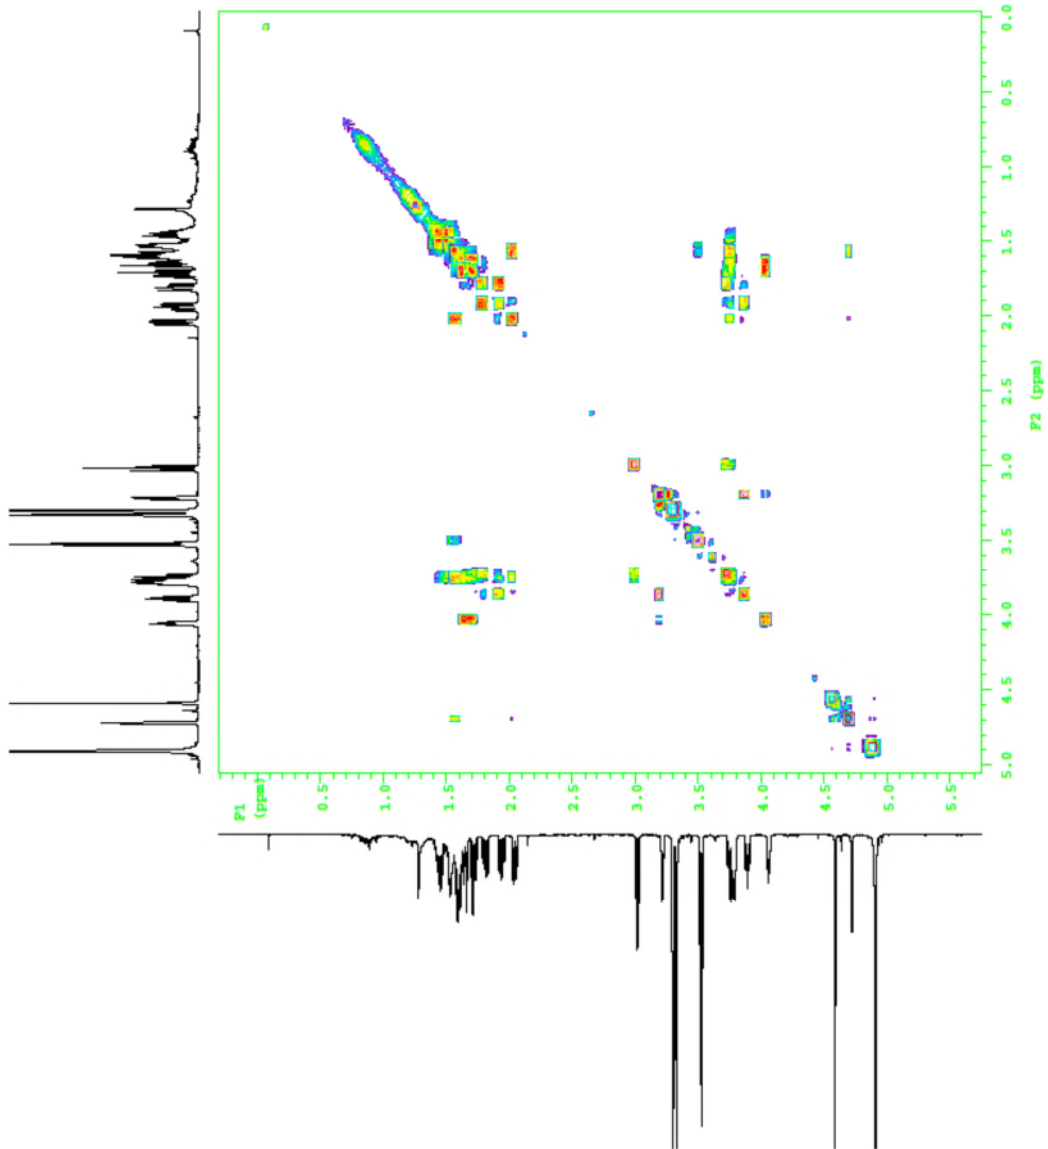

$^1\text{H}$ - $^1\text{H}$  COSY (600 MHz,  $\text{CD}_3\text{OD}$ )

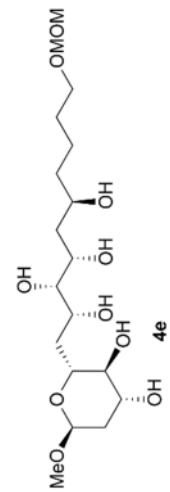





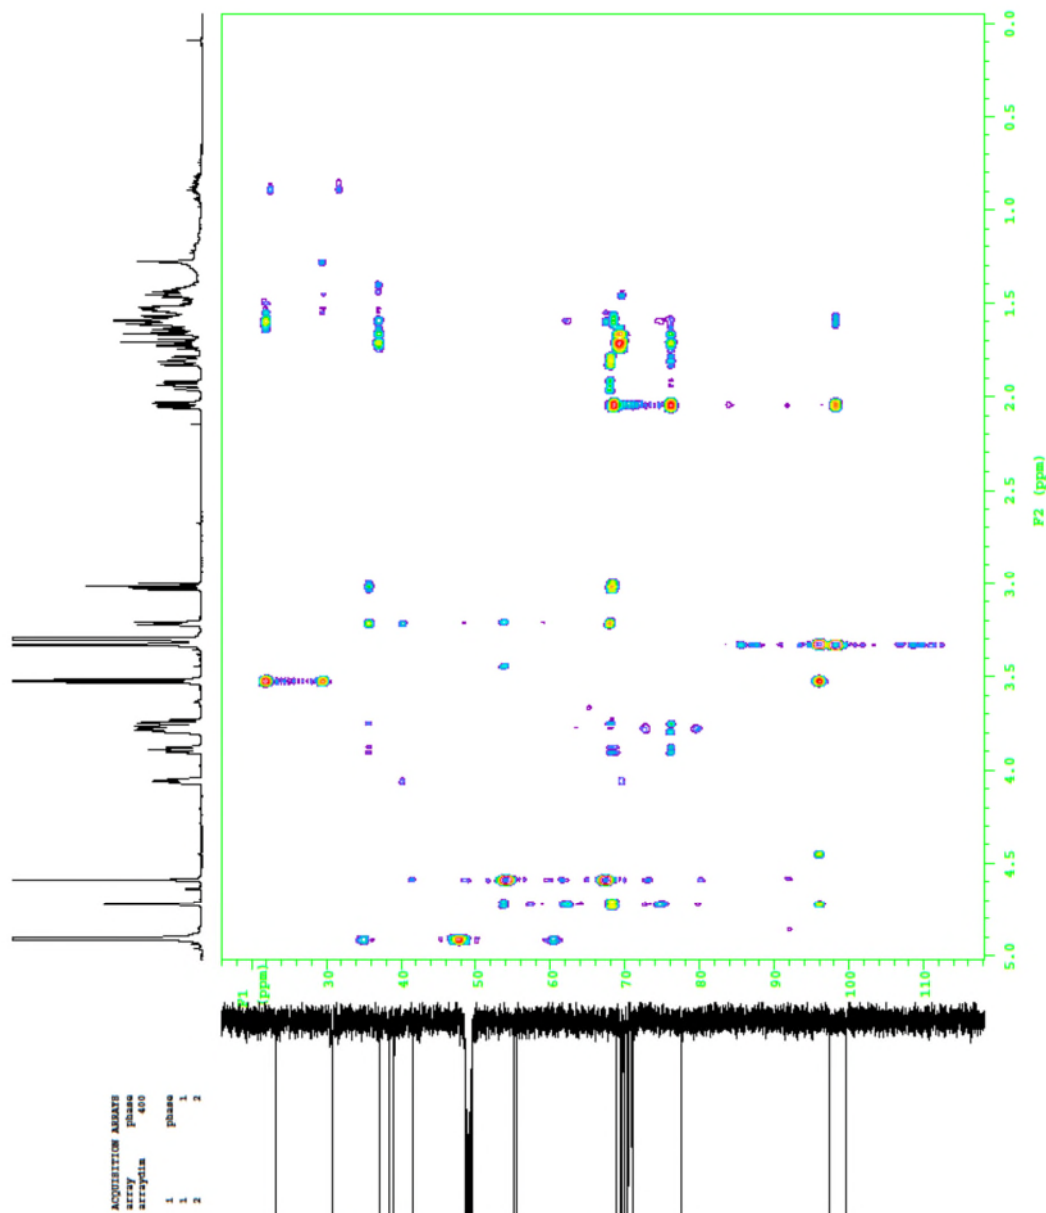

exp5 gsmc  
 date Mar 14 2019 hr  
 name\_0000000000  
 sample\_0000000000  
 acq 9615.4 temp not used  
 at 0.150 lamp not used  
 sp 2884 gain  
 fr 4000 spin  
 as 1.00  
 ds 32  
 ss 0.001000  
 us 32  
 us 0.001000  
 2D ACQUISITION 9615.4 1500  
 sw 36199.1 f2 0.001000  
 ut 200 gscad 0.000500  
 phase arrayed f2 PROCESSING  
 PREPARATION 9615.4  
 acq 0.150  
 wsc 4894  
 TRANSMITTER 9615.4  
 tx 0.005  
 atfq 599.767 g5a1 not used  
 tor 599.7 g5a1 hp  
 tpr 10.000 fill DISPLAY 2048  
 P ENCOUNTER -28.2  
 ds 2037.7  
 dsz 1542.4 gpa 2483.9  
 ds mm wpl 15432.9  
 ds dszwa wa0\_consumer rfl 1311.3  
 dsz 31008 f2 0  
 dsz 146 gpa 2344.0  
 dsz 56 f2p1 2344.0  
 pow 13.100 PLDT 381.9  
 11ch 146.0 ac 5.8  
 12ch 8.0 wsc 208.9  
 ac2 0  
 ac3 133  
 ac4 133  
 al odb av

HMBC (600 MHz, CD<sub>3</sub>OD)

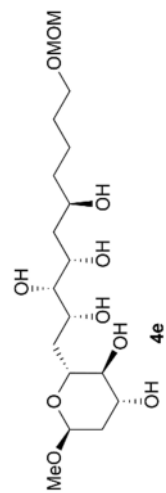

C:\Users\TakaMura\Documents\se\_4\2023\SRM\_061-C83\_Fragment\NMR\Alice\OH-586\_a1s  
 FILE OH-586\_a1s  
 COMPT Thu Dec 27 21:02:21 2018  
 CONV 1H  
 ORNTC 1H  
 EXMOD NON  
 OBSFQ 398.65 MHz  
 OBSF1 134.00 MHz  
 ORFIN 10500.00 Hz  
 POINT 793768 Hz  
 SCANS 32  
 ACQTM 4.0993 sec  
 PUL 2.640 msec  
 PW 6.40 msec  
 IRNUC 1H  
 STNUC 24.7 c  
 STREF CDCL3  
 EXREF 7.26 ppm  
 BF 0.12 Hz  
 RGAIN 14

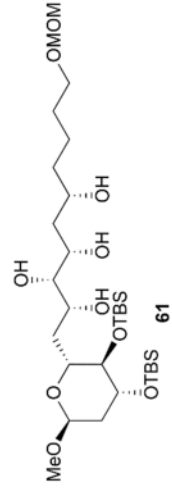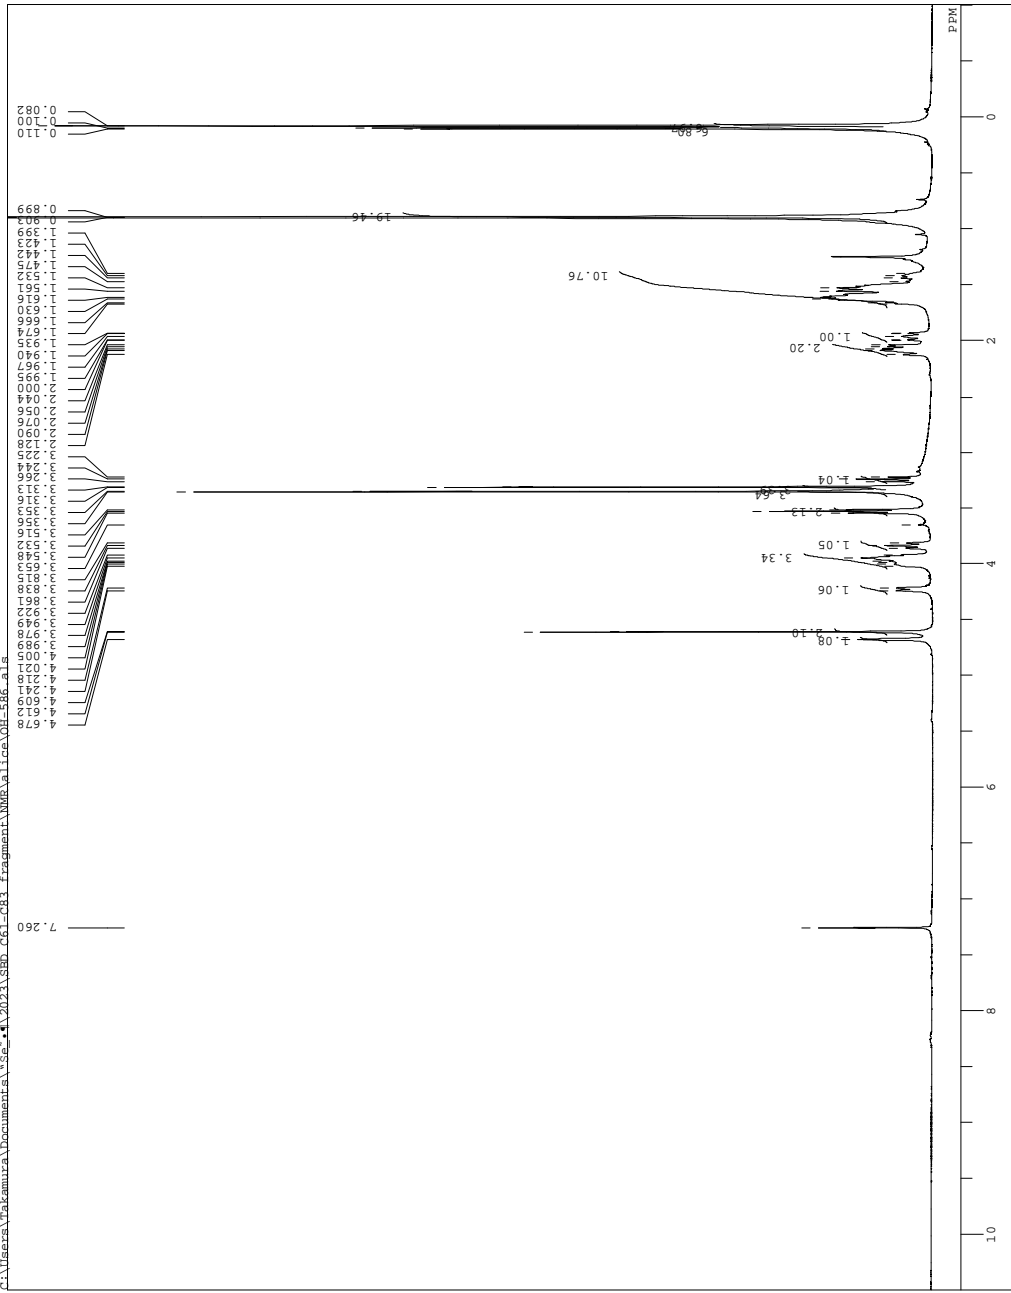

DEFILE OH-586 13C.als  
 DATE\_ TIME Thu Dec 27 21:22:39 2018  
 ORNVC 13C  
 ORNVC BCM  
 ORNVC 100.40 MHz  
 ORNVC 125.00 KHz  
 ORNVC 10500.00 Hz  
 FREQ0 271731.90 Hz  
 SCANS 1.3884  
 PCQTM 1.7240 sec  
 PM1 6.80 usec  
 IRMVC 1H  
 IRMVC 26.3 C  
 SOLVT CDCl3 77.00 PPM  
 EXREF 2.24 Hz  
 RGAIN

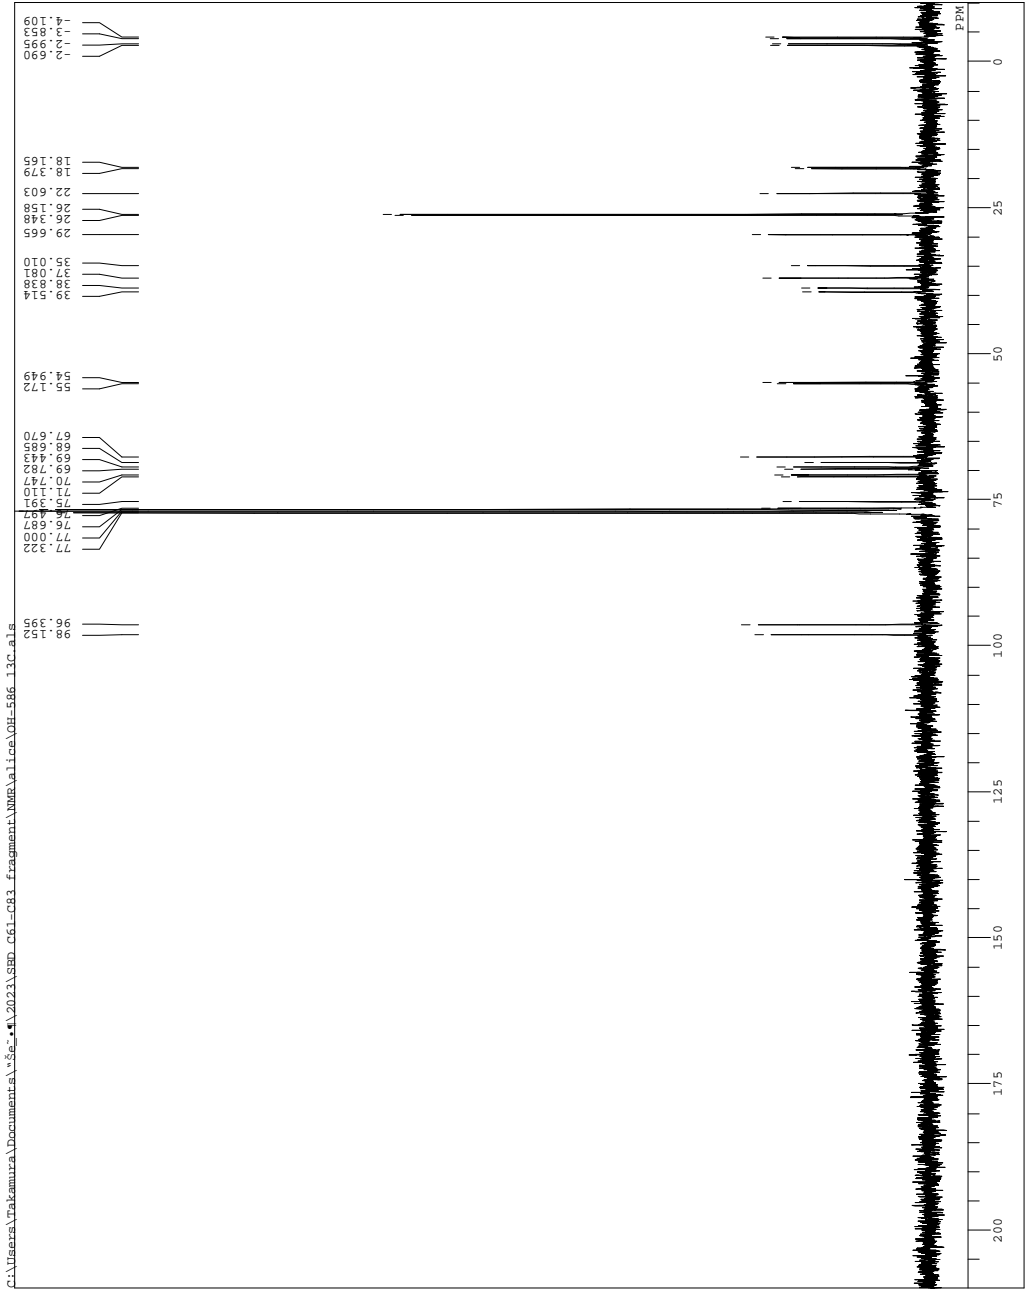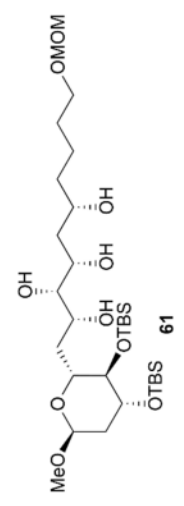

C:\Users\kadom\Desktop\2\*\NMR\%off\Data\KH-53-1H.xls

4.7242  
4.7188  
4.8877  
4.1900  
4.1141  
4.1097  
4.1019  
4.0975  
3.9062  
3.9028  
3.8944  
3.8910  
3.8886  
3.8873  
3.8773  
3.8739  
3.8201  
3.8113  
3.7976  
3.7888  
3.7829  
3.7780  
3.7741  
3.7716  
3.7692  
3.7633  
3.7580  
3.7516  
3.7394  
3.7349  
3.5368  
3.5260  
3.5153  
3.3378  
3.3387  
3.3328  
3.3284  
3.3054  
3.3029  
3.3000  
3.2971  
3.2946  
3.1977  
3.1963  
3.1938  
3.1865  
3.1840  
3.1816  
3.0837  
3.0231  
3.0079  
2.0612  
2.0592  
2.0524  
2.0504  
2.0392  
2.0309  
2.0289  
1.9761  
1.9565  
1.9521  
1.9389  
1.9350  
1.8254  
1.8215  
1.8073  
1.8014  
1.7975  
1.7848  
1.7815  
1.7769  
1.7725  
1.7598  
1.7549  
1.7530  
1.7486  
1.7358  
1.7314  
1.6263  
1.6223  
1.6160  
1.6101  
1.6057  
1.6003  
1.5964  
1.5945  
1.5905  
1.5886  
1.5749  
1.5690  
1.5490  
1.5333  
1.5211  
1.5093  
1.5000  
1.4893  
1.4849  
1.4805  
1.4765  
1.4584  
1.4540  
1.4423  
1.4379  
1.4350  
1.4301  
1.4139

DEFILE KH-53-1H.xls  
COMINT KH-53-4-1H\_Data  
DATIM 2020-02-12 20:58:40  
ORNTUC HI  
EXMOD S2p  
PULPROG zgpg30  
FREQ 99.6276 MHz  
ORSET 7.42 kHz  
ORFIN 3.60 Hz  
POINT 32768  
FREQ 9615.38 Hz  
SCANS 32  
ACQTM 3.4079 sec  
PD 1.5921 sec  
PWL 5.25 usec  
SOLVENT cd3od  
CTEMP 25.0 c  
SLVNT cd3od  
EXREF 3.30 ppm  
BF 0.12 Hz  
RGAIN 42

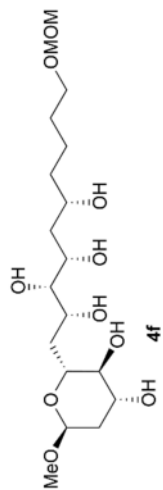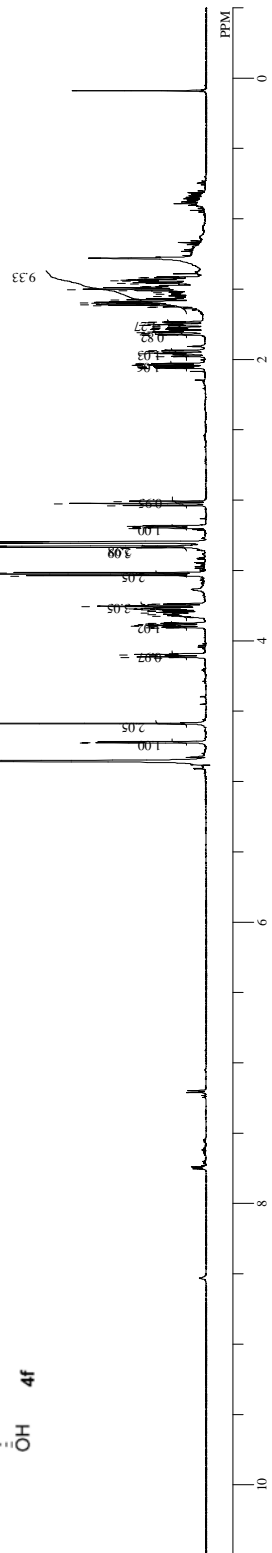

C:\Users\katom\Desktop\4f-1\NMR\%d\1\Dat\KH-53-13C.xls

```

DTITLE KH-53-13C.xls
COMINT KH-53-13C Data
DATIM 2020-02-12 21:03:04
OBRNUC C13
EXMOD s2pul
PULPROG zgpg30
PROBHD 5mm QNP 1H/13
PULPROG 150.82 MHz
OBSET 7.32 KHz
OBFIN 3.00 KHz
POINT 32768
SOLVENT DMSO-d6
F2 378.7879 Hz
AQ 6.0000000 sec
RG 0.8651 sec
ACQTM 2.1349 sec
PD 5.75 usec
PW1 6.0000000 usec
IRNUC 13C
CTEMP 25.0 c
SLANT cdBod
EXREF 49.00 ppm
BF 0.12 Hz
RGAIN 60
  
```

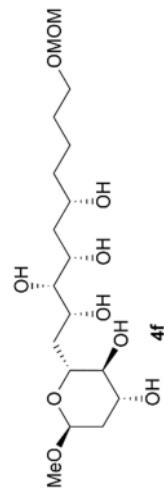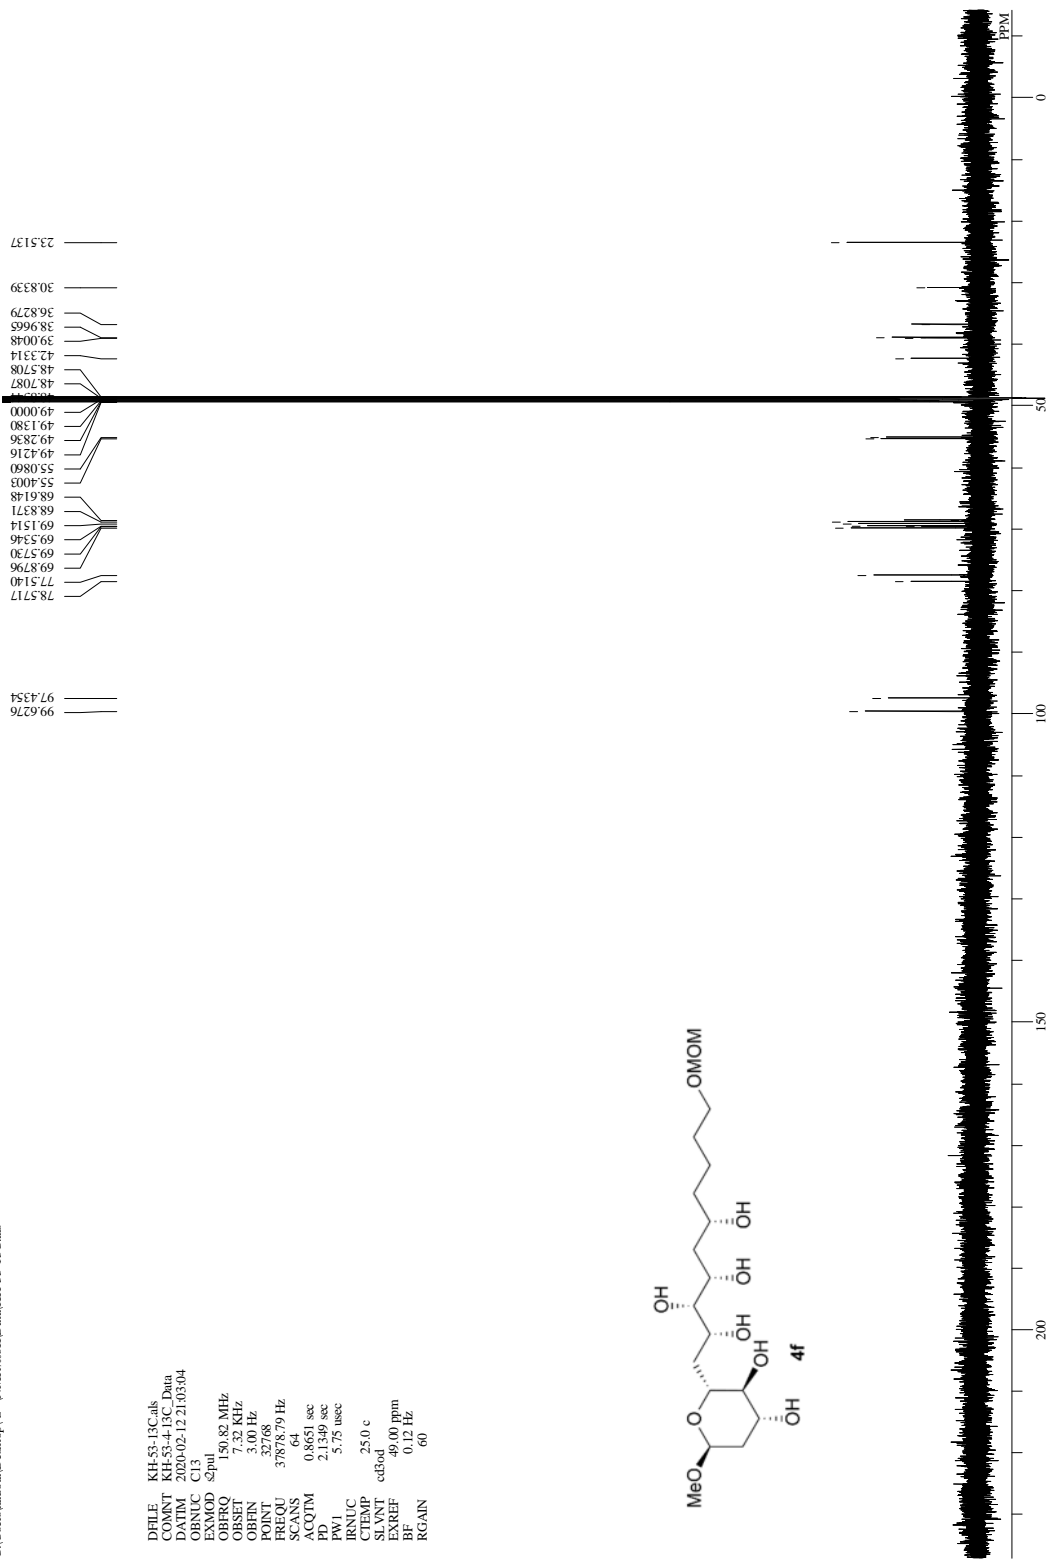

```

EX-13-4-gcomf_data
exp3 gcomf
=====
SAMPLE          PLACE
Date Feb 12 2020 1a
solvent cd3od
sample          bagivi
=====
ACQUISITION
nu  3415.4  name  not used
sc  1500  op1a  36
sp  2884  op1a  36
fr  4000  F2 PROCESSING  0
as  32  ab  -0.075
cl  1.000  abs  not used
dl  1.000  abs  not used
=====
2D ACQUISITION
nu  3415.4  ab1  F1 PROCESSING  0
sc  256  ab1a  not used
sp  256  ab1a  not used
dl  0  p1001  lp
=====
PREPARATION
nu  4096
strmode  n  f1  DISPLAY
wt  n  sp  -28.7
=====
TRANSMITTER
nu  4096  w1  2135.9
fr  4000  w1  2135.9
afreq  599.767  w1  3441.4
tof  599.7  r1l  3390.5
lpre  59  rfp  3379.2
pw  10.500  rfl1  3389.6
=====
GRAVIMETRY
nu  4096  w1  PLOT 351.9
sp  256  w1  256
stratio  1.000  w2  9.8
grlab  0.000500  w23  208.9
=====
ENCODING
nu  4096  w1  131
sc  256  w1  131
sp  256  w1  131
=====

```

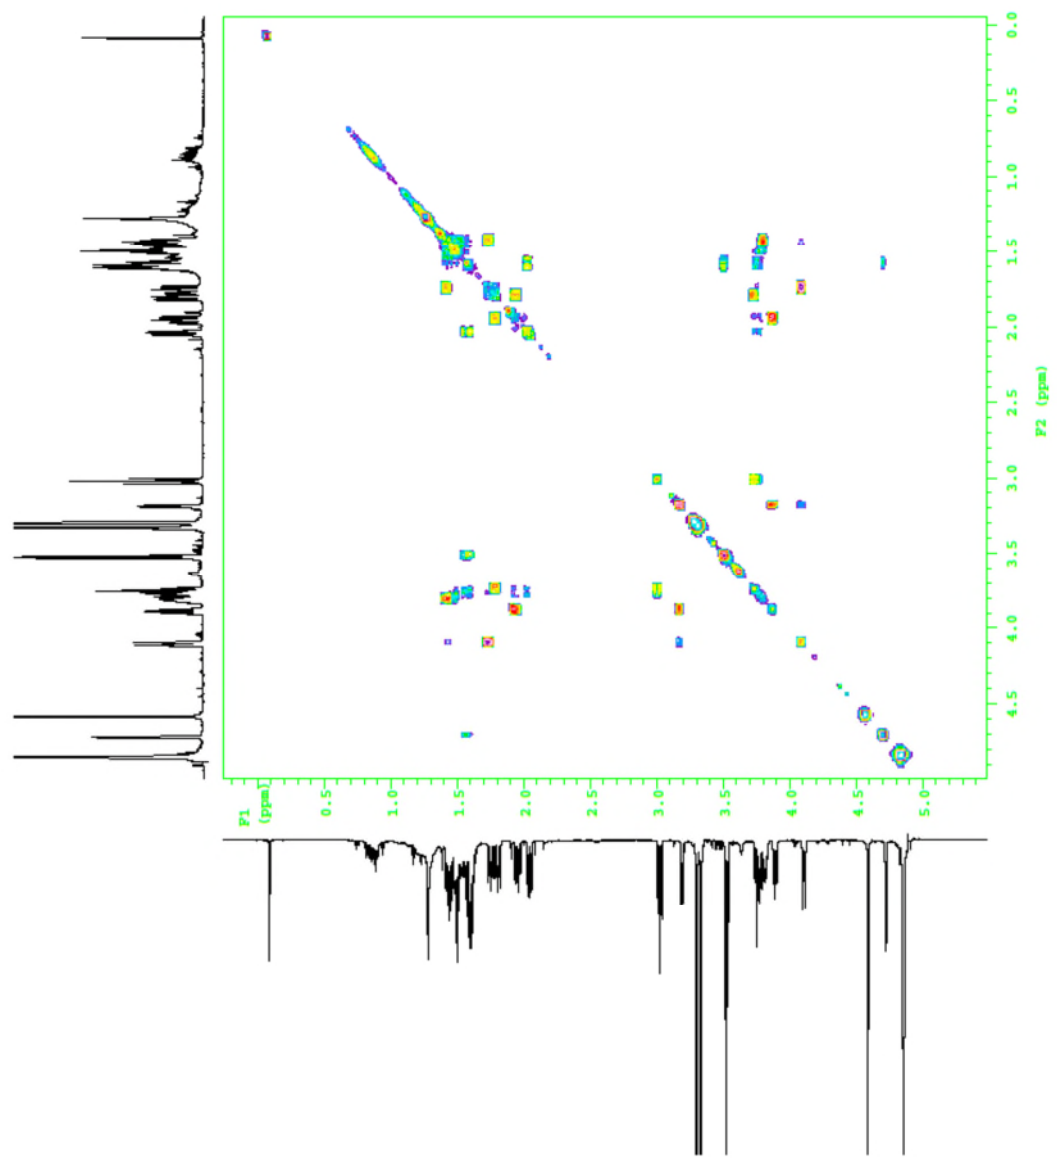

<sup>1</sup>H-<sup>1</sup>H COSY (600 MHz, CD<sub>3</sub>OD)

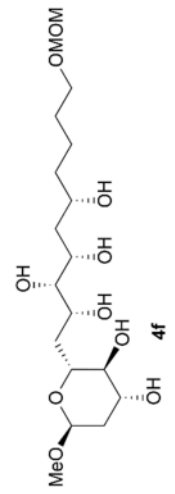





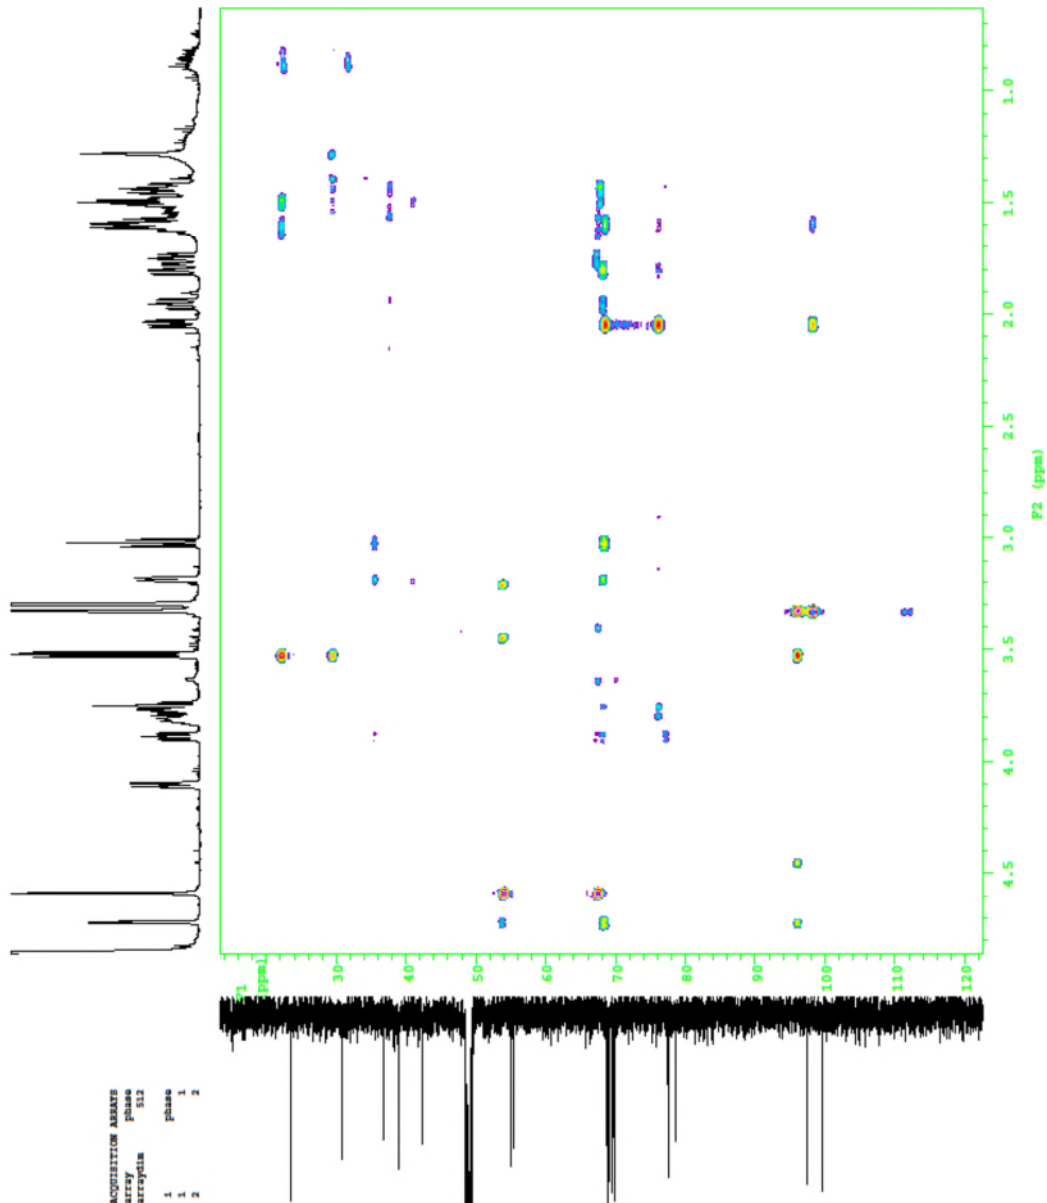

```

EX-31-4_18_Data
exp1 gsmc
=====
SAMPLE                               FLAGS
date Feb 13 2020  hs
solvent cd3od  solv
sample 4f         y
acq 1            y
=====
ACQUISITION PARAMETERS
pr 16615.4  hz
ac 0.150  temp  not used
tp 3884  gain  20
zb 4000  spin  0
as 32
cs 1.000  gr1vl  500
dl 32  gr1  0.00100
dl 32  gr2  0.00100
dl 32  gr3  0.00100
sw 16399.1  gr3  0.001000
nl 256  gr4b  0.001500
phase arrayed  p2  PROCRING2
PERRATION ab  -0.075
antenna n  sbs  not used
wct TRANSMITTER n  in  PROCRING2 4076
ts 599.767  gr1  0.097
srfy 599.767  gr1a  not used
tot 599.7  proc1  1p
tqwr 59  fml  2048
pw 10.500
=====
DC INCOUPLER  cp  306.0
dm  2035.0
grf 1542.4  wrl  2013.0
dm  mm  wpl  14473.4
decouple r40_consumer  r1l  1311.6
dar 31088  rfp  0
dpr 40  r1l1  2164.4
pmsvl 56  rfp1  0
pwr 12.100  wct  PLOT 351.9
j1xh 146.0  ac  9.8
juxh 8.0  wct  208.9
vs 131
vl 131
al obs av  2
=====
ACQUISITION ARRAYS
array y  phase  S12
array y  phase  1
array y  phase  2
=====

```

HMBC (600 MHz, CD<sub>3</sub>OD)

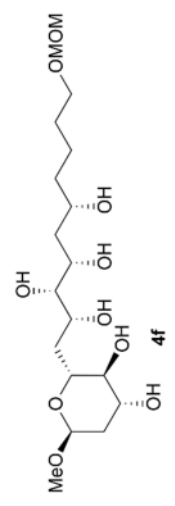

```

FILE      OH-572-1.ais
NAME      OH-572-1
DATE_    Fri Dec 14 20:29:30 2018
DIR      C:\Users\Takamura\Documents\Se...
PROBHD   5mm
PULPROG  zgpg30
DPR      399.65 MHz
AQ       124.00 kHz
RG       1050.00 Hz
FIDRES   7993.60 Hz
SOLVENT  CDCL3
NS       8
DS       4
SWH      4.000 sec
F2       2.900 sec
AQ2      2.640 usec
PC       24.7 C
PWL      1.000 sec
PRG      ARMG LH
SOLVENT  CDCL3
SOLNT    CDCL3
EXREF   7.26 ppm
RGAIN    0.11 Hz
  
```

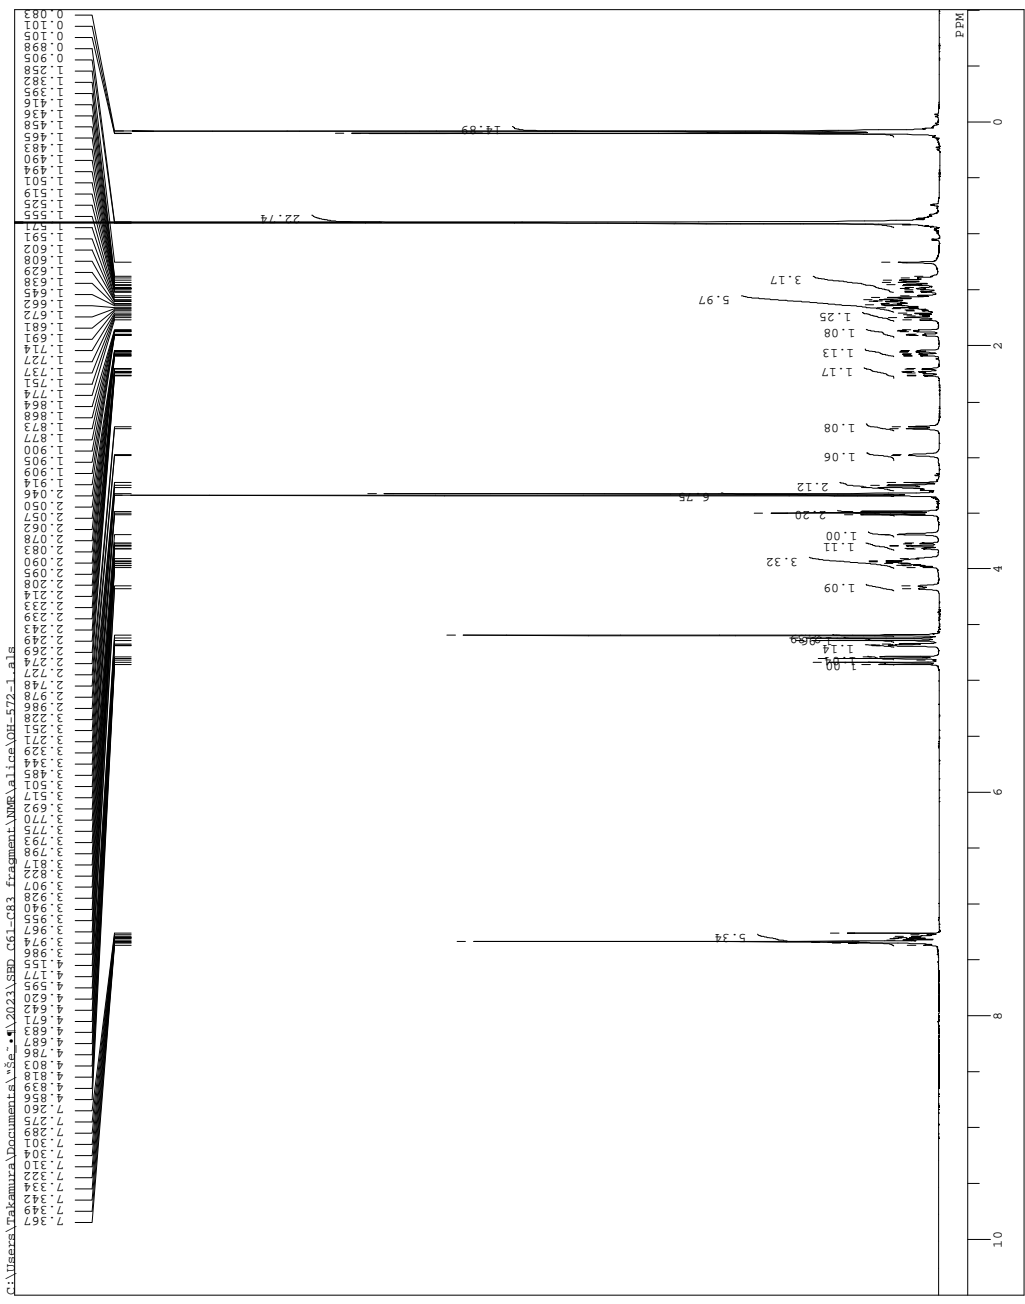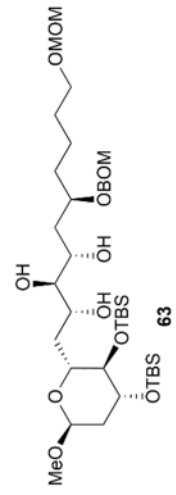

C:\Users\Takatsuma\Documents\Se\*\2021\86D\_661-c83\_fragment\NMR\all\ce\OH=572-1\_13c\_als  
 DEFILE OH-572-1\_13c.als  
 DATE\_13C  
 DATIM Fri Dec 14 20:46:22 2018  
 ORNVC 13C  
 ORNVD BCM  
 ORNVO JC  
 ORSET 100.40 MHz  
 ORFEN 125.00 KHz  
 ORFEN 10500.00 Hz  
 FREQU 271731.90 Hz  
 SCANS 1.280  
 PCQTM 1.7240 sec  
 PM1 6.80 usec  
 IRMVC 1H  
 SINTV 26.6 C  
 SILV1 CDCL3  
 EXREF 77.00 PPM  
 RGAIN 2.25

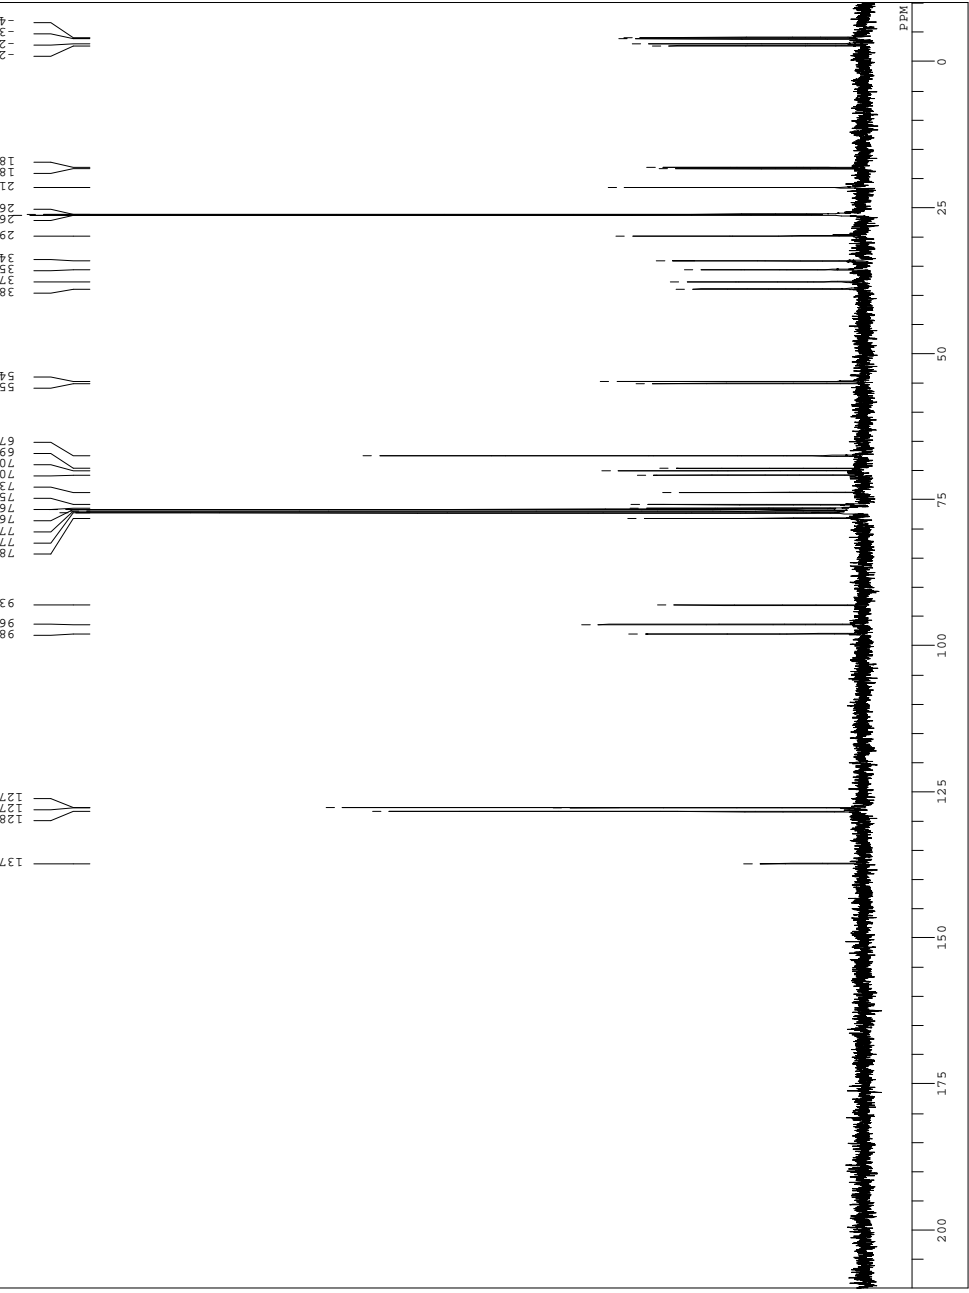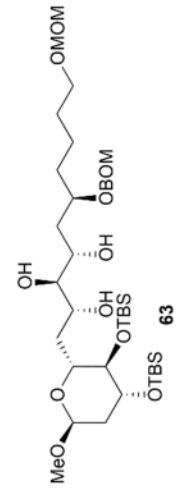

C:\Users\Tpkemura\Documents\1\_36\_4\2023\Fragment\MMX\Valica\OH-574-1\_als

DFILE OH-574-1\_als  
 COMPT Thu Dec 20 00:22:14 2018  
 DATE 11  
 EXMOD NON  
 OBFRQ 399.65 MHz  
 OBSW 10500.00 Hz  
 POINT 10500.00 Hz  
 SCANS 79931.32  
 ACQTM 4.0893 sec  
 PD 2.5010 sec  
 PUL 6.40 usec  
 IPRNUC 1H  
 IPRNUC 1H 24.8 c  
 CTEMP  
 EXREF CDCL3 7.26 ppm  
 BF 0.12 Hz  
 RGAIN 21

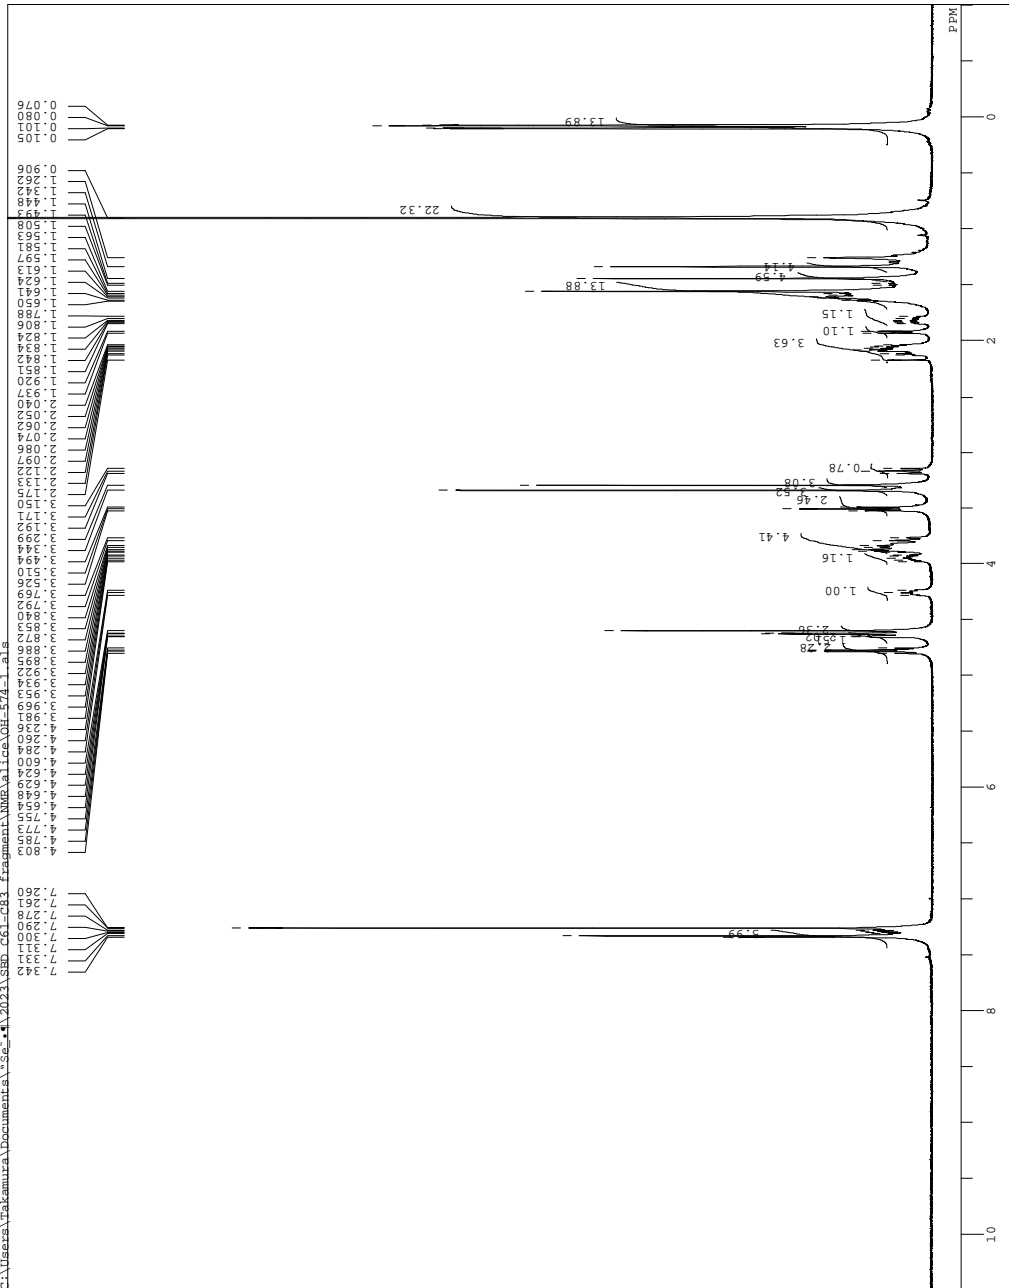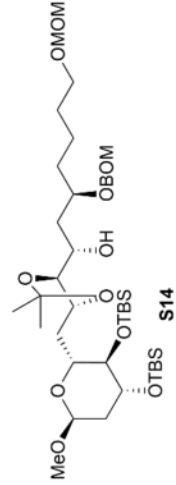

C:\Users\Takamura\Documents\Se\_4\2021\SRD\_561-c83\_frgment\NMR\data\OH-574-1\_13c\_als  
 DEFILE OH-574-1\_13c.als  
 CQM Thu Dec 20 08:44:21 2018  
 COM 13C  
 ENMC 13C  
 EXMOD BCM  
 EXPT 1  
 F1 100.40 MHz  
 F2 125.00 MHz  
 ORF1N 10500.00 Hz  
 PCEN 27137.90 Hz  
 SCANS 10000  
 ACQTM 1.7059 sec  
 PM 1.6780 usec  
 INTC 1H  
 INTN 26.1 c  
 SOLV CDCL3  
 EXRF 77.00 PPM  
 RAIN 2.00 Hz  
 RGAIN 2.24

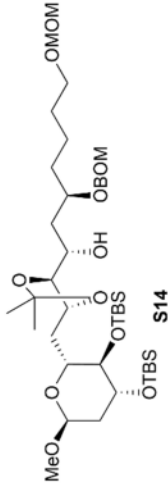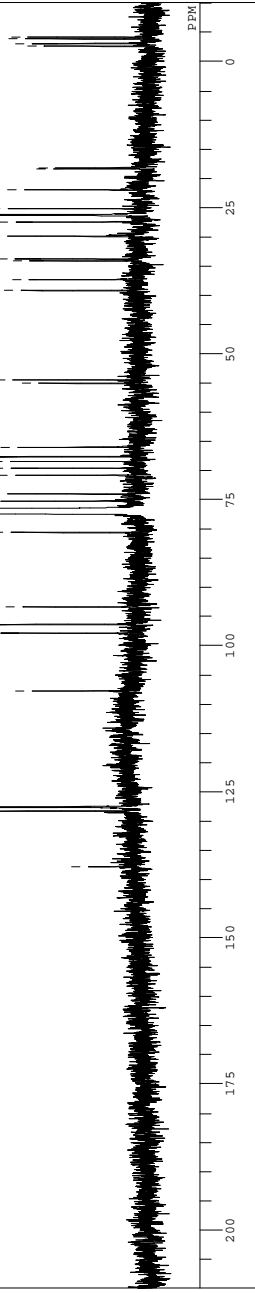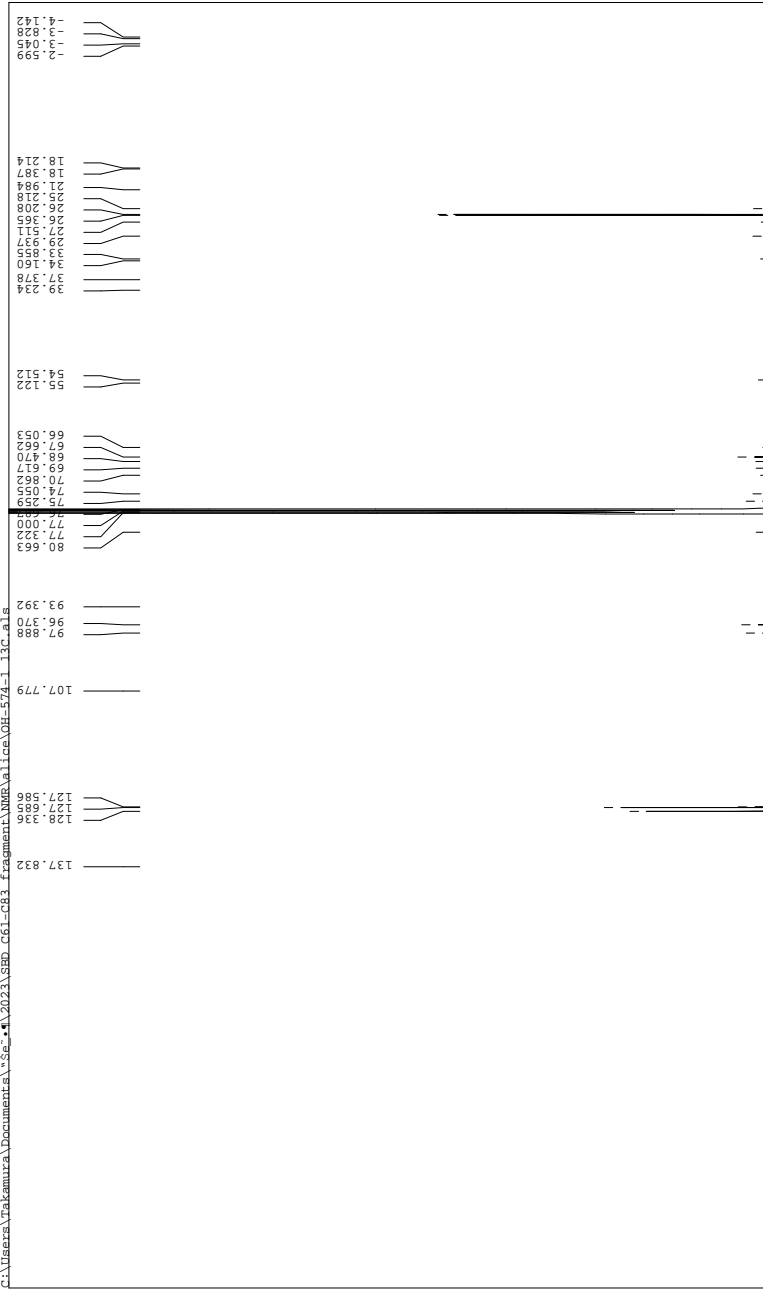

C:\Users\Takamura\Documents\2021\_SSD\_C61\_083\_Fragment\NMR\1D\OH-580.als

```
DFILE OH-580.als  
COMPT F01 Dec 21 00:34:45 2018  
ORIGIN 1H  
EXMOD NON  
OBPRQ 399.65 MHz  
OBPRQ 105500.00 Hz  
POINT 32768  
SCANS 7993.32 Hz  
ACQTM 4.0993 sec  
PUL 2.50 sec  
PI 6.10 usec  
IERNUC 1H 24.9 c  
CTEMP 25.00  
EXREF CDCL3 7.26 ppm  
BF 0.12 Hz  
RGAIN 20
```

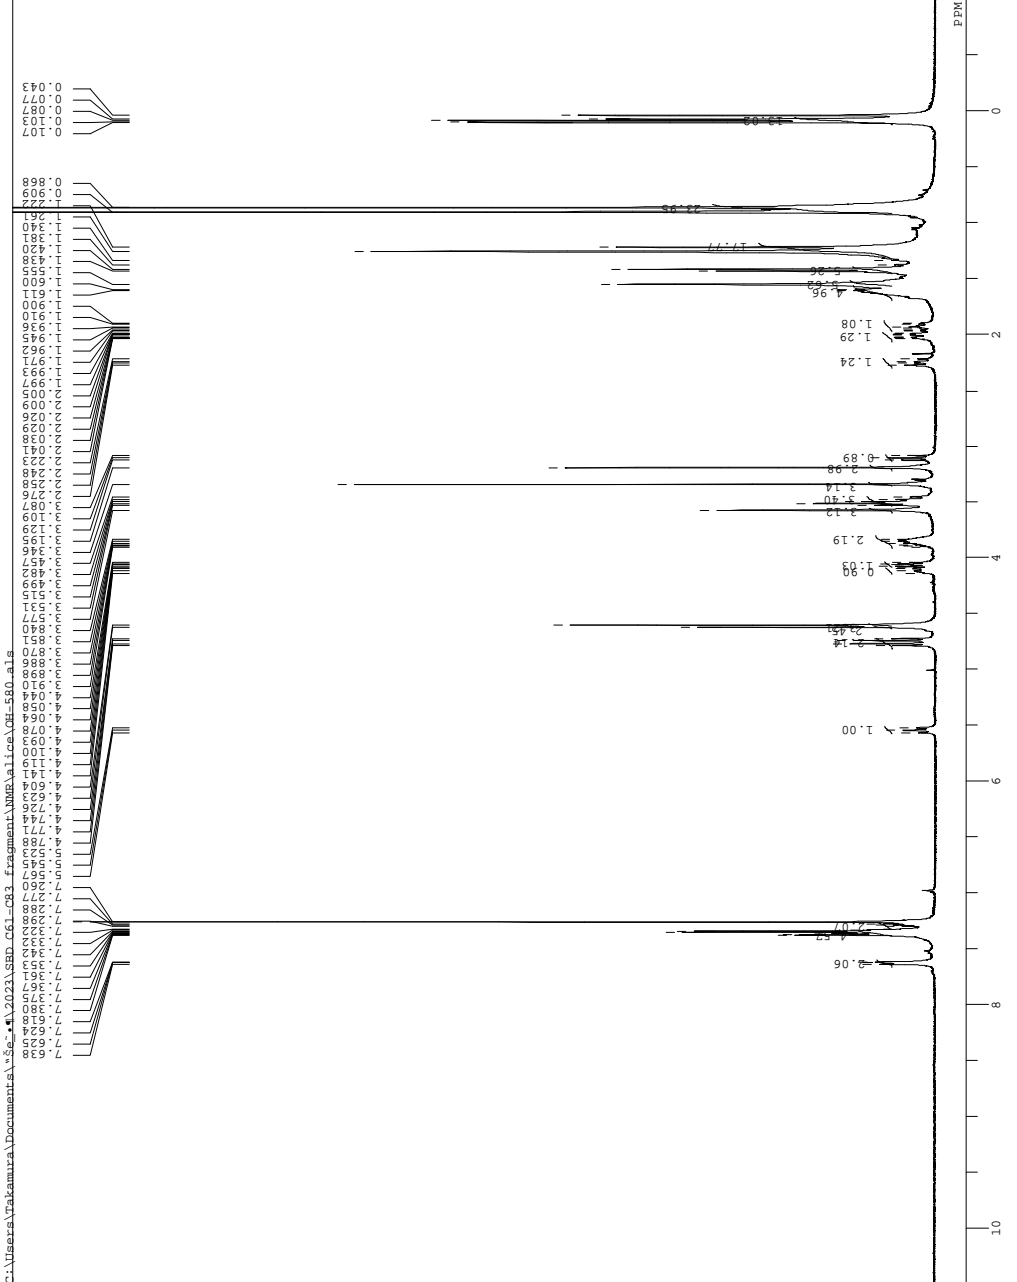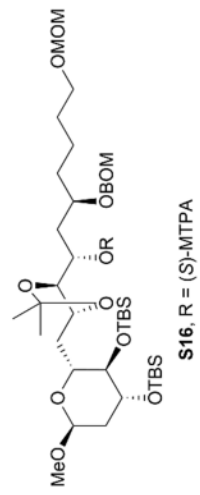







C:\Users\Tarakumura\Documents\13c\20231\_SBD\_C61\_C83\_Fragment\NMR\13c\CH-520\_13c\_als

DFILE OH-520\_13c\_als  
 COMPT Tue Dec 18 06:46:07 2018  
 ORMC 13C  
 EXMOD BCK  
 OBPRQ 100.40 MHz  
 OBSFO 105500.00 Hz  
 POINT 32768 Hz  
 SCANS 271  
 ACOFM 1.2059 sec  
 PD1 1.790 sec  
 PULP 6.00 usec  
 IRRUC 1H 26.0 c  
 CTMP CDCL3 77.00 PPM  
 EXREF BF 2.00 Hz  
 RGAIN 24

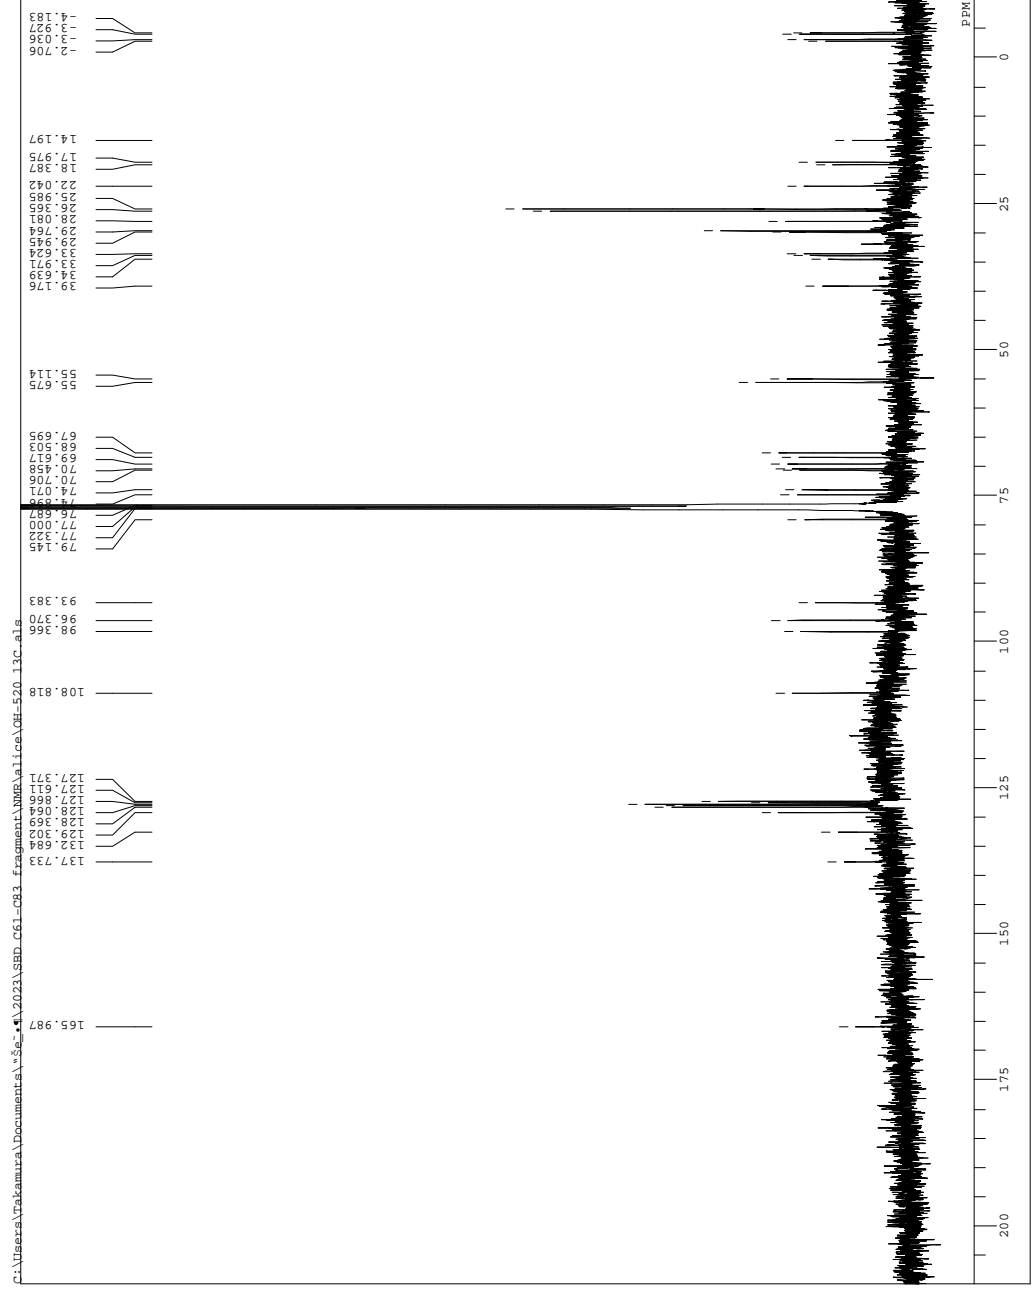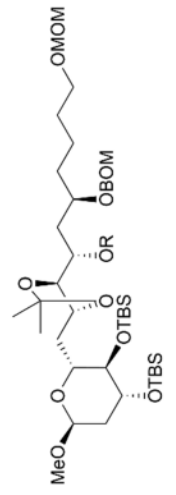

C:\Users\Trakamura\Documents\Se...2023\8BD\_061\_c83\_Fragment\MNH\OH-575\_als  
 FILE OH-575\_als  
 DATE Tue Dec 18 19:05:03 2018  
 INSTR 1H  
 ORBIT 399.65 MHz  
 PULPROG zgpg30  
 EXPTNO 1  
 OBSERV 124.00 KHz  
 OBFTN 10500.00 Hz  
 FREQ 7953.60 Hz  
 F2 -  
 SCANS 4.000  
 DS 2  
 EQ 2.903 sec  
 PC 6.40 usec  
 PM 1  
 L1 24.8 C  
 L2  
 L3  
 SOLT CDCl3  
 EXPT 7.26 min  
 ACQ 0.17 Hz  
 RGAIN

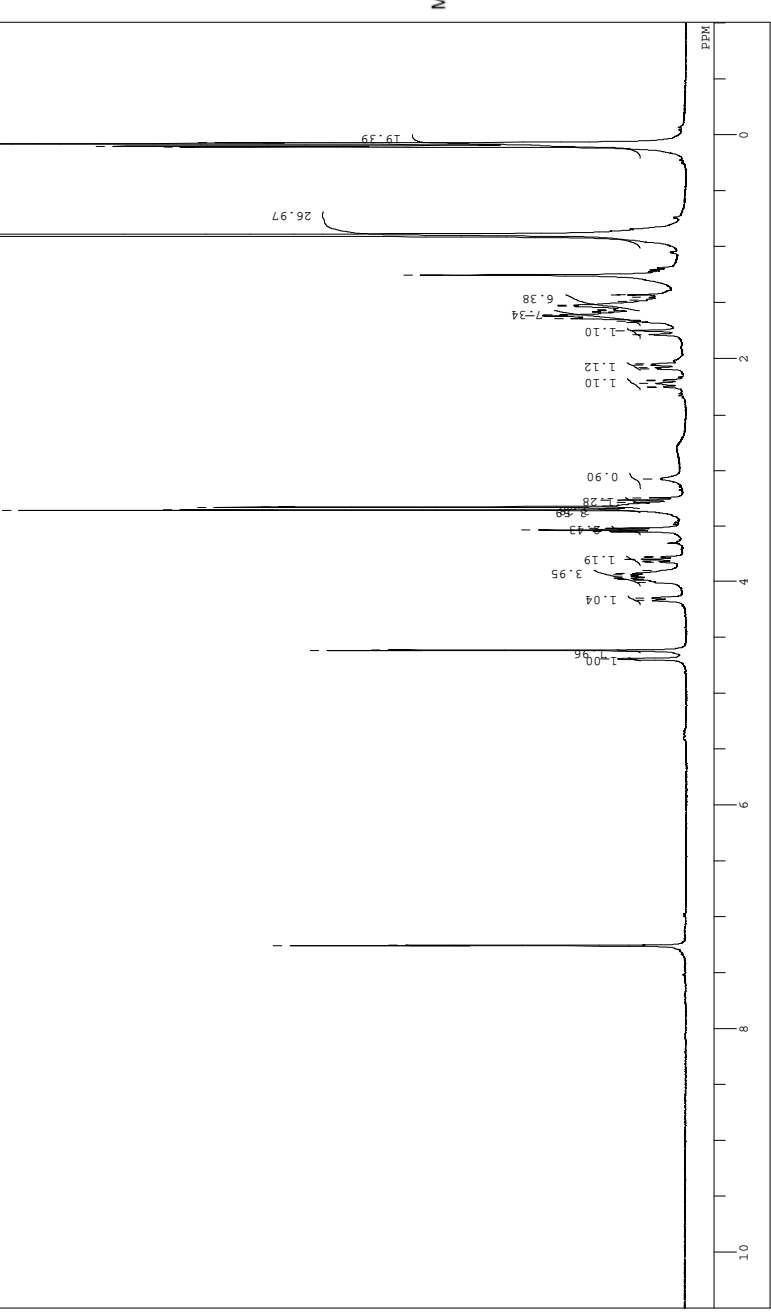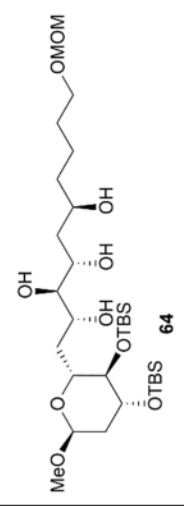

C:\Users\Takahara\Documents\2023\SSD\_C61-C83\_Fragment\NMR\data\OH-575\_13C\_als

DFILE OH-575\_13C\_als  
COMPT Tue Dec 18 20:12:48 2018  
NAME 13C  
EXMOD BCK  
ORF50 100.40 MHz  
ORF51 10500.00 Hz  
POINT 32768  
SCAN 2711  
SCANS 1184  
ACQTM 1.2059 sec  
PD 1.7940 usec  
P1 6.00 usec  
IRNUC 1H  
CTEMP 26.2 c  
EXSOL CDCl3  
EXREF 77.00 ppm  
BF 2.00 Hz  
RGAIN 24

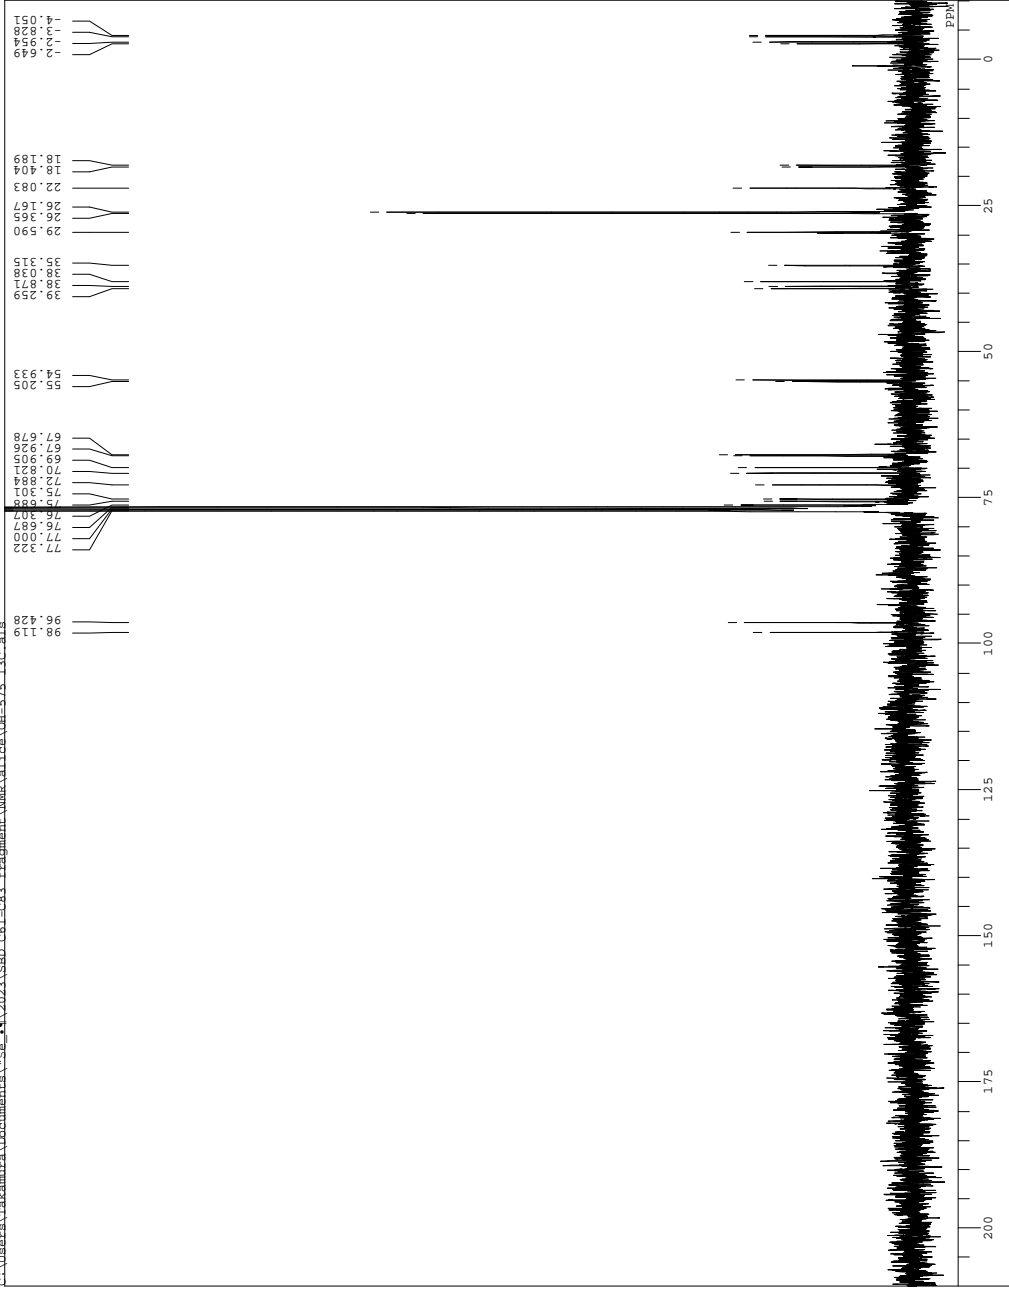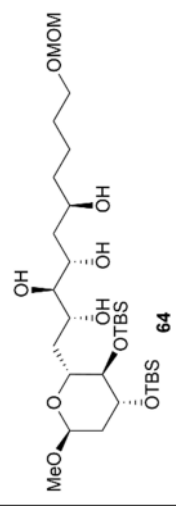

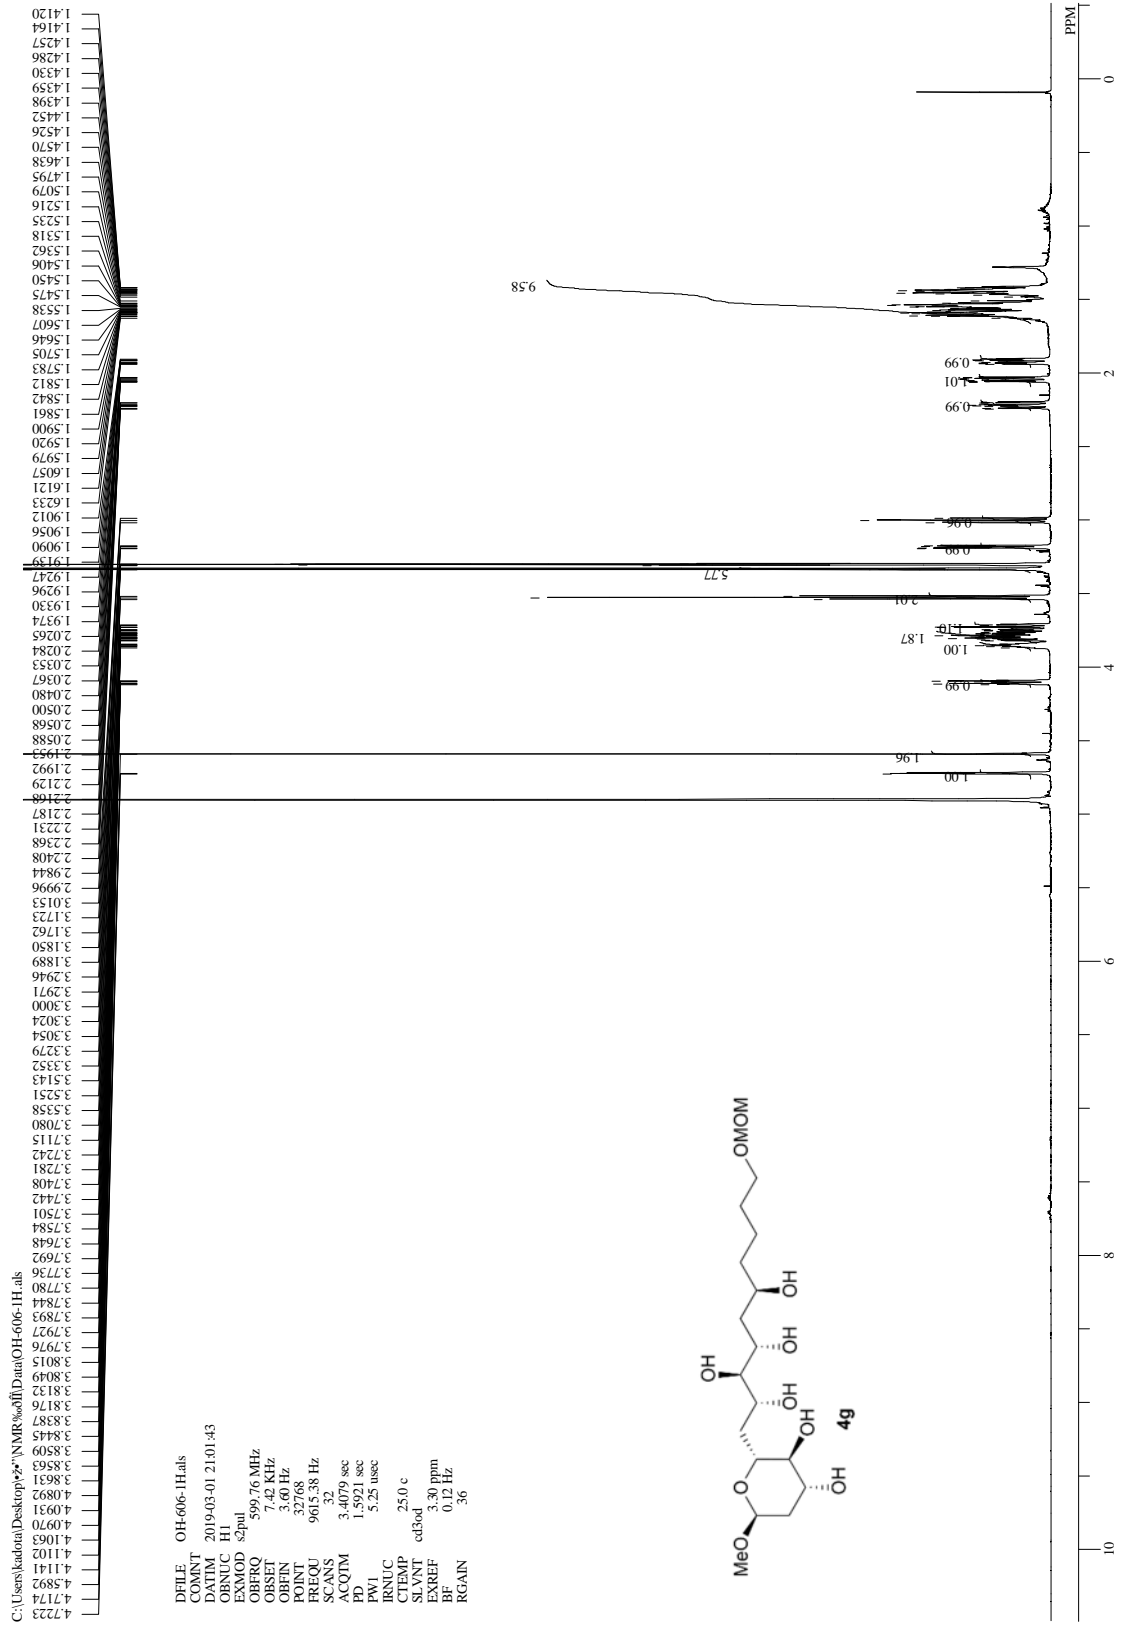

C:\Users\kadota\Desktop\22-1\NMR\%01\Dat\OH-606-13C.als

DFILE OH-606-13C.als  
COMNT  
DATIM 2019-03-01 21:25:52  
ORNUC C13  
EXMOD s2pul  
OBFRQ 150.82 MHz  
OBSET 7.32 KHz  
OBFIN 3.00 Hz  
POINT 327.68  
FREQU 37878.79 Hz  
SCANS 64  
ACQTM 0.8651 sec  
PD 2.1349 sec  
PWLIC 5.775 usec  
SOLVNT  
CTEMP 25.0 c  
EXREF ed3ad  
SLENT 49.00 ppm  
BF 0.12 Hz  
RGAIN 60

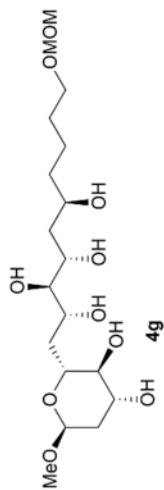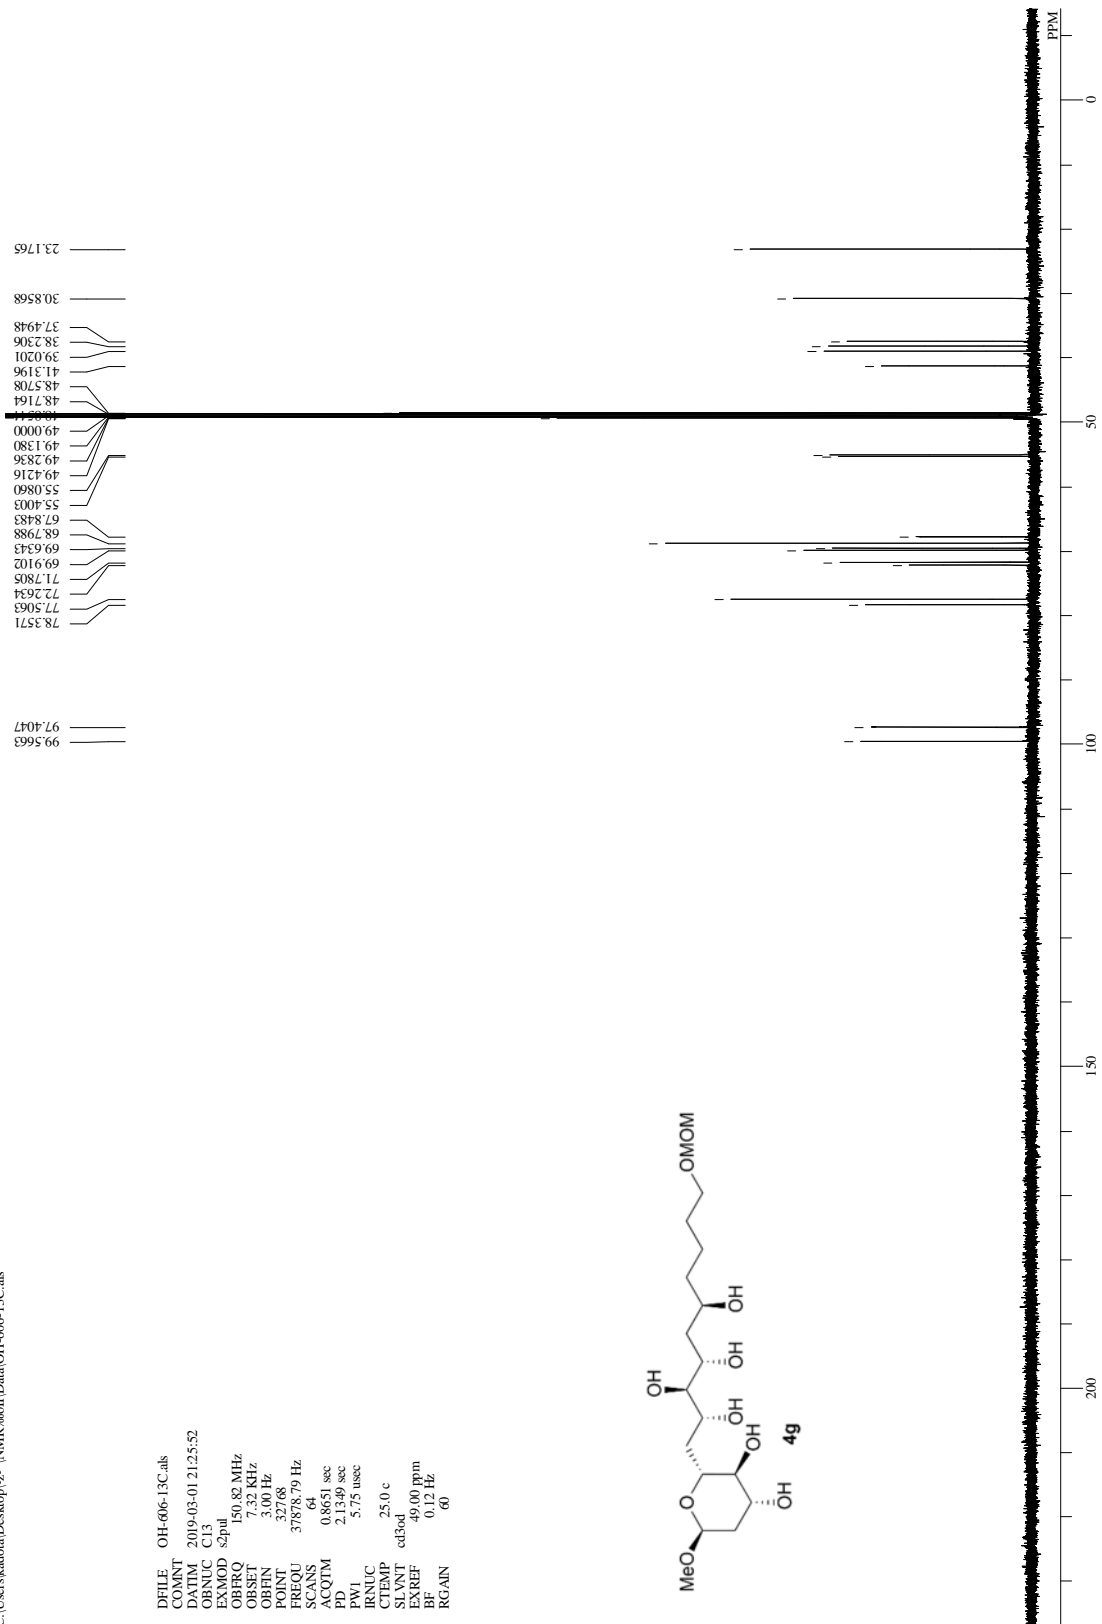

```

exp3 gcosy
=====
SAMPLE                   FLAG#   nm
Date Mar 2 2019         ha
Solvent cd3od           solui   y
Sample                 mgtivi  6120
Acquisition            m      y
=====
acq 0615.4             not used
acq 0615.4             not used
=====
aw 0.150              gain 36
aw 2884                spins 0
aw 4000                f2 processing 0
aw 32                  ad -0.075
aw 1.000               adw not used
aw 0.000               adx not used
aw 0.000               ady not used
aw 0.000               adz not used
aw 0.000               adxx not used
aw 0.000               adyy not used
aw 0.000               adzz not used
=====
f1 0615.4             not used
f1 138              not used
=====
cs PREPARATION 0 prool   hp
cs PREPARATION 0      full  4096
=====
NAME#      n   sp   DISPAR#  -23.4
NAME#      n   sp   DISPAR#  -23.4
=====
wv TRANSMITTER      ns   3023.4
wv TRANSMITTER      ns   -127.2
wv TRANSMITTER      ns   -127.2
=====
afreq 539.767       wpl  2386.9
afreq 539.767       wpl  2386.9
=====
tqc 599.7          rrl  2386.5
tqc 599.7          rrl  2386.5
=====
tpr 59            rfp  1979.2
tpr 59            rfp  1979.2
=====
pw 16.500         rfil  2099.7
pw 16.500         rfil  2099.7
=====
pwr CHANNEL#  0102   rfd  1979.2
pwr CHANNEL#  0102   rfd  1979.2
=====
pf1 0.001000       wt  351.9
pf1 0.001000       wt  351.9
=====
stratio 1.000      ac   9.8
stratio 1.000      ac   9.8
=====
grabb 0.000500     wsc  208.9
grabb 0.000500     wsc  208.9
=====
ds ENCOUPLE      ac2  0
ds ENCOUPLE      ac2  0
=====
ds     min    31    cod  87  3

```

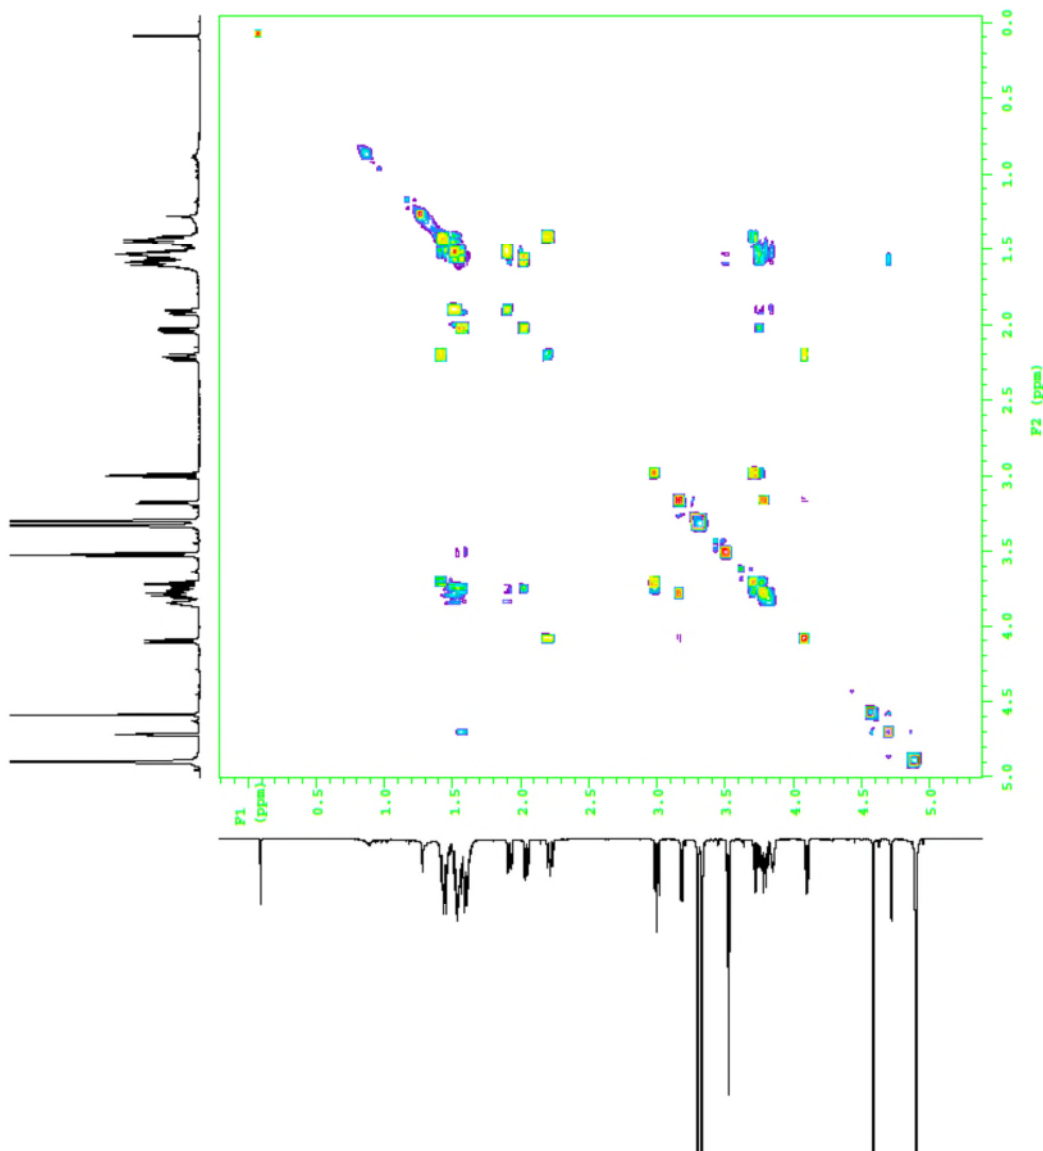

$^1\text{H}$ - $^1\text{H}$  COSY (600 MHz,  $\text{CD}_3\text{OD}$ )

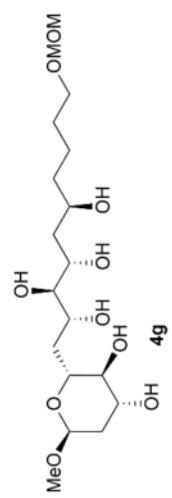

```

exp4 gmqc
=====
date_   Mar  1 2019   hr   FLAG
time    0000         y
=====
NAME    0000         y
EXPNO   7
PROCNO  1
PROCPS  1
AQ      0.150      temp not used
RG      2884      gain
DS      4000      spin
AQ      1.400      ps/line
SI      0.002000
US      32      gzb
2D ACQUISITION ENRatio 3.977
F1 25441.0 gzbab 0.000100
F2 200      F2 PROCESSING
=====
phase  arrayed f1 not used
PREPARATION  f2 not used
NAME      0000
WAX       8      F1 PROCESSING
=====
TRANSMITTER 8      F1 0.007
tx          tx f1a1 not used
afreq      599.767 ppsol hp
tort       599.7   thl  DIBPAM 2048
t1pr       10.100  sp
P1 ENCOUPLE  Wp      2843.8
ds          CL3  wpa  2793.8
corz       -2982.0 wpa  13421.5
om         omv  r1l  3190.1
=====
Oscova W40_consumer rfp 1979.2
Osc 31000 r1l 1977.5
Osc 31000 r1l 1979.7
pbcv1      56 rfp 1979.7
pwr        12.100 wv
=====
j1ub      gmqc ac      5.8
j1ub      146.0 wv2  208.9
malicig   y acz      0
mit       2 va      436
=====
SI  ods pb  1

```

```

=====
ACQUISITION ARRAYS
array      phase
arrcp1a1  400
1          1
2          2

```

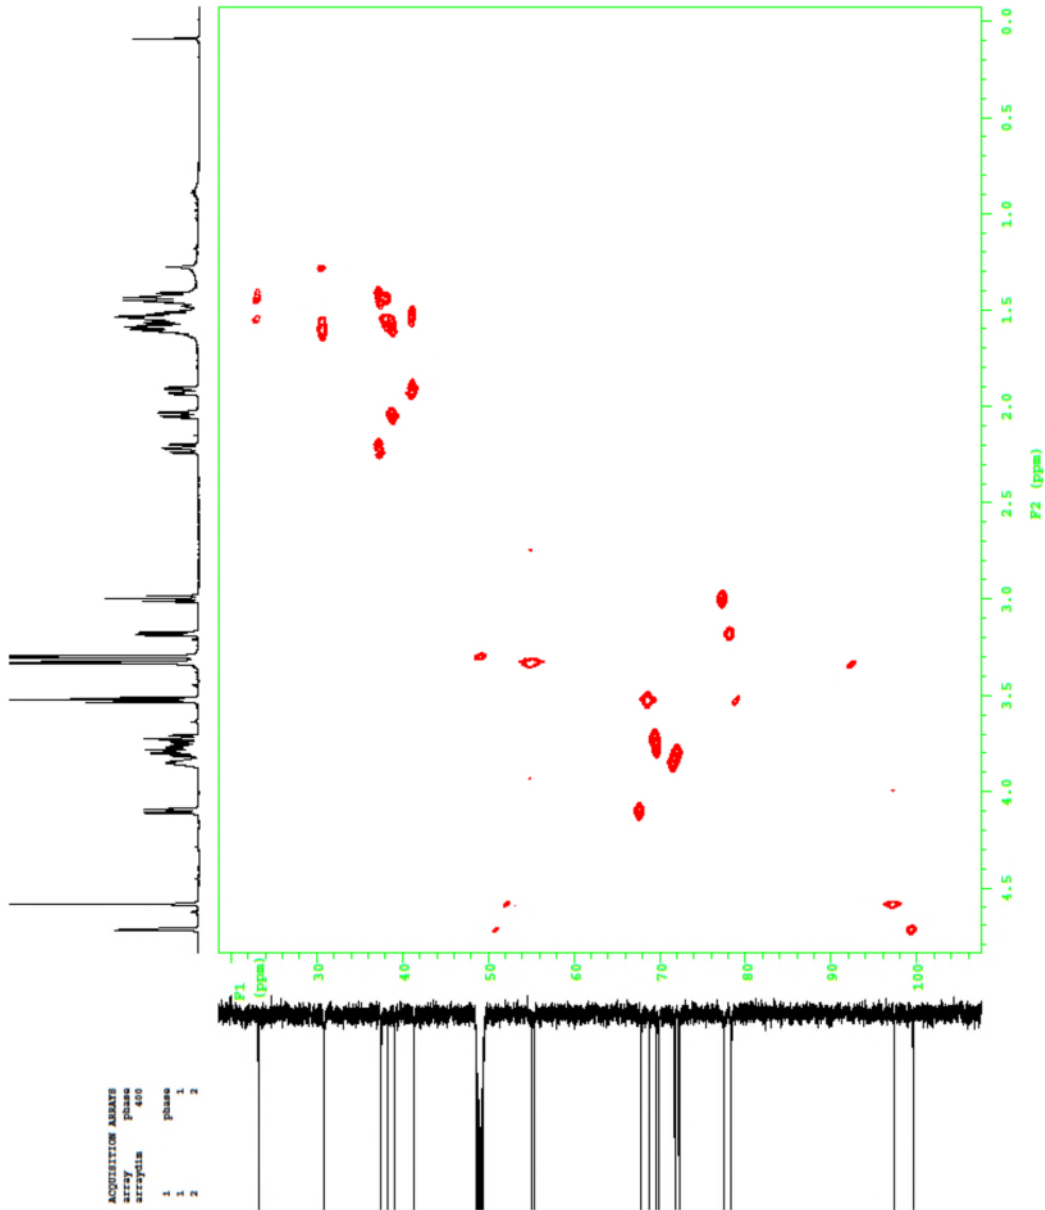

HMQC (600 MHz, CD<sub>3</sub>OD)

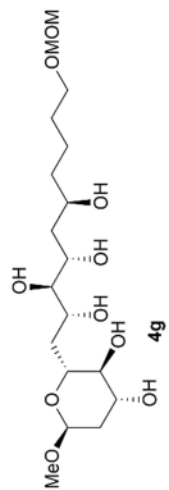





C:\Users\takamura\Documents\\*\_s\*\_4\2023\SED\_C61-C83\_Fragment\NMR\alic\OH-579\_a1s  
 DF FILE OH-579\_a1s  
 DOPM Thu Dec 20 17:07:24 2018  
 ORNUC 1H  
 EXMOD NON  
 OSET 399.55 MHz  
 OBFIN 124.00 KHz  
 OFREQ 10500.00 Hz  
 PREP1 7992.76 Hz  
 SCANS 4  
 ACQTM 4.0973 sec  
 PUL 2.640 usec  
 IERNUC 1H  
 IERNUC 25.5 c  
 SLVNT CDCL3  
 EXREF 7.26 ppm  
 REFIN 0.12 Hz  
 REFIN

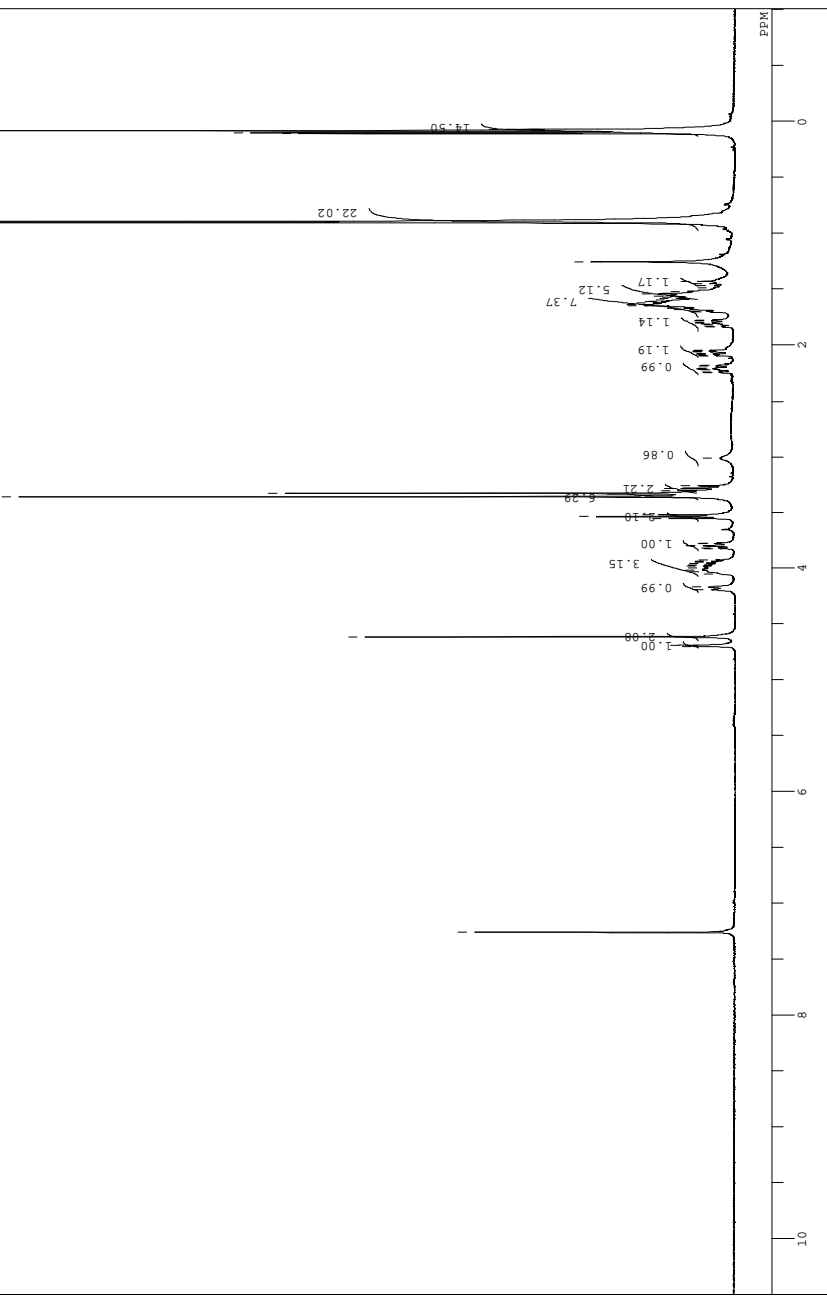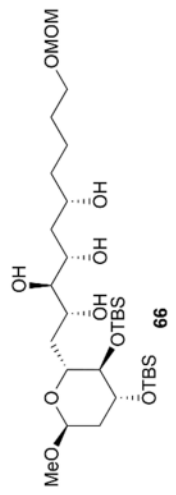

C:\Users\Tpkemura\Documents\sa\_s\*\2023\Fragment\NMR\alpha\OH-579\_13c.a1s

DFILE OH-579\_13c.a1s  
COMPT Thu Dec 20 17:03:17 2018  
PROC 13C  
EXMOD BCM  
OBPFO 100.40 MHz  
OBPFI 10500.00 Hz  
OBFIN 10500.00 Hz  
POINT 27132768 Hz  
SCANS 1445  
ACQTM 1.2059 sec  
PD 1.7940 sec  
PUL 6.50 usec  
INNUC 1H  
IRNUC 1H 26.2 c  
CTEMP  
EXREF CDCL3 77.00 PPM  
BF 2.00 Hz  
RGAIN 24

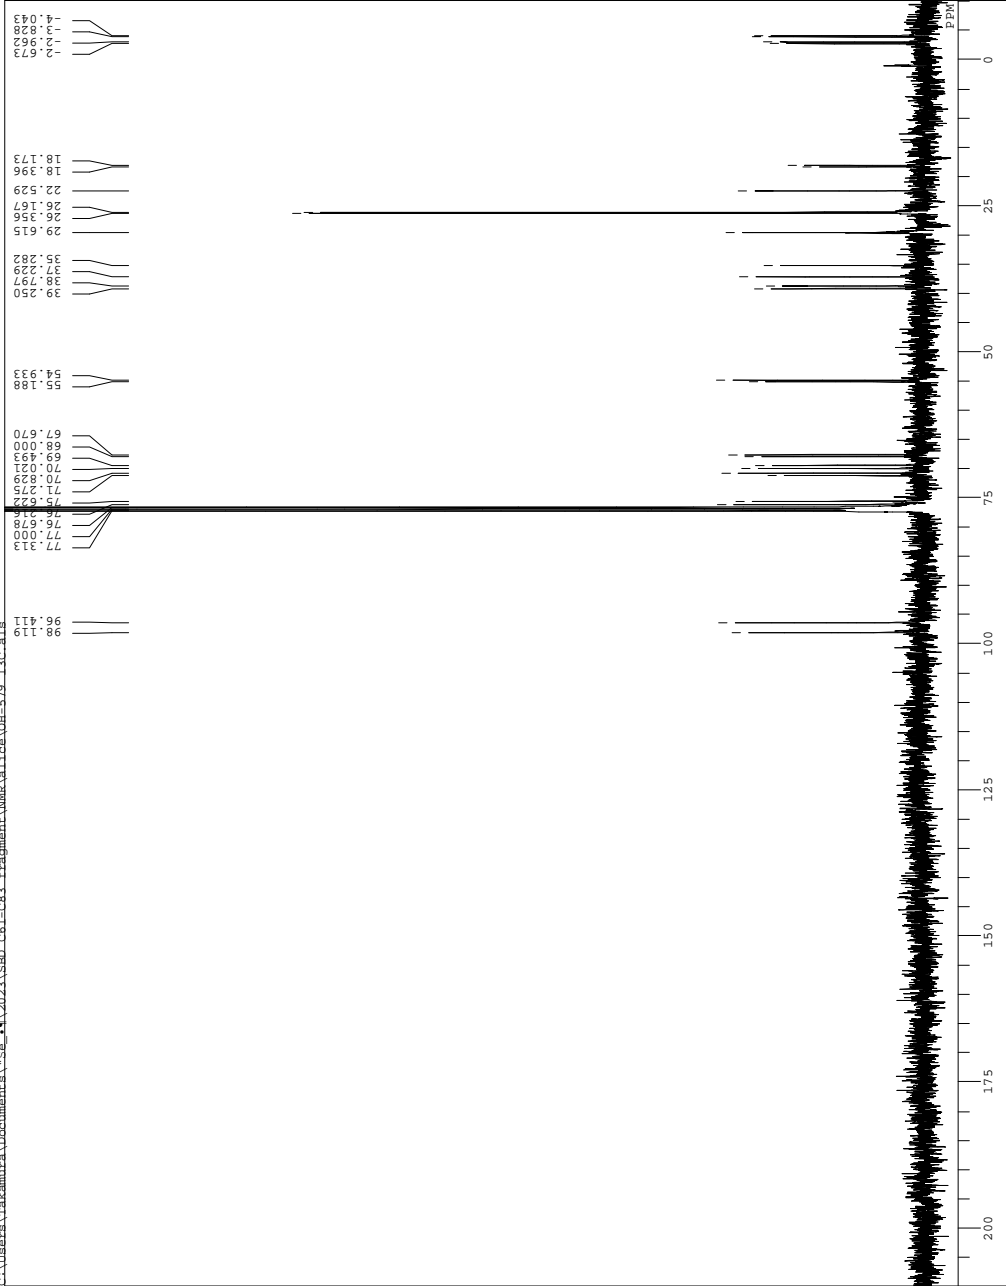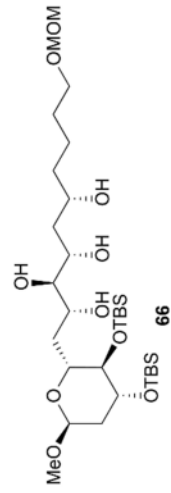

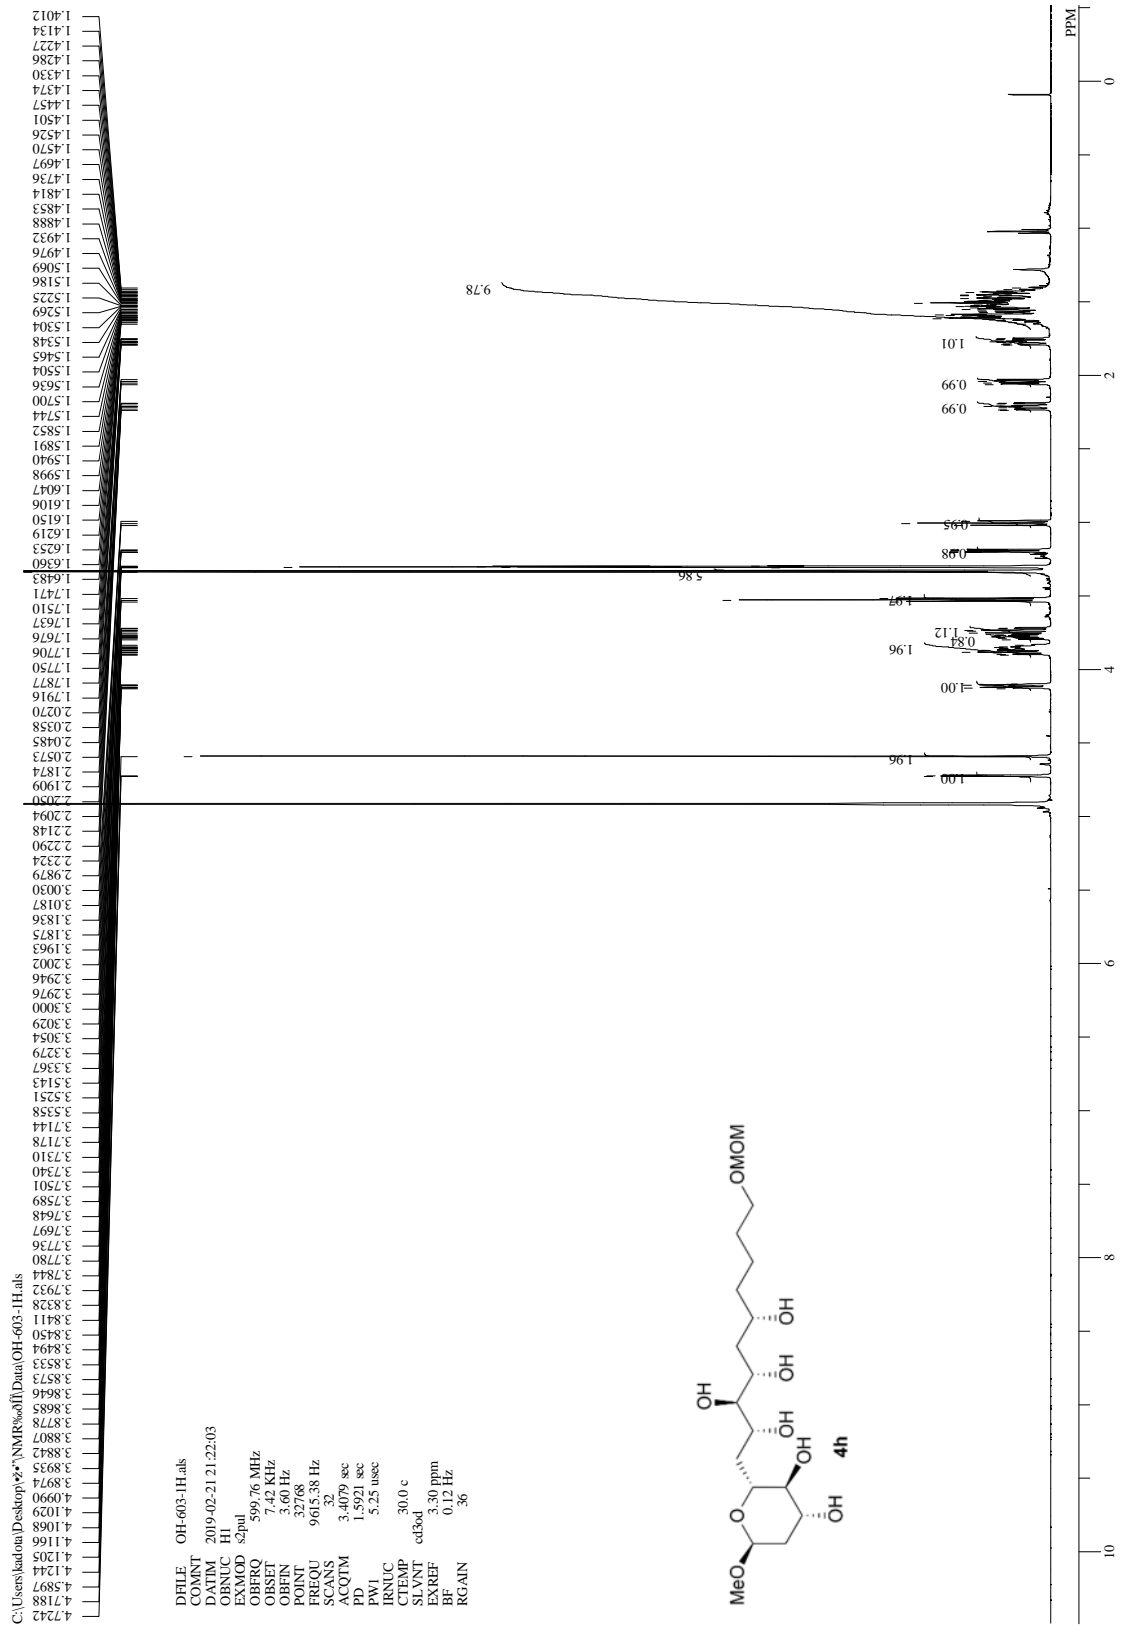

C:\Users\Takamura\Documents\562-4\2021\SBD\_C61\_CB3\_fragment\NMR\alice\OH-603-13C.a1s

DFILE OH-603-13C.a1s  
 COMNT 0019-02-21 21:34:39  
 ORNAM C13  
 EXMOD s2pul  
 OBFRQ 150.92 MHz  
 OBFREQ 32768 Hz  
 POINT 37878.64 Hz  
 SCANS 2  
 ACQTM 0.8651 sec  
 PD 2.1349 sec  
 PD1 5.73 usec  
 IRNUC cd3od  
 CTMP 30.0 c  
 EXREF 49.00 Ppm  
 BF 0.12 Hz  
 RGAIN 60

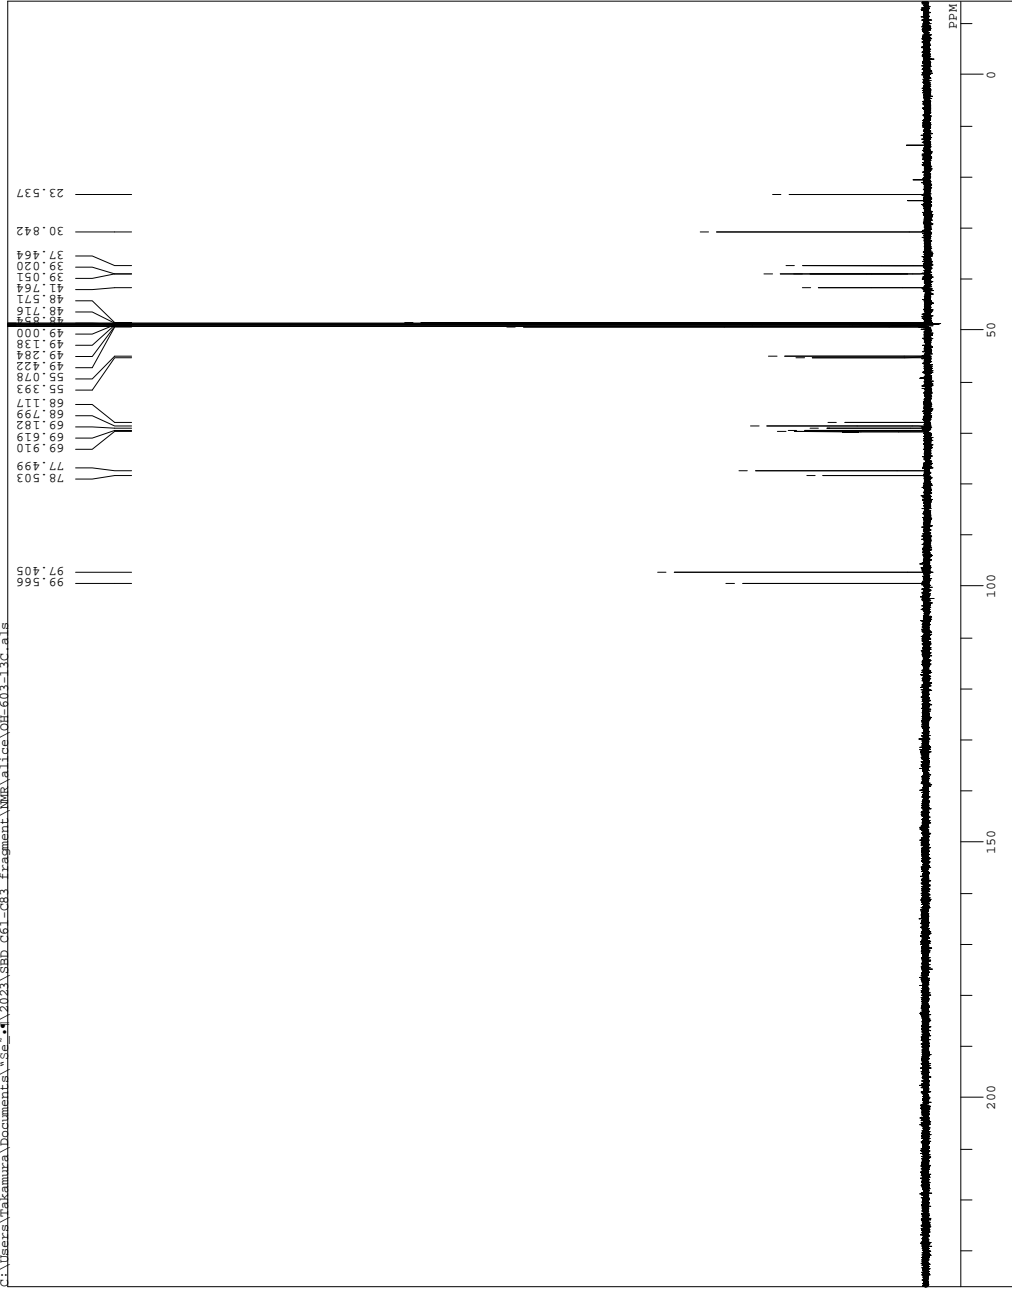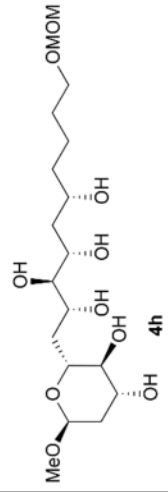

```

mp3 500T
=====
NAME          SAMPLE
DATE_ TIME    21 2018   ba
SOLVENT       CD3OD
SAMPLE        6120
=====
ACQUISITION  9615.4 temp not used
PC           0.150 gain
PP           4000
SS           32 ad
TT           0.075
CL           1.000 abs not used
SC           4 fa
=====
2D ACQUISITION F1 PROCESSING
MW1          9615.4 acq -0.013
SI           120
SN           0
PR            0
PERMANENT    4896
=====
NAME         ba
WVC          0
TX           0
TRANSMITTER 0
TX           0
FREQ         599.97
LTYPE       59 FID
PW           10.500
P1           1979.2
P2           1979.2
=====
SILVER      5102
GUN         0.001000 wt
METHALCO   1.000 wt
SPINRATIO   0.000000
=====
ON          0
ENCODER     CL3
=====
OM          0
RES         13
SI          0
CGS         4

```

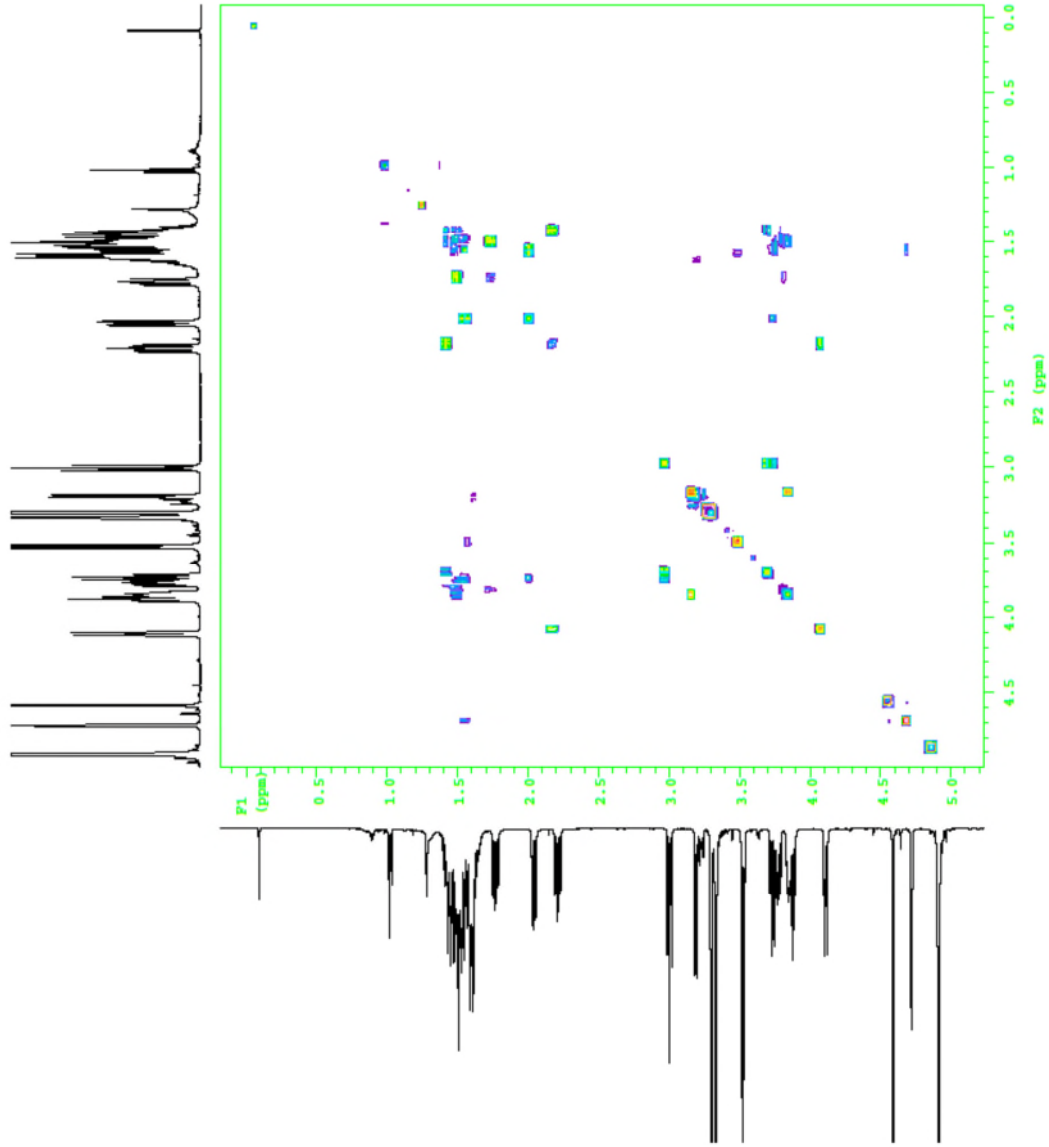

<sup>1</sup>H-<sup>1</sup>H COSY (600 MHz, CD<sub>3</sub>OD)

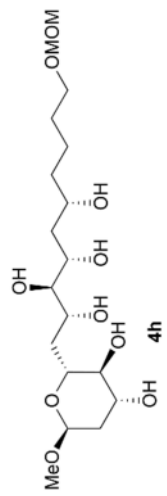

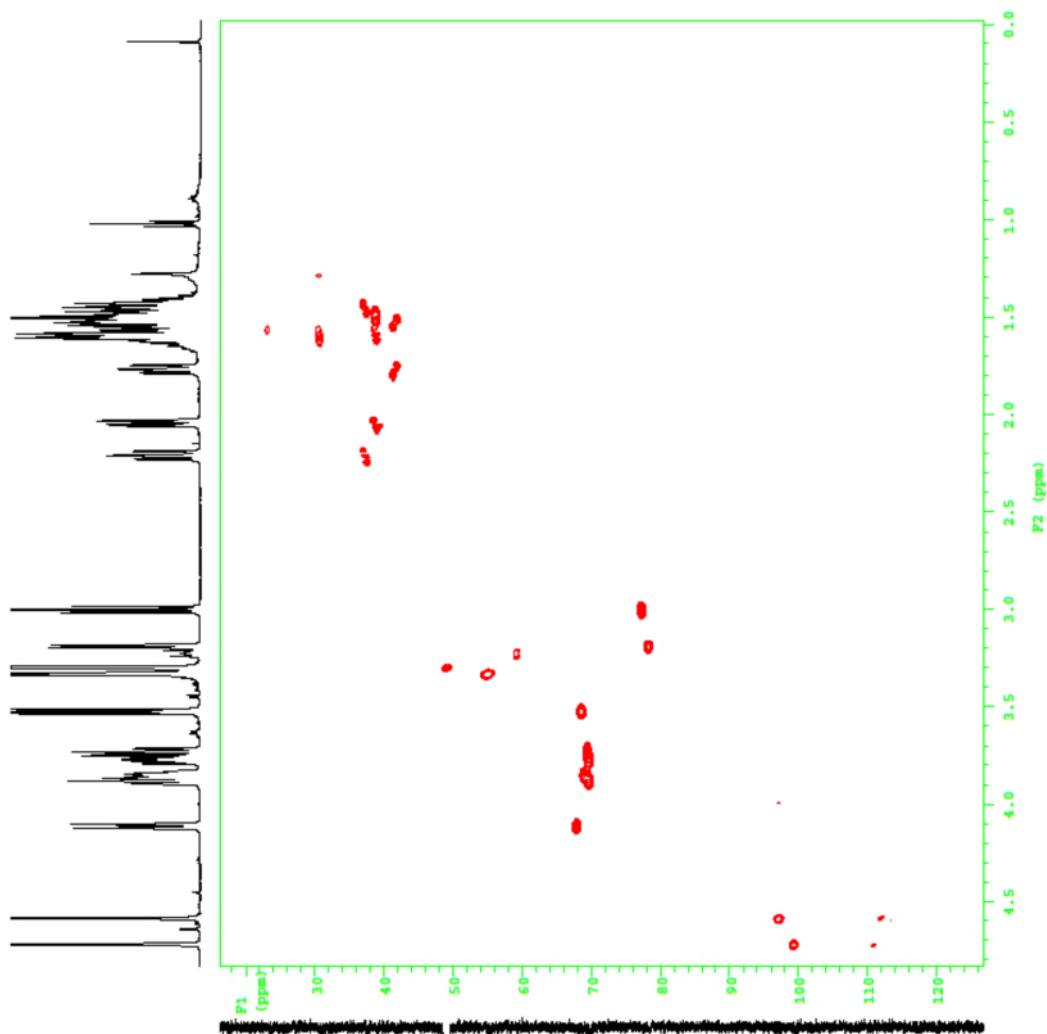

exp1 gsmc  
 date Feb 22 2019 hr  
 solvent cd3od  
 sample 4h  
 acqno 9411.4  
 acq 0.150 temp not used  
 p1 1800 sp1s 60  
 p2 4000 sp2s 80  
 p3 0  
 p4 32 GRADIENTS  
 p5 1.000 gain 5162  
 p6 32 GE 0.002000  
 ID ACQUISITION 3.977  
 ac 3460.1 S/N 0.34500  
 at 200 P2 PROCESSING  
 phase arrayed gf 0.069  
 PRESATURATION gfs not used  
 sitaxs n fn 4096  
 wt TRANSMITTER n FI PROCESSING  
 tx 0.005  
 rfc not used  
 4fz 599.747 frcol 10  
 tot 599.7 fsi 2048  
 tpr 59 59 DISPLAY  
 pw 18.500 sp -8.9  
 INCOUPLER wp 2986.2  
 da CL3 sp 2451.2  
 de 154.6 fsi 1388.0  
 deconv W40 convmr ftd 1978.2  
 dat 35088 rfil 8732.9  
 qpr 40 rtp1 7389.7  
 pcvl 56  
 psc 12.100 wt 351.9  
 jlab 146.0 wds 208.9  
 nullif y 803  
 mult 2 vs 222  
 at cde pb 1

HMQC (600 MHz, CD<sub>3</sub>OD)

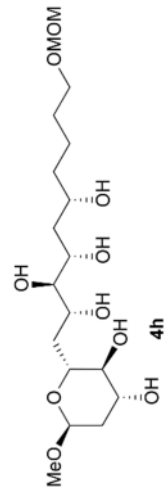

```

exp5 gsmc
=====
NAME: 20130322_013
DATE_: 20130322
TIME: 13:00
PROC: 1
SOLVENT: CD3OD
SAMPLE: 4
ACQUISITION: 1
P1: 1.000
P2: 0.01000
P3: 0.01000
P4: 0.01000
P5: 0.01000
P6: 0.01000
P7: 0.01000
P8: 0.01000
P9: 0.01000
P10: 0.01000
P11: 0.01000
P12: 0.01000
P13: 0.01000
P14: 0.01000
P15: 0.01000
P16: 0.01000
P17: 0.01000
P18: 0.01000
P19: 0.01000
P20: 0.01000
P21: 0.01000
P22: 0.01000
P23: 0.01000
P24: 0.01000
P25: 0.01000
P26: 0.01000
P27: 0.01000
P28: 0.01000
P29: 0.01000
P30: 0.01000
P31: 0.01000
P32: 0.01000
P33: 0.01000
P34: 0.01000
P35: 0.01000
P36: 0.01000
P37: 0.01000
P38: 0.01000
P39: 0.01000
P40: 0.01000
P41: 0.01000
P42: 0.01000
P43: 0.01000
P44: 0.01000
P45: 0.01000
P46: 0.01000
P47: 0.01000
P48: 0.01000
P49: 0.01000
P50: 0.01000
P51: 0.01000
P52: 0.01000
P53: 0.01000
P54: 0.01000
P55: 0.01000
P56: 0.01000
P57: 0.01000
P58: 0.01000
P59: 0.01000
P60: 0.01000
P61: 0.01000
P62: 0.01000
P63: 0.01000
P64: 0.01000
P65: 0.01000
P66: 0.01000
P67: 0.01000
P68: 0.01000
P69: 0.01000
P70: 0.01000
P71: 0.01000
P72: 0.01000
P73: 0.01000
P74: 0.01000
P75: 0.01000
P76: 0.01000
P77: 0.01000
P78: 0.01000
P79: 0.01000
P80: 0.01000
P81: 0.01000
P82: 0.01000
P83: 0.01000
P84: 0.01000
P85: 0.01000
P86: 0.01000
P87: 0.01000
P88: 0.01000
P89: 0.01000
P90: 0.01000
P91: 0.01000
P92: 0.01000
P93: 0.01000
P94: 0.01000
P95: 0.01000
P96: 0.01000
P97: 0.01000
P98: 0.01000
P99: 0.01000
P100: 0.01000
=====

```

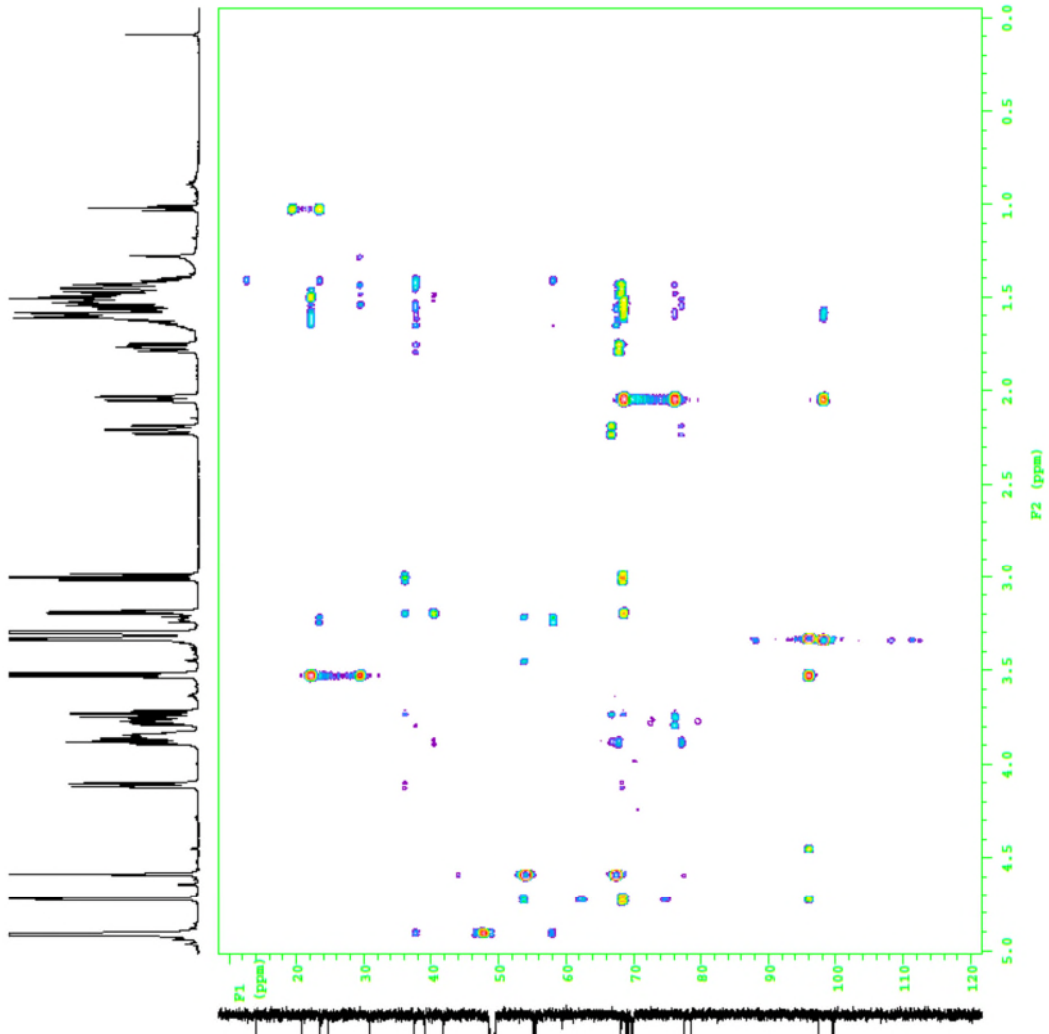

HMBC (600 MHz, CD<sub>3</sub>OD)

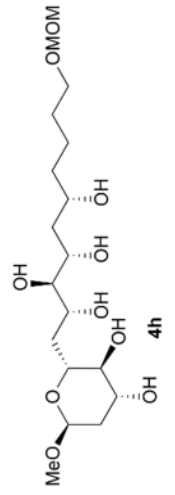

Supplement: d3ob01420g1.pdf [file d3ob01420g1.pdf]
